# Supplementary material for: Onset of taste bud cell renewal starts at birth and coincides with a shift in SHH function
Source: eLife. 2021 May 19;10:e64013. doi: 10.7554/eLife.64013 (PMC8172241; doi:10.7554/eLife.64013)
Supplement: Supplementary file 1. — (a) List of all differentially expressed protein-coding genes (DEGs) in SOX2-GFPlow and SOX2-GFPhigh lingual epithelial cells of neonatal mice at P0. Non-protein-coding genes and genes with no expression across all samples were removed prior to analysis. Genes with an absolute fold change ≥ 1.5 and FPKM ≥ 5 in each sample were designated as differentially expressed. (b) List of DEGs enriched in SOX2-GFPhigh lingual epithelial cells at P0. (c) List of DEGs enriched in SOX2-GFPlow lingual epithelial cells at P0. (d) List of Gene Ontology (GO) biological process terms associated with genes enriched in SOX2-GFPhigh lingual epithelial cells of neonatal mice at P0. (e) List of GO biological process terms associated with genes enriched in SOX2-GFPlow lingual epithelial cells at P0. (f) List of transcription factors with binding motifs enriched in SOX2-GFPhigh cells, including Sox2, Foxa2, and Foxa1.(g) Gene lists of potential SOX2 and/or FOXA2 and/or FOXA1 target DEGs enriched in SOX2-GFPhigh lingual epithelial cells at P0. (h) List of GO biological process terms associated with FOXA2 and/or FOXA1 and/or SOX2 target genes enriched in SOX2-GFPlhigh lingual epithelial cells. (i) Lists of SOX2-GFPhigh DEGs found in biological process GO terms ‘…cell adhesion’ and ‘…cell motility’ potentially regulated by FOXA1 and FOXA2. [file elife-64013-supp1.xlsx]

## Sheet: 1a P0_protein_coding_genes_FDR
1a: Protein Coding Gene Expression (SOX2-GFP_High and SOX2-GFP_Low)
Gene	Common_name	P0 GFP Low_mean	P0 GFP High_mean	Fold_change
ENSMUSG00000021252	0610007P14Rik	50.99	55.83	1.09
ENSMUSG00000007777	0610009B22Rik	27.68	30.81	1.11
ENSMUSG00000024442	0610009O20Rik	46.36	45.38	-1.02
ENSMUSG00000042208	0610010F05Rik	14.33	13.01	-1.1
ENSMUSG00000020831	0610010K14Rik	170.42	155.77	-1.09
ENSMUSG00000025731	0610011F06Rik	67.61	50.94	-1.33
ENSMUSG00000058706	0610030E20Rik	24.42	18.62	-1.31
ENSMUSG00000028608	0610037L13Rik	136.58	136.96	1
ENSMUSG00000060512	0610040J01Rik	14.95	2.73	-5.48
ENSMUSG00000019689	1110001J03Rik	44.69	48.41	1.08
ENSMUSG00000090066	1110002E22Rik	0.06	0.07	1.17
ENSMUSG00000022972	1110004E09Rik	55.98	45.3	-1.24
ENSMUSG00000030663	1110004F10Rik	108.7	101.72	-1.07
ENSMUSG00000037960	1110007C09Rik	40.62	50.24	1.24
ENSMUSG00000027637	1110008F13Rik	125.13	142.02	1.13
ENSMUSG00000021023	1110008L16Rik	20.94	23.23	1.11
ENSMUSG00000039195	1110008P14Rik	46.34	72.88	1.57
ENSMUSG00000045237	1110012L19Rik	29.28	26.52	-1.1
ENSMUSG00000028441	1110017D15Rik	0.34	1.22	3.59
ENSMUSG00000068073	1110025L11Rik	0	0	0
ENSMUSG00000037971	1110032A03Rik	36.29	38.06	1.05
ENSMUSG00000046999	1110032F04Rik	0.25	0.08	-3.13
ENSMUSG00000044991	1110034G24Rik	8.45	10.79	1.28
ENSMUSG00000040720	1110037F02Rik	21.28	20.56	-1.04
ENSMUSG00000063236	1110038F14Rik	53.03	55.71	1.05
ENSMUSG00000040591	1110051M20Rik	50	27.08	-1.85
ENSMUSG00000037669	1110057K04Rik	25.68	25.16	-1.02
ENSMUSG00000068067	1110057P08Rik	0	0	0
ENSMUSG00000026154	1110058L19Rik	25.96	25.93	-1
ENSMUSG00000035171	1110059E24Rik	28.24	24.76	-1.14
ENSMUSG00000032551	1110059G10Rik	30.06	26.53	-1.13
ENSMUSG00000078570	1110065P20Rik	39.35	37.65	-1.05
ENSMUSG00000045414	1190002N15Rik	23.03	29.41	1.28
ENSMUSG00000096537	1190003K10Rik	0.03	0	0
ENSMUSG00000043687	1190005I06Rik	1.16	2.05	1.77
ENSMUSG00000063320	1190007I07Rik	15.61	14.52	-1.08
ENSMUSG00000020783	1200014J11Rik	36.43	34.94	-1.04
ENSMUSG00000033688	1300017J02Rik	0.17	0	0
ENSMUSG00000068099	1500009C09Rik	0.07	0.08	1.14
ENSMUSG00000087651	1500009L16Rik	3.72	0.86	-4.33
ENSMUSG00000072694	1500011B03Rik	50.36	39.93	-1.26
ENSMUSG00000051319	1500011K16Rik	29.23	34.79	1.19
ENSMUSG00000026051	1500015O10Rik	1.92	0	-2
ENSMUSG00000043747	1520401A03Rik	0.32	0.72	2.25
ENSMUSG00000024118	1600002H07Rik	10.87	10.71	-1.01
ENSMUSG00000035595	1600002K03Rik	23.37	19.82	-1.18
ENSMUSG00000050088	1600012H06Rik	21.34	23.42	1.1
ENSMUSG00000054676	1600014C10Rik	16.87	18.81	1.11
ENSMUSG00000094690	1600014C23Rik	0	0.1	0
ENSMUSG00000035491	1600014K23Rik	0.05	0	0
ENSMUSG00000029813	1600015I10Rik	0	0	0
ENSMUSG00000046242	1600029I14Rik	0	0	0
ENSMUSG00000029182	1700001C02Rik	0.12	0.08	-1.5
ENSMUSG00000047150	1700001C19Rik	0.55	0.54	-1.02
ENSMUSG00000095384	1700001F09Rik	0	0	0
ENSMUSG00000095040	1700001J03Rik	0.1	0.21	2.1
ENSMUSG00000056508	1700001K19Rik	0.04	0	0
ENSMUSG00000021534	1700001L19Rik	0.14	0.09	-1.56
ENSMUSG00000044320	1700001O22Rik	11.91	4.35	-2.74
ENSMUSG00000018543	1700001P01Rik	2.31	1.25	-1.85
ENSMUSG00000030030	1700003E16Rik	0.58	0.94	1.62
ENSMUSG00000038523	1700003F12Rik	0.25	0.31	1.24
ENSMUSG00000039174	1700003H04Rik	0	0.08	0
ENSMUSG00000028294	1700003M02Rik	0.14	0.23	1.64
ENSMUSG00000027973	1700006A11Rik	0	0	0
ENSMUSG00000010841	1700006E09Rik	0	0	0
ENSMUSG00000031620	1700007B14Rik	0.03	0	0
ENSMUSG00000057816	1700007G11Rik	0.44	0.3	-1.47
ENSMUSG00000030858	1700007K09Rik	0.76	1.49	1.96
ENSMUSG00000026831	1700007K13Rik	3.97	4.77	1.2
ENSMUSG00000056018	1700008F21Rik	0	0	0
ENSMUSG00000058252	1700008I05Rik	0	0	0
ENSMUSG00000008028	1700008O03Rik	1.59	1.32	-1.2
ENSMUSG00000069118	1700008P02Rik	0	0.05	0
ENSMUSG00000028287	1700009N14Rik	0	0.07	0
ENSMUSG00000026649	1700009P17Rik	1.05	1.4	1.33
ENSMUSG00000057047	1700010B08Rik	0.09	0	0
ENSMUSG00000023873	1700010I14Rik	0.36	0.45	1.25
ENSMUSG00000063971	1700011A15Rik	0.27	0.69	2.56
ENSMUSG00000036557	1700011E24Rik	0.14	0.16	1.14
ENSMUSG00000021850	1700011H14Rik	0.05	0	0
ENSMUSG00000058925	1700011I03Rik	0.05	0.14	2.8
ENSMUSG00000031682	1700011L22Rik	1.62	0.08	-20.25
ENSMUSG00000079476	1700011M02Rik	0	0	0
ENSMUSG00000029766	1700012A03Rik	0	0	0
ENSMUSG00000020617	1700012B07Rik	0	0	0
ENSMUSG00000031927	1700012B09Rik	0	0	0
ENSMUSG00000100200	1700012L04Rik	0	0.11	0
ENSMUSG00000028589	1700012P22Rik	0	0	0
ENSMUSG00000027886	1700013F07Rik	0.07	0	0
ENSMUSG00000041399	1700013G24Rik	0	0	0
ENSMUSG00000054727	1700013H16Rik	0	0	0
ENSMUSG00000051054	1700014D04Rik	0.17	0.18	1.06
ENSMUSG00000042800	1700015E13Rik	0	0	0
ENSMUSG00000079666	1700015F17Rik	0	0.66	1
ENSMUSG00000094445	1700015G11Rik	0	0	0
ENSMUSG00000015962	1700016C15Rik	0.28	0.85	3.04
ENSMUSG00000031509	1700016D06Rik	0	0	0
ENSMUSG00000085861	1700016G14Rik	0	0	0
ENSMUSG00000029320	1700016H13Rik	0.43	0.61	1.42
ENSMUSG00000053783	1700016K19Rik	0.22	0.05	-4.4
ENSMUSG00000032300	1700017B05Rik	9.91	9.05	-1.1
ENSMUSG00000024729	1700017D01Rik	0	0	0
ENSMUSG00000056912	1700017N19Rik	0	0	0
ENSMUSG00000031809	1700018B08Rik	0.15	0.21	1.4
ENSMUSG00000058935	1700018C11Rik	0	0.07	0
ENSMUSG00000029620	1700018F24Rik	0	0	0
ENSMUSG00000060715	1700019A02Rik	0.06	0.07	1.17
ENSMUSG00000040340	1700019B03Rik	0.14	0.34	2.43
ENSMUSG00000043629	1700019D03Rik	0.45	1.27	2.82
ENSMUSG00000068299	1700019G17Rik	1.3	1.67	1.28
ENSMUSG00000038987	1700019L03Rik	0.02	0.06	3
ENSMUSG00000026931	1700019N19Rik	0.04	0	0
ENSMUSG00000036574	1700019O17Rik	0.02	0.07	3.5
ENSMUSG00000027409	1700020A23Rik	0	0	0
ENSMUSG00000100937	1700020D05Rik	0.03	0.26	8.67
ENSMUSG00000035085	1700020L24Rik	0	0.47	0
ENSMUSG00000050844	1700020N01Rik	0.11	0	0
ENSMUSG00000059690	1700020N15Rik	0	0	0
ENSMUSG00000019797	1700021F05Rik	50.52	44.55	-1.13
ENSMUSG00000027518	1700021F07Rik	0	0	0
ENSMUSG00000035629	1700021K19Rik	29.29	26.76	-1.09
ENSMUSG00000028451	1700022I11Rik	0	0.02	0
ENSMUSG00000029248	1700023E05Rik	0.98	0.36	-2.72
ENSMUSG00000020940	1700023F06Rik	3.59	2.24	-1.6
ENSMUSG00000052334	1700024B05Rik	0	0	0
ENSMUSG00000072473	1700024G13Rik	0	0	0
ENSMUSG00000045022	1700024P04Rik	0	0	0
ENSMUSG00000078612	1700024P16Rik	0.4	0.45	1.12
ENSMUSG00000101113	1700025B11Rik	0	0	0
ENSMUSG00000078935	1700025C18Rik	0	0	0
ENSMUSG00000024728	1700025F22Rik	0	0	0
ENSMUSG00000032666	1700025G04Rik	87.45	98.72	1.13
ENSMUSG00000011154	1700026D08Rik	0.02	0	0
ENSMUSG00000026809	1700026L06Rik	0.07	0	0
ENSMUSG00000038782	1700028J19Rik	1.44	1.1	-1.31
ENSMUSG00000089798	1700028K03Rik	0.02	0	0
ENSMUSG00000033053	1700028P14Rik	0	0	0
ENSMUSG00000052075	1700029F12Rik	0	0	0
ENSMUSG00000031452	1700029H14Rik	0.13	0.17	1.31
ENSMUSG00000044916	1700029I15Rik	7.15	5.34	-1.34
ENSMUSG00000071103	1700029J07Rik	2.75	2.72	-1.01
ENSMUSG00000061633	1700029P11Rik	0	0	0
ENSMUSG00000031847	1700030J22Rik	0.78	0.58	-1.34
ENSMUSG00000052794	1700030K09Rik	26.17	25.29	-1.03
ENSMUSG00000032894	1700031F05Rik	0	0	0
ENSMUSG00000024532	1700034E13Rik	0	0	0
ENSMUSG00000074619	1700034I23Rik	0	0	0
ENSMUSG00000040163	1700034J05Rik	0.02	0	0
ENSMUSG00000029867	1700034O15Rik	0.06	0	0
ENSMUSG00000005983	1700037C18Rik	5.73	6.66	1.16
ENSMUSG00000027327	1700037H04Rik	32.64	33.25	1.02
ENSMUSG00000070568	1700039E15Rik	0	0	0
ENSMUSG00000019945	1700040L02Rik	2.51	0.96	-2.61
ENSMUSG00000057402	1700042B14Rik	0	0	0
ENSMUSG00000078593	1700042G07Rik	0	0	0
ENSMUSG00000094103	1700047I17Rik2	0	0.06	0
ENSMUSG00000079271	1700049E17Rik1	0	0	0
ENSMUSG00000070709	1700049G17Rik	3.49	3.42	-1.02
ENSMUSG00000061759	1700052N19Rik	14.04	14.03	-1
ENSMUSG00000037263	1700055N04Rik	1.08	0.99	-1.09
ENSMUSG00000044854	1700056E22Rik	0.98	1.09	1.11
ENSMUSG00000074139	1700057G04Rik	0	0.07	0
ENSMUSG00000024209	1700061G19Rik	0.09	0.31	3.44
ENSMUSG00000082766	1700064H15Rik	0.87	0.32	-2.72
ENSMUSG00000073598	1700066B19Rik	0.08	0.05	-1.6
ENSMUSG00000038323	1700066M21Rik	4.1	4.04	-1.01
ENSMUSG00000046408	1700067K01Rik	1.02	1.37	1.34
ENSMUSG00000021545	1700067P10Rik	0	0	0
ENSMUSG00000042184	1700069L16Rik	0	0	0
ENSMUSG00000029883	1700074P13Rik	0	0	0
ENSMUSG00000032566	1700080E11Rik	0.06	0	0
ENSMUSG00000031118	1700080O16Rik	0	0.03	0
ENSMUSG00000070532	1700084C01Rik	0.1	0.02	-5
ENSMUSG00000057805	1700084M14Rik	0	0	0
ENSMUSG00000020548	1700086D15Rik	0.28	0	0
ENSMUSG00000033029	1700088E04Rik	3.53	6.49	1.84
ENSMUSG00000090840	1700092M07Rik	5.98	3.81	-1.57
ENSMUSG00000020286	1700093K21Rik	0.51	0.54	1.06
ENSMUSG00000079502	1700101E01Rik	0.96	1.06	1.1
ENSMUSG00000032611	1700102P08Rik	1.7	2.47	1.45
ENSMUSG00000034031	1700106J16Rik	0.03	0	0
ENSMUSG00000098681	1700106J16Rik	0	0	0
ENSMUSG00000008307	1700109H08Rik	14.24	7.67	-1.86
ENSMUSG00000063458	1700112E06Rik	0.69	0.26	-2.65
ENSMUSG00000047129	1700113H08Rik	0	0	0
ENSMUSG00000094928	1700122O11Rik	0	0	0
ENSMUSG00000024786	1700123I01Rik	0.63	0.14	-4.5
ENSMUSG00000029526	1700123K08Rik	0	0.04	0
ENSMUSG00000072878	1700123L14Rik	0.02	0	0
ENSMUSG00000040822	1700123O20Rik	28.23	31.06	1.1
ENSMUSG00000018479	1700125H20Rik	0.06	0.38	6.33
ENSMUSG00000021977	1700129C05Rik	0	0	0
ENSMUSG00000071653	1810009A15Rik	32.11	40.99	1.28
ENSMUSG00000094808	1810009J06Rik	0	0	0
ENSMUSG00000078607	1810010H24Rik	3.8	2.93	-1.3
ENSMUSG00000041707	1810011H11Rik	0	0	0
ENSMUSG00000056313	1810011O10Rik	42.46	76.8	1.81
ENSMUSG00000022507	1810013L24Rik	21.5	31.14	1.45
ENSMUSG00000078784	1810022K09Rik	177.21	153.08	-1.16
ENSMUSG00000044145	1810024B03Rik	1.42	1	-1.42
ENSMUSG00000048429	1810026J23Rik	29.21	29.4	1.01
ENSMUSG00000044148	1810030O07Rik	25.8	26.78	1.04
ENSMUSG00000020812	1810032O08Rik	47.88	29.25	-1.64
ENSMUSG00000054091	1810037I17Rik	95.02	149.08	1.57
ENSMUSG00000062760	1810041L15Rik	2.14	2.71	1.27
ENSMUSG00000020284	1810043G02Rik	22.59	18.98	-1.19
ENSMUSG00000078572	1810043H04Rik	56.21	68.81	1.22
ENSMUSG00000036027	1810046K07Rik	0	0.28	0
ENSMUSG00000097221	1810049J17Rik	2.78	2.26	-1.23
ENSMUSG00000035372	1810055G02Rik	42.37	38.4	-1.1
ENSMUSG00000027713	1810062G17Rik	2.12	1.15	-1.84
ENSMUSG00000013653	1810065E05Rik	0.04	0	0
ENSMUSG00000039339	2010001E11Rik	0.01	0	0
ENSMUSG00000067297	2010002M12Rik	0.05	0.04	-1.25
ENSMUSG00000042041	2010003K11Rik	0	0.1	0
ENSMUSG00000095620	2010005H15Rik	0.83	1.15	1.39
ENSMUSG00000062376	2010012O05Rik	13.54	14.26	1.05
ENSMUSG00000025528	2010106E10Rik	0.12	0.14	1.17
ENSMUSG00000021290	2010107E04Rik	348.47	386.93	1.11
ENSMUSG00000029847	2010107G12Rik	4.42	6.55	1.48
ENSMUSG00000020083	2010107G23Rik	24.22	35.66	1.47
ENSMUSG00000029384	2010109A12Rik	0	0	0
ENSMUSG00000063522	2010109I03Rik	1.01	3.15	3.12
ENSMUSG00000021458	2010111I01Rik	132.48	73.59	-1.8
ENSMUSG00000026090	2010300C02Rik	63.79	52.35	-1.22
ENSMUSG00000074829	2010315B03Rik	13.75	12.99	-1.06
ENSMUSG00000030587	2200002D01Rik	22.17	40.65	1.83
ENSMUSG00000013083	2200002J24Rik	0	1.11	1
ENSMUSG00000029882	2210010C04Rik	0	0	0
ENSMUSG00000074217	2210011C24Rik	5.61	3.81	-1.47
ENSMUSG00000086316	2210013O21Rik	59.96	51.28	-1.17
ENSMUSG00000021550	2210016F16Rik	16.14	19.33	1.2
ENSMUSG00000029559	2210016L21Rik	41.7	32.92	-1.27
ENSMUSG00000103523	2210017I01Rik	0.09	0	0
ENSMUSG00000035401	2210018M11Rik	19.8	16.75	-1.18
ENSMUSG00000078546	2210404O09Rik	6.68	6.07	-1.1
ENSMUSG00000037145	2210407C18Rik	3.72	0.55	-6.76
ENSMUSG00000071252	2210408I21Rik	2.18	1.98	-1.1
ENSMUSG00000078894	2210418O10Rik	0.17	0.01	-17
ENSMUSG00000039269	2300002M23Rik	7.42	7.42	0
ENSMUSG00000078257	2300003K06Rik	0	0	0
ENSMUSG00000075605	2300005B03Rik	5.77	4.42	-1.31
ENSMUSG00000032403	2300009A05Rik	26.62	19.85	-1.34
ENSMUSG00000028396	2310002L09Rik	0.07	0	0
ENSMUSG00000025384	2310003H01Rik	41.06	37.61	-1.09
ENSMUSG00000007457	2310003L06Rik	0	0	0
ENSMUSG00000034159	2310007B03Rik	6.05	9.4	1.55
ENSMUSG00000009210	2310007L24Rik	2.95	2.63	-1.12
ENSMUSG00000079283	2310009B15Rik	15.74	16.39	1.04
ENSMUSG00000020133	2310011J03Rik	32.65	35.8	1.1
ENSMUSG00000033967	2310014L17Rik	5.84	5.52	-1.06
ENSMUSG00000019933	2310015B20Rik	2.85	2.25	-1.27
ENSMUSG00000049643	2310022A10Rik	44.8	40.1	-1.12
ENSMUSG00000031983	2310022B05Rik	44.87	61.25	1.37
ENSMUSG00000032062	2310030G06Rik	7.97	8.79	1.1
ENSMUSG00000020441	2310033P09Rik	23.92	24.92	1.04
ENSMUSG00000068078	2310034C09Rik	5	0.25	-20
ENSMUSG00000099655	2310034G01Rik	0.31	0.82	2.65
ENSMUSG00000026319	2310035C23Rik	43.96	50.62	1.15
ENSMUSG00000041203	2310036O22Rik	234.09	233.28	-1
ENSMUSG00000062619	2310039H08Rik	37.29	39.46	1.06
ENSMUSG00000002345	2310045N01Rik	93.69	99.06	1.06
ENSMUSG00000045176	2310047M10Rik	18.85	23.56	1.25
ENSMUSG00000090314	2310050C09Rik	0.29	0.07	-4.14
ENSMUSG00000015519	2310057J18Rik	0	0	0
ENSMUSG00000040177	2310057M21Rik	7.92	12.21	1.54
ENSMUSG00000048830	2310057N15Rik	1.15	0	-1
ENSMUSG00000050705	2310061I04Rik	68.53	46.82	-1.46
ENSMUSG00000050704	2310061N02Rik	1.46	0.05	-29.2
ENSMUSG00000020747	2310067B10Rik	52.09	55.89	1.07
ENSMUSG00000045331	2310079G19Rik	21.68	1.14	-19.02
ENSMUSG00000045411	2410002F23Rik	147.04	116.33	-1.26
ENSMUSG00000036873	2410004B18Rik	65.37	65.74	1.01
ENSMUSG00000071398	2410004P03Rik	0.36	0.36	0
ENSMUSG00000090470	2410012M07Rik	0	0.05	0
ENSMUSG00000049760	2410015M20Rik	140.2	151.98	1.08
ENSMUSG00000046791	2410016O06Rik	9.52	10.69	1.12
ENSMUSG00000039801	2410089E03Rik	8.69	7.39	-1.18
ENSMUSG00000024726	2410127L17Rik	2.24	2.18	-1.03
ENSMUSG00000032840	2410131K14Rik	8.51	8.57	1.01
ENSMUSG00000064308	2410137M14Rik	0	0	0
ENSMUSG00000074832	2410141K09Rik	0	0	0
ENSMUSG00000071632	2510002D24Rik	48.12	52.41	1.09
ENSMUSG00000036955	2510003E04Rik	28.09	30.36	1.08
ENSMUSG00000043391	2510009E07Rik	18.08	11.45	-1.58
ENSMUSG00000044496	2510039O18Rik	51.01	60.75	1.19
ENSMUSG00000052419	2610001J05Rik	50.48	79.2	1.57
ENSMUSG00000073684	2610002J02Rik	49.96	51.72	1.04
ENSMUSG00000031242	2610002M06Rik	6.51	7.85	1.21
ENSMUSG00000060301	2610008E11Rik	8.73	7.4	-1.18
ENSMUSG00000022701	2610015P09Rik	29.08	37.38	1.29
ENSMUSG00000030924	2610020H08Rik	30.87	24.86	-1.24
ENSMUSG00000091474	2610021A01Rik	6.09	5.11	-1.19
ENSMUSG00000009114	2610028H24Rik	0.05	0.09	1.8
ENSMUSG00000039043	2610034B18Rik	39.35	43.01	1.09
ENSMUSG00000024227	2610034M16Rik	0	0.01	0
ENSMUSG00000079388	2610042L04Rik	0.35	0.26	-1.35
ENSMUSG00000071302	2610044O15Rik8	12.68	9.54	-1.33
ENSMUSG00000059482	2610301B20Rik	18.61	17.31	-1.08
ENSMUSG00000066000	2610305D13Rik	0.17	0.16	-1.06
ENSMUSG00000049916	2610318N02Rik	1.71	1.98	1.16
ENSMUSG00000010277	2610507B11Rik	104.14	120.18	1.15
ENSMUSG00000096001	2610528A11Rik	801.28	1948.48	2.43
ENSMUSG00000028536	2610528J11Rik	13.9	35.05	2.52
ENSMUSG00000038005	2700029M09Rik	61.89	64.55	1.04
ENSMUSG00000034601	2700049A03Rik	10.9	10.47	-1.04
ENSMUSG00000021807	2700060E02Rik	55.46	47.89	-1.16
ENSMUSG00000024273	2700062C07Rik	13.66	14.84	1.09
ENSMUSG00000053080	2700081O15Rik	40.77	42.38	1.04
ENSMUSG00000072704	2700089E24Rik	84.43	77.11	-1.09
ENSMUSG00000076437	2700094K13Rik	1528.54	1318.79	-1.16
ENSMUSG00000062198	2700097O09Rik	12.02	10.5	-1.14
ENSMUSG00000031984	2810004N23Rik	40.05	32.9	-1.22
ENSMUSG00000047635	2810006K23Rik	7.83	7.75	-1.01
ENSMUSG00000030378	2810007J24Rik	0	0	0
ENSMUSG00000020491	2810021J22Rik	3.21	2.75	-1.17
ENSMUSG00000028060	2810403A07Rik	81.41	72.6	-1.12
ENSMUSG00000018570	2810408A11Rik	30.5	26.94	-1.13
ENSMUSG00000039725	2810408M09Rik	10.36	7.51	-1.38
ENSMUSG00000040204	2810417H13Rik	26.83	23.44	-1.14
ENSMUSG00000058833	2810428I15Rik	71.75	56.58	-1.27
ENSMUSG00000026227	2810459M11Rik	0.01	0.01	0
ENSMUSG00000032712	2810474O19Rik	16.75	17.53	1.05
ENSMUSG00000044117	2900011O08Rik	0.11	0.13	1.18
ENSMUSG00000051339	2900026A02Rik	71.93	78.75	1.09
ENSMUSG00000071860	2900055J20Rik	0.9	0.21	-4.29
ENSMUSG00000030385	2900092C05Rik	0	0	0
ENSMUSG00000020381	3010026O09Rik	9.83	12.05	1.23
ENSMUSG00000051219	3100002H09Rik	0	0	0
ENSMUSG00000079737	3110001I22Rik	4.37	3.81	-1.15
ENSMUSG00000024410	3110002H16Rik	68.2	81.61	1.2
ENSMUSG00000079450	3110007F17Rik	0.24	0.28	1.17
ENSMUSG00000026388	3110009E18Rik	16.61	12	-1.38
ENSMUSG00000060375	3110018I06Rik	0	0	0
ENSMUSG00000094958	3110021N24Rik	0.45	0.12	-3.75
ENSMUSG00000067879	3110035E14Rik	0.18	0.05	-3.6
ENSMUSG00000089922	3110039M20Rik	0	0	0
ENSMUSG00000025102	3110040N11Rik	60.45	59.34	-1.02
ENSMUSG00000028300	3110043O21Rik	7.4	10.9	1.47
ENSMUSG00000035868	3110052M02Rik	4.37	4.01	-1.09
ENSMUSG00000037818	3110057O12Rik	3.43	2.55	-1.35
ENSMUSG00000046806	3110062M04Rik	7.26	6.75	-1.08
ENSMUSG00000074635	3110070M22Rik	0.24	0.27	1.13
ENSMUSG00000026258	3110079O15Rik	0.11	0.13	1.18
ENSMUSG00000053553	3110082I17Rik	16.78	13.53	-1.24
ENSMUSG00000086815	3110082J24Rik	0	0	0
ENSMUSG00000063364	3300002I08Rik	0.88	1.02	1.16
ENSMUSG00000071540	3425401B19Rik	0.02	0.01	-2
ENSMUSG00000036242	3632451O06Rik	3.37	7.88	2.34
ENSMUSG00000031125	3830403N18Rik	0.11	0	0
ENSMUSG00000033111	3830406C13Rik	11.15	12.75	1.14
ENSMUSG00000031179	3830417A13Rik	0.06	0	0
ENSMUSG00000064202	4430402I18Rik	0.38	0.5	1.32
ENSMUSG00000020101	4632428N05Rik	0.43	1.14	2.65
ENSMUSG00000048699	4732456N10Rik	0.75	1.86	2.48
ENSMUSG00000024481	4833403I15Rik	0.44	0.27	-1.63
ENSMUSG00000062822	4833420G17Rik	35.4	27.2	-1.3
ENSMUSG00000075217	4833423E24Rik	110.91	78.82	-1.41
ENSMUSG00000032057	4833427G06Rik	0	0	0
ENSMUSG00000025871	4833439L19Rik	64.51	61.85	-1.04
ENSMUSG00000023350	4921501E09Rik	0.02	0	0
ENSMUSG00000026734	4921504E06Rik	0.04	0	0
ENSMUSG00000029828	4921507P07Rik	0.71	0.68	-1.04
ENSMUSG00000061525	4921509C19Rik	0	0	0
ENSMUSG00000049815	4921511C20Rik	0	0	0
ENSMUSG00000040514	4921511H03Rik	0	0	0
ENSMUSG00000094577	4921511M17Rik	0	0	0
ENSMUSG00000049902	4921517D22Rik	0	0	0
ENSMUSG00000036934	4921524J17Rik	9.7	9.61	-1.01
ENSMUSG00000039540	4921524L21Rik	0	0	0
ENSMUSG00000034689	4921530L21Rik	0	0	0
ENSMUSG00000020434	4921536K21Rik	0.49	0.43	-1.14
ENSMUSG00000028520	4921539E11Rik	0	0	0
ENSMUSG00000047720	4922502D21Rik	0	0	0
ENSMUSG00000079421	4930402F06Rik	0.03	0	0
ENSMUSG00000027309	4930402H24Rik	15.19	11.75	-1.29
ENSMUSG00000045797	4930402K13Rik	0	0	0
ENSMUSG00000020332	4930404A10Rik	0	0	0
ENSMUSG00000079001	4930404H24Rik	0	0	0
ENSMUSG00000020234	4930404N11Rik	0.3	0.52	1.73
ENSMUSG00000075524	4930407I10Rik	0.01	0.01	0
ENSMUSG00000043569	4930412D23Rik	0	0	0
ENSMUSG00000025783	4930412O13Rik	0	0.04	0
ENSMUSG00000020191	4930415F15Rik	1.64	2.14	1.3
ENSMUSG00000035387	4930415L06Rik	0	0	0
ENSMUSG00000022993	4930415O20Rik	0.34	0.61	1.79
ENSMUSG00000026736	4930426L09Rik	0.02	0.03	1.5
ENSMUSG00000037466	4930427A07Rik	16.32	16.61	1.02
ENSMUSG00000073085	4930428D18Rik	0	0	0
ENSMUSG00000027157	4930430A15Rik	0	0	0
ENSMUSG00000046567	4930430F08Rik	6.9	8.15	1.18
ENSMUSG00000008129	4930432K21Rik	0.39	1.09	2.79
ENSMUSG00000074248	4930432M17Rik	0	0	0
ENSMUSG00000091692	4930433I11Rik	0	0	0
ENSMUSG00000022798	4930435E12Rik	0	0	0
ENSMUSG00000069873	4930438A08Rik	2.49	0.84	-2.96
ENSMUSG00000053603	4930442H23Rik	0	0.03	0
ENSMUSG00000069712	4930444G20Rik	0	0.06	0
ENSMUSG00000067795	4930444P10Rik	0.04	0.23	5.75
ENSMUSG00000022288	4930447A16Rik	0	0	0
ENSMUSG00000021098	4930447C04Rik	2.69	2.42	-1.11
ENSMUSG00000031182	4930447F04Rik	0	0	0
ENSMUSG00000079093	4930449I24Rik	0	0	0
ENSMUSG00000045989	4930451I11Rik	0	0	0
ENSMUSG00000021747	4930452B06Rik	3.49	7.19	2.06
ENSMUSG00000059920	4930453N24Rik	18.69	16.58	-1.13
ENSMUSG00000080907	4930455H04Rik	0	0	0
ENSMUSG00000096265	4930467E23Rik	0	0	0
ENSMUSG00000079525	4930468A15Rik	0	0	0
ENSMUSG00000049160	4930469G21Rik	0	0	0
ENSMUSG00000085684	4930469K13Rik	0.96	0	-1
ENSMUSG00000043583	4930470P17Rik	0	0	0
ENSMUSG00000096405	4930474N05Rik	0	0	0
ENSMUSG00000035651	4930480E11Rik	0	0	0
ENSMUSG00000050345	4930486L24Rik	0	0.03	0
ENSMUSG00000055555	4930502E18Rik	0	0.03	0
ENSMUSG00000090202	4930503B20Rik	0	0.04	0
ENSMUSG00000072595	4930503E14Rik	0	0	0
ENSMUSG00000044906	4930503L19Rik	3.14	1.82	-1.73
ENSMUSG00000052642	4930504O13Rik	0	0	0
ENSMUSG00000040919	4930505A04Rik	0.04	0	0
ENSMUSG00000041362	4930506M07Rik	34.56	31.84	-1.09
ENSMUSG00000097129	4930507D05Rik	0.17	0.2	1.18
ENSMUSG00000062511	4930512M02Rik	0	0	0
ENSMUSG00000031270	4930513O06Rik	0	0	0
ENSMUSG00000090219	4930516K23Rik	0	0	0
ENSMUSG00000074629	4930518I15Rik	0.82	0.55	-1.49
ENSMUSG00000029564	4930519G04Rik	0	0.02	0
ENSMUSG00000097602	4930519P11Rik	0.28	0.1	-2.8
ENSMUSG00000060491	4930522H14Rik	0	0	0
ENSMUSG00000072762	4930522L14Rik	4.39	4.89	1.11
ENSMUSG00000090394	4930523C07Rik	43.33	56.65	1.31
ENSMUSG00000020299	4930524B15Rik	0.02	0	0
ENSMUSG00000035364	4930524J08Rik	3.27	2.4	-1.36
ENSMUSG00000059663	4930524N10Rik	0	0	0
ENSMUSG00000096969	4930535I16Rik	0	0.1	0
ENSMUSG00000028642	4930538K18Rik	0.27	0.51	1.89
ENSMUSG00000048905	4930539E08Rik	0.13	0.06	-2.17
ENSMUSG00000087279	4930544D05Rik	0.79	0.22	-3.59
ENSMUSG00000036463	4930544G11Rik	0	0	0
ENSMUSG00000024546	4930546C10Rik	0	0	0
ENSMUSG00000029138	4930548H24Rik	0.15	0.18	1.2
ENSMUSG00000036921	4930549C01Rik	0	0	0
ENSMUSG00000005131	4930550C14Rik	0.51	0.61	1.2
ENSMUSG00000046180	4930550L24Rik	0	0	0
ENSMUSG00000096197	4930555G01Rik	0	0	0
ENSMUSG00000034493	4930556J24Rik	0	0	0
ENSMUSG00000048994	4930557A04Rik	0	0	0
ENSMUSG00000086277	4930558K02Rik	0	0	0
ENSMUSG00000022518	4930562C15Rik	0	0	0
ENSMUSG00000051728	4930563D23Rik	0.01	0	0
ENSMUSG00000022002	4930564B18Rik	0	0	0
ENSMUSG00000051788	4930564D02Rik	0	0	0
ENSMUSG00000026882	4930568D16Rik	0	0	0
ENSMUSG00000069720	4930572O03Rik	0	0	0
ENSMUSG00000037358	4930578C19Rik	0.04	0.1	2.5
ENSMUSG00000054885	4930578G10Rik	0	0	0
ENSMUSG00000021961	4930578I06Rik	0	0	0
ENSMUSG00000012042	4930579F01Rik	0	0.02	0
ENSMUSG00000027811	4930579G24Rik	10.35	11.46	1.11
ENSMUSG00000024088	4930583I09Rik	0	0	0
ENSMUSG00000034063	4930590J08Rik	0.16	0.09	-1.78
ENSMUSG00000083193	4930595D18Rik	0	0	0
ENSMUSG00000060673	4930595M18Rik	0	0	0
ENSMUSG00000041068	4930596D02Rik	0	0	0
ENSMUSG00000031194	4931400O07Rik	0	0	0
ENSMUSG00000013353	4931406B18Rik	0.01	0	0
ENSMUSG00000031938	4931406C07Rik	8.75	8.54	-1.02
ENSMUSG00000066571	4931406P16Rik	29.57	27.78	-1.06
ENSMUSG00000073722	4931408C20Rik	0.01	0	0
ENSMUSG00000038199	4931409K22Rik	0	0.03	0
ENSMUSG00000022179	4931414P19Rik	5.82	6.98	1.2
ENSMUSG00000056197	4931417E11Rik	0	0.03	0
ENSMUSG00000046085	4931422A03Rik	0	0	0
ENSMUSG00000026774	4931423N10Rik	0.08	0.09	1.13
ENSMUSG00000014837	4931428F04Rik	9.64	11.39	1.18
ENSMUSG00000086727	4931428L18Rik	0	0	0
ENSMUSG00000032023	4931429I11Rik	0.22	0.12	-1.83
ENSMUSG00000056617	4931429L15Rik	0	0	0
ENSMUSG00000055643	4931431F19Rik	0	0	0
ENSMUSG00000078157	4931440F15Rik	0.07	0.09	1.29
ENSMUSG00000058670	4932411N23Rik	0	0	0
ENSMUSG00000079324	4932414N04Rik	0	0	0
ENSMUSG00000044581	4932415D10Rik	0	0	0
ENSMUSG00000048038	4932418E24Rik	0.2	1.52	7.6
ENSMUSG00000079513	4932429P05Rik	0	0	0
ENSMUSG00000037270	4932438A13Rik	23.54	23.09	-1.02
ENSMUSG00000039851	4932438H23Rik	0.07	0.16	2.29
ENSMUSG00000043549	4932442L08Rik	0	0.02	0
ENSMUSG00000090336	4932443I19Rik	0.05	0.13	2.6
ENSMUSG00000055357	4933400A11Rik	0	0	0
ENSMUSG00000025961	4933402D24Rik	0.02	0	0
ENSMUSG00000045330	4933402E13Rik	0.13	0.06	-2.17
ENSMUSG00000069971	4933402J07Rik	0	0	0
ENSMUSG00000013668	4933402N03Rik	0	0	0
ENSMUSG00000067848	4933402N22Rik	0	0	0
ENSMUSG00000044084	4933402P03Rik	0	0.11	0
ENSMUSG00000075046	4933403O03Rik	0	0	0
ENSMUSG00000079460	4933403O08Rik	0	0	0
ENSMUSG00000013158	4933405L10Rik	0.03	0	0
ENSMUSG00000084234	4933405O20Rik	0.03	0.03	0
ENSMUSG00000027229	4933406J08Rik	0	0	0
ENSMUSG00000050526	4933406M09Rik	0	0.02	0
ENSMUSG00000026224	4933407L21Rik	0.31	0.37	1.19
ENSMUSG00000049357	4933408B17Rik	0.97	0.69	-1.41
ENSMUSG00000053896	4933409G03Rik	0.08	0	0
ENSMUSG00000094576	4933409K07RIK	0	0	0
ENSMUSG00000029586	4933411G11Rik	0	0	0
ENSMUSG00000090369	4933411K16Rik	0.21	0.19	-1.11
ENSMUSG00000071749	4933412E24Rik	0	0	0
ENSMUSG00000079304	4933413G19Rik	1.32	1.83	1.39
ENSMUSG00000072983	4933414I15Rik	0	0	0
ENSMUSG00000045877	4933415A04Rik	0.23	0.61	2.65
ENSMUSG00000073730	4933415F23Rik	0.02	0	0
ENSMUSG00000074734	4933416C03Rik	0	0	0
ENSMUSG00000021415	4933417A18Rik	0	0	0
ENSMUSG00000030463	4933421I07Rik	0	0	0
ENSMUSG00000070332	4933422H20Rik	0	0	0
ENSMUSG00000021718	4933425L06Rik	0	0	0
ENSMUSG00000021133	4933426M11Rik	39.66	46.25	1.17
ENSMUSG00000020807	4933427D14Rik	22.57	17.18	-1.31
ENSMUSG00000030877	4933427G17Rik	0.26	0.5	1.92
ENSMUSG00000073761	4933427I04Rik	0	0.02	0
ENSMUSG00000047988	4933428G20Rik	0.02	0.18	9
ENSMUSG00000042525	4933428M09Rik	0.04	0	0
ENSMUSG00000058046	4933430I17Rik	0.51	0.59	1.16
ENSMUSG00000036770	4933433C11Rik	0.75	1.09	1.45
ENSMUSG00000027942	4933434E20Rik	42.19	43.8	1.04
ENSMUSG00000025288	4933436I01Rik	0	0	0
ENSMUSG00000051940	5031410I06Rik	0	0	0
ENSMUSG00000034959	5031414D18Rik	0.47	0.26	-1.81
ENSMUSG00000036046	5031439G07Rik	51.37	35.99	-1.43
ENSMUSG00000040412	5330417C22Rik	0.15	0.21	1.4
ENSMUSG00000049740	5330417H12Rik	0	0	0
ENSMUSG00000094113	5430401F13Rik	0	0	0
ENSMUSG00000044121	5430402E10Rik	0	0	0
ENSMUSG00000072763	5430403G16Rik	1.24	1.32	1.06
ENSMUSG00000028475	5430416O09Rik	0.02	0.05	2.5
ENSMUSG00000006204	5430419D17Rik	0	0.01	0
ENSMUSG00000067613	5430421N21Rik	7.25	0.38	-19.08
ENSMUSG00000025058	5430427O19Rik	0	0.02	0
ENSMUSG00000052688	5430435G22Rik	71.48	92.05	1.29
ENSMUSG00000055594	5530400C23Rik	0	0	0
ENSMUSG00000020703	5530401A14Rik	0	0	0
ENSMUSG00000073755	5730409E04Rik	2.56	1.41	-1.82
ENSMUSG00000057181	5730455P16Rik	17.29	11.57	-1.49
ENSMUSG00000073197	5730507C01Rik	0.1	0.19	1.9
ENSMUSG00000050549	5730508B09Rik	19.32	31.12	1.61
ENSMUSG00000032985	5730522E02Rik	1.11	0.72	-1.54
ENSMUSG00000041605	5730559C18Rik	70.83	63.84	-1.11
ENSMUSG00000056468	5730596B20Rik	0.01	0	0
ENSMUSG00000054672	5830411N06Rik	0	0	0
ENSMUSG00000028331	5830415F09Rik	8.14	7.06	-1.15
ENSMUSG00000074733	5830428H23Rik	25.64	27.14	1.06
ENSMUSG00000070690	5830473C10Rik	0	0.02	0
ENSMUSG00000048544	5930422O12Rik	0	0	0
ENSMUSG00000075408	6030408B16Rik	0.21	0.04	-5.25
ENSMUSG00000066607	6030419C18Rik	6.4	1.78	-3.6
ENSMUSG00000066178	6030445D17Rik	0.02	0.02	0
ENSMUSG00000054069	6030452D12Rik	0	0	0
ENSMUSG00000022195	6030458C11Rik	19.01	16.53	-1.15
ENSMUSG00000025573	6030468B19Rik	0	0	0
ENSMUSG00000051361	6030498E09Rik	0	0	0
ENSMUSG00000053963	6330403A02Rik	0.13	0.17	1.31
ENSMUSG00000070814	6330408A02Rik	7.13	6.25	-1.14
ENSMUSG00000009551	6330409D20Rik	0.05	0	0
ENSMUSG00000045917	6330416G13Rik	9.35	5.66	-1.65
ENSMUSG00000054850	6330419J24Rik	0.35	0.88	2.51
ENSMUSG00000073795	6430531B16Rik	0.06	0.6	10
ENSMUSG00000074646	6430550D23Rik	0.92	0.62	-1.48
ENSMUSG00000037977	6430571L13Rik	1.48	2.43	1.64
ENSMUSG00000039620	6430573F11Rik	3.47	3.76	1.08
ENSMUSG00000034185	6430628N08Rik	0	0	0
ENSMUSG00000072066	6720489N17Rik	1.64	1.82	1.11
ENSMUSG00000032680	6820408C15Rik	0.15	0.32	2.13
ENSMUSG00000074123	7420426K07Rik	0	0	0
ENSMUSG00000091060	7420461P10Rik	0.16	0.18	1.13
ENSMUSG00000096607	7530416G11Rik	0	0	0
ENSMUSG00000027444	8030411F24Rik	0	0	0
ENSMUSG00000047466	8030462N17Rik	11.48	9.77	-1.18
ENSMUSG00000046774	8030474K03Rik	0.18	0.3	1.67
ENSMUSG00000048489	8430408G22Rik	54.18	46.32	-1.17
ENSMUSG00000030207	8430419L09Rik	6.92	7.94	1.15
ENSMUSG00000045008	9030612E09Rik	0.04	0.11	2.75
ENSMUSG00000021185	9030617O03Rik	4.93	4.46	-1.11
ENSMUSG00000073158	9030624G23Rik	0.63	0.58	-1.09
ENSMUSG00000030982	9030624J02Rik	59.01	62.76	1.06
ENSMUSG00000054951	9130008F23Rik	2.11	3.14	1.49
ENSMUSG00000039901	9130011E15Rik	17.08	18.97	1.11
ENSMUSG00000030823	9130019O22Rik	1.23	0.95	-1.29
ENSMUSG00000062944	9130023H24Rik	3.86	3.13	-1.23
ENSMUSG00000091175	9130204L05Rik	0	0	0
ENSMUSG00000097386	9130213A22Rik	0.14	0.25	1.79
ENSMUSG00000054598	9130230L23Rik	0.3	0.18	-1.67
ENSMUSG00000022362	9130401M01Rik	26.44	37.46	1.42
ENSMUSG00000101892	9130401M01Rik	46.88	42.52	-1.1
ENSMUSG00000038768	9130409I23Rik	0	0	0
ENSMUSG00000085683	9130409J20Rik	4.3	2.56	-1.68
ENSMUSG00000079602	9230102O04Rik	0	0	0
ENSMUSG00000027446	9230104L09Rik	0	0	0
ENSMUSG00000053070	9230110C19Rik	6.79	6.24	-1.09
ENSMUSG00000047980	9230110F15Rik	0	0	0
ENSMUSG00000021797	9230112D13Rik	0	0	0
ENSMUSG00000078934	9230113P08Rik	0	0	0
ENSMUSG00000004360	9330159F19Rik	0.2	0.05	-4
ENSMUSG00000055271	9330161L09Rik	1.08	0.89	-1.21
ENSMUSG00000056004	9330182L06Rik	0.72	0.66	-1.09
ENSMUSG00000094112	9330182O14Rik	0	0	0
ENSMUSG00000028593	9430007A20Rik	0	0	0
ENSMUSG00000059939	9430015G10Rik	38.82	39.24	1.01
ENSMUSG00000025971	9430016H08Rik	8.42	9.12	1.08
ENSMUSG00000033960	9430020K01Rik	3.51	3.48	-1.01
ENSMUSG00000040139	9430038I01Rik	13.68	13.69	1
ENSMUSG00000094447	9430069I07Rik	0.41	0	0
ENSMUSG00000075405	9430097D07Rik	0	0	0
ENSMUSG00000023263	9530002B09Rik	0	0	0
ENSMUSG00000020177	9530003J23Rik	0	0	0
ENSMUSG00000078776	9530053A07Rik	0.03	0.04	1.33
ENSMUSG00000036275	9530068E07Rik	219.22	182.65	-1.2
ENSMUSG00000036411	9530077C05Rik	0.85	0.78	-1.09
ENSMUSG00000038028	9630033F20Rik	9.49	6.83	-1.39
ENSMUSG00000057710	9630041A04Rik	0	0	0
ENSMUSG00000073386	9830107B12Rik	0	0	0
ENSMUSG00000074158	9830147E19Rik	1.69	1.18	-1.43
ENSMUSG00000044551	9930012K11Rik	4.3	7.25	1.69
ENSMUSG00000046138	9930021J03Rik	32.17	30.63	-1.05
ENSMUSG00000045065	9930022D16Rik	0.02	0.01	-2
ENSMUSG00000044730	9930104L06Rik	16.46	16.44	-1
ENSMUSG00000069893	9930111J21Rik1	0.07	0.02	-3.5
ENSMUSG00000069892	9930111J21Rik2	0.15	0.01	-15
ENSMUSG00000027596	a	0	0	0
ENSMUSG00000079144	A130010J15Rik	13.68	27.87	2.04
ENSMUSG00000022347	A1bg	0	0.02	0
ENSMUSG00000052595	A1cf	0	0	0
ENSMUSG00000034560	A230046K03Rik	14.64	12.05	-1.21
ENSMUSG00000038884	A230050P20Rik	4.89	4.72	-1.04
ENSMUSG00000087075	A230065H16Rik	0.07	1.14	16.29
ENSMUSG00000074473	A230072I06Rik	0	0	0
ENSMUSG00000030111	A2m	0.01	0.01	0
ENSMUSG00000091636	A330050F15Rik	0	0	0
ENSMUSG00000052014	A330070K13Rik	0	0	0
ENSMUSG00000028794	A3galt2	0.7	1.74	2.49
ENSMUSG00000047613	A430005L14Rik	27.25	32.9	1.21
ENSMUSG00000056014	A430033K04Rik	3.61	4.13	1.14
ENSMUSG00000074497	A430078G23Rik	0	0	0
ENSMUSG00000045838	A430105I19Rik	9.09	10.72	1.18
ENSMUSG00000047878	A4galt	1.58	3.82	2.42
ENSMUSG00000037953	A4gnt	0.02	0	0
ENSMUSG00000043122	A530016L24Rik	0.01	0.02	2
ENSMUSG00000089844	A530032D15Rik	0	0	0
ENSMUSG00000079800	A530040E14RIK	0	0	0
ENSMUSG00000021510	A530054K11Rik	2.97	2.58	-1.15
ENSMUSG00000043939	A530064D06Rik	0.02	0	0
ENSMUSG00000090863	A530084C06Rik	0.71	1.23	1.73
ENSMUSG00000052760	A630001G21Rik	0.42	0.27	-1.56
ENSMUSG00000075395	A630010A05Rik	0	0	0
ENSMUSG00000095493	A630023A22Rik	0.05	0.03	-1.67
ENSMUSG00000054293	A630033H20Rik	0.07	0.04	-1.75
ENSMUSG00000067541	A630073D07Rik	0	0	0
ENSMUSG00000094613	A630076J17Rik	0	0.08	0
ENSMUSG00000094840	A630081J09Rik	0.12	0.06	-2
ENSMUSG00000070313	A630095E13Rik	0	0.09	0
ENSMUSG00000096094	A630095N17Rik	0.27	0.21	-1.29
ENSMUSG00000090551	A730015C16Rik	0	0	0
ENSMUSG00000050875	A730017C20Rik	0.52	1.81	3.48
ENSMUSG00000085139	A730046J19Rik	0.29	0.41	1.41
ENSMUSG00000048636	A730049H05Rik	0.09	0	0
ENSMUSG00000053588	A730061H03Rik	0	0.35	0
ENSMUSG00000096923	A730071L15Rik	0.11	0	0
ENSMUSG00000053181	A830005F24Rik	0.27	0.57	2.11
ENSMUSG00000057715	A830018L16Rik	0.65	0.74	1.14
ENSMUSG00000055010	A830031A19Rik	0	0	0
ENSMUSG00000044150	A830080D01Rik	13.28	12.11	-1.1
ENSMUSG00000045506	A930002H24Rik	1.63	1.17	-1.39
ENSMUSG00000054057	A930004D18Rik	3.47	2.78	-1.25
ENSMUSG00000092210	A930009A15Rik	0	0	0
ENSMUSG00000089809	A930011G23Rik	0	0.08	0
ENSMUSG00000025727	A930017K11Rik	0.07	0.29	4.14
ENSMUSG00000032671	A930018P22Rik	0.25	0.24	-1.04
ENSMUSG00000090622	A930033H14Rik	4.86	5.2	1.07
ENSMUSG00000087385	AA415398	5.88	6.21	1.06
ENSMUSG00000033213	AA467197	0.11	0.23	2.09
ENSMUSG00000096687	AA474331	2.53	2.83	1.12
ENSMUSG00000095505	AA792892	0	0	0
ENSMUSG00000042510	AA986860	26.07	29.54	1.13
ENSMUSG00000058093	AA987161	3.44	3.45	1
ENSMUSG00000036678	Aaas	41.55	38.28	-1.09
ENSMUSG00000029482	Aacs	32.06	52.13	1.63
ENSMUSG00000027761	Aadac	1.4	6.46	4.61
ENSMUSG00000091376	Aadacl2	6	16.86	2.81
ENSMUSG00000078507	Aadacl3	0	0.01	0
ENSMUSG00000057228	Aadat	0.18	0.19	1.06
ENSMUSG00000021482	Aaed1	19.05	24.49	1.29
ENSMUSG00000037257	Aagab	51.26	51.95	1.01
ENSMUSG00000057230	Aak1	12.36	10.94	-1.13
ENSMUSG00000035642	Aamdc	28.05	26.68	-1.05
ENSMUSG00000006299	Aamp	287.51	304.35	1.06
ENSMUSG00000020804	Aanat	0	0.53	1
ENSMUSG00000027628	Aar2	17.75	20.66	1.16
ENSMUSG00000068522	Aard	0.08	0	0
ENSMUSG00000031960	Aars	45.26	58.07	1.28
ENSMUSG00000023938	Aars2	22.82	14.61	-1.56
ENSMUSG00000075528	Aarsd1	40	34.92	-1.15
ENSMUSG00000055923	Aasdh	21.1	20.17	-1.05
ENSMUSG00000025894	Aasdhppt	15.06	12.58	-1.2
ENSMUSG00000029695	Aass	0.26	5.46	21
ENSMUSG00000018697	Aatf	45.16	43.68	-1.03
ENSMUSG00000025375	Aatk	45.01	1.65	-27.28
ENSMUSG00000057191	AB124611	0.57	0.38	-1.5
ENSMUSG00000057880	Abat	3.03	1.26	-2.4
ENSMUSG00000015243	Abca1	4.71	5.91	1.25
ENSMUSG00000050296	Abca12	8.06	10.26	1.27
ENSMUSG00000004668	Abca13	0.01	0.61	61
ENSMUSG00000062017	Abca14	0	0	0
ENSMUSG00000054746	Abca15	0	0	0
ENSMUSG00000051900	Abca16	0.01	0	0
ENSMUSG00000035435	Abca17	0	0	0
ENSMUSG00000026944	Abca2	37.67	34.44	-1.09
ENSMUSG00000024130	Abca3	14.61	18.05	1.24
ENSMUSG00000028125	Abca4	2.01	1.4	-1.44
ENSMUSG00000018800	Abca5	4.08	2.6	-1.57
ENSMUSG00000044749	Abca6	0.38	0.14	-2.71
ENSMUSG00000035722	Abca7	28.78	26.61	-1.08
ENSMUSG00000041828	Abca8a	24.92	4.09	-6.09
ENSMUSG00000020620	Abca8b	3.87	0.21	-18.43
ENSMUSG00000041797	Abca9	0.36	0.17	-2.12
ENSMUSG00000031974	Abcb10	14.77	18.41	1.25
ENSMUSG00000027048	Abcb11	0.02	0.15	7.5
ENSMUSG00000040584	Abcb1a	0.05	0.06	1.2
ENSMUSG00000028970	Abcb1b	4.87	1.66	-2.93
ENSMUSG00000042476	Abcb4	0.11	0.02	-5.5
ENSMUSG00000072791	Abcb5	0.01	0.02	2
ENSMUSG00000026198	Abcb6	16.75	11.53	-1.45
ENSMUSG00000031333	Abcb7	11.72	8.88	-1.32
ENSMUSG00000028973	Abcb8	50.04	47.31	-1.06
ENSMUSG00000029408	Abcb9	23.54	11.52	-2.04
ENSMUSG00000023088	Abcc1	90.9	74.3	-1.22
ENSMUSG00000032842	Abcc10	11.93	8.97	-1.33
ENSMUSG00000036872	Abcc12	0.02	0.08	4
ENSMUSG00000025194	Abcc2	0.04	0	0
ENSMUSG00000020865	Abcc3	22.48	10.34	-2.17
ENSMUSG00000032849	Abcc4	14.53	16.12	1.11
ENSMUSG00000022822	Abcc5	56.68	38.23	-1.48
ENSMUSG00000030834	Abcc6	7.97	1.45	-5.5
ENSMUSG00000040136	Abcc8	0.76	0.23	-3.3
ENSMUSG00000030249	Abcc9	0.45	0.34	-1.32
ENSMUSG00000031378	Abcd1	5.67	5.24	-1.08
ENSMUSG00000055782	Abcd2	0.46	0.08	-5.75
ENSMUSG00000028127	Abcd3	65.94	82.79	1.26
ENSMUSG00000021240	Abcd4	9.6	9.98	1.04
ENSMUSG00000058355	Abce1	70.57	56.3	-1.25
ENSMUSG00000038762	Abcf1	138.58	102.81	-1.35
ENSMUSG00000028953	Abcf2	66.7	55.54	-1.2
ENSMUSG00000003234	Abcf3	85.41	97.58	1.14
ENSMUSG00000024030	Abcg1	3.83	3.05	-1.26
ENSMUSG00000029802	Abcg2	5.51	2.15	-2.56
ENSMUSG00000029299	Abcg3	0	0.02	0
ENSMUSG00000032131	Abcg4	2.93	2.76	-1.06
ENSMUSG00000040505	Abcg5	0	0.01	0
ENSMUSG00000024254	Abcg8	0.02	0.02	0
ENSMUSG00000033157	Abhd10	23.77	19.66	-1.21
ENSMUSG00000040532	Abhd11	128.79	107.36	-1.2
ENSMUSG00000032046	Abhd12	63.08	98.54	1.56
ENSMUSG00000090121	Abhd12b	0.13	0.03	-4.33
ENSMUSG00000040396	Abhd13	21.97	21.03	-1.04
ENSMUSG00000042210	Abhd14a	39.34	30.18	-1.3
ENSMUSG00000042073	Abhd14b	29.56	66.25	2.24
ENSMUSG00000000686	Abhd15	0.19	0.24	1.26
ENSMUSG00000007036	Abhd16a	102.29	112.35	1.1
ENSMUSG00000055882	Abhd16b	0	0.02	0
ENSMUSG00000003346	Abhd17a	62.99	67.81	1.08
ENSMUSG00000047368	Abhd17b	21.86	19.21	-1.14
ENSMUSG00000038459	Abhd17c	48.54	67.47	1.39
ENSMUSG00000039202	Abhd2	33.76	36.68	1.09
ENSMUSG00000002475	Abhd3	1.01	0.5	-2.02
ENSMUSG00000040997	Abhd4	55.91	68.56	1.23
ENSMUSG00000032540	Abhd5	47.02	73.97	1.57
ENSMUSG00000025277	Abhd6	23.12	42.33	1.83
ENSMUSG00000007950	Abhd8	13.18	11.49	-1.15
ENSMUSG00000058835	Abi1	292.11	290.12	-1.01
ENSMUSG00000026782	Abi2	12.46	12.8	1.03
ENSMUSG00000018381	Abi3	0.54	0.58	1.07
ENSMUSG00000035258	Abi3bp	11.56	4.51	-2.56
ENSMUSG00000026842	Abl1	80.97	62.89	-1.29
ENSMUSG00000026596	Abl2	26.97	22.38	-1.21
ENSMUSG00000025085	Ablim1	143.54	133.01	-1.08
ENSMUSG00000029095	Ablim2	1.08	0.95	-1.14
ENSMUSG00000032735	Ablim3	10.27	10.39	1.01
ENSMUSG00000015787	Abo	0	0.08	0
ENSMUSG00000017631	Abr	77.73	71.18	-1.09
ENSMUSG00000042895	Abra	0	0	0
ENSMUSG00000078453	Abracl	203.42	156.38	-1.3
ENSMUSG00000036376	Abt1	22.04	20.96	-1.05
ENSMUSG00000030083	Abtb1	19.84	17.11	-1.16
ENSMUSG00000032724	Abtb2	16.22	18.32	1.13
ENSMUSG00000094383	AC123873.1	0	0	0
ENSMUSG00000094474	AC123873.2	0	0	0
ENSMUSG00000095523	AC124606.1	0	0	0
ENSMUSG00000095763	AC124606.2	0	0	0
ENSMUSG00000079192	AC125149.1	0	0	0
ENSMUSG00000079794	AC125149.2	0	0	0
ENSMUSG00000094799	AC125149.3	0	0	0
ENSMUSG00000095092	AC125149.4	0	0	0
ENSMUSG00000094722	AC125178.1	0	0	0
ENSMUSG00000095076	AC125178.2	0	0	0
ENSMUSG00000095728	AC125178.3	0	0	0
ENSMUSG00000094791	AC126035.1	0	0	0
ENSMUSG00000079222	AC132444.1	0	0	0
ENSMUSG00000094728	AC132444.2	0	0	0
ENSMUSG00000094874	AC132444.3	0	0	0
ENSMUSG00000095450	AC132444.4	0	0	0
ENSMUSG00000095500	AC132444.5	0	0	0
ENSMUSG00000096808	AC132444.6	0	0	0
ENSMUSG00000094855	AC133095.1	0	0	0
ENSMUSG00000095475	AC133095.2	0	0	0
ENSMUSG00000079190	AC133103.1	0	0	0
ENSMUSG00000094514	AC133103.3	0	0	0
ENSMUSG00000095250	AC133103.4	0	0	0
ENSMUSG00000095672	AC133103.5	0	0	0
ENSMUSG00000095787	AC133103.6	0	0	0
ENSMUSG00000096100	AC133103.7	0	0	0
ENSMUSG00000074720	AC140325.1	0	0	0
ENSMUSG00000095570	AC140325.2	0	0	0
ENSMUSG00000096728	AC140325.3	0	0	0
ENSMUSG00000091585	AC140365.1	0	0	0
ENSMUSG00000095041	AC149090.1	0	0	0
ENSMUSG00000094172	AC163611.1	0	0	0
ENSMUSG00000095666	AC164084.1	0	0	0
ENSMUSG00000096680	AC164084.2	0	0	0
ENSMUSG00000094303	AC165294.1	0	0	0
ENSMUSG00000096236	AC165294.2	0	0	0
ENSMUSG00000096756	AC165294.3	0	0	0
ENSMUSG00000079808	AC168977.1	0	0	0
ENSMUSG00000094915	AC168977.2	0	0	0
ENSMUSG00000098835	AC182748.1	0	0	0
ENSMUSG00000095019	AC234645.1	0	0	0
ENSMUSG00000097395	AC244695.1	0	0	0
ENSMUSG00000097490	AC244695.2	0	0	0
ENSMUSG00000097611	AC244695.4	0	0	0
ENSMUSG00000036138	Acaa1a	59.3	61.97	1.05
ENSMUSG00000010651	Acaa1b	0.51	0.4	-1.27
ENSMUSG00000036880	Acaa2	224.88	462.24	2.06
ENSMUSG00000020532	Acaca	17.16	22.18	1.29
ENSMUSG00000042010	Acacb	2.68	4.98	1.86
ENSMUSG00000029456	Acad10	6.37	8.54	1.34
ENSMUSG00000090150	Acad11	17.76	18.03	1.02
ENSMUSG00000042647	Acad12	0.48	0.85	1.77
ENSMUSG00000031969	Acad8	56.37	60.92	1.08
ENSMUSG00000027710	Acad9	26.93	52.36	1.94
ENSMUSG00000026003	Acadl	69.85	118.52	1.7
ENSMUSG00000062908	Acadm	69.79	159.73	2.29
ENSMUSG00000029545	Acads	31.76	37.41	1.18
ENSMUSG00000030861	Acadsb	98.38	110.33	1.12
ENSMUSG00000018574	Acadvl	104.2	117.62	1.13
ENSMUSG00000030607	Acan	1.87	0.13	-14.38
ENSMUSG00000001588	Acap1	0.78	0.51	-1.53
ENSMUSG00000049076	Acap2	25.09	32.54	1.3
ENSMUSG00000029033	Acap3	86.33	89.35	1.03
ENSMUSG00000032047	Acat1	90.57	90.93	1
ENSMUSG00000023832	Acat2	9.04	14.96	1.65
ENSMUSG00000062480	Acat3	0.13	0.23	1.77
ENSMUSG00000026499	Acbd3	33.86	40.07	1.18
ENSMUSG00000056938	Acbd4	200.99	208.5	1.04
ENSMUSG00000026781	Acbd5	26.24	24	-1.09
ENSMUSG00000033701	Acbd6	107.72	119.16	1.11
ENSMUSG00000026644	Acbd7	0.38	0.45	1.18
ENSMUSG00000040272	Accs	10.79	8.77	-1.23
ENSMUSG00000075023	Accsl	0.42	0.22	-1.91
ENSMUSG00000038000	Acd	27.1	28.19	1.04
ENSMUSG00000020681	Ace	1.19	1.17	-1.02
ENSMUSG00000015405	Ace2	28.93	38.46	1.33
ENSMUSG00000101605	Ace3	0	0	0
ENSMUSG00000045019	Acer1	27.51	31.17	1.13
ENSMUSG00000038007	Acer2	13.33	11.98	-1.11
ENSMUSG00000030760	Acer3	42.28	39.67	-1.07
ENSMUSG00000023328	Ache	19.24	17.21	-1.12
ENSMUSG00000022185	Acin1	306.94	202.5	-1.52
ENSMUSG00000037872	Ackr1	0.99	0.57	-1.74
ENSMUSG00000044534	Ackr2	0.1	0.06	-1.67
ENSMUSG00000044337	Ackr3	59.52	67.91	1.14
ENSMUSG00000079355	Ackr4	0.11	0.26	2.36
ENSMUSG00000020917	Acly	119.56	171	1.43
ENSMUSG00000026348	Acmsd	0	0	0
ENSMUSG00000042505	Acn9	3.98	2.92	-1.36
ENSMUSG00000070985	Acnat1	0.08	0.05	-1.6
ENSMUSG00000060317	Acnat2	0.08	0	0
ENSMUSG00000028405	Aco1	19.68	15.33	-1.28
ENSMUSG00000022477	Aco2	178.86	199.17	1.11
ENSMUSG00000072949	Acot1	22.85	40.71	1.78
ENSMUSG00000047565	Acot10	8.9	7.52	-1.18
ENSMUSG00000034853	Acot11	0.51	1.67	3.27
ENSMUSG00000021620	Acot12	0.03	0.06	2
ENSMUSG00000006717	Acot13	41.25	44.37	1.08
ENSMUSG00000021226	Acot2	4.39	7.5	1.71
ENSMUSG00000021228	Acot3	0.02	0	0
ENSMUSG00000052392	Acot4	0.91	1.06	1.16
ENSMUSG00000042540	Acot5	0	0	0
ENSMUSG00000043487	Acot6	3.11	2.71	-1.15
ENSMUSG00000028937	Acot7	18.74	29.37	1.57
ENSMUSG00000017307	Acot8	26.96	31.5	1.17
ENSMUSG00000025287	Acot9	70.91	71.11	1
ENSMUSG00000020777	Acox1	52.44	73.53	1.4
ENSMUSG00000021751	Acox2	0.4	0.52	1.3
ENSMUSG00000029098	Acox3	20.69	20.05	-1.03
ENSMUSG00000027380	Acoxl	0.01	0	0
ENSMUSG00000044573	Acp1	9.32	6.99	-1.33
ENSMUSG00000002103	Acp2	14.36	14.72	1.03
ENSMUSG00000001348	Acp5	28.26	49.33	1.75
ENSMUSG00000028093	Acp6	76.45	69.74	-1.1
ENSMUSG00000032561	Acpp	23.18	21.72	-1.07
ENSMUSG00000012777	Acpt	0.02	0	0
ENSMUSG00000022622	Acr	0.02	0.06	3
ENSMUSG00000072770	Acrbp	16.58	15.06	-1.1
ENSMUSG00000032110	Acrv1	0.07	0.25	3.57
ENSMUSG00000032281	Acsbg1	138.58	255.6	1.84
ENSMUSG00000024207	Acsbg2	0.02	0	0
ENSMUSG00000076435	Acsf2	16.18	9.22	-1.75
ENSMUSG00000018796	Acsl1	106.02	213.24	2.01
ENSMUSG00000032883	Acsl3	113.57	98.59	-1.15
ENSMUSG00000031278	Acsl4	13.35	21.24	1.59
ENSMUSG00000024981	Acsl5	89.14	114.85	1.29
ENSMUSG00000020333	Acsl6	0.08	0.09	1.13
ENSMUSG00000033533	Acsm1	0.51	0.71	1.39
ENSMUSG00000030945	Acsm2	0.78	2.14	2.74
ENSMUSG00000030935	Acsm3	0.09	1.56	17.33
ENSMUSG00000047026	Acsm4	0.03	0.11	3.67
ENSMUSG00000030972	Acsm5	0	0.01	0
ENSMUSG00000027452	Acss1	5.89	4.32	-1.36
ENSMUSG00000027605	Acss2	5.34	9.64	1.81
ENSMUSG00000035948	Acss3	0.23	0.55	2.39
ENSMUSG00000031972	Acta1	8.57	7.25	-1.18
ENSMUSG00000035783	Acta2	49.5	16.33	-3.03
ENSMUSG00000029580	Actb	1208.02	1739.99	1.44
ENSMUSG00000055194	Actbl2	0.01	0.03	3
ENSMUSG00000068614	Actc1	2.92	3.46	1.18
ENSMUSG00000062825	Actg1	73.21	121.35	1.66
ENSMUSG00000059430	Actg2	8.75	3.61	-2.42
ENSMUSG00000078129	Actl10	0.05	0.09	1.8
ENSMUSG00000066368	Actl11	0.07	0.04	-1.75
ENSMUSG00000027671	Actl6a	120.07	113.89	-1.05
ENSMUSG00000029712	Actl6b	0.05	0.17	3.4
ENSMUSG00000070979	Actl7a	0.02	0	0
ENSMUSG00000070980	Actl7b	0.41	0.3	-1.37
ENSMUSG00000092519	Actl9	0.07	0.02	-3.5
ENSMUSG00000015143	Actn1	112.07	87.37	-1.28
ENSMUSG00000052374	Actn2	1.27	0.86	-1.48
ENSMUSG00000006457	Actn3	0.25	0.39	1.56
ENSMUSG00000054808	Actn4	989.37	942.04	-1.05
ENSMUSG00000021076	Actr10	31.18	35.01	1.12
ENSMUSG00000025228	Actr1a	136.24	137.21	1.01
ENSMUSG00000037351	Actr1b	125.52	115.94	-1.08
ENSMUSG00000020152	Actr2	72.58	84.52	1.16
ENSMUSG00000026341	Actr3	122.62	134.16	1.09
ENSMUSG00000056367	Actr3b	0.75	0.98	1.31
ENSMUSG00000037761	Actr5	14.94	15.38	1.03
ENSMUSG00000019948	Actr6	8.01	6.85	-1.17
ENSMUSG00000015971	Actr8	28.42	27.95	-1.02
ENSMUSG00000046615	Actrt1	0	0	0
ENSMUSG00000051276	Actrt2	0	0.03	0
ENSMUSG00000037737	Actrt3	0.03	0	0
ENSMUSG00000026836	Acvr1	31.63	42.29	1.34
ENSMUSG00000000532	Acvr1b	37.49	47.75	1.27
ENSMUSG00000026834	Acvr1c	0.02	0.06	3
ENSMUSG00000052155	Acvr2a	33.01	50.6	1.53
ENSMUSG00000061393	Acvr2b	7.03	6.62	-1.06
ENSMUSG00000000530	Acvrl1	6.29	7.48	1.19
ENSMUSG00000023262	Acy1	24	29.97	1.25
ENSMUSG00000024866	Acy3	4.25	7.42	1.75
ENSMUSG00000008822	Acyp1	21.07	18.35	-1.15
ENSMUSG00000060923	Acyp2	2.83	2.67	-1.06
ENSMUSG00000017697	Ada	7.91	7.32	-1.08
ENSMUSG00000027719	Adad1	0.23	0.35	1.52
ENSMUSG00000024266	Adad2	0.04	0	0
ENSMUSG00000027259	Adal	15.06	11.26	-1.34
ENSMUSG00000054693	Adam10	75.97	72.57	-1.05
ENSMUSG00000020926	Adam11	4.19	2.73	-1.53
ENSMUSG00000054555	Adam12	3.79	0.14	-27.07
ENSMUSG00000028041	Adam15	282.4	376.52	1.33
ENSMUSG00000052593	Adam17	44.65	48.69	1.09
ENSMUSG00000031552	Adam18	0	0.01	0
ENSMUSG00000011256	Adam19	9.42	0.66	-14.27
ENSMUSG00000072647	Adam1a	1.41	1.29	-1.09
ENSMUSG00000062438	Adam1b	0.01	0.04	4
ENSMUSG00000022039	Adam2	0.02	0	0
ENSMUSG00000046282	Adam20	0	0.02	0
ENSMUSG00000008438	Adam21	0.12	0.16	1.33
ENSMUSG00000040537	Adam22	0.54	0.3	-1.8
ENSMUSG00000025964	Adam23	26.39	0.58	-45.5
ENSMUSG00000046723	Adam24	0	0	0
ENSMUSG00000071937	Adam25	0	0	0
ENSMUSG00000048516	Adam26a	0	0	0
ENSMUSG00000063900	Adam26b	0	0	0
ENSMUSG00000014725	Adam28	4.47	9.34	2.09
ENSMUSG00000046258	Adam29	0	0	0
ENSMUSG00000031553	Adam3	0	0.26	0
ENSMUSG00000043468	Adam30	0.14	0.22	1.57
ENSMUSG00000037437	Adam32	0.42	0.97	2.31
ENSMUSG00000027318	Adam33	2.74	0.68	-4.03
ENSMUSG00000079058	Adam34	0	0	0
ENSMUSG00000054033	Adam39	0	0	0
ENSMUSG00000072972	Adam4	0.36	0.59	1.64
ENSMUSG00000031554	Adam5	0.31	0	0
ENSMUSG00000043945	Adam6a	0.03	0.06	2
ENSMUSG00000051804	Adam6b	0.03	0.05	1.67
ENSMUSG00000022056	Adam7	0.01	0	0
ENSMUSG00000025473	Adam8	4.19	8.33	1.99
ENSMUSG00000031555	Adam9	37.16	21.06	-1.76
ENSMUSG00000022057	Adamdec1	0.49	0.96	1.96
ENSMUSG00000022893	Adamts1	67.64	138.54	2.05
ENSMUSG00000024299	Adamts10	24.64	16.95	-1.45
ENSMUSG00000047497	Adamts12	5.53	5.82	1.05
ENSMUSG00000014852	Adamts13	2.02	0.28	-7.21
ENSMUSG00000059901	Adamts14	4.01	3.33	-1.2
ENSMUSG00000033453	Adamts15	13.05	22.16	1.7
ENSMUSG00000049538	Adamts16	0.14	0.05	-2.8
ENSMUSG00000058145	Adamts17	4.82	5.32	1.1
ENSMUSG00000053399	Adamts18	1.72	2.01	1.17
ENSMUSG00000053441	Adamts19	0.27	0.08	-3.38
ENSMUSG00000036545	Adamts2	2.52	0.99	-2.55
ENSMUSG00000022449	Adamts20	3.37	0.09	-37.44
ENSMUSG00000043635	Adamts3	0.12	0.03	-4
ENSMUSG00000006403	Adamts4	1.16	0.56	-2.07
ENSMUSG00000022894	Adamts5	1.88	0.23	-8.17
ENSMUSG00000046169	Adamts6	0.22	0.59	2.68
ENSMUSG00000032363	Adamts7	6.84	2.61	-2.62
ENSMUSG00000031994	Adamts8	0.56	0.27	-2.07
ENSMUSG00000030022	Adamts9	6.09	3.32	-1.83
ENSMUSG00000066113	Adamtsl1	24.96	3.84	-6.5
ENSMUSG00000036040	Adamtsl2	0.37	0.02	-18.5
ENSMUSG00000070469	Adamtsl3	3.88	0.74	-5.24
ENSMUSG00000015850	Adamtsl4	14.66	6.82	-2.15
ENSMUSG00000043822	Adamtsl5	132.59	117.25	-1.13
ENSMUSG00000056413	Adap1	3.91	3.62	-1.08
ENSMUSG00000020709	Adap2	0.08	0.18	2.25
ENSMUSG00000027951	Adar	29.21	27.45	-1.06
ENSMUSG00000020262	Adarb1	113.19	62.54	-1.81
ENSMUSG00000052551	Adarb2	0.15	0.04	-3.75
ENSMUSG00000031949	Adat1	4.93	3.61	-1.37
ENSMUSG00000019808	Adat2	6.24	5.51	-1.13
ENSMUSG00000035370	Adat3	8.11	7.98	-1.02
ENSMUSG00000021044	Adck1	23.02	26.28	1.14
ENSMUSG00000046947	Adck2	38.82	47.42	1.22
ENSMUSG00000026489	Adck3	31.93	13.96	-2.29
ENSMUSG00000003762	Adck4	33.57	34.94	1.04
ENSMUSG00000022550	Adck5	57.78	73.18	1.27
ENSMUSG00000020431	Adcy1	1.46	4.52	3.1
ENSMUSG00000026567	Adcy10	0.14	0.38	2.71
ENSMUSG00000021536	Adcy2	0.64	0.69	1.08
ENSMUSG00000020654	Adcy3	18.09	16.53	-1.09
ENSMUSG00000022220	Adcy4	0.58	0.72	1.24
ENSMUSG00000022840	Adcy5	0.64	0.14	-4.57
ENSMUSG00000022994	Adcy6	28.64	24.28	-1.18
ENSMUSG00000031659	Adcy7	0.79	1.71	2.16
ENSMUSG00000022376	Adcy8	0.52	0.3	-1.73
ENSMUSG00000005580	Adcy9	6.19	5.23	-1.18
ENSMUSG00000024256	Adcyap1	0.02	0	0
ENSMUSG00000029778	Adcyap1r1	0.35	0.38	1.09
ENSMUSG00000029106	Add1	307.4	340.82	1.11
ENSMUSG00000030000	Add2	0.62	0.15	-4.13
ENSMUSG00000025026	Add3	54.66	47.5	-1.15
ENSMUSG00000050994	Adgb	0.12	0.06	-2
ENSMUSG00000074207	Adh1	8.47	27.93	3.3
ENSMUSG00000037797	Adh4	0	0	0
ENSMUSG00000028138	Adh5	107.82	104.32	-1.03
ENSMUSG00000053054	Adh6a	0.2	0.13	-1.54
ENSMUSG00000074206	Adh6b	0.65	4.36	6.71
ENSMUSG00000055301	Adh7	18.74	34.2	1.82
ENSMUSG00000025911	Adhfe1	0.06	0.06	0
ENSMUSG00000020629	Adi1	27.73	33.88	1.22
ENSMUSG00000044405	Adig	0	1.54	2
ENSMUSG00000022878	Adipoq	0.06	0.17	2.83
ENSMUSG00000026457	Adipor1	142.23	130.56	-1.09
ENSMUSG00000030168	Adipor2	33.91	37.8	1.11
ENSMUSG00000039197	Adk	69.34	52.84	-1.31
ENSMUSG00000030790	Adm	40.82	94.82	2.32
ENSMUSG00000054136	Adm2	0.22	0.7	3.18
ENSMUSG00000051149	Adnp	12.01	10.59	-1.13
ENSMUSG00000053950	Adnp2	16.51	18.73	1.13
ENSMUSG00000057134	Ado	12.52	11.42	-1.1
ENSMUSG00000042429	Adora1	1.54	1.48	-1.04
ENSMUSG00000020178	Adora2a	0.39	0.98	2.51
ENSMUSG00000018500	Adora2b	5.79	4.78	-1.21
ENSMUSG00000000562	Adora3	0	0	0
ENSMUSG00000025236	Adpgk	38.87	36.65	-1.06
ENSMUSG00000002844	Adprh	73.04	64.86	-1.13
ENSMUSG00000031448	Adprhl1	0.1	0	0
ENSMUSG00000042558	Adprhl2	58.78	44.41	-1.32
ENSMUSG00000020910	Adprm	15.99	13.77	-1.16
ENSMUSG00000045875	Adra1a	0.05	0	0
ENSMUSG00000050541	Adra1b	0.38	0.04	-9.5
ENSMUSG00000027335	Adra1d	0.15	0.09	-1.67
ENSMUSG00000033717	Adra2a	0.59	0.85	1.44
ENSMUSG00000058620	Adra2b	0.02	0.03	1.5
ENSMUSG00000045318	Adra2c	0	0	0
ENSMUSG00000035283	Adrb1	1.46	1.73	1.18
ENSMUSG00000045730	Adrb2	70.47	94.59	1.34
ENSMUSG00000031489	Adrb3	3.61	0.81	-4.46
ENSMUSG00000024858	Adrbk1	208.56	237.06	1.14
ENSMUSG00000042249	Adrbk2	3.9	11.96	3.07
ENSMUSG00000039041	Adrm1	45.42	41.91	-1.08
ENSMUSG00000022407	Adsl	90.55	78.72	-1.15
ENSMUSG00000015961	Adss	62.37	61.38	-1.02
ENSMUSG00000011148	Adssl1	4.65	1.82	-2.55
ENSMUSG00000058022	Adtrp	1.94	9.38	4.84
ENSMUSG00000020473	Aebp1	6.2	2.58	-2.4
ENSMUSG00000030232	Aebp2	157.24	140.84	-1.12
ENSMUSG00000030609	Aen	42.7	33.67	-1.27
ENSMUSG00000054452	Aes	418.75	431.81	1.03
ENSMUSG00000095071	AF067061	0	0	0
ENSMUSG00000094237	AF067063	0	0	0
ENSMUSG00000044811	AF251705	1.98	2.01	1.02
ENSMUSG00000057116	AF366264	0	0	0
ENSMUSG00000039313	AF529169	0.01	0.04	4
ENSMUSG00000029094	Afap1	31.33	20.62	-1.52
ENSMUSG00000033032	Afap1l1	9.29	8.17	-1.14
ENSMUSG00000025083	Afap1l2	74.43	28.04	-2.65
ENSMUSG00000029313	Aff1	30.68	24.46	-1.25
ENSMUSG00000031189	Aff2	0.03	0.12	4
ENSMUSG00000037138	Aff3	7.44	2.37	-3.14
ENSMUSG00000049470	Aff4	172.12	142.37	-1.21
ENSMUSG00000024527	Afg3l2	46.34	47.69	1.03
ENSMUSG00000029369	Afm	0.02	0	0
ENSMUSG00000017718	Afmid	7.81	10.79	1.38
ENSMUSG00000054932	Afp	0.03	0	0
ENSMUSG00000049659	Aftph	87.54	96.91	1.11
ENSMUSG00000031521	Aga	16.78	18.9	1.13
ENSMUSG00000055013	Agap1	15.82	15.07	-1.05
ENSMUSG00000025422	Agap2	0.17	0.12	-1.42
ENSMUSG00000023353	Agap3	132.87	146.47	1.1
ENSMUSG00000025754	Agbl1	0.04	0.65	16.25
ENSMUSG00000040812	Agbl2	0.42	0.79	1.88
ENSMUSG00000038836	Agbl3	6.51	6.23	-1.04
ENSMUSG00000061298	Agbl4	0.09	0.37	4.11
ENSMUSG00000029165	Agbl5	30.62	29.52	-1.04
ENSMUSG00000015452	Ager	11.11	7.13	-1.56
ENSMUSG00000026159	Agfg1	51.74	50.51	-1.02
ENSMUSG00000029722	Agfg2	10.85	18.74	1.73
ENSMUSG00000021681	Aggf1	28.38	24.69	-1.15
ENSMUSG00000029916	Agk	3.94	3.15	-1.25
ENSMUSG00000033400	Agl	16.36	21.01	1.28
ENSMUSG00000040706	Agmat	0.21	0.49	2.33
ENSMUSG00000050103	Agmo	0.7	0.54	-1.3
ENSMUSG00000041530	Ago1	36.28	29.68	-1.22
ENSMUSG00000036698	Ago2	29.26	24.62	-1.19
ENSMUSG00000028842	Ago3	9.32	6.98	-1.34
ENSMUSG00000042500	Ago4	9.16	5.73	-1.6
ENSMUSG00000034254	Agpat1	52.12	49.83	-1.05
ENSMUSG00000026922	Agpat2	41.55	45.91	1.1
ENSMUSG00000001211	Agpat3	73.32	118.72	1.62
ENSMUSG00000023827	Agpat4	8.39	11.36	1.35
ENSMUSG00000031467	Agpat5	21.13	16.24	-1.3
ENSMUSG00000031545	Agpat6	43.21	45.07	1.04
ENSMUSG00000029314	Agpat9	1.37	2.47	1.8
ENSMUSG00000042410	Agps	57.45	51.78	-1.11
ENSMUSG00000020581	Agr2	1.57	2.21	1.41
ENSMUSG00000036231	Agr3	0.34	2.19	6.44
ENSMUSG00000041936	Agrn	445.94	314.71	-1.42
ENSMUSG00000005705	Agrp	0.78	0.93	1.19
ENSMUSG00000031980	Agt	0.18	1.14	6.33
ENSMUSG00000021557	Agtpbp1	21.18	21.44	1.01
ENSMUSG00000049115	Agtr1a	0.19	0.32	1.68
ENSMUSG00000054988	Agtr1b	0.1	0.27	2.7
ENSMUSG00000068122	Agtr2	12.16	10.17	-1.2
ENSMUSG00000029007	Agtrap	6.74	5.52	-1.22
ENSMUSG00000026272	Agxt	0	0	0
ENSMUSG00000089678	Agxt2	0	0	0
ENSMUSG00000026491	Ahctf1	78.27	76.47	-1.02
ENSMUSG00000027597	Ahcy	2.72	1.61	-1.69
ENSMUSG00000027893	Ahcyl1	125.42	98.39	-1.27
ENSMUSG00000029772	Ahcyl2	196.24	161.09	-1.22
ENSMUSG00000037692	Ahdc1	47.36	50.09	1.06
ENSMUSG00000019986	Ahi1	11.47	8.36	-1.37
ENSMUSG00000069833	Ahnak	131.42	203.42	1.55
ENSMUSG00000072812	Ahnak2	17.84	51.66	2.9
ENSMUSG00000019256	Ahr	9.49	9.55	1.01
ENSMUSG00000021575	Ahrr	0.99	0.42	-2.36
ENSMUSG00000021037	Ahsa1	154.32	160.72	1.04
ENSMUSG00000020288	Ahsa2	51.78	58.95	1.14
ENSMUSG00000022868	Ahsg	0	0.15	0
ENSMUSG00000032313	AI118078	9.58	2.1	-4.56
ENSMUSG00000035875	AI182371	1.68	0.69	-2.43
ENSMUSG00000050812	AI314180	46.23	43.62	-1.06
ENSMUSG00000038522	AI317395	0.05	0.17	3.4
ENSMUSG00000062753	AI413582	15.51	25.49	1.64
ENSMUSG00000074384	AI429214	4.53	8.67	1.91
ENSMUSG00000046312	AI464131	1.75	1.94	1.11
ENSMUSG00000045165	AI467606	0.29	0.76	2.62
ENSMUSG00000038598	AI481877	0.01	0	0
ENSMUSG00000078307	AI593442	0.02	0.01	-2
ENSMUSG00000010290	AI597479	13.9	11.74	-1.18
ENSMUSG00000074873	AI606181	5.26	4.88	-1.08
ENSMUSG00000073490	AI607873	0.13	0.07	-1.86
ENSMUSG00000034382	AI661453	85.96	106.64	1.24
ENSMUSG00000074195	AI747448	0	0	0
ENSMUSG00000047423	AI837181	46.02	52.91	1.15
ENSMUSG00000024970	AI846148	18.53	16.13	-1.15
ENSMUSG00000053297	AI854703	0.68	0.73	1.07
ENSMUSG00000056383	AI987944	3.91	3.04	-1.29
ENSMUSG00000040627	Aicda	0.01	0	0
ENSMUSG00000042901	Aida	40.17	35.56	-1.13
ENSMUSG00000024397	Aif1	0.51	0.15	-3.4
ENSMUSG00000001864	Aif1l	4.25	0.75	-5.67
ENSMUSG00000036932	Aifm1	32.91	31.06	-1.06
ENSMUSG00000020085	Aifm2	9.38	13.77	1.47
ENSMUSG00000022763	Aifm3	0.37	1.11	3
ENSMUSG00000019806	Aig1	25.88	29.59	1.14
ENSMUSG00000019866	Aim1	64.07	58.22	-1.1
ENSMUSG00000012123	Aim1l	104.56	354.68	3.39
ENSMUSG00000037860	Aim2	2.5	0.98	-2.55
ENSMUSG00000028029	Aimp1	103.91	92.68	-1.12
ENSMUSG00000029610	Aimp2	57.37	56.97	-1.01
ENSMUSG00000097319	Aip	0	0	0
ENSMUSG00000024847	Aip	50.61	45.9	-1.1
ENSMUSG00000040554	Aipl1	0.99	1.23	1.24
ENSMUSG00000000731	Aire	0	0.02	0
ENSMUSG00000039546	Ajap1	11.61	3.8	-3.06
ENSMUSG00000022178	Ajuba	157.5	122.22	-1.29
ENSMUSG00000091931	AK010878	12.17	8.4	-1.45
ENSMUSG00000026817	Ak1	17.73	19.18	1.08
ENSMUSG00000040729	AK129341	9.97	2.83	-3.52
ENSMUSG00000078139	AK157302	0.02	0.03	1.5
ENSMUSG00000028792	Ak2	247.73	352.99	1.42
ENSMUSG00000024782	Ak3	56.62	63.65	1.12
ENSMUSG00000028527	Ak4	1.65	2.32	1.41
ENSMUSG00000039058	Ak5	0.11	0.1	-1.1
ENSMUSG00000078941	Ak6	45.31	53.35	1.18
ENSMUSG00000041323	Ak7	0.05	0.09	1.8
ENSMUSG00000026807	Ak8	0.23	0	0
ENSMUSG00000091415	Ak9	0.02	0	0
ENSMUSG00000091415	Ak9	0	0.01	0
ENSMUSG00000018428	Akap1	50.6	35.19	-1.44
ENSMUSG00000047804	Akap10	13.7	13.04	-1.05
ENSMUSG00000022016	Akap11	12.07	11.51	-1.05
ENSMUSG00000038587	Akap12	9.11	1.72	-5.3
ENSMUSG00000066406	Akap13	25.73	24.55	-1.05
ENSMUSG00000036551	Akap14	0	0	0
ENSMUSG00000059708	Akap17b	1.94	2.08	1.07
ENSMUSG00000038729	Akap2	7.58	2.42	-3.13
ENSMUSG00000030344	Akap3	0	0	0
ENSMUSG00000050089	Akap4	0	0	0
ENSMUSG00000021057	Akap5	0.99	0.43	-2.3
ENSMUSG00000061603	Akap6	0.55	0.12	-4.58
ENSMUSG00000039166	Akap7	13.72	10.11	-1.36
ENSMUSG00000024045	Akap8	76.07	60.87	-1.25
ENSMUSG00000002625	Akap8l	45.89	35.09	-1.31
ENSMUSG00000040407	Akap9	60.69	61.52	1.01
ENSMUSG00000031023	Akip1	41.02	56.29	1.37
ENSMUSG00000023075	Akirin1	52.29	42.68	-1.23
ENSMUSG00000028291	Akirin2	89.31	87	-1.03
ENSMUSG00000039158	Akna	2.46	1.97	-1.25
ENSMUSG00000049565	Aknad1	2.27	2.14	-1.06
ENSMUSG00000036500	Akp3	0.02	0.08	4
ENSMUSG00000028692	Akr1a1	517.8	539.19	1.04
ENSMUSG00000061758	Akr1b10	15.46	21.93	1.42
ENSMUSG00000001642	Akr1b3	13.76	14.74	1.07
ENSMUSG00000052131	Akr1b7	0.03	0.89	29.67
ENSMUSG00000029762	Akr1b8	9.12	9.38	1.03
ENSMUSG00000021211	Akr1c12	0	0.03	0
ENSMUSG00000021213	Akr1c13	0.59	1.41	2.39
ENSMUSG00000033715	Akr1c14	0.31	0.45	1.45
ENSMUSG00000021214	Akr1c18	0.19	0.58	3.05
ENSMUSG00000071551	Akr1c19	0.03	0	0
ENSMUSG00000054757	Akr1c20	0	0	0
ENSMUSG00000021207	Akr1c21	0	0	0
ENSMUSG00000021210	Akr1c6	0	0	0
ENSMUSG00000025955	Akr1cl	0	0	0
ENSMUSG00000038641	Akr1d1	0.15	0.73	4.87
ENSMUSG00000045410	Akr1e1	17.92	18	1
ENSMUSG00000028743	Akr7a5	42.22	44.87	1.06
ENSMUSG00000001729	Akt1	316.35	279.71	-1.13
ENSMUSG00000011096	Akt1s1	166.28	156.16	-1.06
ENSMUSG00000004056	Akt2	59.29	51.78	-1.15
ENSMUSG00000019699	Akt3	3.96	3.45	-1.15
ENSMUSG00000031667	Aktip	51.04	61.54	1.21
ENSMUSG00000028393	Alad	36.73	147.96	4.03
ENSMUSG00000032786	Alas1	50.85	68.71	1.35
ENSMUSG00000025270	Alas2	0.59	1.57	2.66
ENSMUSG00000029368	Alb	0	0	0
ENSMUSG00000022636	Alcam	108.71	104.78	-1.04
ENSMUSG00000007833	Aldh16a1	204.89	232.87	1.14
ENSMUSG00000025007	Aldh18a1	32.38	24.44	-1.32
ENSMUSG00000053279	Aldh1a1	2.11	10.84	5.14
ENSMUSG00000013584	Aldh1a2	0.88	0.2	-4.4
ENSMUSG00000015134	Aldh1a3	3.98	4.85	1.22
ENSMUSG00000024747	Aldh1a7	24.97	41.79	1.67
ENSMUSG00000035561	Aldh1b1	1.03	2.36	2.29
ENSMUSG00000030088	Aldh1l1	2.16	3.02	1.4
ENSMUSG00000020256	Aldh1l2	11.77	4.85	-2.43
ENSMUSG00000029455	Aldh2	122.47	113.77	-1.08
ENSMUSG00000019102	Aldh3a1	42.71	14	-3.05
ENSMUSG00000010025	Aldh3a2	18.22	21.15	1.16
ENSMUSG00000024885	Aldh3b1	0.9	0.24	-3.75
ENSMUSG00000075296	Aldh3b2	53.32	119.88	2.25
ENSMUSG00000028737	Aldh4a1	36.63	44.79	1.22
ENSMUSG00000035936	Aldh5a1	4.78	4.71	-1.01
ENSMUSG00000021238	Aldh6a1	14.89	18.63	1.25
ENSMUSG00000053644	Aldh7a1	57.65	41.39	-1.39
ENSMUSG00000037542	Aldh8a1	0.12	0.33	2.75
ENSMUSG00000026687	Aldh9a1	34.09	46.91	1.38
ENSMUSG00000030695	Aldoa	566.85	748.75	1.32
ENSMUSG00000059343	Aldoart1	12.99	14.39	1.11
ENSMUSG00000063129	Aldoart2	1.35	1.88	1.39
ENSMUSG00000028307	Aldob	0.06	0	0
ENSMUSG00000017390	Aldoc	23.9	45.51	1.9
ENSMUSG00000039427	Alg1	22.32	20.33	-1.1
ENSMUSG00000075470	Alg10b	14.05	11.8	-1.19
ENSMUSG00000063362	Alg11	6.81	12.89	1.89
ENSMUSG00000035845	Alg12	12.1	10.8	-1.12
ENSMUSG00000041718	Alg13	26.85	23.33	-1.15
ENSMUSG00000039887	Alg14	32.2	31.99	-1.01
ENSMUSG00000039740	Alg2	19.11	18.27	-1.05
ENSMUSG00000033809	Alg3	26.58	21.42	-1.24
ENSMUSG00000036632	Alg5	49.69	42.05	-1.18
ENSMUSG00000073792	Alg6	9.71	5.42	-1.79
ENSMUSG00000035704	Alg8	21.5	21.98	1.02
ENSMUSG00000032059	Alg9	33.06	41.7	1.26
ENSMUSG00000055471	Alk	0.04	0.01	-4
ENSMUSG00000079036	Alkbh1	39	28.27	-1.38
ENSMUSG00000044339	Alkbh2	11.19	6.18	-1.81
ENSMUSG00000040174	Alkbh3	59.76	46.26	-1.29
ENSMUSG00000039754	Alkbh4	12.18	9.42	-1.29
ENSMUSG00000042650	Alkbh5	48.4	48.21	-1
ENSMUSG00000042831	Alkbh6	49.82	49.19	-1.01
ENSMUSG00000002661	Alkbh7	17.11	18.21	1.06
ENSMUSG00000025899	Alkbh8	9.48	9.39	-1.01
ENSMUSG00000020636	Allc	0.02	0.05	2.5
ENSMUSG00000063810	Alms1	2.63	2.52	-1.04
ENSMUSG00000000320	Alox12	28.12	78.72	2.8
ENSMUSG00000032807	Alox12b	60.95	71.74	1.18
ENSMUSG00000018907	Alox12e	0.62	4.33	6.98
ENSMUSG00000018924	Alox15	0.18	0.46	2.56
ENSMUSG00000025701	Alox5	4.01	2.76	-1.45
ENSMUSG00000060063	Alox5ap	1.2	0.63	-1.9
ENSMUSG00000020891	Alox8	0.1	0.08	-1.25
ENSMUSG00000020892	Aloxe3	14.25	16.06	1.13
ENSMUSG00000079440	Alpi	0	0	0
ENSMUSG00000028028	Alpk1	7.42	6.07	-1.22
ENSMUSG00000032845	Alpk2	0.05	0	0
ENSMUSG00000038763	Alpk3	0.5	0.08	-6.25
ENSMUSG00000028766	Alpl	3.78	1.7	-2.22
ENSMUSG00000026246	Alppl2	0	0	0
ENSMUSG00000026024	Als2	6.44	5.74	-1.12
ENSMUSG00000044037	Als2cl	51.49	77.28	1.5
ENSMUSG00000072295	Als2cr11	0.01	0.02	2
ENSMUSG00000047528	Als2cr12	0.78	1.55	1.99
ENSMUSG00000036602	Alx1	0.14	0.09	-1.56
ENSMUSG00000014603	Alx3	0.32	0.11	-2.91
ENSMUSG00000040310	Alx4	1.04	0.27	-3.85
ENSMUSG00000025134	Alyref	114.18	102.34	-1.12
ENSMUSG00000060244	Alyref2	5.26	5.7	1.08
ENSMUSG00000022244	Amacr	11.79	12.16	1.03
ENSMUSG00000029288	Ambn	0.09	0	0
ENSMUSG00000028356	Ambp	0	0	0
ENSMUSG00000040506	Ambra1	32.79	56.4	1.72
ENSMUSG00000075232	Amd1	9.1	10.76	1.18
ENSMUSG00000063953	Amd2	0.04	0.02	-2
ENSMUSG00000015890	Amdhd1	0.04	0.06	1.5
ENSMUSG00000036820	Amdhd2	27.31	27.2	-1
ENSMUSG00000031354	Amelx	7.76	0.13	-59.69
ENSMUSG00000050332	Amer1	8.61	10.73	1.25
ENSMUSG00000021986	Amer2	0.24	0.18	-1.33
ENSMUSG00000045174	Amer3	0.01	0	0
ENSMUSG00000031751	Amfr	119.55	143.76	1.2
ENSMUSG00000035262	Amh	0.68	0.89	1.31
ENSMUSG00000023047	Amhr2	0.19	2.45	12.89
ENSMUSG00000048534	Amica1	0.18	0.72	4
ENSMUSG00000050947	Amigo1	8.58	12.25	1.43
ENSMUSG00000048218	Amigo2	2.62	3.37	1.29
ENSMUSG00000032593	Amigo3	2.27	4.1	1.81
ENSMUSG00000042225	Ammecr1	41.03	16.24	-2.53
ENSMUSG00000041915	Ammecr1l	39.16	36.72	-1.07
ENSMUSG00000021278	Amn	0.53	0.15	-3.53
ENSMUSG00000068250	Amn1	11.49	9.87	-1.16
ENSMUSG00000041688	Amot	22.2	11.32	-1.96
ENSMUSG00000013076	Amotl1	71.51	71.21	-1
ENSMUSG00000032531	Amotl2	74.7	67.97	-1.1
ENSMUSG00000070385	Ampd1	2.02	2.06	1.02
ENSMUSG00000027889	Ampd2	59.92	39.84	-1.5
ENSMUSG00000005686	Ampd3	28.18	3.91	-7.21
ENSMUSG00000021314	Amph	1.2	0.66	-1.82
ENSMUSG00000032607	Amt	9.22	11.84	1.28
ENSMUSG00000029282	Amtn	0	0	0
ENSMUSG00000074264	Amy1	3.21	2.75	-1.17
ENSMUSG00000070360	Amy2a1	0	0	0
ENSMUSG00000096569	Amy2a2	0	0	0
ENSMUSG00000093931	Amy2a3	0	0	0
ENSMUSG00000096770	Amy2a4	0	0	0
ENSMUSG00000074268	Amy2a5	0	0	0
ENSMUSG00000050022	Amz1	1.2	0.41	-2.93
ENSMUSG00000020610	Amz2	56.52	52.46	-1.08
ENSMUSG00000014355	Anapc1	112.51	94.3	-1.19
ENSMUSG00000036977	Anapc10	7.51	6.88	-1.09
ENSMUSG00000025135	Anapc11	68.9	81.18	1.18
ENSMUSG00000035048	Anapc13	196.99	196.46	-1
ENSMUSG00000030649	Anapc15	31.3	38	1.21
ENSMUSG00000074780	Anapc15-ps	9.81	7.03	-1.4
ENSMUSG00000020107	Anapc16	70.78	60.89	-1.16
ENSMUSG00000026965	Anapc2	169.44	222.02	1.31
ENSMUSG00000029176	Anapc4	78.88	74.25	-1.06
ENSMUSG00000029472	Anapc5	171.52	175.41	1.02
ENSMUSG00000029466	Anapc7	47.23	48.01	1.02
ENSMUSG00000072115	Ang	25.83	17.19	-1.5
ENSMUSG00000047894	Ang2	0.35	0	0
ENSMUSG00000060615	Ang4	0	0	0
ENSMUSG00000053961	Ang5	0	0	0
ENSMUSG00000072598	Ang6	0	0	0
ENSMUSG00000021257	Angel1	12.54	11.7	-1.07
ENSMUSG00000026634	Angel2	49.57	45.76	-1.08
ENSMUSG00000022309	Angpt1	0.63	0.26	-2.42
ENSMUSG00000031465	Angpt2	1.73	0.62	-2.79
ENSMUSG00000027460	Angpt4	0.01	0.03	3
ENSMUSG00000033544	Angptl1	5.78	3.89	-1.49
ENSMUSG00000004105	Angptl2	33.95	18.11	-1.87
ENSMUSG00000028553	Angptl3	0.01	0	0
ENSMUSG00000002289	Angptl4	10.65	23.89	2.24
ENSMUSG00000038742	Angptl6	3.22	3.86	1.2
ENSMUSG00000028989	Angptl7	1.23	2.92	2.37
ENSMUSG00000022265	Ank	22.8	42.66	1.87
ENSMUSG00000031543	Ank1	1.63	2.75	1.69
ENSMUSG00000032826	Ank2	4.05	2.15	-1.88
ENSMUSG00000069601	Ank3	78.51	62.08	-1.26
ENSMUSG00000039342	Ankar	0	0.01	0
ENSMUSG00000066510	Ankdd1a	0.79	1.77	2.24
ENSMUSG00000047117	Ankdd1b	0.02	0.16	8
ENSMUSG00000074771	Ankef1	0.05	0.1	2
ENSMUSG00000047773	Ankfn1	0.64	2.93	4.58
ENSMUSG00000020790	Ankfy1	41.97	47.76	1.14
ENSMUSG00000024483	Ankhd1	145.32	131.59	-1.1
ENSMUSG00000040351	Ankib1	12.97	12.23	-1.06
ENSMUSG00000032257	Ankk1	0.16	0.42	2.63
ENSMUSG00000046295	Ankle1	15.36	17.67	1.15
ENSMUSG00000029501	Ankle2	18.11	19.03	1.05
ENSMUSG00000034212	Ankmy1	0.18	0.18	0
ENSMUSG00000036188	Ankmy2	17.7	22.4	1.27
ENSMUSG00000021661	Ankra2	43.95	51.42	1.17
ENSMUSG00000024803	Ankrd1	0.12	0	0
ENSMUSG00000031508	Ankrd10	53.81	45.81	-1.17
ENSMUSG00000035569	Ankrd11	97.35	75.7	-1.29
ENSMUSG00000034647	Ankrd12	8.1	7.66	-1.06
ENSMUSG00000041870	Ankrd13a	134.32	161.46	1.2
ENSMUSG00000037907	Ankrd13b	34.01	25.45	-1.34
ENSMUSG00000039988	Ankrd13c	48.99	47.3	-1.04
ENSMUSG00000005986	Ankrd13d	25.47	31.94	1.25
ENSMUSG00000047909	Ankrd16	79.4	72.1	-1.1
ENSMUSG00000055204	Ankrd17	41.12	37.17	-1.11
ENSMUSG00000025172	Ankrd2	0.42	0.12	-3.5
ENSMUSG00000024774	Ankrd22	45.21	57.87	1.28
ENSMUSG00000067653	Ankrd23	8.12	10.11	1.25
ENSMUSG00000054708	Ankrd24	27.11	25.81	-1.05
ENSMUSG00000007827	Ankrd26	6.53	5.15	-1.27
ENSMUSG00000034867	Ankrd27	41.7	50.52	1.21
ENSMUSG00000014496	Ankrd28	18.58	13.15	-1.41
ENSMUSG00000057766	Ankrd29	21.63	10.74	-2.01
ENSMUSG00000021597	Ankrd32	12.68	11.78	-1.08
ENSMUSG00000047034	Ankrd33	0	0	0
ENSMUSG00000022237	Ankrd33b	1.46	1.27	-1.15
ENSMUSG00000049097	Ankrd34a	0.16	0.08	-2
ENSMUSG00000045034	Ankrd34b	0.01	0.03	3
ENSMUSG00000047606	Ankrd34c	0	0	0
ENSMUSG00000038354	Ankrd35	71.76	91.25	1.27
ENSMUSG00000020481	Ankrd36	0.02	0	0
ENSMUSG00000050914	Ankrd37	19.67	16.58	-1.19
ENSMUSG00000079610	Ankrd39	11.6	9.62	-1.21
ENSMUSG00000020864	Ankrd40	95.76	75.63	-1.27
ENSMUSG00000041343	Ankrd42	2.96	2.67	-1.11
ENSMUSG00000052331	Ankrd44	19.94	17.61	-1.13
ENSMUSG00000044835	Ankrd45	0.07	0	0
ENSMUSG00000048307	Ankrd46	26.71	30.83	1.15
ENSMUSG00000031931	Ankrd49	24.11	24.09	-1
ENSMUSG00000044864	Ankrd50	75.94	74.28	-1.02
ENSMUSG00000014498	Ankrd52	65.95	46.56	-1.42
ENSMUSG00000014747	Ankrd53	0	0	0
ENSMUSG00000033055	Ankrd54	32.2	30.3	-1.06
ENSMUSG00000049985	Ankrd55	0.34	0.4	1.18
ENSMUSG00000040183	Ankrd6	3.98	6.06	1.52
ENSMUSG00000027517	Ankrd60	0	0	0
ENSMUSG00000029607	Ankrd61	0.56	0.65	1.16
ENSMUSG00000078137	Ankrd63	0.02	0.06	3
ENSMUSG00000078487	Ankrd65	0.9	1.74	1.93
ENSMUSG00000096140	Ankrd66	0.07	0.14	2
ENSMUSG00000029517	Ankrd7	0.06	0.04	-1.5
ENSMUSG00000037904	Ankrd9	8.5	11.92	1.4
ENSMUSG00000024219	Anks1	22.76	23.35	1.03
ENSMUSG00000058589	Anks1b	2.41	0.1	-24.1
ENSMUSG00000022515	Anks3	25.79	21.83	-1.18
ENSMUSG00000030909	Anks4b	0.03	0.04	1.33
ENSMUSG00000066191	Anks6	7.93	14.75	1.86
ENSMUSG00000074591	Ankub1	0	0	0
ENSMUSG00000026199	Ankzf1	24.42	21.64	-1.13
ENSMUSG00000036777	Anln	31.64	43.06	1.36
ENSMUSG00000031075	Ano1	28.5	41.9	1.47
ENSMUSG00000037949	Ano10	10.2	14.09	1.38
ENSMUSG00000038115	Ano2	1.37	4.49	3.28
ENSMUSG00000074968	Ano3	0.02	0.03	1.5
ENSMUSG00000035189	Ano4	0.33	0.37	1.12
ENSMUSG00000055489	Ano5	0	0.01	0
ENSMUSG00000064210	Ano6	36.16	32.46	-1.11
ENSMUSG00000034107	Ano7	1.13	1.79	1.58
ENSMUSG00000034863	Ano8	14.87	8.48	-1.75
ENSMUSG00000054662	Ano9	22.04	23.8	1.08
ENSMUSG00000032249	Anp32a	509.25	582.88	1.14
ENSMUSG00000028333	Anp32b	227.07	226.58	-1
ENSMUSG00000015749	Anp32e	279.83	260.05	-1.08
ENSMUSG00000039062	Anpep	28.81	58.24	2.02
ENSMUSG00000033420	Antxr1	176.55	117.81	-1.5
ENSMUSG00000029338	Antxr2	4.12	1.54	-2.68
ENSMUSG00000047441	Antxrl	0	0	0
ENSMUSG00000024659	Anxa1	1554.76	2734.25	1.76
ENSMUSG00000031635	Anxa10	0	0.02	0
ENSMUSG00000021866	Anxa11	75.29	52.61	-1.43
ENSMUSG00000032231	Anxa2	2102.69	3558.55	1.69
ENSMUSG00000029484	Anxa3	53.58	57.07	1.07
ENSMUSG00000029994	Anxa4	100.64	135.92	1.35
ENSMUSG00000027712	Anxa5	314.37	324.79	1.03
ENSMUSG00000018340	Anxa6	61.28	65.86	1.07
ENSMUSG00000021814	Anxa7	138.3	185.94	1.34
ENSMUSG00000021950	Anxa8	1203.42	650.4	-1.85
ENSMUSG00000015702	Anxa9	2.37	2.66	1.12
ENSMUSG00000021322	Aoah	0.01	0.07	7
ENSMUSG00000029811	Aoc1	0.01	0.2	20
ENSMUSG00000078651	Aoc2	11.41	9.84	-1.16
ENSMUSG00000019326	Aoc3	3.84	1.06	-3.62
ENSMUSG00000063558	Aox1	1.4	0.87	-1.61
ENSMUSG00000079554	Aox2	0.15	0.48	3.2
ENSMUSG00000064294	Aox3	3.89	1.49	-2.61
ENSMUSG00000038242	Aox4	13.29	6.98	-1.9
ENSMUSG00000074238	Ap1ar	64.49	73.7	1.14
ENSMUSG00000009090	Ap1b1	215.35	172.74	-1.25
ENSMUSG00000031731	Ap1g1	58.88	66.65	1.13
ENSMUSG00000040701	Ap1g2	172.51	199.37	1.16
ENSMUSG00000003033	Ap1m1	69.83	63.3	-1.1
ENSMUSG00000003309	Ap1m2	57.9	67.39	1.16
ENSMUSG00000004849	Ap1s1	144.05	151.73	1.05
ENSMUSG00000031367	Ap1s2	4.63	2.49	-1.86
ENSMUSG00000054702	Ap1s3	12	9.54	-1.26
ENSMUSG00000060279	Ap2a1	102.83	86.12	-1.19
ENSMUSG00000002957	Ap2a2	35.79	39.13	1.09
ENSMUSG00000035152	Ap2b1	54.62	62.13	1.14
ENSMUSG00000022841	Ap2m1	67.18	58.35	-1.15
ENSMUSG00000008036	Ap2s1	197.87	231.45	1.17
ENSMUSG00000021686	Ap3b1	32.87	39.25	1.19
ENSMUSG00000062444	Ap3b2	0.05	0.12	2.4
ENSMUSG00000020198	Ap3d1	49.95	50.17	1
ENSMUSG00000021824	Ap3m1	15.25	12.71	-1.2
ENSMUSG00000031539	Ap3m2	2.68	3.06	1.14
ENSMUSG00000024480	Ap3s1	4.63	4.99	1.08
ENSMUSG00000063801	Ap3s2	15.92	14.18	-1.12
ENSMUSG00000032952	Ap4b1	20.2	20.4	1.01
ENSMUSG00000001998	Ap4e1	17.47	15.29	-1.14
ENSMUSG00000019518	Ap4m1	74.64	68.64	-1.09
ENSMUSG00000020955	Ap4s1	18.85	15.24	-1.24
ENSMUSG00000049562	Ap5b1	6.94	6.79	-1.02
ENSMUSG00000036291	Ap5m1	9.83	9.14	-1.08
ENSMUSG00000068264	Ap5s1	18.16	16.18	-1.12
ENSMUSG00000039623	Ap5z1	12.89	11.14	-1.16
ENSMUSG00000019979	Apaf1	13.02	11.51	-1.13
ENSMUSG00000024897	Apba1	0.51	0.27	-1.89
ENSMUSG00000030519	Apba2	1.22	0.17	-7.18
ENSMUSG00000004931	Apba3	44.94	49.21	1.1
ENSMUSG00000037032	Apbb1	12.19	6.97	-1.75
ENSMUSG00000026786	Apbb1ip	1.08	0.37	-2.92
ENSMUSG00000029207	Apbb2	21.26	5.89	-3.61
ENSMUSG00000005871	Apc	39.74	35.88	-1.11
ENSMUSG00000020135	Apc2	0.5	0.35	-1.43
ENSMUSG00000071847	Apcdd1	327.52	127.91	-2.56
ENSMUSG00000026542	Apcs	0	0	0
ENSMUSG00000032590	Apeh	64.89	64.74	-1
ENSMUSG00000035960	Apex1	146.31	137.87	-1.06
ENSMUSG00000025269	Apex2	10.92	11.49	1.05
ENSMUSG00000015750	Aph1a	8.97	9.49	1.06
ENSMUSG00000032375	Aph1b	7.18	5.48	-1.31
ENSMUSG00000053040	Aph1c	0.41	0.29	-1.41
ENSMUSG00000027193	Api5	45.29	38.5	-1.18
ENSMUSG00000010911	Apip	45.46	55.61	1.22
ENSMUSG00000073705	Apitd1	28.11	27.89	-1.01
ENSMUSG00000030051	Aplf	7.54	7.97	1.06
ENSMUSG00000037010	Apln	1.28	0.89	-1.44
ENSMUSG00000044338	Aplnr	1.06	3.86	3.64
ENSMUSG00000006651	Aplp1	2.86	2.75	-1.04
ENSMUSG00000031996	Aplp2	184.9	186.92	1.01
ENSMUSG00000033096	Apmap	40.08	39.11	-1.02
ENSMUSG00000032083	Apoa1	1.63	3.42	2.1
ENSMUSG00000028070	Apoa1bp	76.95	101.27	1.32
ENSMUSG00000005681	Apoa2	0.73	1.01	1.38
ENSMUSG00000032080	Apoa4	0.02	0.09	4.5
ENSMUSG00000032079	Apoa5	0	0	0
ENSMUSG00000020609	Apob	0	0	0
ENSMUSG00000040613	Apobec1	2.01	1.96	-1.03
ENSMUSG00000040694	Apobec2	0.91	0.49	-1.86
ENSMUSG00000009585	Apobec3	7.43	12.1	1.63
ENSMUSG00000055547	Apobec4	0	0	0
ENSMUSG00000042759	Apobr	0.15	0.19	1.27
ENSMUSG00000040564	Apoc1	82.2	67.54	-1.22
ENSMUSG00000002992	Apoc2	0.15	0	0
ENSMUSG00000032081	Apoc3	0	0.25	0
ENSMUSG00000074336	Apoc4	0	0	0
ENSMUSG00000022548	Apod	8.37	3.86	-2.17
ENSMUSG00000002985	Apoe	177.33	76.76	-2.31
ENSMUSG00000047631	Apof	0.05	0	0
ENSMUSG00000000049	Apoh	0.06	0.04	-1.5
ENSMUSG00000050982	Apol10a	0	0	0
ENSMUSG00000050014	Apol10b	0	0	0
ENSMUSG00000091650	Apol11a	0	0	0
ENSMUSG00000091694	Apol11b	0	0	0
ENSMUSG00000033576	Apol6	0.36	0.02	-18
ENSMUSG00000010601	Apol7a	0.48	0.63	1.31
ENSMUSG00000068252	Apol7b	0	0	0
ENSMUSG00000044309	Apol7c	0	0	0
ENSMUSG00000071716	Apol7e	0	0	0
ENSMUSG00000056656	Apol8	2.17	2.17	0
ENSMUSG00000057346	Apol9a	0	0	0
ENSMUSG00000068246	Apol9b	0.02	0	0
ENSMUSG00000090698	Apold1	1.32	0.64	-2.06
ENSMUSG00000024391	Apom	0.76	0.38	-2
ENSMUSG00000051716	Apon	0.04	0.13	3.25
ENSMUSG00000079508	Apoo	3.22	3.05	-1.06
ENSMUSG00000025525	Apool	33.36	34.34	1.03
ENSMUSG00000037787	Apopt1	75.28	61.08	-1.23
ENSMUSG00000022892	App	280.12	291.17	1.04
ENSMUSG00000018481	Appbp2	19.6	21.51	1.1
ENSMUSG00000040760	Appl1	17.42	17.8	1.02
ENSMUSG00000020263	Appl2	83.02	67.42	-1.23
ENSMUSG00000006589	Aprt	173.86	141.99	-1.22
ENSMUSG00000028411	Aptx	34.77	39.57	1.14
ENSMUSG00000004655	Aqp1	9.43	5.28	-1.79
ENSMUSG00000042797	Aqp11	0.3	0.41	1.37
ENSMUSG00000045091	Aqp12	0.04	0.04	0
ENSMUSG00000023013	Aqp2	0	0	0
ENSMUSG00000028435	Aqp3	1524.82	1816.05	1.19
ENSMUSG00000024411	Aqp4	0.05	0.12	2.4
ENSMUSG00000044217	Aqp5	0.16	0.14	-1.14
ENSMUSG00000043144	Aqp6	0	0	0
ENSMUSG00000028427	Aqp7	0.11	0.13	1.18
ENSMUSG00000030762	Aqp8	0	0	0
ENSMUSG00000032204	Aqp9	0.04	0	0
ENSMUSG00000040383	Aqr	41.57	37.12	-1.12
ENSMUSG00000046532	Ar	1.27	4.99	3.93
ENSMUSG00000001127	Araf	151.71	144.71	-1.05
ENSMUSG00000032812	Arap1	119	100.79	-1.18
ENSMUSG00000037999	Arap2	41.23	53.68	1.3
ENSMUSG00000024451	Arap3	1.57	0.58	-2.71
ENSMUSG00000022602	Arc	133.83	166.33	1.24
ENSMUSG00000032096	Arcn1	69.88	66.62	-1.05
ENSMUSG00000029378	Areg	7.31	24.1	3.3
ENSMUSG00000042350	Arel1	15.23	12.23	-1.25
ENSMUSG00000048076	Arf1	176.12	191.61	1.09
ENSMUSG00000062421	Arf2	40.14	47.29	1.18
ENSMUSG00000051853	Arf3	102.5	111.25	1.09
ENSMUSG00000021877	Arf4	370.14	420.84	1.14
ENSMUSG00000020440	Arf5	245.05	279.36	1.14
ENSMUSG00000044147	Arf6	120.22	121.01	1.01
ENSMUSG00000027575	Arfgap1	86.89	70.57	-1.23
ENSMUSG00000027255	Arfgap2	50.37	50.34	-1
ENSMUSG00000054277	Arfgap3	12.86	14.83	1.15
ENSMUSG00000067851	Arfgef1	69.63	88.19	1.27
ENSMUSG00000074582	Arfgef2	21.16	18.41	-1.15
ENSMUSG00000074513	Arfip1	43.36	40.25	-1.08
ENSMUSG00000030881	Arfip2	104.84	87.31	-1.2
ENSMUSG00000038671	Arfrp1	56.18	48.98	-1.15
ENSMUSG00000019987	Arg1	2.21	4.18	1.89
ENSMUSG00000021125	Arg2	12.25	6.16	-1.99
ENSMUSG00000040459	Arglu1	102.69	74.78	-1.37
ENSMUSG00000027247	Arhgap1	142.5	153.92	1.08
ENSMUSG00000037148	Arhgap10	37.72	35.12	-1.07
ENSMUSG00000041219	Arhgap11a	18.1	20.85	1.15
ENSMUSG00000041225	Arhgap12	28.96	25.42	-1.14
ENSMUSG00000049744	Arhgap15	0.01	0	0
ENSMUSG00000030766	Arhgap17	21.94	20	-1.1
ENSMUSG00000039031	Arhgap18	17.26	26.88	1.56
ENSMUSG00000025154	Arhgap19	9.48	13.53	1.43
ENSMUSG00000053199	Arhgap20	1.61	0.52	-3.1
ENSMUSG00000036591	Arhgap21	85.43	60.6	-1.41
ENSMUSG00000063506	Arhgap22	26.83	13.44	-2
ENSMUSG00000049807	Arhgap23	41.75	50.14	1.2
ENSMUSG00000057315	Arhgap24	15.16	32.42	2.14
ENSMUSG00000030047	Arhgap25	6.39	7.87	1.23
ENSMUSG00000036452	Arhgap26	14.2	24.94	1.76
ENSMUSG00000034255	Arhgap27	109.19	69.34	-1.57
ENSMUSG00000024043	Arhgap28	0.38	0.61	1.61
ENSMUSG00000039831	Arhgap29	85.19	33.92	-2.51
ENSMUSG00000048865	Arhgap30	0.53	1.34	2.53
ENSMUSG00000022799	Arhgap31	7.67	1.91	-4.02
ENSMUSG00000041444	Arhgap32	47.2	53.16	1.13
ENSMUSG00000036882	Arhgap33	12.14	12.12	-1
ENSMUSG00000058230	Arhgap35	37.15	35.28	-1.05
ENSMUSG00000036198	Arhgap36	0.14	0.17	1.21
ENSMUSG00000033697	Arhgap39	18.76	15.83	-1.19
ENSMUSG00000031389	Arhgap4	6.21	7.55	1.22
ENSMUSG00000074625	Arhgap40	3.16	3.93	1.24
ENSMUSG00000050730	Arhgap42	10.1	9.02	-1.12
ENSMUSG00000033389	Arhgap44	6.74	6.34	-1.06
ENSMUSG00000035133	Arhgap5	31.71	34.96	1.1
ENSMUSG00000031355	Arhgap6	0.84	0.83	-1.01
ENSMUSG00000078954	Arhgap8	4.94	13.96	2.83
ENSMUSG00000040345	Arhgap9	3.68	2.88	-1.28
ENSMUSG00000025132	Arhgdia	420.49	412.81	-1.02
ENSMUSG00000030220	Arhgdib	25.68	36.61	1.43
ENSMUSG00000073433	Arhgdig	1.75	2.38	1.36
ENSMUSG00000040940	Arhgef1	238.83	197.45	-1.21
ENSMUSG00000071176	Arhgef10	32.92	24.12	-1.36
ENSMUSG00000040964	Arhgef10l	22.18	26.79	1.21
ENSMUSG00000041977	Arhgef11	33.07	36.5	1.1
ENSMUSG00000059495	Arhgef12	58.44	43.72	-1.34
ENSMUSG00000052921	Arhgef15	1.33	1.74	1.31
ENSMUSG00000029032	Arhgef16	12.07	14.1	1.17
ENSMUSG00000032875	Arhgef17	14.82	13.49	-1.1
ENSMUSG00000004568	Arhgef18	28.54	30	1.05
ENSMUSG00000028919	Arhgef19	106.69	139.7	1.31
ENSMUSG00000028059	Arhgef2	38.44	31.42	-1.22
ENSMUSG00000019467	Arhgef25	14.38	8.87	-1.62
ENSMUSG00000036885	Arhgef26	25.88	19.6	-1.32
ENSMUSG00000021662	Arhgef28	22.86	19.95	-1.15
ENSMUSG00000021895	Arhgef3	45.54	43.95	-1.04
ENSMUSG00000054901	Arhgef33	0.18	0.16	-1.13
ENSMUSG00000045094	Arhgef37	9.18	7.78	-1.18
ENSMUSG00000040969	Arhgef38	0.31	0.15	-2.07
ENSMUSG00000051517	Arhgef39	22.06	41.98	1.9
ENSMUSG00000037509	Arhgef4	65.23	60.92	-1.07
ENSMUSG00000004562	Arhgef40	62.64	46.3	-1.35
ENSMUSG00000033542	Arhgef5	90.2	93.53	1.04
ENSMUSG00000031133	Arhgef6	3.61	0.58	-6.22
ENSMUSG00000031511	Arhgef7	38.71	45.14	1.17
ENSMUSG00000025656	Arhgef9	4.6	1.43	-3.22
ENSMUSG00000007880	Arid1a	92.03	73.4	-1.25
ENSMUSG00000069729	Arid1b	39.14	41.45	1.06
ENSMUSG00000033237	Arid2	38.77	35.01	-1.11
ENSMUSG00000019564	Arid3a	10.13	10.45	1.03
ENSMUSG00000004661	Arid3b	2.8	5.89	2.1
ENSMUSG00000066224	Arid3c	0.02	0.06	3
ENSMUSG00000048118	Arid4a	32.89	25.37	-1.3
ENSMUSG00000039219	Arid4b	42.28	47.08	1.11
ENSMUSG00000037447	Arid5a	20.66	29.95	1.45
ENSMUSG00000019947	Arid5b	44.54	35.37	-1.26
ENSMUSG00000025234	Arih1	102.9	99.33	-1.04
ENSMUSG00000064145	Arih2	33.45	32.34	-1.03
ENSMUSG00000060904	Arl1	92.21	74.95	-1.23
ENSMUSG00000025870	Arl10	18.39	18.66	1.01
ENSMUSG00000043157	Arl11	0.07	0.32	4.57
ENSMUSG00000052549	Arl13a	0	0	0
ENSMUSG00000022911	Arl13b	31.83	36.13	1.14
ENSMUSG00000098207	Arl14	0	0.15	0
ENSMUSG00000027122	Arl14ep	19.05	21.87	1.15
ENSMUSG00000073568	Arl14epl	0	0	0
ENSMUSG00000042348	Arl15	12.53	12.3	-1.02
ENSMUSG00000057594	Arl16	21.91	20.4	-1.07
ENSMUSG00000024944	Arl2	63.15	57.15	-1.1
ENSMUSG00000031776	Arl2bp	61.94	61.91	-1
ENSMUSG00000025035	Arl3	51	49.19	-1.04
ENSMUSG00000047446	Arl4a	78.46	62.14	-1.26
ENSMUSG00000049866	Arl4c	13.97	18.86	1.35
ENSMUSG00000034936	Arl4d	40.38	77.88	1.93
ENSMUSG00000036093	Arl5a	38.26	27.09	-1.41
ENSMUSG00000017418	Arl5b	31.21	45.71	1.46
ENSMUSG00000038352	Arl5c	0.89	0.78	-1.14
ENSMUSG00000022722	Arl6	13.9	13.15	-1.06
ENSMUSG00000030654	Arl6ip1	83.51	137.28	1.64
ENSMUSG00000029404	Arl6ip4	109.78	91.59	-1.2
ENSMUSG00000035199	Arl6ip5	60.76	56.02	-1.08
ENSMUSG00000026960	Arl6ip6	63.46	56.22	-1.13
ENSMUSG00000026426	Arl8a	141.06	124.24	-1.14
ENSMUSG00000030105	Arl8b	87.3	101.3	1.16
ENSMUSG00000063820	Arl9	0.81	2.61	3.22
ENSMUSG00000027599	Armc1	13.29	10.77	-1.23
ENSMUSG00000038525	Armc10	25.46	28.5	1.12
ENSMUSG00000024223	Armc12	0.28	0.08	-3.5
ENSMUSG00000071324	Armc2	1.08	1.47	1.36
ENSMUSG00000037683	Armc3	0.01	0.04	4
ENSMUSG00000061802	Armc4	0.01	0.01	0
ENSMUSG00000042178	Armc5	29.38	26.17	-1.12
ENSMUSG00000002343	Armc6	20.4	21.84	1.07
ENSMUSG00000057219	Armc7	6.84	8.38	1.23
ENSMUSG00000032468	Armc8	14.07	14.42	1.02
ENSMUSG00000062590	Armc9	16.5	10.93	-1.51
ENSMUSG00000033460	Armcx1	28.03	27.96	-1
ENSMUSG00000033436	Armcx2	9.37	8.1	-1.16
ENSMUSG00000049047	Armcx3	3.04	2.15	-1.41
ENSMUSG00000049804	Armcx4	4.72	3.05	-1.55
ENSMUSG00000072969	Armcx5	11.56	9.28	-1.25
ENSMUSG00000050394	Armcx6	4.61	4.65	1.01
ENSMUSG00000015522	Arnt	42.12	39.22	-1.07
ENSMUSG00000015709	Arnt2	3.79	3.21	-1.18
ENSMUSG00000055116	Arntl	20.13	21.89	1.09
ENSMUSG00000040187	Arntl2	18.3	11.61	-1.58
ENSMUSG00000029621	Arpc1a	233.52	247.54	1.06
ENSMUSG00000029622	Arpc1b	222.9	154.25	-1.45
ENSMUSG00000006304	Arpc2	409.88	590.58	1.44
ENSMUSG00000029465	Arpc3	390.39	468.99	1.2
ENSMUSG00000079426	Arpc4	164.44	192.26	1.17
ENSMUSG00000008475	Arpc5	159.02	157.5	-1.01
ENSMUSG00000026755	Arpc5l	93.2	109.81	1.18
ENSMUSG00000007656	Arpp19	444.67	609.22	1.37
ENSMUSG00000032503	Arpp21	0.06	0.62	10.33
ENSMUSG00000060890	Arr3	0.14	0	0
ENSMUSG00000018909	Arrb1	2.58	1.25	-2.06
ENSMUSG00000060216	Arrb2	29.28	16.05	-1.82
ENSMUSG00000026972	Arrdc1	106.81	110.69	1.04
ENSMUSG00000002910	Arrdc2	5.89	7.18	1.22
ENSMUSG00000074794	Arrdc3	52.66	41.01	-1.28
ENSMUSG00000042659	Arrdc4	26.53	42.91	1.62
ENSMUSG00000073380	Arrdc5	0	0	0
ENSMUSG00000022620	Arsa	14.68	13.95	-1.05
ENSMUSG00000042082	Arsb	4.51	3.82	-1.18
ENSMUSG00000020604	Arsg	3.54	3.16	-1.12
ENSMUSG00000036412	Arsi	2.54	4.11	1.62
ENSMUSG00000046561	Arsj	0.2	1.33	6.65
ENSMUSG00000021592	Arsk	5.72	7.24	1.27
ENSMUSG00000030996	Art1	0.1	0.03	-3.33
ENSMUSG00000030651	Art2b	0	0	0
ENSMUSG00000034842	Art3	37.1	10.45	-3.55
ENSMUSG00000030217	Art4	19.33	15.57	-1.24
ENSMUSG00000070424	Art5	0.19	0.53	2.79
ENSMUSG00000028539	Artn	10.73	27.11	2.53
ENSMUSG00000031982	Arv1	10.49	9.27	-1.13
ENSMUSG00000098615	Arvcf	0	0	0
ENSMUSG00000000325	Arvcf	41.19	37.42	-1.1
ENSMUSG00000035277	Arx	0.01	0	0
ENSMUSG00000048355	Arxes1	1.57	1.83	1.17
ENSMUSG00000048040	Arxes2	3.43	2.67	-1.28
ENSMUSG00000003559	As3mt	2.77	2.39	-1.16
ENSMUSG00000031591	Asah1	92.07	102.11	1.11
ENSMUSG00000024887	Asah2	3.22	3.51	1.09
ENSMUSG00000022377	Asap1	70.56	66.42	-1.06
ENSMUSG00000052632	Asap2	37.27	13.79	-2.7
ENSMUSG00000036995	Asap3	11.13	8.09	-1.38
ENSMUSG00000026311	Asb1	2.12	2.17	1.02
ENSMUSG00000038204	Asb10	0	0.03	0
ENSMUSG00000031382	Asb11	0.27	0.73	2.7
ENSMUSG00000031204	Asb12	0	0	0
ENSMUSG00000033781	Asb13	30.76	27.26	-1.13
ENSMUSG00000021898	Asb14	0	0	0
ENSMUSG00000029685	Asb15	0	0	0
ENSMUSG00000034768	Asb16	0.36	0.31	-1.16
ENSMUSG00000038997	Asb17	0.16	0.35	2.19
ENSMUSG00000067081	Asb18	0.01	0	0
ENSMUSG00000021200	Asb2	0.5	1.85	3.7
ENSMUSG00000020305	Asb3	8.82	9.87	1.12
ENSMUSG00000042607	Asb4	0.53	0.28	-1.89
ENSMUSG00000031519	Asb5	0.11	0.08	-1.38
ENSMUSG00000039483	Asb6	34.28	33.89	-1.01
ENSMUSG00000030509	Asb7	7.75	7.3	-1.06
ENSMUSG00000048175	Asb8	13.58	14.97	1.1
ENSMUSG00000031384	Asb9	0.03	0	0
ENSMUSG00000044475	Ascc1	41.78	51.87	1.24
ENSMUSG00000020412	Ascc2	45.11	42.64	-1.06
ENSMUSG00000038774	Ascc3	16.57	18.63	1.12
ENSMUSG00000020052	Ascl1	0.04	0.34	8.5
ENSMUSG00000009248	Ascl2	11.63	5.14	-2.26
ENSMUSG00000035951	Ascl3	1.88	2.33	1.24
ENSMUSG00000085111	Ascl4	0.48	0.83	1.73
ENSMUSG00000097918	Ascl5	1.63	0	-2
ENSMUSG00000019857	Asf1a	18.43	22.96	1.25
ENSMUSG00000005470	Asf1b	30.02	31.88	1.06
ENSMUSG00000020884	Asgr1	0.59	0.42	-1.4
ENSMUSG00000040963	Asgr2	0	0.12	0
ENSMUSG00000028053	Ash1l	29.95	27.4	-1.09
ENSMUSG00000031575	Ash2l	70.2	70.55	1
ENSMUSG00000023017	Asic1	0.04	0.04	0
ENSMUSG00000020704	Asic2	0.01	0.01	0
ENSMUSG00000038276	Asic3	0.74	0.55	-1.35
ENSMUSG00000033007	Asic4	0.03	0.02	-1.5
ENSMUSG00000028008	Asic5	0	0	0
ENSMUSG00000025533	Asl	36.27	42.1	1.16
ENSMUSG00000093806	Asmt	4.84	3.22	-1.5
ENSMUSG00000052456	Asna1	99.96	91.39	-1.09
ENSMUSG00000029752	Asns	68.05	81.57	1.2
ENSMUSG00000026095	Asnsd1	33.52	39.26	1.17
ENSMUSG00000020774	Aspa	5.73	0.17	-33.71
ENSMUSG00000038704	Aspdh	1.19	0	-1
ENSMUSG00000037686	Aspg	5.52	5.09	-1.08
ENSMUSG00000028207	Asph	28.63	30.05	1.05
ENSMUSG00000046378	Asphd1	0	0.06	0
ENSMUSG00000029348	Asphd2	0.42	0.13	-3.23
ENSMUSG00000033952	Aspm	8.88	14.88	1.68
ENSMUSG00000021388	Aspn	15.95	7.68	-2.08
ENSMUSG00000033508	Asprv1	23.55	84.86	3.6
ENSMUSG00000025142	Aspscr1	169.65	203.48	1.2
ENSMUSG00000024654	Asrgl1	13.85	6.11	-2.27
ENSMUSG00000076441	Ass1	25.62	23.38	-1.1
ENSMUSG00000032567	Aste1	16.89	19.56	1.16
ENSMUSG00000050468	Astl	0	0.04	0
ENSMUSG00000026587	Astn1	0.7	0.01	-70
ENSMUSG00000028373	Astn2	2.53	2.51	-1.01
ENSMUSG00000040250	Asun	100.66	97.05	-1.04
ENSMUSG00000042548	Asxl1	27.6	25.98	-1.06
ENSMUSG00000037486	Asxl2	28.31	20.88	-1.36
ENSMUSG00000045215	Asxl3	0.27	0.24	-1.13
ENSMUSG00000010796	Asz1	0.02	0	0
ENSMUSG00000013662	Atad1	53.35	43.91	-1.21
ENSMUSG00000022360	Atad2	17.48	14.83	-1.18
ENSMUSG00000052812	Atad2b	14.99	16.57	1.11
ENSMUSG00000029036	Atad3a	126.22	104.23	-1.21
ENSMUSG00000017550	Atad5	11.93	8.49	-1.41
ENSMUSG00000024426	Atat1	42.87	41.3	-1.04
ENSMUSG00000034958	Atcay	0.07	0.03	-2.33
ENSMUSG00000030850	Ate1	15.16	16.11	1.06
ENSMUSG00000023027	Atf1	94.05	93.65	-1
ENSMUSG00000027104	Atf2	49.96	48.26	-1.04
ENSMUSG00000026628	Atf3	862.84	1344.94	1.56
ENSMUSG00000042406	Atf4	328.67	470.55	1.43
ENSMUSG00000038539	Atf5	68.38	68.05	-1
ENSMUSG00000026663	Atf6	18.26	17.19	-1.06
ENSMUSG00000015461	Atf6b	160.59	147.65	-1.09
ENSMUSG00000099083	Atf7	101.22	86.36	-1.17
ENSMUSG00000030213	Atf7ip	141.84	122.45	-1.16
ENSMUSG00000039200	Atf7ip2	0.07	0.23	3.29
ENSMUSG00000021619	Atg10	6.6	9.14	1.38
ENSMUSG00000037204	Atg101	40.44	54.82	1.36
ENSMUSG00000032905	Atg12	30.29	29.28	-1.03
ENSMUSG00000027244	Atg13	53.32	61.69	1.16
ENSMUSG00000037526	Atg14	9.06	8.12	-1.12
ENSMUSG00000026289	Atg16l1	38.7	39.78	1.03
ENSMUSG00000047767	Atg16l2	25.84	10.32	-2.5
ENSMUSG00000024773	Atg2a	22.07	22.26	1.01
ENSMUSG00000041341	Atg2b	12.62	11.06	-1.14
ENSMUSG00000022663	Atg3	40.99	45.02	1.1
ENSMUSG00000079418	Atg4a	5.09	6.86	1.35
ENSMUSG00000087119	Atg4a-ps	2.01	2.49	1.24
ENSMUSG00000026280	Atg4b	112.56	124.31	1.1
ENSMUSG00000028550	Atg4c	7.71	7.23	-1.07
ENSMUSG00000002820	Atg4d	31.87	40.27	1.26
ENSMUSG00000038160	Atg5	25.24	25.24	0
ENSMUSG00000030314	Atg7	28.32	28.26	-1
ENSMUSG00000033124	Atg9a	41.59	38.11	-1.09
ENSMUSG00000038295	Atg9b	3.03	2.11	-1.44
ENSMUSG00000062031	Athl1	22.89	23.37	1.02
ENSMUSG00000026192	Atic	86.48	69.05	-1.25
ENSMUSG00000021066	Atl1	1.44	1.02	-1.41
ENSMUSG00000059811	Atl2	29.17	34.5	1.18
ENSMUSG00000024759	Atl3	44.67	48.87	1.09
ENSMUSG00000034218	Atm	29.41	22.54	-1.3
ENSMUSG00000047388	Atmin	13.66	16.44	1.2
ENSMUSG00000004263	Atn1	129.28	95.38	-1.36
ENSMUSG00000073043	Atoh1	0.07	0.08	1.14
ENSMUSG00000036816	Atoh7	0	0	0
ENSMUSG00000037621	Atoh8	3.27	1.81	-1.81
ENSMUSG00000018585	Atox1	241.14	352.14	1.46
ENSMUSG00000025324	Atp10a	10.54	21.11	2
ENSMUSG00000055415	Atp10b	4.07	3.94	-1.03
ENSMUSG00000031441	Atp11a	81.44	81.33	-1
ENSMUSG00000037400	Atp11b	64.55	94.11	1.46
ENSMUSG00000062949	Atp11c	7.72	6.47	-1.19
ENSMUSG00000022229	Atp12a	16.84	6.85	-2.46
ENSMUSG00000031862	Atp13a1	63.16	50.5	-1.25
ENSMUSG00000036622	Atp13a2	67.8	61.3	-1.11
ENSMUSG00000022533	Atp13a3	28.16	19.99	-1.41
ENSMUSG00000038094	Atp13a4	2.86	16.43	5.74
ENSMUSG00000048939	Atp13a5	0	0.03	0
ENSMUSG00000033161	Atp1a1	609.27	529.48	-1.15
ENSMUSG00000007097	Atp1a2	4.38	0.28	-15.64
ENSMUSG00000040907	Atp1a3	0.06	0.01	-6
ENSMUSG00000007107	Atp1a4	0	0	0
ENSMUSG00000026576	Atp1b1	92.41	99.48	1.08
ENSMUSG00000041329	Atp1b2	4.81	1.48	-3.25
ENSMUSG00000032412	Atp1b3	185.64	224.24	1.21
ENSMUSG00000016327	Atp1b4	0.09	0.07	-1.29
ENSMUSG00000030730	Atp2a1	1.27	2.84	2.24
ENSMUSG00000029467	Atp2a2	128.06	123.5	-1.04
ENSMUSG00000020788	Atp2a3	10.97	3.29	-3.33
ENSMUSG00000019943	Atp2b1	23.54	19.77	-1.19
ENSMUSG00000030302	Atp2b2	0.01	0.01	0
ENSMUSG00000031376	Atp2b3	0.03	0	0
ENSMUSG00000026463	Atp2b4	66.34	52.03	-1.28
ENSMUSG00000032570	Atp2c1	74.04	75.14	1.01
ENSMUSG00000034112	Atp2c2	9.02	10.67	1.18
ENSMUSG00000005553	Atp4a	1.73	1.75	1.01
ENSMUSG00000031449	Atp4b	0	0.03	0
ENSMUSG00000025428	Atp5a1	1131.44	1249.28	1.1
ENSMUSG00000025393	Atp5b	2431.48	2929.47	1.2
ENSMUSG00000025781	Atp5c1	238.88	245.78	1.03
ENSMUSG00000003072	Atp5d	527.85	614.26	1.16
ENSMUSG00000016252	Atp5e	443.99	469.48	1.06
ENSMUSG00000000563	Atp5f1	128.52	113.57	-1.13
ENSMUSG00000006057	Atp5g1	10.21	11.78	1.15
ENSMUSG00000062683	Atp5g2	2.61	1.59	-1.64
ENSMUSG00000018770	Atp5g3	533.82	551.47	1.03
ENSMUSG00000034566	Atp5h	215.12	186.91	-1.15
ENSMUSG00000022890	Atp5j	509.23	497.52	-1.02
ENSMUSG00000038690	Atp5j2	217.29	235.48	1.08
ENSMUSG00000050856	Atp5k	248.94	280.46	1.13
ENSMUSG00000038717	Atp5l	0.45	0.5	1.11
ENSMUSG00000022956	Atp5o	398.13	430.27	1.08
ENSMUSG00000054894	Atp5s	8.39	7.94	-1.06
ENSMUSG00000057229	Atp5sl	43.9	31.5	-1.39
ENSMUSG00000019087	Atp6ap1	258.72	361.76	1.4
ENSMUSG00000078958	Atp6ap1l	0.22	0	0
ENSMUSG00000031007	Atp6ap2	52.94	81.6	1.54
ENSMUSG00000019302	Atp6v0a1	121.23	123.96	1.02
ENSMUSG00000038023	Atp6v0a2	26.32	28.36	1.08
ENSMUSG00000038600	Atp6v0a4	7.76	16.21	2.09
ENSMUSG00000033379	Atp6v0b	189.27	228.1	1.21
ENSMUSG00000024121	Atp6v0c	12.67	12.17	-1.04
ENSMUSG00000013160	Atp6v0d1	85.77	126.54	1.48
ENSMUSG00000028238	Atp6v0d2	0.91	1.43	1.57
ENSMUSG00000015575	Atp6v0e	204.08	251.18	1.23
ENSMUSG00000039347	Atp6v0e2	17.1	10.95	-1.56
ENSMUSG00000052459	Atp6v1a	85.28	99.9	1.17
ENSMUSG00000006269	Atp6v1b1	4.23	11.11	2.63
[truncated: 19,630 more rows]

## Sheet: 1b GFP_High_Enriched_Genes
1b: SOX2-GFP_High-Enriched Protein Coding Genes
Gene	Common_name	P0 GFP Low_mean	P0 GFP High_mean	Fold_change
ENSMUSG00000096257	Ccer	0.04	14.91	372.75
ENSMUSG00000031981	Capn9	0.04	5.42	135.5
ENSMUSG00000026058	Khdrbs2	0.19	12.52	65.89
ENSMUSG00000000544	Gpa33	0.32	12.27	38.34
ENSMUSG00000033427	Upb1	1.29	49.41	38.3
ENSMUSG00000030307	Slc6a11	0.62	16.81	27.11
ENSMUSG00000002633	Shh	0.84	20.74	24.69
ENSMUSG00000055027	Smyd1	0.29	6.68	23.03
ENSMUSG00000029695	Aass	0.26	5.46	21
ENSMUSG00000025491	Ifitm1	2.79	58.03	20.8
ENSMUSG00000071562	Stfa1	4.33	75.53	17.44
ENSMUSG00000078787	Cyp2t4	16.4	248.82	15.17
ENSMUSG00000010175	Prox1	0.36	5.4	15
ENSMUSG00000036466	Megf11	0.57	8.42	14.77
ENSMUSG00000039349	C130074G19Rik	0.59	8.38	14.2
ENSMUSG00000035158	Mitf	1.24	17.17	13.85
ENSMUSG00000027674	Pex5l	1.01	13.46	13.33
ENSMUSG00000030263	Lrmp	19.78	256.74	12.98
ENSMUSG00000022986	Krt75	12.07	139.66	11.57
ENSMUSG00000026170	Cyp27a1	1.77	18.62	10.52
ENSMUSG00000028699	Tspan1	1.34	13.52	10.09
ENSMUSG00000025876	Unc5a	1.41	13.75	9.75
ENSMUSG00000024526	Cidea	0.55	5.35	9.73
ENSMUSG00000033805	Ephx4	0.84	7.78	9.26
ENSMUSG00000030268	Bcat1	2.71	24.97	9.21
ENSMUSG00000030107	Usp18	0.76	6.57	8.64
ENSMUSG00000030862	Cpxm2	24.49	206.57	8.43
ENSMUSG00000071561	BC100530	63.35	505.94	7.99
ENSMUSG00000013611	Snx31	1.09	8.66	7.94
ENSMUSG00000028681	Ptch2	2.52	19.85	7.88
ENSMUSG00000030108	Slc6a13	2.17	17.02	7.84
ENSMUSG00000042216	Sgsm1	0.85	6.35	7.47
ENSMUSG00000030666	Calcb	1.47	10.94	7.44
ENSMUSG00000004885	Crabp2	44.95	331.44	7.37
ENSMUSG00000038791	Scgb3a2	10.32	72.55	7.03
ENSMUSG00000026875	Traf1	0.84	5.86	6.98
ENSMUSG00000029671	Wnt16	2.29	15.88	6.93
ENSMUSG00000020140	Lgr5	1.56	10.79	6.92
ENSMUSG00000024109	Nrxn1	1.67	11.47	6.87
ENSMUSG00000074156	Ces1h	4.72	31.28	6.63
ENSMUSG00000022871	Fetub	6.28	40.38	6.43
ENSMUSG00000020218	Wif1	14.79	93.78	6.34
ENSMUSG00000025582	Nptx1	0.91	5.75	6.32
ENSMUSG00000039683	Sdk1	1.78	11.22	6.3
ENSMUSG00000021508	Cxcl14	21.38	134.4	6.29
ENSMUSG00000031844	Hsd17b2	3.13	19.37	6.19
ENSMUSG00000017491	Rarb	2.76	16.98	6.15
ENSMUSG00000046354	Defb14	4.84	29.78	6.15
ENSMUSG00000059668	Krt4	2323.16	14203	6.11
ENSMUSG00000053461	Hhipl2	0.85	5.18	6.09
ENSMUSG00000035896	Rnase1	3.99	24.07	6.03
ENSMUSG00000049107	Ntf3	8.22	49.47	6.02
ENSMUSG00000034265	Zdhhc14	1	5.98	5.98
ENSMUSG00000027186	Elf5	10.16	60.74	5.98
ENSMUSG00000001865	Cpa3	0.99	5.89	5.95
ENSMUSG00000061068	Mcpt4	1.2	7.11	5.92
ENSMUSG00000039364	Sectm1b	7.62	43.81	5.75
ENSMUSG00000026961	Lrrc26	1.39	7.98	5.74
ENSMUSG00000004988	Fxyd4	1.57	9.01	5.74
ENSMUSG00000038094	Atp13a4	2.86	16.43	5.74
ENSMUSG00000041737	Tmem45b	19.37	110.31	5.69
ENSMUSG00000029727	Cyp3a13	1.94	10.75	5.54
ENSMUSG00000048764	Tmprss11f	1.14	6.27	5.5
ENSMUSG00000044748	Defb1	12.97	70.76	5.46
ENSMUSG00000040605	Bace2	1.49	8.1	5.44
ENSMUSG00000029322	Plac8	1.66	8.8	5.3
ENSMUSG00000053279	Aldh1a1	2.11	10.84	5.14
ENSMUSG00000023913	Pla2g7	4.73	24.26	5.13
ENSMUSG00000079594	BC117090	1.5	7.67	5.11
ENSMUSG00000032841	Prr5l	3.37	17.13	5.08
ENSMUSG00000022040	Ephx2	1.49	7.49	5.03
ENSMUSG00000035861	Tmprss11b	25.12	126.11	5.02
ENSMUSG00000046402	Rbp1	10.85	54.34	5.01
ENSMUSG00000022598	Psca	3.33	16.65	5
ENSMUSG00000058022	Adtrp	1.94	9.38	4.84
ENSMUSG00000045539	Sprr3	100.02	483.95	4.84
ENSMUSG00000021509	Slc25a48	1.2	5.7	4.75
ENSMUSG00000055675	Kbtbd11	5.74	27.28	4.75
ENSMUSG00000027500	Stmn2	2.22	10.38	4.68
ENSMUSG00000023886	Smoc2	25.56	118.79	4.65
ENSMUSG00000027761	Aadac	1.4	6.46	4.61
ENSMUSG00000043924	Ncmap	3.7	16.91	4.57
ENSMUSG00000044734	Serpinb1a	15.89	72.45	4.56
ENSMUSG00000063130	Calml3	315.23	1430.5	4.54
ENSMUSG00000033825	Tpsb2	2.35	10.65	4.53
ENSMUSG00000034339	Gm5689	21.89	97.53	4.46
ENSMUSG00000028289	Epha7	2.57	11.21	4.36
ENSMUSG00000013643	Lypd8	1.9	8.27	4.35
ENSMUSG00000006342	Susd2	7.88	33.83	4.29
ENSMUSG00000039092	Sptlc3	13.19	56.08	4.25
ENSMUSG00000031709	Tbc1d9	2.97	12.55	4.23
ENSMUSG00000053897	Slc39a8	2.82	11.91	4.22
ENSMUSG00000032454	Rbp2	78.47	331.2	4.22
ENSMUSG00000041012	Cmtm8	1.81	7.62	4.21
ENSMUSG00000016918	Sulf1	1.23	5.16	4.2
ENSMUSG00000050762	Prss27	7.71	32.41	4.2
ENSMUSG00000070990	Foxe1	26.39	110.48	4.19
ENSMUSG00000050957	Insl6	4.63	19.21	4.15
ENSMUSG00000051367	Six1	1.36	5.55	4.08
ENSMUSG00000035305	Ror1	6.93	27.99	4.04
ENSMUSG00000028393	Alad	36.73	147.96	4.03
ENSMUSG00000028386	Slc46a2	2.03	8.15	4.01
ENSMUSG00000070644	Etnk2	31.87	126.68	3.97
ENSMUSG00000021456	Fbp2	5.42	21.3	3.93
ENSMUSG00000025407	Gli1	13.64	53.46	3.92
ENSMUSG00000047143	Dmrta2	2.99	11.62	3.89
ENSMUSG00000030257	Srgap3	1.43	5.53	3.87
ENSMUSG00000029335	Bmp3	2.31	8.87	3.84
ENSMUSG00000039252	Lgi2	14.64	56.03	3.83
ENSMUSG00000042988	Notum	25.29	96.82	3.83
ENSMUSG00000037161	Mgarp	4.89	18.7	3.82
ENSMUSG00000046794	Ppp1r3b	8.32	31.59	3.8
ENSMUSG00000023968	Crip3	2.43	9.21	3.79
ENSMUSG00000043430	Psapl1	57.47	215.36	3.75
ENSMUSG00000020407	Upp1	3.4	12.65	3.72
ENSMUSG00000022330	Osr2	6.75	25.03	3.71
ENSMUSG00000026981	Il1rn	28.88	106.32	3.68
ENSMUSG00000061762	Tac1	1.61	5.91	3.67
ENSMUSG00000028494	Plin2	36.69	133.68	3.64
ENSMUSG00000033508	Asprv1	23.55	84.86	3.6
ENSMUSG00000006143	Upk3bl	46.95	167.9	3.58
ENSMUSG00000033308	Dpyd	4.05	14.36	3.55
ENSMUSG00000030303	Far2	1.78	6.31	3.54
ENSMUSG00000025432	Avil	4.12	14.57	3.54
ENSMUSG00000029602	Rasal1	8.83	31.05	3.52
ENSMUSG00000079025	Gsdmc	42.98	150.79	3.51
ENSMUSG00000026560	Fmo9	5.23	18.26	3.49
ENSMUSG00000037005	Xpnpep2	10.1	35.18	3.48
ENSMUSG00000023960	Enpp5	2.94	10.18	3.46
ENSMUSG00000050623	Tex40	4.67	16.09	3.45
ENSMUSG00000012123	Aim1l	104.56	354.68	3.39
ENSMUSG00000034362	Csta1	88.47	296	3.35
ENSMUSG00000020635	Fkbp1b	1.97	6.58	3.34
ENSMUSG00000090356	Teddm3	2.66	8.89	3.34
ENSMUSG00000023041	Krt6b	80.86	269.74	3.34
ENSMUSG00000038112	AW551984	2.68	8.89	3.32
ENSMUSG00000037035	Inhbb	3.33	11.06	3.32
ENSMUSG00000029378	Areg	7.31	24.1	3.3
ENSMUSG00000074207	Adh1	8.47	27.93	3.3
ENSMUSG00000035852	Misp	1.7	5.53	3.25
ENSMUSG00000048138	Dmrt2	2.13	6.92	3.25
ENSMUSG00000029154	Cwh43	10.45	33.86	3.24
ENSMUSG00000027377	Mall	44.21	141.93	3.21
ENSMUSG00000045136	Tubb2b	8.92	28.5	3.2
ENSMUSG00000021604	Irx4	6.5	20.58	3.17
ENSMUSG00000055652	Klhl25	7.73	24.51	3.17
ENSMUSG00000069917	Hba-a2	3.53	11.14	3.16
ENSMUSG00000050295	Foxc1	5.5	17.34	3.15
ENSMUSG00000028749	Pla2g2f	11.21	35.3	3.15
ENSMUSG00000022512	Cldn1	28.18	88.53	3.14
ENSMUSG00000021281	Tnfaip2	3.22	10.07	3.13
ENSMUSG00000044041	Krt13	9738.29	30522.7	3.13
ENSMUSG00000033520	Idi2	49.04	153.1	3.12
ENSMUSG00000028716	Pdzk1ip1	88.96	277.13	3.12
ENSMUSG00000042684	Npl	1.69	5.24	3.1
ENSMUSG00000022383	Ppara	2.17	6.72	3.1
ENSMUSG00000046834	Krt1	108.35	335	3.09
ENSMUSG00000037362	Nov	2.64	8.11	3.07
ENSMUSG00000075593	Gal3st4	3.27	10.03	3.07
ENSMUSG00000042249	Adrbk2	3.9	11.96	3.07
ENSMUSG00000029130	Rnf32	5.56	17.07	3.07
ENSMUSG00000052572	Dlg2	7.89	24.15	3.06
ENSMUSG00000030873	Scnn1b	3.56	10.81	3.04
ENSMUSG00000026535	Ifi202b	21.2	64.52	3.04
ENSMUSG00000032064	Dixdc1	2.72	8.23	3.03
ENSMUSG00000057719	Sh3rf2	19.26	58.43	3.03
ENSMUSG00000028943	Espn	3.21	9.69	3.02
ENSMUSG00000027347	Rasgrp1	3.75	11.27	3.01
ENSMUSG00000003051	Elf3	38.25	114.93	3
ENSMUSG00000055976	Cldn23	3.01	9	2.99
ENSMUSG00000021338	Lrrc16a	16.34	48.91	2.99
ENSMUSG00000061132	Blnk	3.4	10.07	2.96
ENSMUSG00000029120	Ppp2r2c	18.12	53.56	2.96
ENSMUSG00000027890	Gstm4	3.34	9.86	2.95
ENSMUSG00000036273	Lrrk2	4.41	13	2.95
ENSMUSG00000027463	Slc52a3	12.86	37.8	2.94
ENSMUSG00000043004	Gng2	13.89	40.71	2.93
ENSMUSG00000021466	Ptch1	38.38	112.61	2.93
ENSMUSG00000069919	Hba-a1	12.5	36.56	2.92
ENSMUSG00000042734	Ttc9	10.09	29.35	2.91
ENSMUSG00000072812	Ahnak2	17.84	51.66	2.9
ENSMUSG00000026879	Gsn	266.64	773.95	2.9
ENSMUSG00000022231	Sema5a	4.39	12.66	2.88
ENSMUSG00000045871	Slitrk6	5.06	14.58	2.88
ENSMUSG00000039328	Rnf122	12.44	35.83	2.88
ENSMUSG00000052974	Cyp2f2	379.31	1091.09	2.88
ENSMUSG00000069721	Krtap3-2	3.63	10.42	2.87
ENSMUSG00000042686	Jph1	2.16	6.17	2.86
ENSMUSG00000026304	Rab17	2.32	6.63	2.86
ENSMUSG00000021565	Slc6a19	3.04	8.68	2.86
ENSMUSG00000030793	Pycard	63.01	180.42	2.86
ENSMUSG00000030287	Itpr2	12.74	36.3	2.85
ENSMUSG00000001473	Tubb6	33.58	95.53	2.84
ENSMUSG00000031298	Gpr64	4.02	11.36	2.83
ENSMUSG00000078954	Arhgap8	4.94	13.96	2.83
ENSMUSG00000032202	Rab27a	8.04	22.71	2.82
ENSMUSG00000022018	Rgcc	18.35	51.68	2.82
ENSMUSG00000027639	Samhd1	31.81	89.77	2.82
ENSMUSG00000091376	Aadacl2	6	16.86	2.81
ENSMUSG00000054612	Mgmt	9.69	27.15	2.8
ENSMUSG00000000320	Alox12	28.12	78.72	2.8
ENSMUSG00000039232	Stx11	8.17	22.8	2.79
ENSMUSG00000030103	Bhlhe40	45.25	126.21	2.79
ENSMUSG00000021148	Gm9745	7.95	22.09	2.78
ENSMUSG00000052305	Hbb-bs	22.96	63.9	2.78
ENSMUSG00000052087	Rgs14	2.73	7.53	2.76
ENSMUSG00000063239	Grm4	4.51	12.46	2.76
ENSMUSG00000038057	Dbil5	4.37	12	2.75
ENSMUSG00000022469	Rapgef3	5.61	15.44	2.75
ENSMUSG00000000739	Sult5a1	85.75	235.41	2.75
ENSMUSG00000040280	Ndufa4l2	158.64	436.05	2.75
ENSMUSG00000048416	Mlf1	6.29	17.24	2.74
ENSMUSG00000018569	Cldn7	10.69	29.26	2.74
ENSMUSG00000059456	Ptk2b	12.54	34.35	2.74
ENSMUSG00000028893	Sesn2	5.67	15.48	2.73
ENSMUSG00000006218	Fam131c	3.43	9.32	2.72
ENSMUSG00000028607	Cpt2	15.97	43.43	2.72
ENSMUSG00000071858	Gm94	189.02	513.47	2.72
ENSMUSG00000071019	Sdr16c6	6.03	16.37	2.71
ENSMUSG00000044313	Mab21l3	1.95	5.27	2.7
ENSMUSG00000047907	Tshz2	4.21	11.37	2.7
ENSMUSG00000030137	Tuba8	7.84	21.13	2.7
ENSMUSG00000034765	Dusp5	14.83	39.88	2.69
ENSMUSG00000061517	Sox21	13.43	35.96	2.68
ENSMUSG00000050359	Sprr1a	397.32	1066.6	2.68
ENSMUSG00000016758	Bik	2.24	5.99	2.67
ENSMUSG00000011632	Pinlyp	24.4	65.16	2.67
ENSMUSG00000029134	Plb1	97.43	260.6	2.67
ENSMUSG00000000216	Scnn1g	2.39	6.35	2.66
ENSMUSG00000025993	Slc40a1	6.91	18.3	2.65
ENSMUSG00000058672	Tubb2a	21.12	55.84	2.64
ENSMUSG00000022468	Endou	35.75	94.35	2.64
ENSMUSG00000039115	Itga9	2.35	6.19	2.63
ENSMUSG00000006269	Atp6v1b1	4.23	11.11	2.63
ENSMUSG00000004633	Chn2	2.55	6.67	2.62
ENSMUSG00000037025	Foxa2	2.66	6.98	2.62
ENSMUSG00000032348	Gsta4	202.76	531.66	2.62
ENSMUSG00000028341	Nr4a3	4.48	11.69	2.61
ENSMUSG00000037852	Cpe	27.86	72.82	2.61
ENSMUSG00000028184	Lphn2	34.81	90.91	2.61
ENSMUSG00000024331	Dsc2	353.11	923.01	2.61
ENSMUSG00000068245	Phf11d	3.26	8.49	2.6
ENSMUSG00000018126	Baiap2l2	12.66	32.92	2.6
ENSMUSG00000069441	Dsg1a	133.37	344.84	2.59
ENSMUSG00000024778	Fas	2.03	5.24	2.58
ENSMUSG00000031438	Rnf128	2.47	6.38	2.58
ENSMUSG00000013766	Ly6g6e	79.4	204.97	2.58
ENSMUSG00000040856	Dlk1	287.9	741.86	2.58
ENSMUSG00000060780	Lrrtm1	2.58	6.63	2.57
ENSMUSG00000022421	Nptxr	6.39	16.41	2.57
ENSMUSG00000029832	Nfe2l3	14.36	36.92	2.57
ENSMUSG00000046971	Pla2g4f	23.6	60.62	2.57
ENSMUSG00000062345	Serpinb2	81.02	208.14	2.57
ENSMUSG00000030747	Dgat2	52.08	133.27	2.56
ENSMUSG00000003469	Phyhip	52.21	133.71	2.56
ENSMUSG00000079644	Gm1110	2.64	6.74	2.55
ENSMUSG00000028392	Bspry	22.64	57.81	2.55
ENSMUSG00000072572	Slc39a2	3.26	8.24	2.53
ENSMUSG00000028539	Artn	10.73	27.11	2.53
ENSMUSG00000001123	Lgals9	15.36	38.83	2.53
ENSMUSG00000037868	Egr2	24.27	61.31	2.53
ENSMUSG00000017144	Rnd3	99.48	251.28	2.53
ENSMUSG00000028536	2610528J11Rik	13.9	35.05	2.52
ENSMUSG00000039457	Ppl	95.47	240.76	2.52
ENSMUSG00000000732	Icosl	2.45	6.15	2.51
ENSMUSG00000020847	Rph3al	5.24	13.15	2.51
ENSMUSG00000015093	Clic3	182.85	459.69	2.51
ENSMUSG00000097327	E030030I06Rik	7.3	18.23	2.5
ENSMUSG00000027913	Crct1	10.43	25.98	2.49
ENSMUSG00000035000	Dpp4	4.49	11.14	2.48
ENSMUSG00000020186	Csrp2	39.55	97.98	2.48
ENSMUSG00000029804	Herc3	2.92	7.21	2.47
ENSMUSG00000032380	Dapk2	13.87	34.22	2.47
ENSMUSG00000037577	Ephx3	18.92	46.5	2.46
ENSMUSG00000028544	Slc5a9	9.01	22.06	2.45
ENSMUSG00000027533	Fabp5	178.13	434.32	2.44
ENSMUSG00000061751	Kalrn	4.07	9.87	2.43
ENSMUSG00000026342	Slc35f5	19.47	47.26	2.43
ENSMUSG00000022218	Tgm1	128.04	310.62	2.43
ENSMUSG00000096001	2610528A11Rik	801.28	1948.48	2.43
ENSMUSG00000034919	Ttc22	21.44	51.86	2.42
ENSMUSG00000026185	Igfbp5	102.65	248.69	2.42
ENSMUSG00000006777	Krt23	182.94	442.93	2.42
ENSMUSG00000017204	Gsdma	7.63	18.4	2.41
ENSMUSG00000053062	Jam2	2.91	6.99	2.4
ENSMUSG00000048482	Bdnf	3.81	9.06	2.38
ENSMUSG00000031485	Prosc	26.28	62.5	2.38
ENSMUSG00000034744	Nagk	34.77	82.44	2.37
ENSMUSG00000054752	Fsd1l	2.28	5.39	2.36
ENSMUSG00000025997	Ikzf2	10.97	25.94	2.36
ENSMUSG00000053559	Smagp	27.16	64.03	2.36
ENSMUSG00000032278	Paqr5	52.53	124.05	2.36
ENSMUSG00000048721	Fndc9	2.19	5.14	2.35
ENSMUSG00000060621	Nkpd1	6.6	15.52	2.35
ENSMUSG00000029581	Fscn1	54.86	128.89	2.35
ENSMUSG00000036242	3632451O06Rik	3.37	7.88	2.34
ENSMUSG00000040875	Osbpl10	3.84	8.98	2.34
ENSMUSG00000033488	BC026585	5.37	12.57	2.34
ENSMUSG00000073987	Ggh	54.79	128.33	2.34
ENSMUSG00000005355	Casp14	4.19	9.76	2.33
ENSMUSG00000053846	Lipg	8.14	18.94	2.33
ENSMUSG00000027210	Meis2	107.02	249.75	2.33
ENSMUSG00000032238	Rora	7.22	16.75	2.32
ENSMUSG00000000385	Tmprss2	7.72	17.92	2.32
ENSMUSG00000020405	Fabp6	13.97	32.36	2.32
ENSMUSG00000070604	Vsig10l	26.7	61.95	2.32
ENSMUSG00000030790	Adm	40.82	94.82	2.32
ENSMUSG00000027555	Car13	59.35	137.59	2.32
ENSMUSG00000054905	Stfa3	32.57	75.28	2.31
ENSMUSG00000058057	Mettl7a3	2.21	5.05	2.29
ENSMUSG00000074093	Svip	2.95	6.75	2.29
ENSMUSG00000026110	Mgat4a	5.45	12.5	2.29
ENSMUSG00000060477	Irak2	8.22	18.8	2.29
ENSMUSG00000028713	Cyp4b1	11.29	25.84	2.29
ENSMUSG00000062908	Acadm	69.79	159.73	2.29
ENSMUSG00000063651	Cnfn	354.63	811.27	2.29
ENSMUSG00000032715	Trib3	3.64	8.29	2.28
ENSMUSG00000049382	Krt8	12.2	27.85	2.28
ENSMUSG00000019528	Gyg	14.91	34	2.28
ENSMUSG00000045502	Hcar2	20.63	47.13	2.28
ENSMUSG00000018899	Irf1	34.79	79.39	2.28
ENSMUSG00000049436	Upk1b	5.61	12.73	2.27
ENSMUSG00000028894	Inpp5b	53.03	120.19	2.27
ENSMUSG00000046352	Gjb2	60.12	136.64	2.27
ENSMUSG00000042207	Kdm5b	61.41	139.21	2.27
ENSMUSG00000030110	Ret	2.23	5.03	2.26
ENSMUSG00000022996	Wnt10b	4.21	9.51	2.26
ENSMUSG00000036395	Glb1l2	4.95	11.19	2.26
ENSMUSG00000031700	Gpt2	9.09	20.58	2.26
ENSMUSG00000040699	Limd2	10.24	23.13	2.26
ENSMUSG00000044594	Serpinb3a	387.52	876.68	2.26
ENSMUSG00000075296	Aldh3b2	53.32	119.88	2.25
ENSMUSG00000059956	Serpinb12	138.92	312.76	2.25
ENSMUSG00000021636	Marveld2	4.34	9.7	2.24
ENSMUSG00000034917	Tjp3	9.52	21.33	2.24
ENSMUSG00000002289	Angptl4	10.65	23.89	2.24
ENSMUSG00000042073	Abhd14b	29.56	66.25	2.24
ENSMUSG00000020717	Pecam1	2.38	5.31	2.23
ENSMUSG00000019832	Rab32	6.71	14.94	2.23
ENSMUSG00000026107	Nabp1	6.93	15.44	2.23
ENSMUSG00000035273	Hpse	2.6	5.77	2.22
ENSMUSG00000043668	Tox3	5.05	11.22	2.22
ENSMUSG00000073802	Cdkn2b	5.62	12.46	2.22
ENSMUSG00000001542	Ell2	25.76	57.13	2.22
ENSMUSG00000040703	Cyp2s1	26.12	58.08	2.22
ENSMUSG00000047443	Fam132b	3.96	8.75	2.21
ENSMUSG00000046589	Lrrc8e	11.21	24.82	2.21
ENSMUSG00000050854	Tmem125	25.48	56.41	2.21
ENSMUSG00000028019	Pdgfc	3.04	6.69	2.2
ENSMUSG00000003555	Cyp17a1	3.1	6.81	2.2
ENSMUSG00000029217	Tec	3.23	7.1	2.2
ENSMUSG00000032717	Mdfi	58.55	128.68	2.2
ENSMUSG00000020905	Usp43	7.68	16.84	2.19
ENSMUSG00000036155	Mgat5	11.38	24.94	2.19
ENSMUSG00000024912	Fosl1	47.15	103.05	2.19
ENSMUSG00000038422	Hdhd3	5.29	11.48	2.17
ENSMUSG00000031488	Rab11fip1	7.12	15.42	2.17
ENSMUSG00000024378	Stard4	11.22	24.39	2.17
ENSMUSG00000069808	Fam57a	182.36	395.3	2.17
ENSMUSG00000036902	Neto2	4.33	9.36	2.16
ENSMUSG00000030792	Dkkl1	10.9	23.54	2.16
ENSMUSG00000031214	Ophn1	16.9	36.43	2.16
ENSMUSG00000038068	Rnf144b	23.93	51.67	2.16
ENSMUSG00000039208	Metrnl	42.43	91.45	2.16
ENSMUSG00000020911	Krt19	65.3	140.97	2.16
ENSMUSG00000023039	Krt7	87.27	188.19	2.16
ENSMUSG00000027315	Spint1	88.5	191.22	2.16
ENSMUSG00000022037	Clu	131.55	284.22	2.16
ENSMUSG00000064246	Chil1	2.49	5.36	2.15
ENSMUSG00000038213	Tapbpl	4.04	8.69	2.15
ENSMUSG00000056671	Prelid2	5.66	12.16	2.15
ENSMUSG00000047040	Prr15l	5.17	11.05	2.14
ENSMUSG00000028555	Ttc39a	6.99	14.97	2.14
ENSMUSG00000036053	Fmnl2	10.12	21.7	2.14
ENSMUSG00000057315	Arhgap24	15.16	32.42	2.14
ENSMUSG00000025791	Pgm2	17.66	37.86	2.14
ENSMUSG00000058454	Dhcr7	49.81	106.41	2.14
ENSMUSG00000022123	Scel	62.4	133.46	2.14
ENSMUSG00000021025	Nfkbia	261.29	559.66	2.14
ENSMUSG00000005054	Cstb	302.12	647.8	2.14
ENSMUSG00000039253	Fn3krp	4.52	9.62	2.13
ENSMUSG00000026473	Glul	285.98	607.85	2.13
ENSMUSG00000022952	Runx1	2.93	6.21	2.12
ENSMUSG00000046733	Gprc5a	19.86	42.12	2.12
ENSMUSG00000045294	Insig1	22.08	46.82	2.12
ENSMUSG00000040713	Creg1	40.34	85.67	2.12
ENSMUSG00000034226	Rhov	49.56	104.97	2.12
ENSMUSG00000069255	Dusp22	68.22	144.48	2.12
ENSMUSG00000004661	Arid3b	2.8	5.89	2.1
ENSMUSG00000021763	BC067074	3.17	6.67	2.1
ENSMUSG00000013846	St3gal1	5.42	11.39	2.1
ENSMUSG00000002266	Zim1	15.44	32.45	2.1
ENSMUSG00000046223	Plaur	19.86	41.62	2.1
ENSMUSG00000020902	Ntn1	2.82	5.89	2.09
ENSMUSG00000014725	Adam28	4.47	9.34	2.09
ENSMUSG00000042770	Hebp1	7.14	14.89	2.09
ENSMUSG00000038600	Atp6v0a4	7.76	16.21	2.09
ENSMUSG00000096215	Smim22	12.13	25.36	2.09
ENSMUSG00000032648	Pygm	4.4	9.16	2.08
ENSMUSG00000042244	Pglyrp3	9.19	19.14	2.08
ENSMUSG00000009772	Nuak2	30.2	62.77	2.08
ENSMUSG00000022180	Slc7a8	30.43	63.36	2.08
ENSMUSG00000041939	Mvk	80.74	167.69	2.08
ENSMUSG00000067929	Gm10226	3.85	7.97	2.07
ENSMUSG00000022574	Naprt	7.41	15.36	2.07
ENSMUSG00000053886	Sh2d4a	10.6	21.91	2.07
ENSMUSG00000038893	Fam117a	14.47	30.01	2.07
ENSMUSG00000021747	4930452B06Rik	3.49	7.19	2.06
ENSMUSG00000063954	Hist2h2aa1	9.65	19.92	2.06
ENSMUSG00000036880	Acaa2	224.88	462.24	2.06
ENSMUSG00000039007	Cpq	4.16	8.54	2.05
ENSMUSG00000021457	Syk	6.22	12.78	2.05
ENSMUSG00000030800	Prss8	10.42	21.33	2.05
ENSMUSG00000025059	Gyk	26.75	54.72	2.05
ENSMUSG00000022893	Adamts1	67.64	138.54	2.05
ENSMUSG00000025372	Baiap2	182.66	375.13	2.05
ENSMUSG00000000078	Klf6	217.78	445.62	2.05
ENSMUSG00000038578	Susd1	4.26	8.68	2.04
ENSMUSG00000041135	Ripk2	6.1	12.45	2.04
ENSMUSG00000040181	Fmo1	6.62	13.48	2.04
ENSMUSG00000079144	A130010J15Rik	13.68	27.87	2.04
ENSMUSG00000066152	Slc31a2	16.55	33.72	2.04
ENSMUSG00000067071	Hes6	35.83	73.23	2.04
ENSMUSG00000006378	Gcat	73.75	150.76	2.04
ENSMUSG00000031372	Trex2	4.86	9.88	2.03
ENSMUSG00000051043	Gprc5c	5.14	10.41	2.03
ENSMUSG00000047712	Ust	8.49	17.27	2.03
ENSMUSG00000034308	Sdr42e1	13.83	28.12	2.03
ENSMUSG00000040471	Ggt6	32.41	65.82	2.03
ENSMUSG00000032224	Fam81a	3.95	7.98	2.02
ENSMUSG00000033857	Engase	8.17	16.51	2.02
ENSMUSG00000026983	Il1f5	8.22	16.6	2.02
ENSMUSG00000039062	Anpep	28.81	58.24	2.02
ENSMUSG00000030471	Zdhhc13	29.07	58.74	2.02
ENSMUSG00000064215	Ifi27	45.31	91.53	2.02
ENSMUSG00000032193	Ldlr	66.24	133.86	2.02
ENSMUSG00000010660	Plcd1	85.79	173.14	2.02
ENSMUSG00000031558	Slit2	4.04	8.11	2.01
ENSMUSG00000060716	Plekhh1	4.73	9.53	2.01
ENSMUSG00000071369	Map3k5	6.06	12.21	2.01
ENSMUSG00000027227	Sord	17.05	34.25	2.01
ENSMUSG00000032068	Plet1	27.2	54.76	2.01
ENSMUSG00000037211	Spry1	60.94	122.66	2.01
ENSMUSG00000018796	Acsl1	106.02	213.24	2.01
ENSMUSG00000034282	Evpl	140.91	282.81	2.01
ENSMUSG00000031661	Nkd1	3.84	7.68	2
ENSMUSG00000025324	Atp10a	10.54	21.11	2
ENSMUSG00000031483	Erlin2	43.75	87.65	2
ENSMUSG00000061126	Cyp4f39	64.53	128.78	2
ENSMUSG00000047501	Cldn4	163.58	327.63	2
ENSMUSG00000029236	Nmu	3.43	6.83	1.99
ENSMUSG00000025473	Adam8	4.19	8.33	1.99
ENSMUSG00000045954	Sdpr	5.59	11.14	1.99
ENSMUSG00000000531	Grasp	9.95	19.76	1.99
ENSMUSG00000021591	Glrx	20.53	40.82	1.99
ENSMUSG00000020737	Hn1	159.15	316.87	1.99
ENSMUSG00000051022	Hs3st1	4.01	7.94	1.98
ENSMUSG00000047686	Zcchc5	12.37	24.51	1.98
ENSMUSG00000028621	Cyb5rl	17.33	34.38	1.98
ENSMUSG00000026317	Cln8	21.48	42.5	1.98
ENSMUSG00000081683	Fzd10	17.64	34.67	1.97
ENSMUSG00000027298	Tyro3	41.39	81.44	1.97
ENSMUSG00000022351	Sqle	56.42	111.04	1.97
ENSMUSG00000037940	Inpp4b	3.58	7.01	1.96
ENSMUSG00000053641	Dennd4a	3.64	7.15	1.96
ENSMUSG00000001249	Hpn	13.31	26.04	1.96
ENSMUSG00000024521	Pmaip1	20.12	39.51	1.96
ENSMUSG00000056666	Retsat	22.02	43.25	1.96
ENSMUSG00000024511	Rab27b	27.86	54.62	1.96
ENSMUSG00000045573	Penk	46.66	91.58	1.96
ENSMUSG00000006445	Epha2	73.16	143.29	1.96
ENSMUSG00000001025	S100a6	702.85	1375.74	1.96
ENSMUSG00000027499	Pkia	3.33	6.49	1.95
ENSMUSG00000056071	S100a9	3.41	6.66	1.95
ENSMUSG00000040339	Fam102b	8.33	16.28	1.95
ENSMUSG00000039529	Atp8b1	8.64	16.84	1.95
ENSMUSG00000056116	H2-T22	16.36	31.91	1.95
ENSMUSG00000005483	Dnajb1	364.85	712.52	1.95
ENSMUSG00000038178	Slc43a2	2.65	5.15	1.94
ENSMUSG00000032718	Mansc1	3.75	7.29	1.94
ENSMUSG00000059327	Eda	5.94	11.51	1.94
ENSMUSG00000036960	Clca5	18.72	36.35	1.94
ENSMUSG00000039145	Camk1d	19.32	37.53	1.94
ENSMUSG00000039616	Mocos	24.8	48.12	1.94
ENSMUSG00000027710	Acad9	26.93	52.36	1.94
ENSMUSG00000034855	Cxcl10	40.06	77.66	1.94
ENSMUSG00000031604	Msmo1	88.68	172.43	1.94
ENSMUSG00000034795	Ccdc122	3.95	7.62	1.93
ENSMUSG00000036931	Nfkbid	7.76	14.94	1.93
ENSMUSG00000062646	Ganc	7.83	15.12	1.93
ENSMUSG00000022595	Lypd2	18.08	34.81	1.93
ENSMUSG00000034936	Arl4d	40.38	77.88	1.93
ENSMUSG00000059743	Fdps	43.47	83.69	1.93
ENSMUSG00000035112	Wnk4	58.7	113.06	1.93
ENSMUSG00000003752	Itpkc	64.39	124.14	1.93
ENSMUSG00000022090	Pdlim2	85.22	164.73	1.93
ENSMUSG00000026166	Ccl20	3.15	6.04	1.92
ENSMUSG00000098923	Tmem185b	3.99	7.67	1.92
ENSMUSG00000095241	Gm5478	6.17	11.85	1.92
ENSMUSG00000026458	Ppfia4	6.9	13.24	1.92
ENSMUSG00000000253	Gmpr	9.45	18.1	1.92
ENSMUSG00000000416	Cttnbp2	9.72	18.65	1.92
ENSMUSG00000008090	Fgfrl1	13.42	25.73	1.92
ENSMUSG00000053702	Nebl	32.99	63.45	1.92
ENSMUSG00000045216	Hs6st1	108.96	209.58	1.92
ENSMUSG00000026202	Tuba4a	336.87	647.63	1.92
ENSMUSG00000074384	AI429214	4.53	8.67	1.91
ENSMUSG00000027171	Prrg4	15.2	29.04	1.91
ENSMUSG00000021573	Tppp	43.84	83.6	1.91
ENSMUSG00000030282	Cmas	58.26	110.99	1.91
ENSMUSG00000045394	Epcam	86.78	165.7	1.91
ENSMUSG00000005125	Ndrg1	90.23	172.77	1.91
ENSMUSG00000022756	Slc7a4	3.08	5.86	1.9
ENSMUSG00000042099	Kank3	10.4	19.8	1.9
ENSMUSG00000028479	Gne	15.4	29.28	1.9
ENSMUSG00000035441	Myo1d	17.72	33.63	1.9
ENSMUSG00000027459	Fam110a	20.82	39.48	1.9
ENSMUSG00000051517	Arhgef39	22.06	41.98	1.9
ENSMUSG00000017390	Aldoc	23.9	45.51	1.9
ENSMUSG00000074637	Sox2	59.02	112.3	1.9
ENSMUSG00000037188	Grhl3	88.63	168.1	1.9
ENSMUSG00000026796	Fam129b	261.13	495.22	1.9
ENSMUSG00000063362	Alg11	6.81	12.89	1.89
ENSMUSG00000004952	Rasa4	7.35	13.86	1.89
ENSMUSG00000028629	Exo5	8.02	15.16	1.89
ENSMUSG00000001053	N4bp3	19.63	37.04	1.89
ENSMUSG00000033684	Qsox1	22.1	41.66	1.89
ENSMUSG00000028647	Mycbp	44.42	83.81	1.89
ENSMUSG00000030630	Fah	17.78	33.51	1.88
ENSMUSG00000021947	Cryl1	42.2	79.19	1.88
ENSMUSG00000026605	Cenpf	42.37	79.65	1.88
ENSMUSG00000015357	Clpx	55.95	105.33	1.88
ENSMUSG00000021553	Slc28a3	2.85	5.33	1.87
ENSMUSG00000035164	Zc3h12c	9.4	17.59	1.87
ENSMUSG00000001156	Mxd1	10.37	19.37	1.87
ENSMUSG00000067219	Nipal1	12.25	22.93	1.87
ENSMUSG00000022265	Ank	22.8	42.66	1.87
ENSMUSG00000054619	Mettl7a1	33	61.67	1.87
ENSMUSG00000025950	Idh1	46.61	87.11	1.87
ENSMUSG00000028843	Sh3bgrl3	266.44	497.04	1.87
ENSMUSG00000020839	Tmigd1	5.08	9.46	1.86
ENSMUSG00000066191	Anks6	7.93	14.75	1.86
ENSMUSG00000037108	Zcwpw1	9.79	18.18	1.86
ENSMUSG00000042289	Hsd3b7	13.76	25.65	1.86
ENSMUSG00000034320	Slc26a2	17.75	32.98	1.86
ENSMUSG00000056078	Lipm	18.84	35.02	1.86
ENSMUSG00000025981	Coq10b	21.9	40.65	1.86
ENSMUSG00000026939	Tmem141	40.98	76.03	1.86
ENSMUSG00000034926	Dhcr24	41.73	77.52	1.86
ENSMUSG00000045667	Smtnl2	58.17	108.23	1.86
ENSMUSG00000026819	Slc25a25	76.69	142.37	1.86
ENSMUSG00000022817	Itgb5	83.89	155.84	1.86
ENSMUSG00000057454	Lypd3	517.76	964.59	1.86
ENSMUSG00000027078	Ube2l6	3.76	6.95	1.85
ENSMUSG00000074489	Bglap3	8.46	15.63	1.85
ENSMUSG00000043895	S1pr2	11.44	21.18	1.85
ENSMUSG00000025555	Farp1	14.91	27.54	1.85
ENSMUSG00000039206	Daglb	20.48	37.99	1.85
ENSMUSG00000067714	Lpar5	23.24	42.94	1.85
ENSMUSG00000035064	Eef2k	113.11	209.51	1.85
ENSMUSG00000033029	1700088E04Rik	3.53	6.49	1.84
ENSMUSG00000033174	Mgll	21.17	39.01	1.84
ENSMUSG00000043782	Ccdc64b	31.6	57.99	1.84
ENSMUSG00000003271	Sult2b1	97.07	178.25	1.84
ENSMUSG00000006411	Pvrl4	106.93	196.96	1.84
ENSMUSG00000032281	Acsbg1	138.58	255.6	1.84
ENSMUSG00000039942	Ptger4	3.07	5.61	1.83
ENSMUSG00000071604	Fam189a2	3.55	6.5	1.83
ENSMUSG00000025867	Cplx2	8.01	14.63	1.83
ENSMUSG00000033998	Kcnk1	11.21	20.47	1.83
ENSMUSG00000025779	Ly96	11.4	20.9	1.83
ENSMUSG00000066595	Mfsd7b	13.89	25.35	1.83
ENSMUSG00000021638	Ocln	16.28	29.86	1.83
ENSMUSG00000030587	2200002D01Rik	22.17	40.65	1.83
ENSMUSG00000025277	Abhd6	23.12	42.33	1.83
ENSMUSG00000024486	Hbegf	49.21	90.1	1.83
ENSMUSG00000029560	Snx8	2.98	5.42	1.82
ENSMUSG00000003746	Man1a	5.14	9.35	1.82
ENSMUSG00000038576	Susd4	7.01	12.79	1.82
ENSMUSG00000060675	Pla2g16	11.02	20.02	1.82
ENSMUSG00000034981	Parm1	15.14	27.53	1.82
ENSMUSG00000001665	Gstt3	18.49	33.6	1.82
ENSMUSG00000055301	Adh7	18.74	34.2	1.82
ENSMUSG00000024525	Impa2	24.94	45.46	1.82
ENSMUSG00000029380	Cxcl1	28.4	51.55	1.82
ENSMUSG00000040867	Begain	28.77	52.4	1.82
ENSMUSG00000072214	2019-09-05	77.44	141.22	1.82
ENSMUSG00000020592	Sdc1	564.63	1029.51	1.82
ENSMUSG00000031129	Slc9a9	4	7.26	1.81
ENSMUSG00000027605	Acss2	5.34	9.64	1.81
ENSMUSG00000050761	Gp1bb	5.54	10.04	1.81
ENSMUSG00000056267	Cep70	13.98	25.28	1.81
ENSMUSG00000024642	Tle4	19.53	35.36	1.81
ENSMUSG00000028865	Cd164l2	27.02	48.82	1.81
ENSMUSG00000027293	Ehd4	30.84	55.77	1.81
ENSMUSG00000032254	Kif23	41.75	75.76	1.81
ENSMUSG00000056313	1810011O10Rik	42.46	76.8	1.81
ENSMUSG00000035557	Krt17	2237.6	4039.9	1.81
ENSMUSG00000040978	Gm11992	2.83	5.09	1.8
ENSMUSG00000041617	Ccdc74a	5.88	10.59	1.8
ENSMUSG00000035473	Galm	6.49	11.65	1.8
ENSMUSG00000039384	Dusp10	9.3	16.78	1.8
ENSMUSG00000024512	Dynap	15.02	27.08	1.8
ENSMUSG00000035863	Palm	22.68	40.92	1.8
ENSMUSG00000024922	Ovol1	54.75	98.74	1.8
ENSMUSG00000027984	Hadh	197.58	354.82	1.8
ENSMUSG00000041361	Myzap	3.78	6.75	1.79
ENSMUSG00000028100	Nudt17	5.77	10.33	1.79
ENSMUSG00000002227	Mov10	6.25	11.18	1.79
ENSMUSG00000027695	Pld1	9.57	17.16	1.79
ENSMUSG00000024235	Map3k8	10.42	18.6	1.79
ENSMUSG00000026854	Usp20	29.45	52.75	1.79
ENSMUSG00000021701	Plk2	55.7	99.64	1.79
ENSMUSG00000008601	Rab25	505.23	904.02	1.79
ENSMUSG00000027995	Tlr2	3.35	5.95	1.78
ENSMUSG00000035184	Fam124a	4.73	8.43	1.78
ENSMUSG00000034271	Jdp2	8.76	15.61	1.78
ENSMUSG00000054509	Parp4	9.67	17.17	1.78
ENSMUSG00000052819	Best2	10.34	18.36	1.78
ENSMUSG00000031387	Renbp	12.69	22.59	1.78
ENSMUSG00000025171	Ubtd1	21.58	38.48	1.78
ENSMUSG00000072949	Acot1	22.85	40.71	1.78
ENSMUSG00000064063	BC048507	31.64	56.21	1.78
ENSMUSG00000031734	Irx3	3.11	5.51	1.77
ENSMUSG00000027859	Ngf	8.04	14.27	1.77
ENSMUSG00000030946	Lhpp	8.91	15.73	1.77
ENSMUSG00000031066	Usp11	10.73	19	1.77
ENSMUSG00000028236	Sdr16c5	11.24	19.95	1.77
ENSMUSG00000020230	Prmt2	13.05	23.08	1.77
ENSMUSG00000047115	Fam221a	21.76	38.49	1.77
ENSMUSG00000019853	Hebp2	30.93	54.84	1.77
ENSMUSG00000036775	Decr2	35.84	63.6	1.77
ENSMUSG00000032501	Trib1	41.53	73.48	1.77
ENSMUSG00000005973	Rcn1	55.47	98.37	1.77
ENSMUSG00000078816	Prkcg	4.2	7.41	1.76
ENSMUSG00000026471	Mr1	5.2	9.16	1.76
ENSMUSG00000034245	Hdac11	5.85	10.3	1.76
ENSMUSG00000039646	Vasn	7.58	13.33	1.76
ENSMUSG00000036452	Arhgap26	14.2	24.94	1.76
ENSMUSG00000041757	Plekha6	20.28	35.74	1.76
ENSMUSG00000048707	Tprn	24.88	43.69	1.76
ENSMUSG00000024659	Anxa1	1554.76	2734.25	1.76
ENSMUSG00000034639	Setmar	4.07	7.13	1.75
ENSMUSG00000024866	Acy3	4.25	7.42	1.75
ENSMUSG00000091017	Fam71a	4.44	7.76	1.75
ENSMUSG00000078350	Smim1	7.07	12.34	1.75
ENSMUSG00000027115	Kif18a	7.27	12.74	1.75
ENSMUSG00000006519	Cyba	9.58	16.76	1.75
ENSMUSG00000009418	Nav1	17.03	29.76	1.75
ENSMUSG00000031647	Mfap3l	18.83	32.95	1.75
ENSMUSG00000001348	Acp5	28.26	49.33	1.75
ENSMUSG00000068874	Selenbp1	43.41	76.06	1.75
ENSMUSG00000056498	Tmem154	47.32	82.68	1.75
ENSMUSG00000032515	Csrnp1	58.09	101.63	1.75
ENSMUSG00000027952	Pmvk	59.78	104.4	1.75
ENSMUSG00000024308	Tapbp	107.76	188.93	1.75
ENSMUSG00000078144	Capns2	160.88	281.67	1.75
ENSMUSG00000004771	Rab11a	647.73	1133.13	1.75
ENSMUSG00000043857	Mgat5b	3.88	6.74	1.74
ENSMUSG00000043811	Rtn4r	4.92	8.58	1.74
ENSMUSG00000104217	RP24-426M1.3	5.1	8.87	1.74
ENSMUSG00000001240	Ramp2	5.62	9.77	1.74
ENSMUSG00000023918	Gpr115	6.34	11.03	1.74
ENSMUSG00000048772	Tmem53	6.55	11.38	1.74
ENSMUSG00000026383	Epb4.1l5	10.63	18.46	1.74
ENSMUSG00000037661	Gpr160	11.35	19.7	1.74
ENSMUSG00000031955	Bcar1	20.91	36.39	1.74
ENSMUSG00000041845	Rhod	34.96	60.96	1.74
ENSMUSG00000019066	Rab3d	95.82	166.96	1.74
ENSMUSG00000030157	Clec2d	8.39	14.5	1.73
ENSMUSG00000029722	Agfg2	10.85	18.74	1.73
ENSMUSG00000020469	Myl7	14.86	25.67	1.73
ENSMUSG00000032591	Mst1	26.13	45.11	1.73
ENSMUSG00000033088	Triobp	38.25	66.1	1.73
ENSMUSG00000074604	Mgst2	74.75	129.13	1.73
ENSMUSG00000025198	Erlin1	86.84	150.1	1.73
ENSMUSG00000004951	Hspb1	574.74	996.17	1.73
ENSMUSG00000014846	Tppp3	875.52	1513.09	1.73
ENSMUSG00000032265	Fam46a	3.19	5.49	1.72
ENSMUSG00000023882	Zfp54	3.31	5.7	1.72
ENSMUSG00000020268	Lyrm7	3.53	6.08	1.72
ENSMUSG00000021070	Bdkrb2	3.94	6.79	1.72
ENSMUSG00000038037	Socs1	5.45	9.4	1.72
ENSMUSG00000041920	Slc16a6	8.36	14.41	1.72
ENSMUSG00000020838	Slc6a4	9.5	16.34	1.72
ENSMUSG00000016520	Lnx2	22.32	38.28	1.72
ENSMUSG00000030867	Plk1	26.02	44.72	1.72
ENSMUSG00000038963	Slco4a1	27.08	46.64	1.72
ENSMUSG00000029073	Cptp	27.78	47.73	1.72
ENSMUSG00000040506	Ambra1	32.79	56.4	1.72
ENSMUSG00000034993	Vat1	63.88	110	1.72
ENSMUSG00000006398	Cdc20	69.01	118.93	1.72
ENSMUSG00000032420	Nt5e	109.01	187.02	1.72
ENSMUSG00000025068	Gsto1	733.02	1261.22	1.72
ENSMUSG00000074457	S100a16	1109.44	1910.57	1.72
ENSMUSG00000053654	Krt42	3.07	5.26	1.71
ENSMUSG00000021226	Acot2	4.39	7.5	1.71
ENSMUSG00000068876	Cgn	9.1	15.6	1.71
ENSMUSG00000044244	Il20rb	10.72	18.36	1.71
ENSMUSG00000021203	Otub2	10.97	18.78	1.71
ENSMUSG00000023092	Fhl1	18.81	32.08	1.71
ENSMUSG00000031381	Piga	24.19	41.25	1.71
ENSMUSG00000020444	Guk1	83.05	142.09	1.71
ENSMUSG00000029642	Polr1d	149.27	254.59	1.71
ENSMUSG00000044469	Tnfaip8l1	3.23	5.48	1.7
ENSMUSG00000070576	Mn1	3.46	5.87	1.7
ENSMUSG00000061723	Tnnt3	5.05	8.58	1.7
ENSMUSG00000018334	Ksr1	5.54	9.44	1.7
ENSMUSG00000024892	Pcx	7.65	13.04	1.7
ENSMUSG00000033453	Adamts15	13.05	22.16	1.7
ENSMUSG00000019872	Smpdl3a	20.9	35.45	1.7
ENSMUSG00000028035	Dnajb4	43.44	74.01	1.7
ENSMUSG00000032285	Dnaja4	52.85	90.04	1.7
ENSMUSG00000026003	Acadl	69.85	118.52	1.7
ENSMUSG00000032092	Mpzl2	81.94	139.53	1.7
ENSMUSG00000037361	Sf3b6	134.78	229.18	1.7
ENSMUSG00000027447	Cst3	650.22	1104.14	1.7
ENSMUSG00000060962	Dmkn	2018.86	3426.43	1.7
ENSMUSG00000074218	Cox7a1	4.03	6.81	1.69
ENSMUSG00000044551	9930012K11Rik	4.3	7.25	1.69
ENSMUSG00000079605	Zbtb9	4.36	7.37	1.69
ENSMUSG00000047963	Stbd1	4.65	7.85	1.69
ENSMUSG00000029699	Ssc4d	4.84	8.18	1.69
ENSMUSG00000026094	Stk17b	7.64	12.9	1.69
ENSMUSG00000029270	Fam69a	10.03	17	1.69
ENSMUSG00000041440	Gk5	10.87	18.4	1.69
ENSMUSG00000028545	Bend5	11.16	18.89	1.69
ENSMUSG00000023004	Tuba1b	21.1	35.57	1.69
ENSMUSG00000037049	Smpd1	21.79	36.82	1.69
ENSMUSG00000056749	Nfil3	30.88	52.27	1.69
ENSMUSG00000001467	Cyp51	50.73	85.64	1.69
ENSMUSG00000038332	Sesn1	54.71	92.33	1.69
ENSMUSG00000051225	Fam83a	112.06	188.83	1.69
ENSMUSG00000019942	Cdk1	141.58	239.49	1.69
ENSMUSG00000032231	Anxa2	2102.69	3558.55	1.69
ENSMUSG00000041423	Paqr6	4.17	7.01	1.68
ENSMUSG00000033952	Aspm	8.88	14.88	1.68
ENSMUSG00000038775	Vill	12.33	20.74	1.68
ENSMUSG00000078670	Fam174b	15.67	26.28	1.68
ENSMUSG00000006517	Mvd	16.43	27.61	1.68
ENSMUSG00000049313	Sorl1	36.47	61.29	1.68
ENSMUSG00000022867	Usp25	49.73	83.4	1.68
ENSMUSG00000005251	Ripk4	54.57	91.62	1.68
ENSMUSG00000028048	Gba	89.24	149.71	1.68
ENSMUSG00000056632	Dsg3	239.68	402.28	1.68
ENSMUSG00000034634	Ly6d	2222.86	3738.43	1.68
ENSMUSG00000057933	Gsta2	4.93	8.24	1.67
ENSMUSG00000098549	Gm5269	9.53	15.96	1.67
ENSMUSG00000021367	Edn1	12.19	20.37	1.67
ENSMUSG00000037321	Tap1	24.56	41.01	1.67
ENSMUSG00000024747	Aldh1a7	24.97	41.79	1.67
ENSMUSG00000035637	Grhpr	29.36	49.04	1.67
ENSMUSG00000026121	Sema4c	34.54	57.77	1.67
ENSMUSG00000046324	Ermp1	47.9	79.79	1.67
ENSMUSG00000027306	Nusap1	49.72	83.05	1.67
ENSMUSG00000044948	Cfap43	55.49	92.82	1.67
ENSMUSG00000022382	Wnt7b	70.46	117.55	1.67
ENSMUSG00000028961	Pgd	102.93	171.87	1.67
ENSMUSG00000038807	Rap1gap2	3.36	5.59	1.66
ENSMUSG00000059447	Hadhb	9.01	14.99	1.66
ENSMUSG00000025207	Sema4g	9.6	15.89	1.66
ENSMUSG00000032656	March3	12.73	21.11	1.66
ENSMUSG00000034663	Bmp2k	16.04	26.68	1.66
ENSMUSG00000026380	Tfcp2l1	16.98	28.26	1.66
ENSMUSG00000032679	Cd59a	19.45	32.37	1.66
ENSMUSG00000062825	Actg1	73.21	121.35	1.66
ENSMUSG00000039238	Zfp750	88.03	145.99	1.66
ENSMUSG00000038936	Sccpdh	8.27	13.65	1.65
ENSMUSG00000023832	Acat2	9.04	14.96	1.65
ENSMUSG00000037419	Endod1	18.88	31.09	1.65
ENSMUSG00000043461	Sptssb	29.62	48.93	1.65
ENSMUSG00000039886	Tmem120a	30.43	50.21	1.65
ENSMUSG00000022176	Rem2	3.27	5.35	1.64
ENSMUSG00000057899	Gpr111	4.95	8.12	1.64
ENSMUSG00000021725	Parp8	7.82	12.84	1.64
ENSMUSG00000019737	Syne4	8.03	13.14	1.64
ENSMUSG00000029381	Shroom3	9.06	14.89	1.64
ENSMUSG00000019889	Ptprk	10.51	17.24	1.64
ENSMUSG00000060579	Fhit	15.2	25	1.64
ENSMUSG00000062753	AI413582	15.51	25.49	1.64
ENSMUSG00000032261	Sh3bgrl2	23.21	38	1.64
ENSMUSG00000003779	Kif20a	34.93	57.31	1.64
ENSMUSG00000047045	Tmem164	35.61	58.39	1.64
ENSMUSG00000030654	Arl6ip1	83.51	137.28	1.64
ENSMUSG00000090946	Ccdc71l	4.04	6.58	1.63
ENSMUSG00000009585	Apobec3	7.43	12.1	1.63
ENSMUSG00000032456	Nmnat3	12	19.6	1.63
ENSMUSG00000032109	Nlrx1	12.03	19.66	1.63
ENSMUSG00000029090	Gpr125	19.77	32.24	1.63
ENSMUSG00000028587	Orc1	21.52	35.06	1.63
ENSMUSG00000067377	Tspan6	24.97	40.66	1.63
ENSMUSG00000038894	Irs2	29.95	48.95	1.63
ENSMUSG00000029482	Aacs	32.06	52.13	1.63
ENSMUSG00000067212	H2-T23	38.28	62.51	1.63
ENSMUSG00000040811	Eml2	60.9	99.47	1.63
ENSMUSG00000058135	Gstm1	89.43	145.89	1.63
ENSMUSG00000049932	H2afx	92.59	151.34	1.63
ENSMUSG00000038650	Rnh1	222.09	361.28	1.63
ENSMUSG00000044042	Fmn1	5.15	8.35	1.62
ENSMUSG00000046318	Ccbe1	6.55	10.62	1.62
ENSMUSG00000020605	Hs1bp3	6.86	11.09	1.62
ENSMUSG00000026039	Sgol2	7.47	12.1	1.62
ENSMUSG00000026271	Gpr35	7.59	12.31	1.62
ENSMUSG00000048826	Dact2	12.4	20.06	1.62
ENSMUSG00000004451	Ralb	25.61	41.39	1.62
ENSMUSG00000042659	Arrdc4	26.53	42.91	1.62
ENSMUSG00000031910	Has3	32.16	52.24	1.62
ENSMUSG00000023367	Tmem176a	51.63	83.57	1.62
ENSMUSG00000030717	Nupr1	55.11	89.13	1.62
ENSMUSG00000001211	Agpat3	73.32	118.72	1.62
ENSMUSG00000036752	Tubb4b	132.31	214.62	1.62
ENSMUSG00000040435	Ppp1r15a	260.52	420.96	1.62
ENSMUSG00000001627	Ifrd1	327.47	529.62	1.62
ENSMUSG00000017167	Cntnap1	5.97	9.6	1.61
ENSMUSG00000089876	Tmem102	6.71	10.79	1.61
ENSMUSG00000049690	Nckap5	6.99	11.24	1.61
ENSMUSG00000029312	Klhl8	13.03	21.02	1.61
ENSMUSG00000055692	Tmem191c	18.43	29.59	1.61
ENSMUSG00000050549	5730508B09Rik	19.32	31.12	1.61
ENSMUSG00000058173	Smco4	19.82	31.9	1.61
ENSMUSG00000031371	Haus7	23.73	38.26	1.61
ENSMUSG00000040616	Tmem51	25.2	40.67	1.61
ENSMUSG00000029162	Khk	30.52	49.03	1.61
ENSMUSG00000020160	Meis1	72.2	116.16	1.61
ENSMUSG00000001420	Tmem79	104.06	167.23	1.61
ENSMUSG00000059325	Hopx	180.6	291.09	1.61
ENSMUSG00000056737	Capg	556.29	894.01	1.61
ENSMUSG00000030598	Fbxo17	3.66	5.85	1.6
ENSMUSG00000056204	Pgpep1	4.5	7.18	1.6
ENSMUSG00000058571	Gpc6	5.01	8.02	1.6
ENSMUSG00000066838	Zfp772	5.89	9.45	1.6
ENSMUSG00000054640	Slc8a1	9.95	15.94	1.6
ENSMUSG00000074272	Ceacam1	11.07	17.76	1.6
ENSMUSG00000028573	Fggy	17.04	27.25	1.6
ENSMUSG00000038286	Bphl	24.23	38.86	1.6
ENSMUSG00000059316	Slc27a4	38.88	62.25	1.6
ENSMUSG00000028793	Rnf19b	63.1	100.72	1.6
ENSMUSG00000046841	Ckap4	66.41	106.56	1.6
ENSMUSG00000029657	Hsph1	102.61	164.28	1.6
ENSMUSG00000020585	Laptm4a	294.51	471.66	1.6
ENSMUSG00000042808	Gpx2	380.51	610.49	1.6
ENSMUSG00000074579	Lekr1	3.16	5.03	1.59
ENSMUSG00000039063	Echdc3	3.2	5.09	1.59
ENSMUSG00000029918	Mrps33	6.17	9.83	1.59
ENSMUSG00000098678	Mroh6	9.09	14.43	1.59
ENSMUSG00000029851	Fam115c	10.99	17.42	1.59
ENSMUSG00000025854	Fam20c	12.6	19.98	1.59
ENSMUSG00000025545	Clybl	13.24	21.03	1.59
ENSMUSG00000031278	Acsl4	13.35	21.24	1.59
ENSMUSG00000048399	Tprg	17.79	28.3	1.59
ENSMUSG00000000708	Kat2b	20.54	32.72	1.59
ENSMUSG00000028164	Manba	23.98	38.23	1.59
ENSMUSG00000030340	Scnn1a	48.83	77.8	1.59
ENSMUSG00000023015	Racgap1	71.82	114.18	1.59
ENSMUSG00000001403	Ube2c	130.93	207.76	1.59
ENSMUSG00000026000	Lancl1	199.9	317.92	1.59
ENSMUSG00000000631	Myo18a	265.25	421.37	1.59
ENSMUSG00000035517	Tdrd7	3.26	5.16	1.58
ENSMUSG00000001131	Timp1	4.16	6.57	1.58
ENSMUSG00000059040	Eno1b	7.95	12.6	1.58
ENSMUSG00000048442	Smim5	9.65	15.26	1.58
ENSMUSG00000048497	Mmgt2	17.97	28.41	1.58
ENSMUSG00000093445	Lrch4	60.05	95.14	1.58
ENSMUSG00000040451	Sgms1	106.3	167.6	1.58
ENSMUSG00000040128	Pnrc1	126.67	200.13	1.58
ENSMUSG00000028645	Slc2a1	156.37	247.09	1.58
ENSMUSG00000022216	Psme1	174.89	277.07	1.58
ENSMUSG00000033114	Slc35d2	3.28	5.14	1.57
ENSMUSG00000036306	Lzts1	3.55	5.56	1.57
ENSMUSG00000031530	Dusp4	4.71	7.4	1.57
ENSMUSG00000032462	Pik3cb	6.47	10.13	1.57
ENSMUSG00000039911	Spsb1	7.95	12.47	1.57
ENSMUSG00000040154	Wfdc5	11.94	18.69	1.57
ENSMUSG00000011034	Slc5a1	15.12	23.67	1.57
ENSMUSG00000022965	Ifngr2	18.74	29.33	1.57
ENSMUSG00000028937	Acot7	18.74	29.37	1.57
ENSMUSG00000021286	Zfyve21	20.36	31.95	1.57
ENSMUSG00000036206	Sh3bp4	24.46	38.3	1.57
ENSMUSG00000034664	Itga2b	36.62	57.66	1.57
ENSMUSG00000027699	Ect2	39.13	61.62	1.57
ENSMUSG00000022546	Gpt	42.48	66.69	1.57
ENSMUSG00000008540	Mgst1	44.06	69.09	1.57
ENSMUSG00000039195	1110008P14Rik	46.34	72.88	1.57
ENSMUSG00000032540	Abhd5	47.02	73.97	1.57
ENSMUSG00000052419	2610001J05Rik	50.48	79.2	1.57
ENSMUSG00000002055	Spag5	57.2	89.68	1.57
ENSMUSG00000027469	Tpx2	57.23	89.81	1.57
ENSMUSG00000054091	1810037I17Rik	95.02	149.08	1.57
ENSMUSG00000025203	Scd2	109.57	172.11	1.57
ENSMUSG00000044986	Tst	133.54	210.09	1.57
ENSMUSG00000020423	Btg2	143	224.59	1.57
ENSMUSG00000030208	Emp1	577.23	905.76	1.57
ENSMUSG00000046056	Sbsn	1377.75	2161.66	1.57
ENSMUSG00000036091	Hyal3	4.13	6.45	1.56
ENSMUSG00000056268	Dennd1b	4.67	7.28	1.56
ENSMUSG00000045087	S1pr5	10.98	17.18	1.56
ENSMUSG00000046727	Cystm1	11.51	17.91	1.56
ENSMUSG00000019088	Dnase1l1	15.88	24.85	1.56
ENSMUSG00000039031	Arhgap18	17.26	26.88	1.56
ENSMUSG00000070305	Mpzl3	19.06	29.79	1.56
ENSMUSG00000029763	Exoc4	21.83	33.97	1.56
ENSMUSG00000027496	Aurka	27.83	43.38	1.56
ENSMUSG00000022856	Tmem41a	29.85	46.43	1.56
ENSMUSG00000020205	Phlda1	43.11	67.19	1.56
ENSMUSG00000030825	Hsd17b14	48.43	75.65	1.56
ENSMUSG00000032046	Abhd12	63.08	98.54	1.56
ENSMUSG00000021123	Rdh12	73.42	114.51	1.56
ENSMUSG00000031770	Herpud1	76.37	119.36	1.56
ENSMUSG00000034192	Lsm3	87.62	136.48	1.56
ENSMUSG00000033955	Tnks1bp1	245.85	384.3	1.56
ENSMUSG00000026628	Atf3	862.84	1344.94	1.56
ENSMUSG00000036598	Ccdc113	3.37	5.23	1.55
ENSMUSG00000025666	Tmem47	4.15	6.45	1.55
ENSMUSG00000050240	Hic2	5.36	8.3	1.55
ENSMUSG00000034159	2310007B03Rik	6.05	9.4	1.55
ENSMUSG00000030748	Il4ra	7.11	10.99	1.55
ENSMUSG00000041064	Pif1	8.68	13.49	1.55
ENSMUSG00000029093	Sorcs2	8.93	13.83	1.55
ENSMUSG00000028456	Unc13b	14.14	21.85	1.55
ENSMUSG00000049516	Spty2d1	19.64	30.37	1.55
ENSMUSG00000022964	Tmem50b	33.46	51.74	1.55
ENSMUSG00000043091	Tuba1c	34.2	52.85	1.55
ENSMUSG00000030659	Nucb2	36.86	57.1	1.55
ENSMUSG00000042622	Maff	41.13	63.68	1.55
ENSMUSG00000031585	Gtf2e2	88.13	136.49	1.55
ENSMUSG00000028128	F3	98.74	152.92	1.55
ENSMUSG00000069833	Ahnak	131.42	203.42	1.55
ENSMUSG00000005148	Klf5	199.53	310.14	1.55
ENSMUSG00000068036	Mllt4	213.4	330.83	1.55
ENSMUSG00000030281	Il17rc	258.27	399.36	1.55
ENSMUSG00000068205	Macrod2	6.57	10.15	1.54
ENSMUSG00000040177	2310057M21Rik	7.92	12.21	1.54
ENSMUSG00000024339	Tap2	8.44	13	1.54
ENSMUSG00000028789	Azin2	13.47	20.79	1.54
ENSMUSG00000035683	Melk	13.51	20.85	1.54
ENSMUSG00000038080	Kdm1b	14.3	21.99	1.54
ENSMUSG00000054520	Sh3bp2	21.07	32.4	1.54
ENSMUSG00000046027	Stard5	23.19	35.78	1.54
ENSMUSG00000032018	Sc5d	26.38	40.68	1.54
ENSMUSG00000028413	B4galt1	27.94	43	1.54
ENSMUSG00000010362	Rdm1	46.15	70.99	1.54
ENSMUSG00000031398	Plxna3	47.29	72.6	1.54
ENSMUSG00000031007	Atp6ap2	52.94	81.6	1.54
ENSMUSG00000019433	Gipc1	204.52	314.36	1.54
ENSMUSG00000029403	Cdkl2	7.22	11.02	1.53
ENSMUSG00000061288	Taok3	7.86	12.04	1.53
ENSMUSG00000041000	Trim62	8.05	12.29	1.53
ENSMUSG00000054400	Cklf	9.05	13.87	1.53
ENSMUSG00000036019	Tmtc2	11.24	17.25	1.53
ENSMUSG00000029352	Crybb3	13.16	20.08	1.53
ENSMUSG00000028583	Pdpn	17.12	26.22	1.53
ENSMUSG00000015133	Lrrk1	23.01	35.21	1.53
ENSMUSG00000052155	Acvr2a	33.01	50.6	1.53
ENSMUSG00000051375	Pcdh1	35.12	53.79	1.53
ENSMUSG00000049422	Chchd10	37.3	57.2	1.53
ENSMUSG00000064080	Fbln2	38.48	58.92	1.53
ENSMUSG00000021222	Dcaf4	44.73	68.53	1.53
ENSMUSG00000063524	Eno1	97.3	148.59	1.53
ENSMUSG00000037664	Cdkn1c	103.68	158.56	1.53
ENSMUSG00000044461	Shisa2	3.38	5.14	1.52
ENSMUSG00000040183	Ankrd6	3.98	6.06	1.52
ENSMUSG00000092074	Dynlt1a	4.59	6.99	1.52
ENSMUSG00000047757	Fancb	5.39	8.2	1.52
ENSMUSG00000031673	Cdh11	5.39	8.2	1.52
ENSMUSG00000035399	Oser1	6.43	9.76	1.52
ENSMUSG00000030124	Lag3	6.51	9.88	1.52
ENSMUSG00000062070	Pgk1	6.74	10.26	1.52
ENSMUSG00000060708	Bloc1s4	7.51	11.39	1.52
ENSMUSG00000039239	Tgfb2	7.57	11.53	1.52
ENSMUSG00000026113	Inpp4a	8.12	12.37	1.52
ENSMUSG00000040918	Slc19a2	11.06	16.76	1.52
ENSMUSG00000102627	Snurf	12.94	19.69	1.52
ENSMUSG00000030222	Rerg	14.52	22.08	1.52
ENSMUSG00000058260	Serpina9	14.77	22.41	1.52
ENSMUSG00000019791	Hint3	15.33	23.37	1.52
ENSMUSG00000045594	Glb1	15.38	23.38	1.52
ENSMUSG00000026622	Nek2	21.36	32.51	1.52
ENSMUSG00000027378	Nphp1	22.83	34.59	1.52
ENSMUSG00000013698	Pea15a	38.72	59.02	1.52
ENSMUSG00000024955	Esrra	49.02	74.46	1.52
ENSMUSG00000027401	Tgm3	116.58	177.06	1.52
ENSMUSG00000028860	Sytl1	166.8	253.39	1.52
ENSMUSG00000048373	Fgfbp1	212.94	324.09	1.52
ENSMUSG00000007891	Ctsd	586.41	893.83	1.52
ENSMUSG00000038141	Tmem181a	3.79	5.73	1.51
ENSMUSG00000031442	Mcf2l	5.86	8.83	1.51
ENSMUSG00000046826	Fam187b	6.21	9.37	1.51
ENSMUSG00000062515	Fabp4	6.95	10.46	1.51
ENSMUSG00000052512	Nav2	13.12	19.82	1.51
ENSMUSG00000023036	Pcdhgc4	14.1	21.24	1.51
ENSMUSG00000026430	Rassf5	15.11	22.87	1.51
ENSMUSG00000025037	Maoa	15.46	23.37	1.51
ENSMUSG00000021273	Fdft1	17.83	26.89	1.51
ENSMUSG00000042992	Loh12cr1	27.63	41.61	1.51
ENSMUSG00000032763	Ilvbl	30.44	46.11	1.51
ENSMUSG00000032602	Slc25a20	32.92	49.58	1.51
ENSMUSG00000022969	Il10rb	33.86	51.1	1.51
ENSMUSG00000070284	Gmppb	37.73	56.96	1.51
ENSMUSG00000029710	Ephb4	56.96	85.74	1.51
ENSMUSG00000027506	Tpd52	62.33	94.42	1.51
ENSMUSG00000026594	Ralgps2	68.07	102.61	1.51
ENSMUSG00000034075	Zdhhc5	87.53	132.26	1.51
ENSMUSG00000019969	Psen1	109.98	166.02	1.51
ENSMUSG00000041959	S100a10	747.63	1125.57	1.51
ENSMUSG00000022102	Dok2	3.69	5.52	1.5
ENSMUSG00000038372	Gmds	3.69	5.55	1.5
ENSMUSG00000046058	Eid2	4.71	7.06	1.5
ENSMUSG00000034854	Mfsd12	4.85	7.28	1.5
ENSMUSG00000079164	Tlr5	5.02	7.54	1.5
ENSMUSG00000025227	Tmem180	5.18	7.76	1.5
ENSMUSG00000089992	G6pd2	5.93	8.87	1.5
ENSMUSG00000028995	Fam126a	8.04	12.08	1.5
ENSMUSG00000032267	Usp28	8.42	12.65	1.5
ENSMUSG00000033209	Ttc28	8.46	12.73	1.5
ENSMUSG00000060429	Sntb1	12.27	18.46	1.5
ENSMUSG00000028914	Casp9	13.19	19.83	1.5
ENSMUSG00000038605	Samd10	13.54	20.37	1.5
ENSMUSG00000040127	Sdr9c7	15.68	23.5	1.5
ENSMUSG00000032418	Me1	21.01	31.56	1.5
ENSMUSG00000067825	Pex26	21.76	32.58	1.5
ENSMUSG00000034311	Kif4	22.83	34.29	1.5
ENSMUSG00000047557	Lxn	27.29	40.83	1.5
ENSMUSG00000020231	Dip2a	28.17	42.19	1.5
ENSMUSG00000020808	Fam64a	32.78	49.29	1.5
ENSMUSG00000063704	Mapk15	34.46	51.85	1.5
ENSMUSG00000038146	Notch3	38.05	57.04	1.5
ENSMUSG00000079197	Psme2	45.12	67.81	1.5
ENSMUSG00000026856	Dolpp1	50.12	74.94	1.5
ENSMUSG00000044037	Als2cl	51.49	77.28	1.5
ENSMUSG00000006273	Atp6v1b2	55.52	83.02	1.5
ENSMUSG00000039230	Tbcd	62.16	93.48	1.5
ENSMUSG00000071379	Hpcal1	83.8	125.4	1.5
ENSMUSG00000053898	Ech1	170.4	255.91	1.5

## Sheet: 1c GFP_Low_Enriched_Genes
Table S3: GFP_Low-Enriched Protein Coding Genes
Gene	Common_name	P0 GFP Low_mean	P0 GFP High_mean	Fold_change
ENSMUSG00000067261	Foxd3	19.01	0.12	-158.42
ENSMUSG00000026085	Lyg1	7.52	0.05	-150.4
ENSMUSG00000052229	Gpr17	17.32	0.15	-115.47
ENSMUSG00000033006	Sox10	42.73	0.51	-83.78
ENSMUSG00000027574	Nkain4	24.89	0.32	-77.78
ENSMUSG00000031385	Plxnb3	10.19	0.15	-67.93
ENSMUSG00000024366	Gfra3	18.38	0.28	-65.64
ENSMUSG00000047216	Cdh19	7.68	0.12	-64
ENSMUSG00000031354	Amelx	7.76	0.13	-59.69
ENSMUSG00000047976	Kcna1	5.52	0.11	-50.18
ENSMUSG00000030701	Plekhb1	24.27	0.52	-46.67
ENSMUSG00000025964	Adam23	26.39	0.58	-45.5
ENSMUSG00000040759	Cmtm5	9.61	0.22	-43.68
ENSMUSG00000015843	Rxrg	6.94	0.16	-43.37
ENSMUSG00000031028	Tub	8.63	0.2	-43.15
ENSMUSG00000056966	Gjc3	7.3	0.18	-40.56
ENSMUSG00000038077	Kcna6	16.05	0.4	-40.12
ENSMUSG00000025780	Itih5	35.99	0.96	-37.49
ENSMUSG00000019874	Fabp7	15.72	0.43	-36.56
ENSMUSG00000027199	Gatm	22.67	0.64	-35.42
ENSMUSG00000047564	Krtap3-1	42.07	1.23	-34.2
ENSMUSG00000020774	Aspa	5.73	0.17	-33.71
ENSMUSG00000020374	Rasgef1c	5.58	0.17	-32.82
ENSMUSG00000032268	Tmprss5	10	0.31	-32.26
ENSMUSG00000056569	Mpz	86.8	2.85	-30.46
ENSMUSG00000022122	Ednrb	19.89	0.69	-28.83
ENSMUSG00000026443	Lrrn2	5.14	0.18	-28.56
ENSMUSG00000026872	Zeb2	19.22	0.68	-28.26
ENSMUSG00000025375	Aatk	45.01	1.65	-27.28
ENSMUSG00000027966	Col11a1	18.44	0.69	-26.72
ENSMUSG00000044294	Krt84	769.41	29.11	-26.43
ENSMUSG00000000359	Rem1	7.89	0.3	-26.3
ENSMUSG00000047261	Gap43	11.11	0.43	-25.84
ENSMUSG00000037962	Fam101a	5.1	0.2	-25.5
ENSMUSG00000059974	Ntm	10.18	0.4	-25.45
ENSMUSG00000020916	Krt36	657.45	28.05	-23.44
ENSMUSG00000047641	Krt83	14.42	0.63	-22.89
ENSMUSG00000039899	Fgl2	17.75	0.79	-22.47
ENSMUSG00000045930	Clec14a	10.3	0.46	-22.39
ENSMUSG00000056350	Krtap13-1	5.78	0.27	-21.41
ENSMUSG00000068078	2310034C09Rik	5	0.25	-20
ENSMUSG00000022103	Gfra2	14.43	0.73	-19.77
ENSMUSG00000026768	Itga8	6.45	0.33	-19.55
ENSMUSG00000067613	5430421N21Rik	7.25	0.38	-19.08
ENSMUSG00000045331	2310079G19Rik	21.68	1.14	-19.02
ENSMUSG00000039385	Cdh6	5.05	0.27	-18.7
ENSMUSG00000064325	Hhip	19.98	1.09	-18.33
ENSMUSG00000020297	Nsg2	7.11	0.39	-18.23
ENSMUSG00000091619	Gm3625	18.14	0	-18
ENSMUSG00000045672	Col27a1	26.72	1.49	-17.93
ENSMUSG00000067615	Krt81	7.69	0.43	-17.88
ENSMUSG00000068794	Col28a1	7.01	0.4	-17.52
ENSMUSG00000021806	Nid2	36.11	2.1	-17.2
ENSMUSG00000021904	Sema3g	8.9	0.53	-16.79
ENSMUSG00000063297	Luzp2	5.61	0.35	-16.03
ENSMUSG00000004098	Col5a3	44.45	2.85	-15.6
ENSMUSG00000011256	Adam19	9.42	0.66	-14.27
ENSMUSG00000044139	Prss53	14.04	0.99	-14.18
ENSMUSG00000016995	Matn4	9.64	0.69	-13.97
ENSMUSG00000038156	Spon1	5.14	0.37	-13.89
ENSMUSG00000031990	Jam3	10.43	0.76	-13.72
ENSMUSG00000016356	Col20a1	112.61	8.25	-13.65
ENSMUSG00000048013	Krt35	109.01	8.34	-13.07
ENSMUSG00000020689	Itgb3	5.4	0.42	-12.86
ENSMUSG00000040428	Plekha4	55.63	4.6	-12.09
ENSMUSG00000001985	Grik3	10.69	0.9	-11.88
ENSMUSG00000090125	Pou3f1	7.99	0.7	-11.41
ENSMUSG00000015467	Egfl8	50.6	4.7	-10.77
ENSMUSG00000042453	Reln	11.88	1.11	-10.7
ENSMUSG00000063765	Chadl	7.76	0.73	-10.63
ENSMUSG00000046618	Olfml2a	30.1	2.84	-10.6
ENSMUSG00000031425	Plp1	36.61	3.47	-10.55
ENSMUSG00000041669	Prima1	8.33	0.79	-10.54
ENSMUSG00000027750	Postn	435.8	41.59	-10.48
ENSMUSG00000032625	Thsd7a	5.31	0.51	-10.41
ENSMUSG00000036570	Fxyd1	29.3	2.84	-10.32
ENSMUSG00000016024	Lbp	79.68	8.31	-9.59
ENSMUSG00000000693	Loxl3	6.15	0.66	-9.32
ENSMUSG00000025092	Hspa12a	5.77	0.63	-9.16
ENSMUSG00000009281	Rarres2	14.82	1.65	-8.98
ENSMUSG00000030428	Ttyh1	27.87	3.14	-8.88
ENSMUSG00000005338	Cadm3	5.03	0.57	-8.82
ENSMUSG00000019846	Lama4	55.59	6.32	-8.8
ENSMUSG00000005397	Nid1	49.7	5.69	-8.73
ENSMUSG00000092216	Gm19345	11.47	1.32	-8.69
ENSMUSG00000028339	Col15a1	124.36	14.48	-8.59
ENSMUSG00000021567	Nkd2	14.59	1.7	-8.58
ENSMUSG00000038463	Olfml2b	36.25	4.32	-8.39
ENSMUSG00000037736	Limch1	13.55	1.65	-8.21
ENSMUSG00000018830	Myh11	6.56	0.8	-8.2
ENSMUSG00000056870	Gulp1	10.25	1.27	-8.07
ENSMUSG00000031613	Hpgd	94.92	11.79	-8.05
ENSMUSG00000042284	Itga1	5.39	0.69	-7.81
ENSMUSG00000025584	Pde8a	10.29	1.35	-7.62
ENSMUSG00000021256	Vash1	6.4	0.85	-7.53
ENSMUSG00000050505	Pcdh20	11.54	1.54	-7.49
ENSMUSG00000027955	Fam198b	23.64	3.21	-7.36
ENSMUSG00000020913	Krt24	656.85	89.58	-7.33
ENSMUSG00000005686	Ampd3	28.18	3.91	-7.21
ENSMUSG00000001655	Hoxc13	13.83	1.93	-7.17
ENSMUSG00000053475	Tnfaip6	5.25	0.74	-7.09
ENSMUSG00000022790	Igsf11	10.98	1.56	-7.04
ENSMUSG00000098794	Gm28038	7.13	0	-7
ENSMUSG00000036560	Lgi4	15.69	2.24	-7
ENSMUSG00000056091	St3gal5	6.57	0.96	-6.84
ENSMUSG00000069722	Krtap3-3	48.08	7.13	-6.74
ENSMUSG00000026728	Vim	644.58	95.97	-6.72
ENSMUSG00000019899	Lama2	9.72	1.45	-6.7
ENSMUSG00000059146	Ntrk3	5.4	0.81	-6.67
ENSMUSG00000027570	Col9a3	11.39	1.73	-6.58
ENSMUSG00000075284	Wipf1	5.57	0.85	-6.55
ENSMUSG00000042961	Egflam	8.85	1.36	-6.51
ENSMUSG00000001802	Lrp3	18.87	2.9	-6.51
ENSMUSG00000066113	Adamtsl1	24.96	3.84	-6.5
ENSMUSG00000028476	Reck	10.6	1.64	-6.46
ENSMUSG00000035735	Dagla	7.93	1.23	-6.45
ENSMUSG00000024304	Cdh2	5.52	0.86	-6.42
ENSMUSG00000041577	Prelp	5.77	0.9	-6.41
ENSMUSG00000042258	Isl1	74.26	11.66	-6.37
ENSMUSG00000019539	Rcn3	29.49	4.75	-6.21
ENSMUSG00000029436	Mmp17	5.77	0.93	-6.2
ENSMUSG00000038602	Slc35f1	7.09	1.15	-6.17
ENSMUSG00000041828	Abca8a	24.92	4.09	-6.09
ENSMUSG00000022419	Deptor	6.14	1.01	-6.08
ENSMUSG00000002274	Metrn	32.92	5.44	-6.05
ENSMUSG00000027875	Hmgcs2	7.25	1.2	-6.04
ENSMUSG00000021838	Samd4	9.79	1.63	-6.01
ENSMUSG00000075702	Selm	1396.78	238.68	-5.85
ENSMUSG00000031486	Gpr124	10.08	1.75	-5.76
ENSMUSG00000035451	Foxa1	87.94	15.57	-5.65
ENSMUSG00000025006	Sorbs1	21.19	3.77	-5.62
ENSMUSG00000030834	Abcc6	7.97	1.45	-5.5
ENSMUSG00000038668	Lpar1	48.1	8.74	-5.5
ENSMUSG00000060512	0610040J01Rik	14.95	2.73	-5.48
ENSMUSG00000034714	Ttyh2	10.33	1.91	-5.41
ENSMUSG00000070867	Trabd2b	54.94	10.31	-5.33
ENSMUSG00000031626	Sorbs2	16.41	3.09	-5.31
ENSMUSG00000057969	Sema3b	27.57	5.19	-5.31
ENSMUSG00000055254	Ntrk2	31.06	5.85	-5.31
ENSMUSG00000038587	Akap12	9.11	1.72	-5.3
ENSMUSG00000020000	Moxd1	113.28	21.39	-5.3
ENSMUSG00000029468	P2rx7	6.19	1.18	-5.25
ENSMUSG00000019856	Fam184a	6.79	1.3	-5.22
ENSMUSG00000074971	Fibin	7	1.34	-5.22
ENSMUSG00000015745	Plekho1	36.22	6.94	-5.22
ENSMUSG00000029661	Col1a2	166.7	33.21	-5.02
ENSMUSG00000026043	Col3a1	966.16	193.26	-5
ENSMUSG00000041889	Shisa4	7.33	1.47	-4.99
ENSMUSG00000001506	Col1a1	171.83	34.41	-4.99
ENSMUSG00000021676	Iqgap2	9.36	1.9	-4.93
ENSMUSG00000041984	Rptn	27.66	5.82	-4.75
ENSMUSG00000028370	Pappa	19.86	4.21	-4.72
ENSMUSG00000031503	Col4a2	150.67	32.21	-4.68
ENSMUSG00000061353	Cxcl12	9.52	2.04	-4.67
ENSMUSG00000021091	Serpina3n	5.34	1.15	-4.64
ENSMUSG00000024063	Lbh	18.65	4.04	-4.62
ENSMUSG00000085584	Rgag1	31.02	6.74	-4.6
ENSMUSG00000067818	Myl9	136.95	29.87	-4.58
ENSMUSG00000032313	AI118078	9.58	2.1	-4.56
ENSMUSG00000027669	Gnb4	6.87	1.51	-4.55
ENSMUSG00000046782	Ttc6	7.97	1.76	-4.53
ENSMUSG00000028780	Sema3c	80.37	17.74	-4.53
ENSMUSG00000060548	Tnfrsf19	52.56	11.74	-4.48
ENSMUSG00000039621	Prex1	8.48	1.9	-4.46
ENSMUSG00000027015	Cybrd1	14.08	3.16	-4.46
ENSMUSG00000032839	Trpc1	5.02	1.15	-4.37
ENSMUSG00000027611	Procr	135.28	31.01	-4.36
ENSMUSG00000056596	Trnp1	55.35	12.73	-4.35
ENSMUSG00000025020	Slit1	101.16	23.36	-4.33
ENSMUSG00000031502	Col4a1	143.69	33.16	-4.33
ENSMUSG00000075402	Krt76	256.02	60.08	-4.26
ENSMUSG00000018217	Pmp22	91.61	21.59	-4.24
ENSMUSG00000032035	Ets1	17.89	4.26	-4.2
ENSMUSG00000038244	Mical2	59.53	14.34	-4.15
ENSMUSG00000023169	Slc38a1	6.07	1.47	-4.13
ENSMUSG00000031255	Sytl4	7.97	1.93	-4.13
ENSMUSG00000029370	Rassf6	6.17	1.5	-4.11
ENSMUSG00000023885	Thbs2	11.85	2.88	-4.11
ENSMUSG00000005360	Slc1a3	34.25	8.38	-4.09
ENSMUSG00000022799	Arhgap31	7.67	1.91	-4.02
ENSMUSG00000041482	Piezo2	6.82	1.7	-4.01
ENSMUSG00000025089	Gfra1	11.12	2.8	-3.97
ENSMUSG00000027978	Prss12	6.65	1.68	-3.96
ENSMUSG00000032060	Cryab	23.13	5.84	-3.96
ENSMUSG00000037605	Lphn3	7.39	1.87	-3.95
ENSMUSG00000030844	Rgs10	9.95	2.52	-3.95
ENSMUSG00000017724	Etv4	62.45	15.94	-3.92
ENSMUSG00000026249	Serpine2	48.16	12.35	-3.9
ENSMUSG00000040998	Npnt	131.68	34.27	-3.84
ENSMUSG00000041729	Coro2b	8.81	2.31	-3.81
ENSMUSG00000042845	Wfdc12	20.63	5.46	-3.78
ENSMUSG00000045932	Ifit2	5.86	1.56	-3.76
ENSMUSG00000029563	Foxp2	16.09	4.29	-3.75
ENSMUSG00000040260	Daam2	5.54	1.48	-3.74
ENSMUSG00000103711	Tstd1	14.83	4.01	-3.7
ENSMUSG00000042804	Gpr153	26.31	7.11	-3.7
ENSMUSG00000045312	Lhfpl2	6.38	1.73	-3.69
ENSMUSG00000021990	Spata13	12.38	3.37	-3.67
ENSMUSG00000020614	Fam20a	8.26	2.26	-3.65
ENSMUSG00000032291	Crabp1	14.28	3.95	-3.62
ENSMUSG00000032085	Tagln	23.37	6.45	-3.62
ENSMUSG00000029207	Apbb2	21.26	5.89	-3.61
ENSMUSG00000066607	6030419C18Rik	6.4	1.78	-3.6
ENSMUSG00000052415	Tchh	107.88	29.96	-3.6
ENSMUSG00000032289	Thsd4	35.52	9.95	-3.57
ENSMUSG00000048126	Col6a3	41.92	11.79	-3.56
ENSMUSG00000056427	Slit3	30.78	8.68	-3.55
ENSMUSG00000034842	Art3	37.1	10.45	-3.55
ENSMUSG00000031283	Chrdl1	22.53	6.36	-3.54
ENSMUSG00000040729	AK129341	9.97	2.83	-3.52
ENSMUSG00000000120	Ngfr	27.68	7.86	-3.52
ENSMUSG00000019929	Dcn	503.68	143.06	-3.52
ENSMUSG00000055407	Map6	10.15	2.89	-3.51
ENSMUSG00000047793	Sned1	5.74	1.64	-3.5
ENSMUSG00000035472	Slc25a21	8.55	2.46	-3.48
ENSMUSG00000066842	Hmcn1	12.93	3.72	-3.48
ENSMUSG00000079018	Ly6c1	73.38	21.11	-3.48
ENSMUSG00000045103	Dmd	16.88	4.91	-3.44
ENSMUSG00000027200	Sema6d	22.61	6.62	-3.42
ENSMUSG00000022270	Fam134b	37.83	11.11	-3.41
ENSMUSG00000015533	Itga2	16.94	4.98	-3.4
ENSMUSG00000052516	Robo2	90.35	26.6	-3.4
ENSMUSG00000034118	Tpst1	77.92	23.09	-3.37
ENSMUSG00000039775	Defb3	28.99	8.69	-3.34
ENSMUSG00000020788	Atp2a3	10.97	3.29	-3.33
ENSMUSG00000029675	Eln	76.43	22.97	-3.33
ENSMUSG00000026494	Kif26b	17	5.13	-3.31
ENSMUSG00000013921	Clip3	23.05	6.97	-3.31
ENSMUSG00000017561	Crlf3	95.78	29.02	-3.3
ENSMUSG00000037166	Ppp1r14a	11.2	3.48	-3.22
ENSMUSG00000078657	Crnn	25.9	8.08	-3.21
ENSMUSG00000054863	Fam19a5	6.66	2.08	-3.2
ENSMUSG00000026826	Nr4a2	74.48	23.38	-3.19
ENSMUSG00000016128	Stard13	14.57	4.61	-3.16
ENSMUSG00000037138	Aff3	7.44	2.37	-3.14
ENSMUSG00000020183	Cpm	99.32	31.64	-3.14
ENSMUSG00000038729	Akap2	7.58	2.42	-3.13
ENSMUSG00000041268	Dmxl2	6.57	2.11	-3.11
ENSMUSG00000044737	Klk14	28.97	9.32	-3.11
ENSMUSG00000039903	Eva1c	29.34	9.44	-3.11
ENSMUSG00000070348	Ccnd1	139.83	44.91	-3.11
ENSMUSG00000062713	Sim2	165.81	53.36	-3.11
ENSMUSG00000027800	Tm4sf1	7.71	2.49	-3.1
ENSMUSG00000047986	Palm3	6.21	2.01	-3.09
ENSMUSG00000031757	Mt4	2676.29	865.36	-3.09
ENSMUSG00000028597	Gpx7	18.07	5.86	-3.08
ENSMUSG00000039546	Ajap1	11.61	3.8	-3.06
ENSMUSG00000025934	Gsta3	32.29	10.55	-3.06
ENSMUSG00000028626	Col9a2	9.75	3.2	-3.05
ENSMUSG00000019102	Aldh3a1	42.71	14	-3.05
ENSMUSG00000017723	Wfdc2	456.68	149.86	-3.05
ENSMUSG00000030031	Kbtbd8	5.22	1.72	-3.03
ENSMUSG00000031872	Bean1	20.6	6.79	-3.03
ENSMUSG00000035783	Acta2	49.5	16.33	-3.03
ENSMUSG00000033847	Pla2g4c	9.88	3.27	-3.02
ENSMUSG00000023391	Dlx2	24.87	8.24	-3.02
ENSMUSG00000037016	Frem2	160.91	53.34	-3.02
ENSMUSG00000038456	Dennd2a	8.28	2.76	-3
ENSMUSG00000029836	Cbx3	12.52	4.17	-3
ENSMUSG00000010066	Cacna2d2	7.32	2.45	-2.99
ENSMUSG00000031760	Mt3	114.61	38.39	-2.99
ENSMUSG00000056069	Fam105a	7.23	2.43	-2.98
ENSMUSG00000032318	Isl2	41.31	13.84	-2.98
ENSMUSG00000067586	S1pr3	14.75	4.97	-2.97
ENSMUSG00000024136	Dnase1l2	23.99	8.07	-2.97
ENSMUSG00000026890	Lhx6	11.52	3.89	-2.96
ENSMUSG00000038453	Srcin1	18.41	6.28	-2.93
ENSMUSG00000053141	Ptprt	8.91	3.06	-2.91
ENSMUSG00000058624	Gda	11.5	3.95	-2.91
ENSMUSG00000002900	Lamb1	90.31	31.01	-2.91
ENSMUSG00000032118	Fez1	5.85	2.02	-2.9
ENSMUSG00000012017	Scarf2	6.59	2.31	-2.85
ENSMUSG00000009687	Fxyd5	11.54	4.07	-2.84
ENSMUSG00000056515	Rab31	12.02	4.25	-2.83
ENSMUSG00000044485	Klk1b11	8.89	3.19	-2.79
ENSMUSG00000021846	Peli2	23.77	8.55	-2.78
ENSMUSG00000042116	Vwa1	23.86	8.58	-2.78
ENSMUSG00000032076	Cadm1	33.72	12.19	-2.77
ENSMUSG00000043439	E130012A19Rik	12.03	4.36	-2.76
ENSMUSG00000039438	Ttc36	6.5	2.37	-2.74
ENSMUSG00000044320	1700001O22Rik	11.91	4.35	-2.74
ENSMUSG00000044026	Slc35g1	33.87	12.35	-2.74
ENSMUSG00000067001	Serpinb7	5.09	1.87	-2.72
ENSMUSG00000003273	Car11	14.25	5.23	-2.72
ENSMUSG00000029309	Sparcl1	22.39	8.25	-2.71
ENSMUSG00000036782	Klhl13	8.6	3.19	-2.7
ENSMUSG00000007682	Dio2	16.61	6.15	-2.7
ENSMUSG00000052632	Asap2	37.27	13.79	-2.7
ENSMUSG00000040415	Dtx3	346.1	128.28	-2.7
ENSMUSG00000051323	Pcdh19	11.83	4.39	-2.69
ENSMUSG00000039518	Cdsn	6.31	2.36	-2.67
ENSMUSG00000022324	Matn2	85.12	31.86	-2.67
ENSMUSG00000068220	Lgals1	152.66	57.24	-2.67
ENSMUSG00000027692	Tnik	11	4.14	-2.66
ENSMUSG00000035095	Fam167a	127.72	48.09	-2.66
ENSMUSG00000033149	Phldb2	24.18	9.14	-2.65
ENSMUSG00000025083	Afap1l2	74.43	28.04	-2.65
ENSMUSG00000033033	Calhm2	11.73	4.45	-2.64
ENSMUSG00000032363	Adamts7	6.84	2.61	-2.62
ENSMUSG00000028655	Mfsd2a	52.41	20.06	-2.61
ENSMUSG00000023911	Flywch2	189.43	72.58	-2.61
ENSMUSG00000021469	Msx2	8.69	3.36	-2.59
ENSMUSG00000022439	Parvg	5.6	2.17	-2.58
ENSMUSG00000055435	Maf	14.58	5.65	-2.58
ENSMUSG00000041734	Kirrel	17.59	6.81	-2.58
ENSMUSG00000039236	Isg20	45.95	17.83	-2.58
ENSMUSG00000029802	Abcg2	5.51	2.15	-2.56
ENSMUSG00000035258	Abi3bp	11.56	4.51	-2.56
ENSMUSG00000071847	Apcdd1	327.52	127.91	-2.56
ENSMUSG00000027173	Depdc7	20.76	8.14	-2.55
ENSMUSG00000033985	Tesk2	8.68	3.42	-2.54
ENSMUSG00000048332	Lhfp	23.64	9.31	-2.54
ENSMUSG00000023191	Leprel2	36.52	14.39	-2.54
ENSMUSG00000027217	Tspan18	9.74	3.85	-2.53
ENSMUSG00000042225	Ammecr1	41.03	16.24	-2.53
ENSMUSG00000040297	Suco	83.8	33.12	-2.53
ENSMUSG00000023915	Tnfrsf21	25.46	10.09	-2.52
ENSMUSG00000027947	Il6ra	59.41	23.62	-2.52
ENSMUSG00000057614	Gnai1	59.44	23.63	-2.52
ENSMUSG00000041313	Slc7a1	82.92	32.93	-2.52
ENSMUSG00000049721	Gal3st1	8.55	3.4	-2.51
ENSMUSG00000039831	Arhgap29	85.19	33.92	-2.51
ENSMUSG00000006782	Cnp	24.81	9.94	-2.5
ENSMUSG00000047767	Atg16l2	25.84	10.32	-2.5
ENSMUSG00000022661	Cd200	30.23	12.17	-2.48
ENSMUSG00000026640	Plxna2	117.06	47.19	-2.48
ENSMUSG00000041607	Mbp	55.28	22.36	-2.47
ENSMUSG00000026837	Col5a1	90.43	36.59	-2.47
ENSMUSG00000024534	Sncaip	10.86	4.41	-2.46
ENSMUSG00000022229	Atp12a	16.84	6.85	-2.46
ENSMUSG00000035969	Rusc2	17.44	7.1	-2.46
ENSMUSG00000015222	Map2	41.9	17.03	-2.46
ENSMUSG00000033327	Tnxb	5.82	2.38	-2.45
ENSMUSG00000044005	Gls2	8.62	3.52	-2.45
ENSMUSG00000055538	Zcchc24	11.73	4.81	-2.44
ENSMUSG00000029166	Mapre3	48.2	19.74	-2.44
ENSMUSG00000046329	Slc25a23	5.25	2.16	-2.43
ENSMUSG00000020256	Aldh1l2	11.77	4.85	-2.43
ENSMUSG00000059430	Actg2	8.75	3.61	-2.42
ENSMUSG00000066621	Tecpr1	78.65	32.55	-2.42
ENSMUSG00000099908	Gm28539	5.25	2.18	-2.41
ENSMUSG00000030306	Tmtc1	15.28	6.34	-2.41
ENSMUSG00000068196	Col8a1	52.01	21.58	-2.41
ENSMUSG00000044674	Fzd1	63.9	26.54	-2.41
ENSMUSG00000046750	BC089491	160.32	66.61	-2.41
ENSMUSG00000030638	Sh3gl3	6.12	2.55	-2.4
ENSMUSG00000020473	Aebp1	6.2	2.58	-2.4
ENSMUSG00000049971	Glt1d1	7.8	3.25	-2.4
ENSMUSG00000041298	Katnal1	20.77	8.66	-2.4
ENSMUSG00000017002	Slpi	65.21	27.21	-2.4
ENSMUSG00000028033	Kcnq5	7.1	2.97	-2.39
ENSMUSG00000042477	Tfap2e	20.68	8.66	-2.39
ENSMUSG00000030020	Prickle2	25.37	10.62	-2.39
ENSMUSG00000031561	Tenm3	54.52	22.85	-2.39
ENSMUSG00000033022	Cdo1	195.46	81.84	-2.39
ENSMUSG00000037685	Atp8a1	13.58	5.71	-2.38
ENSMUSG00000030091	Nup210	6.31	2.66	-2.37
ENSMUSG00000035407	Kank4	8.69	3.67	-2.37
ENSMUSG00000000782	Tcf7	9.72	4.12	-2.36
ENSMUSG00000022885	St6gal1	10.62	4.5	-2.36
ENSMUSG00000039985	Fam60a	7.04	3	-2.35
ENSMUSG00000000486	Sept1	9.11	3.87	-2.35
ENSMUSG00000029311	Hsd17b11	6.29	2.69	-2.34
ENSMUSG00000063455	D630045J12Rik	26.05	11.13	-2.34
ENSMUSG00000028358	Zfp618	90.31	38.59	-2.34
ENSMUSG00000039611	Tmem246	58.82	25.24	-2.33
ENSMUSG00000032714	Syde1	7.71	3.32	-2.32
ENSMUSG00000024044	Epb4.1l3	57.87	24.97	-2.32
ENSMUSG00000040010	Slc7a5	152.3	65.75	-2.32
ENSMUSG00000024533	Spire1	6.5	2.81	-2.31
ENSMUSG00000020740	Gga3	131.72	56.99	-2.31
ENSMUSG00000002985	Apoe	177.33	76.76	-2.31
ENSMUSG00000031860	Pbx4	8.74	3.8	-2.3
ENSMUSG00000028121	Bcar3	53.25	23.19	-2.3
ENSMUSG00000075602	Ly6a	306.48	133.06	-2.3
ENSMUSG00000026489	Adck3	31.93	13.96	-2.29
ENSMUSG00000018672	Copz2	15.31	6.72	-2.28
ENSMUSG00000099269	Calm5	15.39	6.76	-2.28
ENSMUSG00000024654	Asrgl1	13.85	6.11	-2.27
ENSMUSG00000030323	Ift122	28.27	12.46	-2.27
ENSMUSG00000038607	Gng10	89.21	39.29	-2.27
ENSMUSG00000046314	Stxbp6	7.03	3.11	-2.26
ENSMUSG00000044667	Lppr4	8.15	3.61	-2.26
ENSMUSG00000009248	Ascl2	11.63	5.14	-2.26
ENSMUSG00000028194	Ddah1	23.66	10.46	-2.26
ENSMUSG00000031342	Gpm6b	24.19	10.72	-2.26
ENSMUSG00000028532	Cachd1	138.96	61.38	-2.26
ENSMUSG00000046876	Atxn1	8.3	3.69	-2.25
ENSMUSG00000060002	Chpt1	18.17	8.07	-2.25
ENSMUSG00000037071	Scd1	7.88	3.52	-2.24
ENSMUSG00000025104	Hdgfrp3	14.92	6.67	-2.24
ENSMUSG00000026042	Col5a2	65.03	29.08	-2.24
ENSMUSG00000033763	Mtss1l	79.41	35.43	-2.24
ENSMUSG00000042331	Specc1	10.77	4.84	-2.23
ENSMUSG00000089989	Flt3l	34.11	15.32	-2.23
ENSMUSG00000040722	Scamp5	6.73	3.03	-2.22
ENSMUSG00000037455	Slc18b1	25.99	11.72	-2.22
ENSMUSG00000035513	Ntng2	16.07	7.27	-2.21
ENSMUSG00000048807	Slc35e4	17.95	8.11	-2.21
ENSMUSG00000037679	Inf2	32.58	14.77	-2.21
ENSMUSG00000063903	Klk1	65.97	29.87	-2.21
ENSMUSG00000070371	Prss36	79.39	36	-2.21
ENSMUSG00000025082	Vwa2	129.66	58.67	-2.21
ENSMUSG00000025314	Ptprj	5.19	2.36	-2.2
ENSMUSG00000004267	Eno2	6.15	2.8	-2.2
ENSMUSG00000025810	Nrp1	6.57	2.99	-2.2
ENSMUSG00000029070	Mxra8	32.31	14.67	-2.2
ENSMUSG00000021614	Vcan	72.88	33.16	-2.2
ENSMUSG00000026825	Dnm1	5.67	2.59	-2.19
ENSMUSG00000049336	Tenm2	33.52	15.34	-2.19
ENSMUSG00000014158	Trpv4	56.88	25.99	-2.19
ENSMUSG00000073643	Wdfy1	10.23	4.69	-2.18
ENSMUSG00000039270	Megf9	53.93	24.73	-2.18
ENSMUSG00000073421	H2-Ab1	67.41	30.93	-2.18
ENSMUSG00000022548	Apod	8.37	3.86	-2.17
ENSMUSG00000004631	Sgce	13.28	6.12	-2.17
ENSMUSG00000020865	Abcc3	22.48	10.34	-2.17
ENSMUSG00000050910	Cdr2l	5.15	2.39	-2.15
ENSMUSG00000042532	Golga7b	5.86	2.73	-2.15
ENSMUSG00000015850	Adamtsl4	14.66	6.82	-2.15
ENSMUSG00000039959	Hip1	9.89	4.63	-2.14
ENSMUSG00000015305	Sash1	17.08	7.98	-2.14
ENSMUSG00000022479	Vdr	51.3	24	-2.14
ENSMUSG00000033721	Vav3	106.41	49.78	-2.14
ENSMUSG00000025511	Tspan4	9.66	4.54	-2.13
ENSMUSG00000049521	Cdc42ep1	28.9	13.55	-2.13
ENSMUSG00000032334	Loxl1	5.68	2.68	-2.12
ENSMUSG00000035357	Pdzrn3	9.52	4.5	-2.12
ENSMUSG00000095115	Itpripl2	12.39	5.84	-2.12
ENSMUSG00000032038	St3gal4	13.37	6.31	-2.12
ENSMUSG00000029718	Pcolce	26.06	12.37	-2.11
ENSMUSG00000039405	Prss23	37.4	17.71	-2.11
ENSMUSG00000034771	Tle2	54.84	25.98	-2.11
ENSMUSG00000030409	Dmpk	239.72	113.37	-2.11
ENSMUSG00000001497	Pax9	253.83	120.17	-2.11
ENSMUSG00000078937	Cpt1b	6.58	3.14	-2.1
ENSMUSG00000000305	Cdh4	12.68	6.07	-2.09
ENSMUSG00000049699	Ucn2	55.44	26.47	-2.09
ENSMUSG00000001911	Nfix	143.39	68.45	-2.09
ENSMUSG00000003420	Fcgrt	14.03	6.76	-2.08
ENSMUSG00000021388	Aspn	15.95	7.68	-2.08
ENSMUSG00000023912	Slc25a27	27.42	13.21	-2.08
ENSMUSG00000059412	Fxyd2	5.16	2.49	-2.07
ENSMUSG00000028931	Kcnab2	5.77	2.79	-2.07
ENSMUSG00000047766	Lrrc49	35.78	17.3	-2.07
ENSMUSG00000028619	Tceanc2	45.44	21.95	-2.07
ENSMUSG00000067276	Capn6	59.5	28.77	-2.07
ENSMUSG00000038816	Ctnnal1	61.65	29.81	-2.07
ENSMUSG00000041351	Rap1gap	15.79	7.66	-2.06
ENSMUSG00000017314	Mpp2	21.58	10.46	-2.06
ENSMUSG00000037712	Fermt2	22.38	10.87	-2.06
ENSMUSG00000020099	Unc5b	40.21	19.56	-2.06
ENSMUSG00000022096	Hr	511.34	248.56	-2.06
ENSMUSG00000018593	Sparc	897.23	438.33	-2.05
ENSMUSG00000029408	Abcb9	23.54	11.52	-2.04
ENSMUSG00000001020	S100a4	62.07	30.47	-2.04
ENSMUSG00000025433	Crisp3	5.12	2.52	-2.03
ENSMUSG00000049404	Rarres1	5.99	2.95	-2.03
ENSMUSG00000026475	Rgs16	6.69	3.29	-2.03
ENSMUSG00000003378	Grik5	8.76	4.33	-2.02
ENSMUSG00000014980	Tsen15	9.93	4.92	-2.02
ENSMUSG00000029053	Prkcz	11.7	5.8	-2.02
ENSMUSG00000071226	Cecr2	5.26	2.62	-2.01
ENSMUSG00000013701	Timm23	11.24	5.58	-2.01
ENSMUSG00000057766	Ankrd29	21.63	10.74	-2.01
ENSMUSG00000078919	Dpm1	49.84	24.8	-2.01
ENSMUSG00000048455	Sprr1b	166.9	83.02	-2.01
ENSMUSG00000063506	Arhgap22	26.83	13.44	-2
ENSMUSG00000063060	Sox7	6.05	3.04	-1.99
ENSMUSG00000021125	Arg2	12.25	6.16	-1.99
ENSMUSG00000056459	Zbtb25	12.28	6.16	-1.99
ENSMUSG00000000753	Serpinf1	19.68	9.89	-1.99
ENSMUSG00000021959	Lats2	21.5	10.78	-1.99
ENSMUSG00000036111	Lmo1	34.63	17.43	-1.99
ENSMUSG00000080316	Spaca6	123.07	61.9	-1.99
ENSMUSG00000044447	Dock5	6.66	3.36	-1.98
ENSMUSG00000033446	Lpar6	17.9	9.04	-1.98
ENSMUSG00000020866	Cacna1g	40.55	20.53	-1.98
ENSMUSG00000054793	Cadm4	73.55	37.19	-1.98
ENSMUSG00000002808	Epdr1	6.02	3.06	-1.97
ENSMUSG00000037306	Man1c1	12.15	6.17	-1.97
ENSMUSG00000027351	Spred1	40.52	20.52	-1.97
ENSMUSG00000026814	Eng	9.07	4.62	-1.96
ENSMUSG00000030116	Mfap5	11.31	5.76	-1.96
ENSMUSG00000041688	Amot	22.2	11.32	-1.96
ENSMUSG00000029755	Dlx5	24.9	12.69	-1.96
ENSMUSG00000052852	Reep1	5.31	2.72	-1.95
ENSMUSG00000026437	Cdk18	36.83	18.85	-1.95
ENSMUSG00000039994	Timeless	46.21	23.71	-1.95
ENSMUSG00000032594	Ip6k1	233.15	119.35	-1.95
ENSMUSG00000002732	Fkbp7	17.6	9.05	-1.94
ENSMUSG00000015224	Cyp2j9	13.3	6.9	-1.93
ENSMUSG00000026574	Dpt	16.36	8.49	-1.93
ENSMUSG00000010064	Slc38a3	24.24	12.56	-1.93
ENSMUSG00000102308	RP24-157G15.1	41.6	21.57	-1.93
ENSMUSG00000018604	Tbx3	63.05	32.67	-1.93
ENSMUSG00000047730	Fcgbp	5.69	2.96	-1.92
ENSMUSG00000043067	Dpy19l1	14.47	7.54	-1.92
ENSMUSG00000055320	Tead1	24.31	12.69	-1.92
ENSMUSG00000032744	Heyl	10.58	5.54	-1.91
ENSMUSG00000039929	Urb1	14.44	7.55	-1.91
ENSMUSG00000035104	Eva1a	5.69	2.99	-1.9
ENSMUSG00000032221	Mns1	8.13	4.27	-1.9
ENSMUSG00000047583	Tyw3	9.81	5.16	-1.9
ENSMUSG00000038242	Aox4	13.29	6.98	-1.9
ENSMUSG00000024669	Cd5	40.48	21.36	-1.9
ENSMUSG00000020044	Timp3	62.89	33.08	-1.9
ENSMUSG00000042404	Dennd4b	5.89	3.11	-1.89
ENSMUSG00000097487	Ptges3l	16.69	8.84	-1.89
ENSMUSG00000047881	Rell1	85.26	45.15	-1.89
ENSMUSG00000062995	Ica1	5.86	3.11	-1.88
ENSMUSG00000095315	Gm10130	5.9	3.14	-1.88
ENSMUSG00000022094	Slc39a14	10.72	5.71	-1.88
ENSMUSG00000039747	Orai2	15.66	8.34	-1.88
ENSMUSG00000057666	Gapdh	20.04	10.66	-1.88
ENSMUSG00000055128	Cgrrf1	23.2	12.31	-1.88
ENSMUSG00000000125	Wnt3	24.75	13.19	-1.88
ENSMUSG00000018339	Gpx3	91.45	48.72	-1.88
ENSMUSG00000022844	Pdia5	6.03	3.22	-1.87
ENSMUSG00000024987	Cyp26a1	6.49	3.47	-1.87
ENSMUSG00000018405	Mrm1	15.56	8.32	-1.87
ENSMUSG00000027340	Slc23a2	17.74	9.49	-1.87
ENSMUSG00000025795	Rassf3	25.6	13.69	-1.87
ENSMUSG00000004105	Angptl2	33.95	18.11	-1.87
ENSMUSG00000073771	Btbd19	35.37	18.88	-1.87
ENSMUSG00000059230	Defb4	114.55	61.12	-1.87
ENSMUSG00000031312	Itgb1bp2	5.96	3.2	-1.86
ENSMUSG00000009739	Pou6f1	7.8	4.2	-1.86
ENSMUSG00000008307	1700109H08Rik	14.24	7.67	-1.86
ENSMUSG00000020566	Atp6v1c2	16.72	8.97	-1.86
ENSMUSG00000039153	Runx2	24.23	13.04	-1.86
ENSMUSG00000020899	Pfas	29.02	15.59	-1.86
ENSMUSG00000021953	Tdh	38.44	20.68	-1.86
ENSMUSG00000042063	Zfp386	38.45	20.64	-1.86
ENSMUSG00000046079	Lrrc8d	44.06	23.67	-1.86
ENSMUSG00000032135	Mcam	96.55	51.91	-1.86
ENSMUSG00000040690	Col16a1	169.05	90.79	-1.86
ENSMUSG00000025723	Nmb	5.81	3.14	-1.85
ENSMUSG00000049396	Gemin4	13.16	7.11	-1.85
ENSMUSG00000017929	B4galt5	13.65	7.36	-1.85
ENSMUSG00000003518	Dusp3	16.45	8.89	-1.85
ENSMUSG00000031904	Slc7a6	27.17	14.7	-1.85
ENSMUSG00000028165	Cisd2	30.24	16.36	-1.85
ENSMUSG00000029108	Pcdh7	38.24	20.66	-1.85
ENSMUSG00000031273	Col4a6	42.94	23.23	-1.85
ENSMUSG00000040591	1110051M20Rik	50	27.08	-1.85
ENSMUSG00000020176	Grb10	53.4	28.86	-1.85
ENSMUSG00000071454	Dtnb	171.29	92.71	-1.85
ENSMUSG00000025743	Sdc3	176.81	95.43	-1.85
ENSMUSG00000021950	Anxa8	1203.42	650.4	-1.85
ENSMUSG00000036943	Rab8b	9.07	4.93	-1.84
ENSMUSG00000090626	Tex9	15.19	8.26	-1.84
ENSMUSG00000027985	Lef1	31.53	17.18	-1.84
ENSMUSG00000062098	Btbd3	34.54	18.75	-1.84
ENSMUSG00000061259	Tmprss11d	57.86	31.48	-1.84
ENSMUSG00000029528	Pxn	154.95	84.01	-1.84
ENSMUSG00000073413	Ly6g6d	5.28	2.88	-1.83
ENSMUSG00000030022	Adamts9	6.09	3.32	-1.83
ENSMUSG00000032014	Oaf	6.66	3.63	-1.83
ENSMUSG00000029392	Rilpl1	8.28	4.53	-1.83
ENSMUSG00000048616	Nog	16.09	8.78	-1.83
ENSMUSG00000028763	Hspg2	104.77	57.15	-1.83
ENSMUSG00000025159	Mms19	119.08	64.99	-1.83
ENSMUSG00000057092	Fxyd3	3209.46	1752.34	-1.83
ENSMUSG00000046668	Cxxc5	10.04	5.53	-1.82
ENSMUSG00000027175	Tcp11l1	14.38	7.88	-1.82
ENSMUSG00000026749	Nek6	16.04	8.83	-1.82
ENSMUSG00000051950	B3glct	17.64	9.71	-1.82
ENSMUSG00000006800	Sulf2	18.45	10.14	-1.82
ENSMUSG00000058006	Mdn1	22.19	12.17	-1.82
ENSMUSG00000046434	Hnrnpa1	24.64	13.51	-1.82
ENSMUSG00000060216	Arrb2	29.28	16.05	-1.82
ENSMUSG00000029359	Tesc	31.15	17.09	-1.82
ENSMUSG00000022864	D16Ertd472e	72.52	39.89	-1.82
ENSMUSG00000028465	Tln1	137.09	75.17	-1.82
ENSMUSG00000022793	B4galt4	6.12	3.39	-1.81
ENSMUSG00000032766	Gng11	6.41	3.55	-1.81
ENSMUSG00000044339	Alkbh2	11.19	6.18	-1.81
ENSMUSG00000027010	Slc25a12	106.26	58.8	-1.81
ENSMUSG00000020262	Adarb1	113.19	62.54	-1.81
ENSMUSG00000055053	Nfic	121.76	67.25	-1.81
ENSMUSG00000075704	Txnrd2	205.16	113.58	-1.81
ENSMUSG00000026478	Lamc1	225.86	124.57	-1.81
ENSMUSG00000026479	Lamc2	792.08	436.89	-1.81
ENSMUSG00000056900	Usp13	7.17	3.98	-1.8
ENSMUSG00000026409	Pfkfb2	62.42	34.75	-1.8
ENSMUSG00000021458	2010111I01Rik	132.48	73.59	-1.8
ENSMUSG00000024268	Celf4	6.03	3.37	-1.79
ENSMUSG00000055629	B4galnt4	6.71	3.75	-1.79
ENSMUSG00000004655	Aqp1	9.43	5.28	-1.79
ENSMUSG00000073792	Alg6	9.71	5.42	-1.79
ENSMUSG00000023755	Rhebl1	11.77	6.59	-1.79
ENSMUSG00000038351	Sgsm2	31.67	17.71	-1.79
ENSMUSG00000019978	Epb4.1l2	44.7	25.04	-1.79
ENSMUSG00000026335	Pam	106.26	59.45	-1.79
ENSMUSG00000037935	Smarce1	110.14	61.58	-1.79
ENSMUSG00000033685	Ucp2	1658.36	925.8	-1.79
ENSMUSG00000062044	Lmtk3	5.17	2.91	-1.78
ENSMUSG00000040990	Sh3kbp1	6.68	3.75	-1.78
ENSMUSG00000029641	Rasl11a	7.48	4.21	-1.78
ENSMUSG00000045095	Magi1	14.99	8.44	-1.78
ENSMUSG00000015085	Entpd2	42.24	23.69	-1.78
ENSMUSG00000000093	Tbx2	42.81	24.08	-1.78
ENSMUSG00000045160	Bola3	59.72	33.57	-1.78
ENSMUSG00000038375	Trp53inp2	94.1	52.91	-1.78
ENSMUSG00000041120	Nbl1	118.35	66.56	-1.78
ENSMUSG00000036158	Prickle1	6.75	3.81	-1.77
ENSMUSG00000017639	Rab11fip4	24.37	13.73	-1.77
ENSMUSG00000028468	Rgp1	72.49	41.04	-1.77
ENSMUSG00000047428	Dlk2	96.11	54.42	-1.77
ENSMUSG00000031565	Fgfr1	152.07	85.86	-1.77
ENSMUSG00000021756	Il6st	297.66	168.64	-1.77
ENSMUSG00000000811	Txnrd3	7399.91	4191.38	-1.77
ENSMUSG00000038860	Garnl3	5.29	3	-1.76
ENSMUSG00000010751	Tnfrsf22	5.85	3.33	-1.76
ENSMUSG00000053198	Prx	9.16	5.21	-1.76
ENSMUSG00000031555	Adam9	37.16	21.06	-1.76
ENSMUSG00000060572	Mfap2	46.94	26.72	-1.76
ENSMUSG00000018554	Ybx2	68.53	38.93	-1.76
ENSMUSG00000054196	Cthrc1	9.12	5.2	-1.75
ENSMUSG00000037032	Apbb1	12.19	6.97	-1.75
ENSMUSG00000034863	Ano8	14.87	8.48	-1.75
ENSMUSG00000076435	Acsf2	16.18	9.22	-1.75
ENSMUSG00000066643	Wdr35	18.2	10.39	-1.75
ENSMUSG00000040234	Tm7sf3	30.32	17.32	-1.75
ENSMUSG00000018417	Myo1b	9.87	5.68	-1.74
ENSMUSG00000061175	Fnip2	17.08	9.83	-1.74
ENSMUSG00000000142	Axin2	17.67	10.16	-1.74
ENSMUSG00000037020	Wdr62	37.54	21.54	-1.74
ENSMUSG00000037242	Clic4	83.06	47.65	-1.74
ENSMUSG00000045817	Zfp36l2	114.46	65.84	-1.74
ENSMUSG00000035967	Ddx26b	123.79	70.94	-1.74
ENSMUSG00000029761	Cald1	284.71	163.6	-1.74
ENSMUSG00000039096	Rsad1	5.11	2.96	-1.73
ENSMUSG00000030123	Plxnd1	5.93	3.42	-1.73
ENSMUSG00000034910	Pygo1	7.7	4.45	-1.73
ENSMUSG00000044921	Rassf9	13	7.52	-1.73
ENSMUSG00000040943	Tet2	18.69	10.81	-1.73
ENSMUSG00000001270	Ckb	36.5	21.15	-1.73
ENSMUSG00000022656	Pvrl3	7.22	4.19	-1.72
ENSMUSG00000024598	Fbn2	11.08	6.45	-1.72
ENSMUSG00000060188	Cxcl17	13.67	7.97	-1.72
ENSMUSG00000075254	Heg1	14.91	8.66	-1.72
ENSMUSG00000037325	Bbs7	16.98	9.9	-1.72
ENSMUSG00000044367	Slc16a13	42.81	24.86	-1.72
ENSMUSG00000024665	Fads2	53.39	31.05	-1.72
ENSMUSG00000033863	Klf9	59.48	34.68	-1.72
ENSMUSG00000036169	Sostdc1	91.29	52.96	-1.72
ENSMUSG00000059851	Suv420h2	154.35	89.57	-1.72
ENSMUSG00000032892	Rangrf	9.31	5.45	-1.71
ENSMUSG00000028949	Smarcd3	17.61	10.32	-1.71
ENSMUSG00000027999	Pla2g12a	33.93	19.86	-1.71
ENSMUSG00000033965	Slc16a2	34.03	19.9	-1.71
ENSMUSG00000028104	Polr3gl	50.17	29.36	-1.71
ENSMUSG00000009633	G0s2	6.21	3.66	-1.7
ENSMUSG00000020131	Pcsk4	8.32	4.89	-1.7
ENSMUSG00000014039	Prdm15	23.31	13.74	-1.7
ENSMUSG00000040712	Camta2	25.77	15.14	-1.7
ENSMUSG00000006763	Saal1	28.15	16.59	-1.7
ENSMUSG00000016477	E2f3	29.71	17.51	-1.7
ENSMUSG00000068015	Lrch1	34.89	20.47	-1.7
ENSMUSG00000025213	Kazald1	46.92	27.6	-1.7
ENSMUSG00000027253	Lrp4	72.21	42.6	-1.7
ENSMUSG00000052534	Pbx1	113.02	66.41	-1.7
ENSMUSG00000022995	Enah	236.89	139.31	-1.7
ENSMUSG00000029163	Emilin1	5.95	3.53	-1.69
ENSMUSG00000032374	Plod2	15.29	9.03	-1.69
ENSMUSG00000024132	Eci1	20.9	12.37	-1.69
ENSMUSG00000024909	Efemp2	37.19	22.04	-1.69
ENSMUSG00000074259	Gramd2	42.96	25.41	-1.69
ENSMUSG00000025986	Slc39a10	71.07	41.96	-1.69
ENSMUSG00000002799	Jag2	178.03	105.37	-1.69
ENSMUSG00000028124	Gclm	188.84	111.97	-1.69
ENSMUSG00000020427	Igfbp3	188.94	111.68	-1.69
ENSMUSG00000072494	Ppp1r3e	6.8	4.04	-1.68
ENSMUSG00000062012	Zfp13	7.13	4.25	-1.68
ENSMUSG00000040852	Plekhh2	7.78	4.63	-1.68
ENSMUSG00000025350	Rdh5	11.99	7.13	-1.68
ENSMUSG00000048915	Efna5	25.22	15.04	-1.68
ENSMUSG00000009828	Ick	37.18	22.17	-1.68
ENSMUSG00000022596	Slurp1	38.63	23.06	-1.68
ENSMUSG00000043557	Mdga1	6.11	3.65	-1.67
ENSMUSG00000025507	Pidd1	10.76	6.45	-1.67
ENSMUSG00000017778	Cox7c	30.28	18.09	-1.67
ENSMUSG00000038400	Pmepa1	38.82	23.31	-1.67
ENSMUSG00000037643	Prkci	302.82	181.55	-1.67
ENSMUSG00000035798	Zdhhc17	6.74	4.06	-1.66
ENSMUSG00000045038	Prkce	8.59	5.16	-1.66
ENSMUSG00000030465	Psd3	10.34	6.22	-1.66
ENSMUSG00000041773	Enc1	11.96	7.19	-1.66
ENSMUSG00000030259	Rassf8	14.94	9.02	-1.66
ENSMUSG00000002012	Pnck	18.26	10.97	-1.66
ENSMUSG00000048644	Ctxn1	21.24	12.76	-1.66
ENSMUSG00000027272	Ubr1	29.77	17.98	-1.66
ENSMUSG00000024140	Epas1	35.67	21.49	-1.66
ENSMUSG00000047250	Ptgs1	43.09	25.94	-1.66
ENSMUSG00000051550	Zfp579	55.69	33.51	-1.66
ENSMUSG00000034361	Cpne2	60.19	36.23	-1.66
ENSMUSG00000031808	Slc27a1	64.14	38.53	-1.66
ENSMUSG00000033287	Kctd17	189.14	113.96	-1.66
ENSMUSG00000040488	Ltbp4	803.29	482.52	-1.66
ENSMUSG00000053821	Gm9922	5.25	3.18	-1.65
ENSMUSG00000045917	6330416G13Rik	9.35	5.66	-1.65
ENSMUSG00000024781	Lipa	9.45	5.73	-1.65
ENSMUSG00000031951	Tmem231	11.16	6.76	-1.65
ENSMUSG00000037490	Slc2a12	12.34	7.5	-1.65
ENSMUSG00000034674	Tdg	12.85	7.8	-1.65
ENSMUSG00000020319	Wdpcp	13.57	8.24	-1.65
ENSMUSG00000059895	Ptp4a3	14.66	8.87	-1.65
ENSMUSG00000022020	Naa16	15.62	9.45	-1.65
ENSMUSG00000052105	Mtcl1	19.01	11.53	-1.65
ENSMUSG00000032184	Lysmd2	32.72	19.81	-1.65
ENSMUSG00000021411	Pxdc1	54.05	32.67	-1.65
ENSMUSG00000026883	Dab2ip	97.1	58.98	-1.65
ENSMUSG00000039168	Dap	193.74	117.44	-1.65
ENSMUSG00000024376	Epb4.1l4a	19.04	11.62	-1.64
ENSMUSG00000034205	Loxl2	21.93	13.38	-1.64
ENSMUSG00000025366	Esyt1	23.8	14.52	-1.64
ENSMUSG00000027510	Rbm38	27.98	17.06	-1.64
ENSMUSG00000038593	Tctn1	29.27	17.81	-1.64
ENSMUSG00000039081	Zfp503	30.86	18.85	-1.64
ENSMUSG00000038217	Tlcd2	40.92	24.88	-1.64
ENSMUSG00000010663	Fads1	41.34	25.27	-1.64
ENSMUSG00000020812	1810032O08Rik	47.88	29.25	-1.64
ENSMUSG00000045639	Zfp629	54.56	33.34	-1.64
ENSMUSG00000017765	Slc12a4	146.88	89.53	-1.64
ENSMUSG00000001435	Col18a1	382.21	232.6	-1.64
ENSMUSG00000006356	Crip2	476.59	289.78	-1.64
ENSMUSG00000050640	Tmem150c	5.73	3.52	-1.63
ENSMUSG00000052062	Pard3b	5.82	3.56	-1.63
ENSMUSG00000028710	Atpaf1	7.32	4.5	-1.63
ENSMUSG00000057337	Chst3	10.66	6.53	-1.63
ENSMUSG00000027677	Ttc14	12.65	7.74	-1.63
ENSMUSG00000020871	Dlx4	16.48	10.13	-1.63
ENSMUSG00000020961	Ston2	29.9	18.33	-1.63
ENSMUSG00000038520	Tbc1d17	75.47	46.19	-1.63
ENSMUSG00000036446	Lum	6	3.7	-1.62
ENSMUSG00000071708	Sms	9	5.57	-1.62
ENSMUSG00000019467	Arhgef25	14.38	8.87	-1.62
ENSMUSG00000025534	Gusb	15.67	9.67	-1.62
ENSMUSG00000073889	Il11ra1	22.58	13.96	-1.62
ENSMUSG00000031024	St5	22.65	14.02	-1.62
ENSMUSG00000047414	Flrt2	27.91	17.23	-1.62
ENSMUSG00000002486	Tchp	32.39	20.01	-1.62
ENSMUSG00000041075	Fzd7	39.39	24.34	-1.62
ENSMUSG00000029122	Evc	39.58	24.4	-1.62
ENSMUSG00000022754	Tmem45a	58.5	36.02	-1.62
ENSMUSG00000071537	Klrg2	66.38	40.94	-1.62
ENSMUSG00000013033	Lphn1	86.35	53.35	-1.62
ENSMUSG00000004085	Zak	108.72	67.07	-1.62
ENSMUSG00000031841	Cdh13	108.74	66.96	-1.62
ENSMUSG00000048537	Phldb1	125.5	77.61	-1.62
ENSMUSG00000044221	Grsf1	133.6	82.7	-1.62
ENSMUSG00000024736	Tmem132a	390.11	241.07	-1.62
ENSMUSG00000025650	Col7a1	578.11	355.96	-1.62
ENSMUSG00000023050	Map3k12	9.23	5.75	-1.61
ENSMUSG00000010830	Kdelr3	11.2	6.97	-1.61
ENSMUSG00000027615	Hps3	12.26	7.63	-1.61
ENSMUSG00000016494	Cd34	13.78	8.58	-1.61
ENSMUSG00000037493	Cib2	25.2	15.7	-1.61
ENSMUSG00000074749	Kiz	25.82	16.07	-1.61
ENSMUSG00000051855	Mest	26.21	16.24	-1.61
ENSMUSG00000040928	S100pbp	33.79	20.99	-1.61
ENSMUSG00000021365	Nedd9	35.78	22.28	-1.61
ENSMUSG00000062078	Qk	70.44	43.68	-1.61
ENSMUSG00000029471	Camkk2	6.92	4.32	-1.6
ENSMUSG00000026435	Slc45a3	7.28	4.55	-1.6
ENSMUSG00000040111	Gramd1b	8.04	5.02	-1.6
ENSMUSG00000042500	Ago4	9.16	5.73	-1.6
ENSMUSG00000046753	Ccdc66	10.8	6.77	-1.6
ENSMUSG00000032235	Ice2	12.07	7.54	-1.6
ENSMUSG00000046351	Zfp322a	12.87	8.05	-1.6
ENSMUSG00000013089	Etv5	17.83	11.16	-1.6
ENSMUSG00000024462	Gabbr1	57.51	35.99	-1.6
ENSMUSG00000042303	Sgsm3	67.07	41.97	-1.6
ENSMUSG00000031246	Sh3bgrl	74.26	46.51	-1.6
ENSMUSG00000030770	Parva	104.08	64.94	-1.6
ENSMUSG00000028344	Invs	5.05	3.17	-1.59
ENSMUSG00000038074	Fkbp14	5.53	3.47	-1.59
ENSMUSG00000048981	Krt31	7.3	4.58	-1.59
ENSMUSG00000027994	Ccdc109b	10.83	6.82	-1.59
ENSMUSG00000051817	Sox12	14.38	9.03	-1.59
ENSMUSG00000034064	Poglut1	31.44	19.78	-1.59
ENSMUSG00000029469	Ift81	33.66	21.13	-1.59
ENSMUSG00000059824	Dbp	36.32	22.79	-1.59
ENSMUSG00000001510	Dlx3	50.63	31.87	-1.59
ENSMUSG00000022386	Trmu	67	42.16	-1.59
ENSMUSG00000029570	Lfng	75.3	47.22	-1.59
ENSMUSG00000027185	Nat10	90.77	56.94	-1.59
ENSMUSG00000020439	Smtn	105.75	66.43	-1.59
ENSMUSG00000032251	Irak1bp1	5.42	3.44	-1.58
ENSMUSG00000095362	Gm14325	8.21	5.21	-1.58
ENSMUSG00000019647	Sema6a	8.35	5.27	-1.58
ENSMUSG00000038059	Smim3	13.01	8.24	-1.58
ENSMUSG00000026135	Zfp142	13.61	8.6	-1.58
ENSMUSG00000040167	Ikzf5	13.87	8.79	-1.58
ENSMUSG00000071350	Setdb2	14.69	9.32	-1.58
ENSMUSG00000043391	2510009E07Rik	18.08	11.45	-1.58
ENSMUSG00000040187	Arntl2	18.3	11.61	-1.58
ENSMUSG00000059540	Tcea2	18.51	11.73	-1.58
ENSMUSG00000029674	Limk1	20.75	13.13	-1.58
ENSMUSG00000049044	Rapgef4	28.8	18.2	-1.58
ENSMUSG00000029029	Wrap73	31.32	19.79	-1.58
ENSMUSG00000040097	Flywch1	32.96	20.89	-1.58
ENSMUSG00000038150	Ormdl3	79.23	50.25	-1.58
ENSMUSG00000029860	Zyx	225.37	142.29	-1.58
ENSMUSG00000050989	Sepn1	3134.71	1985.03	-1.58
ENSMUSG00000044676	Zfp612	5.89	3.74	-1.57
ENSMUSG00000090840	1700092M07Rik	5.98	3.81	-1.57
ENSMUSG00000042066	Tmcc2	6.06	3.87	-1.57
ENSMUSG00000055980	Irs1	7.15	4.55	-1.57
ENSMUSG00000037007	Zfp113	8.14	5.2	-1.57
ENSMUSG00000047238	Mageh1	10.86	6.9	-1.57
ENSMUSG00000027935	Rab13	16.28	10.37	-1.57
ENSMUSG00000042436	Mfap4	16.57	10.55	-1.57
ENSMUSG00000028134	Ptbp2	22.86	14.57	-1.57
ENSMUSG00000020744	Slc25a19	27.91	17.81	-1.57
ENSMUSG00000036555	Iqce	28.78	18.29	-1.57
ENSMUSG00000030527	Crtc3	29.89	19	-1.57
ENSMUSG00000002028	Kmt2a	31.25	19.94	-1.57
ENSMUSG00000040631	Dok4	34.01	21.7	-1.57
ENSMUSG00000037989	Wnk2	48.11	30.62	-1.57
ENSMUSG00000026259	Ngef	73.58	46.85	-1.57
ENSMUSG00000030583	Sipa1l3	97.39	61.99	-1.57
ENSMUSG00000034163	Zfc3h1	101.24	64.68	-1.57
ENSMUSG00000020644	Id2	107.36	68.31	-1.57
ENSMUSG00000034255	Arhgap27	109.19	69.34	-1.57
ENSMUSG00000040434	Gyltl1b	133.52	84.81	-1.57
ENSMUSG00000020758	Itgb4	664.08	424.3	-1.57
ENSMUSG00000063652	Slc22a21	7	4.48	-1.56
ENSMUSG00000026482	Rgl1	11.09	7.09	-1.56
ENSMUSG00000015452	Ager	11.11	7.13	-1.56
ENSMUSG00000049300	Prmt6	12.17	7.79	-1.56
ENSMUSG00000008398	Elk3	16.08	10.3	-1.56
ENSMUSG00000039347	Atp6v0e2	17.1	10.95	-1.56
ENSMUSG00000024943	Smc5	19.7	12.62	-1.56
ENSMUSG00000023938	Aars2	22.82	14.61	-1.56
ENSMUSG00000044322	Dsc1	28.99	18.63	-1.56
ENSMUSG00000034175	Rhbdd3	33.71	21.56	-1.56
ENSMUSG00000032340	Neo1	43.87	28.12	-1.56
ENSMUSG00000038256	Bcl9	48.98	31.47	-1.56
ENSMUSG00000002105	Slc39a13	62.51	40.16	-1.56
ENSMUSG00000025215	Tlx1	79.47	50.9	-1.56
ENSMUSG00000021792	Fam213a	99.93	64.21	-1.56
ENSMUSG00000023022	Lima1	100.82	64.44	-1.56
ENSMUSG00000042675	Ypel3	194.76	125.07	-1.56
ENSMUSG00000038174	Fam126b	5.09	3.28	-1.55
ENSMUSG00000036908	Unc93b1	6.67	4.31	-1.55
ENSMUSG00000031523	Dlc1	7.37	4.74	-1.55
ENSMUSG00000031617	Tmem184c	19.47	12.6	-1.55
ENSMUSG00000062997	Rpl35	20.6	13.29	-1.55
ENSMUSG00000004994	Ccdc130	24.23	15.67	-1.55
ENSMUSG00000019997	Ctgf	25.6	16.49	-1.55
ENSMUSG00000038886	Man2a2	29.74	19.16	-1.55
ENSMUSG00000027901	Dennd2d	37.99	24.52	-1.55
ENSMUSG00000024002	Brd4	93.82	60.44	-1.55
ENSMUSG00000031229	Atrx	95.32	61.48	-1.55
ENSMUSG00000027763	Mbnl1	151.36	97.85	-1.55
ENSMUSG00000017607	Tns4	223.86	144.02	-1.55
ENSMUSG00000025453	Nnt	7.8	5.07	-1.54
ENSMUSG00000047022	Mipol1	9.41	6.13	-1.54
ENSMUSG00000045374	Wdr81	10.95	7.12	-1.54
ENSMUSG00000029126	Nsg1	10.96	7.1	-1.54
ENSMUSG00000039542	Ncam1	11.79	7.64	-1.54
ENSMUSG00000021702	Thbs4	17.42	11.28	-1.54
ENSMUSG00000069678	Pcgf1	23.27	15.1	-1.54
ENSMUSG00000031608	Galnt7	24.41	15.81	-1.54
ENSMUSG00000025722	Wdr73	28.6	18.6	-1.54
ENSMUSG00000053398	Phgdh	32.93	21.41	-1.54
ENSMUSG00000028402	Mpdz	44.21	28.66	-1.54
ENSMUSG00000026193	Fn1	46.56	30.16	-1.54
ENSMUSG00000021495	Fam193b	49.33	31.98	-1.54
ENSMUSG00000017734	Dbndd2	49.65	32.31	-1.54
ENSMUSG00000026670	Uap1	76.75	49.86	-1.54
ENSMUSG00000020706	Ftsj3	110.84	71.88	-1.54
ENSMUSG00000028854	Slc9a1	113.65	73.94	-1.54
ENSMUSG00000039323	Igfbp2	3118.17	2022.35	-1.54
ENSMUSG00000074653	Lrrc31	5.05	3.29	-1.53
ENSMUSG00000020546	Stxbp4	5.28	3.46	-1.53
ENSMUSG00000021217	Tshz3	7.08	4.62	-1.53
ENSMUSG00000011267	Zfp296	8.43	5.52	-1.53
ENSMUSG00000020019	Ntn4	8.68	5.67	-1.53
ENSMUSG00000046798	Cldn12	22.51	14.67	-1.53
ENSMUSG00000022912	Pros1	22.67	14.78	-1.53
ENSMUSG00000044340	Phlpp1	22.73	14.81	-1.53
ENSMUSG00000036916	Zfp280c	25.56	16.73	-1.53
ENSMUSG00000021067	Sav1	29.21	19.03	-1.53
ENSMUSG00000026771	Spopl	30.87	20.15	-1.53
ENSMUSG00000058486	Wdr91	36	23.6	-1.53
ENSMUSG00000050860	Phospho1	39.47	25.75	-1.53
ENSMUSG00000038679	Trps1	39.77	25.95	-1.53
ENSMUSG00000032579	Hemk1	42.48	27.85	-1.53
ENSMUSG00000008575	Nfib	47.22	30.84	-1.53
ENSMUSG00000079523	Tmsb10	51.51	33.7	-1.53
ENSMUSG00000030672	Mylpf	73.14	47.67	-1.53
ENSMUSG00000038976	Ppp1r9b	84.96	55.71	-1.53
ENSMUSG00000018537	Pcgf2	125.67	82.18	-1.53
ENSMUSG00000001870	Ltbp1	151.22	98.92	-1.53
ENSMUSG00000030122	Ptms	1345.92	881.6	-1.53
ENSMUSG00000028348	Murc	6.4	4.2	-1.52
ENSMUSG00000045268	Zfp691	7.66	5.04	-1.52
ENSMUSG00000019831	Wasf1	7.74	5.08	-1.52
ENSMUSG00000061983	Rps12	8.03	5.3	-1.52
ENSMUSG00000058546	Rpl23a	8.92	5.85	-1.52
ENSMUSG00000032558	Nphp3	10.71	7.05	-1.52
ENSMUSG00000037287	Tbcel	11.4	7.51	-1.52
ENSMUSG00000054934	Kcnmb4	12.3	8.08	-1.52
ENSMUSG00000033540	Idua	12.63	8.29	-1.52
ENSMUSG00000069581	Tspear	16.17	10.62	-1.52
ENSMUSG00000029094	Afap1	31.33	20.62	-1.52
ENSMUSG00000022105	Rb1	38.54	25.39	-1.52
ENSMUSG00000023942	Slc29a1	44.82	29.57	-1.52
ENSMUSG00000025377	Enthd2	49.91	32.94	-1.52
ENSMUSG00000057541	Pus7	50.31	33.18	-1.52
ENSMUSG00000041921	Metap1d	65.88	43.41	-1.52
ENSMUSG00000052040	Klf13	76.57	50.21	-1.52
ENSMUSG00000002602	Axl	94.59	62.26	-1.52
ENSMUSG00000022185	Acin1	306.94	202.5	-1.52
ENSMUSG00000047193	Dync2h1	5.72	3.78	-1.51
ENSMUSG00000025912	Mybl1	6.57	4.36	-1.51
ENSMUSG00000066829	Zfp810	8.27	5.49	-1.51
ENSMUSG00000022802	Lmln	8.55	5.66	-1.51
ENSMUSG00000026274	Pask	10.29	6.8	-1.51
ENSMUSG00000054737	Zfp182	10.66	7.07	-1.51
ENSMUSG00000028687	Mutyh	11.94	7.93	-1.51
ENSMUSG00000046719	Nxph3	12.81	8.46	-1.51
ENSMUSG00000062590	Armc9	16.5	10.93	-1.51
ENSMUSG00000027495	Fam210b	24.51	16.22	-1.51
ENSMUSG00000026200	Glb1l	28.15	18.66	-1.51
ENSMUSG00000021054	Sgpp1	29.95	19.88	-1.51
ENSMUSG00000079104	Prps1l3	32.6	21.57	-1.51
ENSMUSG00000034687	Fras1	33.92	22.42	-1.51
ENSMUSG00000073758	Sh3d21	34.79	22.97	-1.51
ENSMUSG00000026698	Pigc	36.22	24.03	-1.51
ENSMUSG00000046671	Mtfr1l	46.55	30.8	-1.51
ENSMUSG00000035173	Ccdc186	48	31.73	-1.51
ENSMUSG00000024597	Slc12a2	55.09	36.37	-1.51
ENSMUSG00000022914	Brwd1	60.96	40.44	-1.51
ENSMUSG00000022999	Lmbr1l	63.19	41.75	-1.51
ENSMUSG00000036948	BC037034	63.74	42.18	-1.51
ENSMUSG00000029869	Ephb6	107.39	71.03	-1.51
ENSMUSG00000057530	Ece1	775.52	513.98	-1.51
ENSMUSG00000026600	Soat1	6.46	4.31	-1.5
ENSMUSG00000025010	Ccnj	6.82	4.54	-1.5
ENSMUSG00000034126	Pomt2	7.3	4.86	-1.5
ENSMUSG00000033852	Gm28042	9.52	6.36	-1.5
ENSMUSG00000041625	Ggact	12.59	8.41	-1.5
ENSMUSG00000028648	Ndufs5	15.13	10.08	-1.5
ENSMUSG00000049811	Fam161a	15.7	10.46	-1.5
ENSMUSG00000020716	Nf1	16.31	10.86	-1.5
ENSMUSG00000026791	Slc2a8	16.47	10.95	-1.5
ENSMUSG00000035125	Gcfc2	17.45	11.66	-1.5
ENSMUSG00000001323	Srr	18.89	12.57	-1.5
ENSMUSG00000063146	Clip2	21.75	14.47	-1.5
ENSMUSG00000027777	Schip1	22.05	14.71	-1.5
ENSMUSG00000072115	Ang	25.83	17.19	-1.5
ENSMUSG00000040212	Emp3	26.45	17.61	-1.5
ENSMUSG00000059486	Kbtbd2	30.7	20.48	-1.5
ENSMUSG00000001918	Slc1a5	39.41	26.2	-1.5
ENSMUSG00000001687	Ubl3	40.87	27.24	-1.5
ENSMUSG00000009035	Tmem184b	50.15	33.36	-1.5
ENSMUSG00000010453	Kansl3	54.93	36.59	-1.5
ENSMUSG00000027889	Ampd2	59.92	39.84	-1.5
ENSMUSG00000039637	Coro7	70.72	47.26	-1.5
ENSMUSG00000022272	Myo10	75.66	50.54	-1.5
ENSMUSG00000033257	Ttll4	80.2	53.54	-1.5
ENSMUSG00000004100	Ppan	132.21	87.93	-1.5
ENSMUSG00000053931	Cnn3	139.06	93.01	-1.5
ENSMUSG00000033420	Antxr1	176.55	117.81	-1.5
ENSMUSG00000038418	Egr1	1971.56	1314.06	-1.5

## Sheet: 1d GFP_High_GO_Terms
1d: SOX2-GFP_High GO Terms (biological processes)
source	term_name	term_id	adjusted_p_value	negative_log10_of_adjusted_p_value	term_size	query_size	intersection_size	effective_domain_size	intersections
GO:BP	lipid metabolic process	GO:0006629	2.96694e-14	13.5277	1174	905	119	20346	ENSMUSG00000002633	ENSMUSG00000010175	ENSMUSG00000026170	ENSMUSG00000024526	ENSMUSG00000004885	ENSMUSG00000031844	ENSMUSG00000029727	ENSMUSG00000053279	ENSMUSG00000023913	ENSMUSG00000022040	ENSMUSG00000046402	ENSMUSG00000058022	ENSMUSG00000027761	ENSMUSG00000039092	ENSMUSG00000032454	ENSMUSG00000070644	ENSMUSG00000043430	ENSMUSG00000026981	ENSMUSG00000030303	ENSMUSG00000074207	ENSMUSG00000029154	ENSMUSG00000028749	ENSMUSG00000033520	ENSMUSG00000022383	ENSMUSG00000075593	ENSMUSG00000000320	ENSMUSG00000021148	ENSMUSG00000059456	ENSMUSG00000028893	ENSMUSG00000028607	ENSMUSG00000029134	ENSMUSG00000037025	ENSMUSG00000028341	ENSMUSG00000046971	ENSMUSG00000030747	ENSMUSG00000027533	ENSMUSG00000040875	ENSMUSG00000053846	ENSMUSG00000032238	ENSMUSG00000020405	ENSMUSG00000030790
GO:BP	small molecule metabolic process	GO:0044281	7.16376e-14	13.1449	1583	1018	157	20346	ENSMUSG00000033427	ENSMUSG00000029695	ENSMUSG00000010175	ENSMUSG00000026170	ENSMUSG00000030268	ENSMUSG00000004885	ENSMUSG00000053279	ENSMUSG00000022040	ENSMUSG00000046402	ENSMUSG00000058022	ENSMUSG00000021456	ENSMUSG00000046794	ENSMUSG00000020407	ENSMUSG00000033308	ENSMUSG00000030303	ENSMUSG00000023960	ENSMUSG00000074207	ENSMUSG00000033520	ENSMUSG00000042684	ENSMUSG00000022383	ENSMUSG00000042249	ENSMUSG00000021338	ENSMUSG00000036273	ENSMUSG00000027639	ENSMUSG00000000320	ENSMUSG00000021148	ENSMUSG00000059456	ENSMUSG00000028893	ENSMUSG00000028607	ENSMUSG00000029134	ENSMUSG00000037025	ENSMUSG00000028341	ENSMUSG00000046971	ENSMUSG00000030747	ENSMUSG00000037577	ENSMUSG00000027533	ENSMUSG00000026185	ENSMUSG00000034744	ENSMUSG00000032238	ENSMUSG00000020405	ENSMUSG00000062908
GO:BP	alcohol metabolic process	GO:0006066	1.81592e-10	9.7409	286	750	41	20346	ENSMUSG00000026170	ENSMUSG00000053279	ENSMUSG00000022040	ENSMUSG00000046402	ENSMUSG00000074207	ENSMUSG00000033520	ENSMUSG00000042249	ENSMUSG00000021148	ENSMUSG00000059456	ENSMUSG00000029134	ENSMUSG00000030747	ENSMUSG00000075296	ENSMUSG00000058454	ENSMUSG00000045294	ENSMUSG00000041939	ENSMUSG00000025059	ENSMUSG00000032193	ENSMUSG00000010660	ENSMUSG00000027227	ENSMUSG00000031483	ENSMUSG00000026317	ENSMUSG00000022351	ENSMUSG00000037940	ENSMUSG00000056666	ENSMUSG00000003752	ENSMUSG00000059743	ENSMUSG00000025950	ENSMUSG00000042289	ENSMUSG00000034926	ENSMUSG00000003271	ENSMUSG00000055301	ENSMUSG00000024525	ENSMUSG00000028236	ENSMUSG00000027952	ENSMUSG00000025198	ENSMUSG00000041440	ENSMUSG00000001467	ENSMUSG00000006517	ENSMUSG00000049313	ENSMUSG00000028048	ENSMUSG00000024747
GO:BP	organic hydroxy compound metabolic process	GO:1901615	2.45774e-10	9.60946	440	750	52	20346	ENSMUSG00000010175	ENSMUSG00000026170	ENSMUSG00000053279	ENSMUSG00000022040	ENSMUSG00000046402	ENSMUSG00000070990	ENSMUSG00000074207	ENSMUSG00000033520	ENSMUSG00000042249	ENSMUSG00000000320	ENSMUSG00000021148	ENSMUSG00000059456	ENSMUSG00000029134	ENSMUSG00000030747	ENSMUSG00000020405	ENSMUSG00000075296	ENSMUSG00000024378	ENSMUSG00000030792	ENSMUSG00000058454	ENSMUSG00000045294	ENSMUSG00000041939	ENSMUSG00000039007	ENSMUSG00000025059	ENSMUSG00000032193	ENSMUSG00000010660	ENSMUSG00000027227	ENSMUSG00000031483	ENSMUSG00000026317	ENSMUSG00000022351	ENSMUSG00000037940	ENSMUSG00000001249	ENSMUSG00000056666	ENSMUSG00000039529	ENSMUSG00000031604	ENSMUSG00000003752	ENSMUSG00000059743	ENSMUSG00000025950	ENSMUSG00000042289	ENSMUSG00000034926	ENSMUSG00000003271	ENSMUSG00000055301
GO:BP	cellular lipid metabolic process	GO:0044255	5.97024e-10	9.22401	865	905	88	20346	ENSMUSG00000004885	ENSMUSG00000029727	ENSMUSG00000053279	ENSMUSG00000023913	ENSMUSG00000022040	ENSMUSG00000046402	ENSMUSG00000058022	ENSMUSG00000027761	ENSMUSG00000039092	ENSMUSG00000032454	ENSMUSG00000070644	ENSMUSG00000043430	ENSMUSG00000074207	ENSMUSG00000029154	ENSMUSG00000028749	ENSMUSG00000033520	ENSMUSG00000022383	ENSMUSG00000075593	ENSMUSG00000000320	ENSMUSG00000021148	ENSMUSG00000059456	ENSMUSG00000028893	ENSMUSG00000028607	ENSMUSG00000029134	ENSMUSG00000028341	ENSMUSG00000046971	ENSMUSG00000030747	ENSMUSG00000027533	ENSMUSG00000062908	ENSMUSG00000032715	ENSMUSG00000028894	ENSMUSG00000047443	ENSMUSG00000024378	ENSMUSG00000045294	ENSMUSG00000041939	ENSMUSG00000036880	ENSMUSG00000025059	ENSMUSG00000032193	ENSMUSG00000018796	ENSMUSG00000031483	ENSMUSG00000026317
GO:BP	tissue development	GO:0009888	1.31781e-08	7.88015	1802	979	151	20346	ENSMUSG00000002633	ENSMUSG00000055027	ENSMUSG00000025491	ENSMUSG00000010175	ENSMUSG00000028681	ENSMUSG00000029671	ENSMUSG00000020140	ENSMUSG00000017491	ENSMUSG00000059668	ENSMUSG00000049107	ENSMUSG00000027186	ENSMUSG00000053279	ENSMUSG00000045539	ENSMUSG00000028289	ENSMUSG00000016918	ENSMUSG00000070990	ENSMUSG00000051367	ENSMUSG00000025407	ENSMUSG00000047143	ENSMUSG00000029335	ENSMUSG00000022330	ENSMUSG00000038112	ENSMUSG00000029378	ENSMUSG00000048138	ENSMUSG00000050295	ENSMUSG00000022512	ENSMUSG00000022383	ENSMUSG00000037362	ENSMUSG00000030873	ENSMUSG00000003051	ENSMUSG00000021466	ENSMUSG00000026879	ENSMUSG00000045871	ENSMUSG00000022018	ENSMUSG00000054612	ENSMUSG00000000320	ENSMUSG00000022469	ENSMUSG00000059456	ENSMUSG00000061517	ENSMUSG00000050359	ENSMUSG00000000216
GO:BP	steroid metabolic process	GO:0008202	1.82676e-08	7.73832	263	743	36	20346	ENSMUSG00000002633	ENSMUSG00000010175	ENSMUSG00000026170	ENSMUSG00000031844	ENSMUSG00000029727	ENSMUSG00000022040	ENSMUSG00000033520	ENSMUSG00000021148	ENSMUSG00000037025	ENSMUSG00000030747	ENSMUSG00000032238	ENSMUSG00000020405	ENSMUSG00000030790	ENSMUSG00000003555	ENSMUSG00000024378	ENSMUSG00000030792	ENSMUSG00000058454	ENSMUSG00000045294	ENSMUSG00000041939	ENSMUSG00000034308	ENSMUSG00000032193	ENSMUSG00000031483	ENSMUSG00000026317	ENSMUSG00000022351	ENSMUSG00000039529	ENSMUSG00000031604	ENSMUSG00000059743	ENSMUSG00000042289	ENSMUSG00000034926	ENSMUSG00000003271	ENSMUSG00000027952	ENSMUSG00000025198	ENSMUSG00000001467	ENSMUSG00000006517	ENSMUSG00000049313	ENSMUSG00000028048
GO:BP	small molecule biosynthetic process	GO:0044283	2.00651e-08	7.69756	555	885	62	20346	ENSMUSG00000033427	ENSMUSG00000010175	ENSMUSG00000026170	ENSMUSG00000030268	ENSMUSG00000004885	ENSMUSG00000053279	ENSMUSG00000046402	ENSMUSG00000021456	ENSMUSG00000020407	ENSMUSG00000033308	ENSMUSG00000023960	ENSMUSG00000033520	ENSMUSG00000022383	ENSMUSG00000027639	ENSMUSG00000000320	ENSMUSG00000021148	ENSMUSG00000059456	ENSMUSG00000028893	ENSMUSG00000046971	ENSMUSG00000030747	ENSMUSG00000027533	ENSMUSG00000062908	ENSMUSG00000032715	ENSMUSG00000024378	ENSMUSG00000030792	ENSMUSG00000058454	ENSMUSG00000026473	ENSMUSG00000045294	ENSMUSG00000041939	ENSMUSG00000021457	ENSMUSG00000010660	ENSMUSG00000027227	ENSMUSG00000031483	ENSMUSG00000003752	ENSMUSG00000059743	ENSMUSG00000034926	ENSMUSG00000033174	ENSMUSG00000039942	ENSMUSG00000024525	ENSMUSG00000027605	ENSMUSG00000036775
GO:BP	epithelium development	GO:0060429	3.8507e-08	7.41446	1081	979	103	20346	ENSMUSG00000002633	ENSMUSG00000025491	ENSMUSG00000010175	ENSMUSG00000028681	ENSMUSG00000029671	ENSMUSG00000020140	ENSMUSG00000017491	ENSMUSG00000059668	ENSMUSG00000027186	ENSMUSG00000053279	ENSMUSG00000045539	ENSMUSG00000028289	ENSMUSG00000016918	ENSMUSG00000070990	ENSMUSG00000051367	ENSMUSG00000025407	ENSMUSG00000029378	ENSMUSG00000048138	ENSMUSG00000050295	ENSMUSG00000022512	ENSMUSG00000030873	ENSMUSG00000003051	ENSMUSG00000021466	ENSMUSG00000045871	ENSMUSG00000054612	ENSMUSG00000000320	ENSMUSG00000022469	ENSMUSG00000061517	ENSMUSG00000050359	ENSMUSG00000000216	ENSMUSG00000025993	ENSMUSG00000037025	ENSMUSG00000026185	ENSMUSG00000022218	ENSMUSG00000048482	ENSMUSG00000005355	ENSMUSG00000030790	ENSMUSG00000063651	ENSMUSG00000049436	ENSMUSG00000042207	ENSMUSG00000022996
GO:BP	system development	GO:0048731	4.85278e-08	7.31401	4449	968	298	20346	ENSMUSG00000033427	ENSMUSG00000030307	ENSMUSG00000002633	ENSMUSG00000055027	ENSMUSG00000010175	ENSMUSG00000036466	ENSMUSG00000035158	ENSMUSG00000022986	ENSMUSG00000025876	ENSMUSG00000028681	ENSMUSG00000004885	ENSMUSG00000029671	ENSMUSG00000020140	ENSMUSG00000024109	ENSMUSG00000039683	ENSMUSG00000021508	ENSMUSG00000025582	ENSMUSG00000031844	ENSMUSG00000017491	ENSMUSG00000049107	ENSMUSG00000027186	ENSMUSG00000040605	ENSMUSG00000053279	ENSMUSG00000046402	ENSMUSG00000058022	ENSMUSG00000045539	ENSMUSG00000027500	ENSMUSG00000023886	ENSMUSG00000043924	ENSMUSG00000028289	ENSMUSG00000016918	ENSMUSG00000070990	ENSMUSG00000050957	ENSMUSG00000051367	ENSMUSG00000035305	ENSMUSG00000028386	ENSMUSG00000070644	ENSMUSG00000025407	ENSMUSG00000047143	ENSMUSG00000029335	ENSMUSG00000022330
GO:BP	sterol metabolic process	GO:0016125	8.56634e-08	7.0672	118	743	23	20346	ENSMUSG00000026170	ENSMUSG00000022040	ENSMUSG00000033520	ENSMUSG00000021148	ENSMUSG00000030747	ENSMUSG00000058454	ENSMUSG00000045294	ENSMUSG00000041939	ENSMUSG00000032193	ENSMUSG00000031483	ENSMUSG00000026317	ENSMUSG00000022351	ENSMUSG00000031604	ENSMUSG00000059743	ENSMUSG00000042289	ENSMUSG00000034926	ENSMUSG00000003271	ENSMUSG00000027952	ENSMUSG00000025198	ENSMUSG00000001467	ENSMUSG00000006517	ENSMUSG00000049313	ENSMUSG00000028048
GO:BP	monocarboxylic acid metabolic process	GO:0032787	1.32835e-07	6.87669	509	986	61	20346	ENSMUSG00000010175	ENSMUSG00000004885	ENSMUSG00000053279	ENSMUSG00000022040	ENSMUSG00000046402	ENSMUSG00000058022	ENSMUSG00000074207	ENSMUSG00000022383	ENSMUSG00000000320	ENSMUSG00000028893	ENSMUSG00000028607	ENSMUSG00000028341	ENSMUSG00000046971	ENSMUSG00000030747	ENSMUSG00000027533	ENSMUSG00000020405	ENSMUSG00000062908	ENSMUSG00000032715	ENSMUSG00000047443	ENSMUSG00000024378	ENSMUSG00000045294	ENSMUSG00000036880	ENSMUSG00000025059	ENSMUSG00000018796	ENSMUSG00000031483	ENSMUSG00000039529	ENSMUSG00000027710	ENSMUSG00000017390	ENSMUSG00000021947	ENSMUSG00000025950	ENSMUSG00000039206	ENSMUSG00000033174	ENSMUSG00000032281	ENSMUSG00000055301	ENSMUSG00000027605	ENSMUSG00000027984	ENSMUSG00000072949	ENSMUSG00000036775	ENSMUSG00000024659	ENSMUSG00000025198	ENSMUSG00000021226
GO:BP	secondary alcohol metabolic process	GO:1902652	1.46264e-07	6.83486	121	743	23	20346	ENSMUSG00000026170	ENSMUSG00000022040	ENSMUSG00000033520	ENSMUSG00000021148	ENSMUSG00000030747	ENSMUSG00000058454	ENSMUSG00000045294	ENSMUSG00000041939	ENSMUSG00000032193	ENSMUSG00000031483	ENSMUSG00000026317	ENSMUSG00000022351	ENSMUSG00000059743	ENSMUSG00000025950	ENSMUSG00000042289	ENSMUSG00000034926	ENSMUSG00000003271	ENSMUSG00000027952	ENSMUSG00000025198	ENSMUSG00000001467	ENSMUSG00000006517	ENSMUSG00000049313	ENSMUSG00000028048
GO:BP	cholesterol metabolic process	GO:0008203	1.93882e-07	6.71246	112	743	22	20346	ENSMUSG00000026170	ENSMUSG00000022040	ENSMUSG00000033520	ENSMUSG00000021148	ENSMUSG00000030747	ENSMUSG00000058454	ENSMUSG00000045294	ENSMUSG00000041939	ENSMUSG00000032193	ENSMUSG00000031483	ENSMUSG00000026317	ENSMUSG00000022351	ENSMUSG00000059743	ENSMUSG00000042289	ENSMUSG00000034926	ENSMUSG00000003271	ENSMUSG00000027952	ENSMUSG00000025198	ENSMUSG00000001467	ENSMUSG00000006517	ENSMUSG00000049313	ENSMUSG00000028048
GO:BP	carboxylic acid metabolic process	GO:0019752	2.54095e-07	6.595	820	965	82	20346	ENSMUSG00000033427	ENSMUSG00000029695	ENSMUSG00000010175	ENSMUSG00000030268	ENSMUSG00000004885	ENSMUSG00000053279	ENSMUSG00000022040	ENSMUSG00000046402	ENSMUSG00000058022	ENSMUSG00000033308	ENSMUSG00000074207	ENSMUSG00000042684	ENSMUSG00000022383	ENSMUSG00000000320	ENSMUSG00000028893	ENSMUSG00000028607	ENSMUSG00000028341	ENSMUSG00000046971	ENSMUSG00000030747	ENSMUSG00000027533	ENSMUSG00000034744	ENSMUSG00000020405	ENSMUSG00000062908	ENSMUSG00000032715	ENSMUSG00000031700	ENSMUSG00000047443	ENSMUSG00000024378	ENSMUSG00000026473	ENSMUSG00000045294	ENSMUSG00000013846	ENSMUSG00000036880	ENSMUSG00000021457	ENSMUSG00000025059	ENSMUSG00000006378	ENSMUSG00000018796	ENSMUSG00000031483	ENSMUSG00000039529	ENSMUSG00000027710	ENSMUSG00000028479	ENSMUSG00000017390	ENSMUSG00000030630
GO:BP	lipid biosynthetic process	GO:0008610	3.30649e-07	6.48063	531	893	58	20346	ENSMUSG00000010175	ENSMUSG00000026170	ENSMUSG00000004885	ENSMUSG00000031844	ENSMUSG00000053279	ENSMUSG00000046402	ENSMUSG00000039092	ENSMUSG00000070644	ENSMUSG00000029154	ENSMUSG00000033520	ENSMUSG00000075593	ENSMUSG00000000320	ENSMUSG00000021148	ENSMUSG00000046971	ENSMUSG00000030747	ENSMUSG00000027533	ENSMUSG00000032715	ENSMUSG00000003555	ENSMUSG00000024378	ENSMUSG00000030792	ENSMUSG00000058454	ENSMUSG00000045294	ENSMUSG00000041939	ENSMUSG00000034308	ENSMUSG00000032193	ENSMUSG00000018796	ENSMUSG00000031483	ENSMUSG00000022351	ENSMUSG00000037940	ENSMUSG00000031604	ENSMUSG00000059743	ENSMUSG00000025950	ENSMUSG00000042289	ENSMUSG00000034926	ENSMUSG00000033174	ENSMUSG00000025277	ENSMUSG00000060675	ENSMUSG00000027605	ENSMUSG00000027695	ENSMUSG00000036775	ENSMUSG00000024659
GO:BP	organic acid metabolic process	GO:0006082	4.37332e-07	6.35919	873	965	85	20346	ENSMUSG00000033427	ENSMUSG00000029695	ENSMUSG00000010175	ENSMUSG00000030268	ENSMUSG00000004885	ENSMUSG00000053279	ENSMUSG00000022040	ENSMUSG00000046402	ENSMUSG00000058022	ENSMUSG00000033308	ENSMUSG00000074207	ENSMUSG00000042684	ENSMUSG00000022383	ENSMUSG00000021338	ENSMUSG00000000320	ENSMUSG00000028893	ENSMUSG00000028607	ENSMUSG00000028341	ENSMUSG00000046971	ENSMUSG00000030747	ENSMUSG00000027533	ENSMUSG00000034744	ENSMUSG00000020405	ENSMUSG00000062908	ENSMUSG00000032715	ENSMUSG00000031700	ENSMUSG00000047443	ENSMUSG00000024378	ENSMUSG00000026473	ENSMUSG00000045294	ENSMUSG00000013846	ENSMUSG00000036880	ENSMUSG00000021457	ENSMUSG00000040181	ENSMUSG00000025059	ENSMUSG00000006378	ENSMUSG00000018796	ENSMUSG00000031483	ENSMUSG00000039529	ENSMUSG00000027710	ENSMUSG00000028479
GO:BP	fatty acid metabolic process	GO:0006631	5.39519e-07	6.26799	327	949	44	20346	ENSMUSG00000022040	ENSMUSG00000058022	ENSMUSG00000022383	ENSMUSG00000000320	ENSMUSG00000028893	ENSMUSG00000028607	ENSMUSG00000028341	ENSMUSG00000046971	ENSMUSG00000030747	ENSMUSG00000027533	ENSMUSG00000062908	ENSMUSG00000032715	ENSMUSG00000047443	ENSMUSG00000045294	ENSMUSG00000036880	ENSMUSG00000025059	ENSMUSG00000018796	ENSMUSG00000031483	ENSMUSG00000027710	ENSMUSG00000021947	ENSMUSG00000039206	ENSMUSG00000033174	ENSMUSG00000032281	ENSMUSG00000055301	ENSMUSG00000027605	ENSMUSG00000027984	ENSMUSG00000072949	ENSMUSG00000036775	ENSMUSG00000024659	ENSMUSG00000025198	ENSMUSG00000021226	ENSMUSG00000026003	ENSMUSG00000021367	ENSMUSG00000059447	ENSMUSG00000038894	ENSMUSG00000029482	ENSMUSG00000074272	ENSMUSG00000059316	ENSMUSG00000031278	ENSMUSG00000028937	ENSMUSG00000032540
GO:BP	oxoacid metabolic process	GO:0043436	8.36522e-07	6.07752	855	965	83	20346	ENSMUSG00000033427	ENSMUSG00000029695	ENSMUSG00000010175	ENSMUSG00000030268	ENSMUSG00000004885	ENSMUSG00000053279	ENSMUSG00000022040	ENSMUSG00000046402	ENSMUSG00000058022	ENSMUSG00000033308	ENSMUSG00000074207	ENSMUSG00000042684	ENSMUSG00000022383	ENSMUSG00000000320	ENSMUSG00000028893	ENSMUSG00000028607	ENSMUSG00000028341	ENSMUSG00000046971	ENSMUSG00000030747	ENSMUSG00000027533	ENSMUSG00000034744	ENSMUSG00000020405	ENSMUSG00000062908	ENSMUSG00000032715	ENSMUSG00000031700	ENSMUSG00000047443	ENSMUSG00000024378	ENSMUSG00000026473	ENSMUSG00000045294	ENSMUSG00000013846	ENSMUSG00000036880	ENSMUSG00000021457	ENSMUSG00000025059	ENSMUSG00000006378	ENSMUSG00000018796	ENSMUSG00000031483	ENSMUSG00000039529	ENSMUSG00000027710	ENSMUSG00000028479	ENSMUSG00000017390	ENSMUSG00000030630
GO:BP	anatomical structure development	GO:0048856	1.1736e-06	5.93048	5394	981	345	20346	ENSMUSG00000033427	ENSMUSG00000030307	ENSMUSG00000002633	ENSMUSG00000055027	ENSMUSG00000025491	ENSMUSG00000010175	ENSMUSG00000036466	ENSMUSG00000035158	ENSMUSG00000022986	ENSMUSG00000025876	ENSMUSG00000028681	ENSMUSG00000004885	ENSMUSG00000029671	ENSMUSG00000020140	ENSMUSG00000024109	ENSMUSG00000020218	ENSMUSG00000039683	ENSMUSG00000021508	ENSMUSG00000025582	ENSMUSG00000031844	ENSMUSG00000017491	ENSMUSG00000059668	ENSMUSG00000049107	ENSMUSG00000027186	ENSMUSG00000044748	ENSMUSG00000040605	ENSMUSG00000053279	ENSMUSG00000046402	ENSMUSG00000058022	ENSMUSG00000045539	ENSMUSG00000027500	ENSMUSG00000023886	ENSMUSG00000043924	ENSMUSG00000028289	ENSMUSG00000016918	ENSMUSG00000070990	ENSMUSG00000050957	ENSMUSG00000051367	ENSMUSG00000035305	ENSMUSG00000028386	ENSMUSG00000070644
GO:BP	multicellular organism development	GO:0007275	1.23606e-06	5.90796	4961	981	322	20346	ENSMUSG00000033427	ENSMUSG00000030307	ENSMUSG00000002633	ENSMUSG00000055027	ENSMUSG00000025491	ENSMUSG00000010175	ENSMUSG00000036466	ENSMUSG00000035158	ENSMUSG00000022986	ENSMUSG00000025876	ENSMUSG00000028681	ENSMUSG00000004885	ENSMUSG00000029671	ENSMUSG00000020140	ENSMUSG00000024109	ENSMUSG00000020218	ENSMUSG00000039683	ENSMUSG00000021508	ENSMUSG00000025582	ENSMUSG00000031844	ENSMUSG00000017491	ENSMUSG00000059668	ENSMUSG00000049107	ENSMUSG00000027186	ENSMUSG00000040605	ENSMUSG00000053279	ENSMUSG00000046402	ENSMUSG00000058022	ENSMUSG00000045539	ENSMUSG00000027500	ENSMUSG00000023886	ENSMUSG00000043924	ENSMUSG00000028289	ENSMUSG00000016918	ENSMUSG00000070990	ENSMUSG00000050957	ENSMUSG00000051367	ENSMUSG00000035305	ENSMUSG00000028386	ENSMUSG00000070644	ENSMUSG00000025407
GO:BP	skin development	GO:0043588	1.27247e-06	5.89535	240	641	29	20346	ENSMUSG00000002633	ENSMUSG00000028681	ENSMUSG00000029671	ENSMUSG00000020140	ENSMUSG00000045539	ENSMUSG00000070990	ENSMUSG00000033508	ENSMUSG00000050295	ENSMUSG00000022512	ENSMUSG00000046834	ENSMUSG00000000320	ENSMUSG00000061517	ENSMUSG00000050359	ENSMUSG00000026185	ENSMUSG00000022218	ENSMUSG00000005355	ENSMUSG00000063651	ENSMUSG00000022996	ENSMUSG00000035273	ENSMUSG00000022123	ENSMUSG00000034282	ENSMUSG00000047501	ENSMUSG00000006445	ENSMUSG00000059327	ENSMUSG00000037188	ENSMUSG00000034926	ENSMUSG00000024922	ENSMUSG00000035557	ENSMUSG00000024659
GO:BP	sterol biosynthetic process	GO:0016126	1.91297e-06	5.71829	50	991	16	20346	ENSMUSG00000033520	ENSMUSG00000021148	ENSMUSG00000058454	ENSMUSG00000045294	ENSMUSG00000041939	ENSMUSG00000031483	ENSMUSG00000022351	ENSMUSG00000031604	ENSMUSG00000059743	ENSMUSG00000034926	ENSMUSG00000027952	ENSMUSG00000025198	ENSMUSG00000001467	ENSMUSG00000006517	ENSMUSG00000032018	ENSMUSG00000021273
GO:BP	response to external stimulus	GO:0009605	2.31506e-06	5.63544	2468	949	178	20346	ENSMUSG00000002633	ENSMUSG00000025491	ENSMUSG00000010175	ENSMUSG00000025876	ENSMUSG00000030107	ENSMUSG00000024109	ENSMUSG00000021508	ENSMUSG00000046354	ENSMUSG00000049107	ENSMUSG00000044748	ENSMUSG00000029322	ENSMUSG00000023913	ENSMUSG00000046402	ENSMUSG00000058022	ENSMUSG00000023886	ENSMUSG00000028289	ENSMUSG00000013643	ENSMUSG00000041012	ENSMUSG00000028393	ENSMUSG00000020407	ENSMUSG00000061762	ENSMUSG00000033308	ENSMUSG00000020635	ENSMUSG00000037035	ENSMUSG00000045136	ENSMUSG00000069917	ENSMUSG00000028749	ENSMUSG00000022512	ENSMUSG00000022383	ENSMUSG00000046834	ENSMUSG00000037362	ENSMUSG00000026535	ENSMUSG00000027347	ENSMUSG00000036273	ENSMUSG00000021466	ENSMUSG00000069919	ENSMUSG00000026879	ENSMUSG00000045871	ENSMUSG00000030793	ENSMUSG00000021565	ENSMUSG00000032202
GO:BP	organic substance catabolic process	GO:1901575	3.24207e-06	5.48918	1604	907	123	20346	ENSMUSG00000033427	ENSMUSG00000002633	ENSMUSG00000029695	ENSMUSG00000024526	ENSMUSG00000030268	ENSMUSG00000030107	ENSMUSG00000023913	ENSMUSG00000032841	ENSMUSG00000022040	ENSMUSG00000058022	ENSMUSG00000027761	ENSMUSG00000044734	ENSMUSG00000028393	ENSMUSG00000042988	ENSMUSG00000046794	ENSMUSG00000020407	ENSMUSG00000033308	ENSMUSG00000023960	ENSMUSG00000074207	ENSMUSG00000055652	ENSMUSG00000028749	ENSMUSG00000042684	ENSMUSG00000022383	ENSMUSG00000057719	ENSMUSG00000036273	ENSMUSG00000027639	ENSMUSG00000059456	ENSMUSG00000028893	ENSMUSG00000029134	ENSMUSG00000037852	ENSMUSG00000046971	ENSMUSG00000034744	ENSMUSG00000053846	ENSMUSG00000062908	ENSMUSG00000074093	ENSMUSG00000032715	ENSMUSG00000045502	ENSMUSG00000022996	ENSMUSG00000031700	ENSMUSG00000075296	ENSMUSG00000035273
GO:BP	regulation of response to external stimulus	GO:0032101	3.7424e-06	5.42685	852	832	73	20346	ENSMUSG00000002633	ENSMUSG00000030107	ENSMUSG00000024109	ENSMUSG00000021508	ENSMUSG00000049107	ENSMUSG00000023913	ENSMUSG00000058022	ENSMUSG00000023886	ENSMUSG00000061762	ENSMUSG00000020635	ENSMUSG00000045136	ENSMUSG00000022383	ENSMUSG00000046834	ENSMUSG00000037362	ENSMUSG00000026535	ENSMUSG00000027347	ENSMUSG00000036273	ENSMUSG00000030793	ENSMUSG00000027639	ENSMUSG00000000320	ENSMUSG00000059456	ENSMUSG00000037025	ENSMUSG00000001123	ENSMUSG00000028539	ENSMUSG00000032380	ENSMUSG00000032238	ENSMUSG00000060477	ENSMUSG00000018899	ENSMUSG00000044594	ENSMUSG00000035273	ENSMUSG00000029217	ENSMUSG00000039208	ENSMUSG00000021025	ENSMUSG00000042244	ENSMUSG00000041939	ENSMUSG00000021457	ENSMUSG00000041135	ENSMUSG00000032193	ENSMUSG00000031558	ENSMUSG00000025473	ENSMUSG00000027298
GO:BP	cell differentiation	GO:0030154	4.2627e-06	5.37032	3841	968	256	20346	ENSMUSG00000002633	ENSMUSG00000055027	ENSMUSG00000025491	ENSMUSG00000010175	ENSMUSG00000035158	ENSMUSG00000022986	ENSMUSG00000025876	ENSMUSG00000028681	ENSMUSG00000004885	ENSMUSG00000029671	ENSMUSG00000020140	ENSMUSG00000024109	ENSMUSG00000020218	ENSMUSG00000039683	ENSMUSG00000021508	ENSMUSG00000025582	ENSMUSG00000017491	ENSMUSG00000059668	ENSMUSG00000049107	ENSMUSG00000027186	ENSMUSG00000044748	ENSMUSG00000040605	ENSMUSG00000029322	ENSMUSG00000046402	ENSMUSG00000045539	ENSMUSG00000027500	ENSMUSG00000043924	ENSMUSG00000028289	ENSMUSG00000016918	ENSMUSG00000050957	ENSMUSG00000051367	ENSMUSG00000035305	ENSMUSG00000028386	ENSMUSG00000025407	ENSMUSG00000047143	ENSMUSG00000029335	ENSMUSG00000022330	ENSMUSG00000025432	ENSMUSG00000029602	ENSMUSG00000050623	ENSMUSG00000020635
GO:BP	negative regulation of biological process	GO:0048519	4.88067e-06	5.31152	5055	978	323	20346	ENSMUSG00000002633	ENSMUSG00000055027	ENSMUSG00000025491	ENSMUSG00000071562	ENSMUSG00000010175	ENSMUSG00000035158	ENSMUSG00000024526	ENSMUSG00000071561	ENSMUSG00000029671	ENSMUSG00000024109	ENSMUSG00000022871	ENSMUSG00000020218	ENSMUSG00000021508	ENSMUSG00000017491	ENSMUSG00000059668	ENSMUSG00000049107	ENSMUSG00000027186	ENSMUSG00000040605	ENSMUSG00000029322	ENSMUSG00000053279	ENSMUSG00000079594	ENSMUSG00000032841	ENSMUSG00000022598	ENSMUSG00000058022	ENSMUSG00000027500	ENSMUSG00000044734	ENSMUSG00000034339	ENSMUSG00000028289	ENSMUSG00000006342	ENSMUSG00000016918	ENSMUSG00000070990	ENSMUSG00000050957	ENSMUSG00000051367	ENSMUSG00000028393	ENSMUSG00000028386	ENSMUSG00000025407	ENSMUSG00000042988	ENSMUSG00000022330	ENSMUSG00000026981	ENSMUSG00000061762	ENSMUSG00000025432
GO:BP	regulation of multicellular organismal process	GO:0051239	8.5392e-06	5.06858	3028	968	210	20346	ENSMUSG00000002633	ENSMUSG00000025491	ENSMUSG00000010175	ENSMUSG00000035158	ENSMUSG00000027674	ENSMUSG00000024526	ENSMUSG00000028681	ENSMUSG00000004885	ENSMUSG00000024109	ENSMUSG00000039683	ENSMUSG00000025582	ENSMUSG00000017491	ENSMUSG00000049107	ENSMUSG00000029322	ENSMUSG00000053279	ENSMUSG00000046402	ENSMUSG00000058022	ENSMUSG00000027500	ENSMUSG00000023886	ENSMUSG00000043924	ENSMUSG00000028289	ENSMUSG00000016918	ENSMUSG00000051367	ENSMUSG00000028386	ENSMUSG00000025407	ENSMUSG00000047143	ENSMUSG00000022330	ENSMUSG00000026981	ENSMUSG00000061762	ENSMUSG00000025432	ENSMUSG00000029602	ENSMUSG00000020635	ENSMUSG00000037035	ENSMUSG00000029378	ENSMUSG00000048138	ENSMUSG00000045136	ENSMUSG00000050295	ENSMUSG00000022383	ENSMUSG00000037362	ENSMUSG00000032064	ENSMUSG00000027347
GO:BP	regulation of molecular function	GO:0065009	1.16135e-05	4.93504	2966	957	204	20346	ENSMUSG00000002633	ENSMUSG00000071562	ENSMUSG00000010175	ENSMUSG00000071561	ENSMUSG00000042216	ENSMUSG00000030666	ENSMUSG00000026875	ENSMUSG00000024109	ENSMUSG00000022871	ENSMUSG00000021508	ENSMUSG00000025582	ENSMUSG00000049107	ENSMUSG00000039364	ENSMUSG00000026961	ENSMUSG00000079594	ENSMUSG00000022598	ENSMUSG00000044734	ENSMUSG00000034339	ENSMUSG00000028289	ENSMUSG00000041012	ENSMUSG00000050957	ENSMUSG00000035305	ENSMUSG00000030257	ENSMUSG00000029335	ENSMUSG00000046794	ENSMUSG00000026981	ENSMUSG00000029602	ENSMUSG00000034362	ENSMUSG00000020635	ENSMUSG00000037035	ENSMUSG00000029378	ENSMUSG00000050295	ENSMUSG00000022383	ENSMUSG00000037362	ENSMUSG00000052572	ENSMUSG00000026535	ENSMUSG00000057719	ENSMUSG00000027347	ENSMUSG00000029120	ENSMUSG00000036273	ENSMUSG00000021466
GO:BP	animal organ development	GO:0048513	1.16421e-05	4.93397	3299	548	141	20346	ENSMUSG00000033427	ENSMUSG00000030307	ENSMUSG00000002633	ENSMUSG00000055027	ENSMUSG00000010175	ENSMUSG00000036466	ENSMUSG00000035158	ENSMUSG00000022986	ENSMUSG00000028681	ENSMUSG00000029671	ENSMUSG00000020140	ENSMUSG00000024109	ENSMUSG00000039683	ENSMUSG00000021508	ENSMUSG00000031844	ENSMUSG00000017491	ENSMUSG00000049107	ENSMUSG00000027186	ENSMUSG00000053279	ENSMUSG00000046402	ENSMUSG00000045539	ENSMUSG00000028289	ENSMUSG00000016918	ENSMUSG00000070990	ENSMUSG00000050957	ENSMUSG00000051367	ENSMUSG00000035305	ENSMUSG00000028386	ENSMUSG00000070644	ENSMUSG00000025407	ENSMUSG00000047143	ENSMUSG00000029335	ENSMUSG00000022330	ENSMUSG00000033508	ENSMUSG00000037035	ENSMUSG00000038112	ENSMUSG00000029378	ENSMUSG00000021604	ENSMUSG00000069917	ENSMUSG00000050295	ENSMUSG00000022512
GO:BP	negative regulation of cellular process	GO:0048523	1.33904e-05	4.87321	4533	978	293	20346	ENSMUSG00000002633	ENSMUSG00000055027	ENSMUSG00000025491	ENSMUSG00000071562	ENSMUSG00000010175	ENSMUSG00000035158	ENSMUSG00000024526	ENSMUSG00000071561	ENSMUSG00000029671	ENSMUSG00000024109	ENSMUSG00000022871	ENSMUSG00000020218	ENSMUSG00000021508	ENSMUSG00000017491	ENSMUSG00000059668	ENSMUSG00000049107	ENSMUSG00000027186	ENSMUSG00000040605	ENSMUSG00000029322	ENSMUSG00000079594	ENSMUSG00000032841	ENSMUSG00000022598	ENSMUSG00000058022	ENSMUSG00000027500	ENSMUSG00000044734	ENSMUSG00000034339	ENSMUSG00000028289	ENSMUSG00000006342	ENSMUSG00000016918	ENSMUSG00000070990	ENSMUSG00000050957	ENSMUSG00000051367	ENSMUSG00000028393	ENSMUSG00000028386	ENSMUSG00000025407	ENSMUSG00000042988	ENSMUSG00000022330	ENSMUSG00000026981	ENSMUSG00000025432	ENSMUSG00000029602	ENSMUSG00000034362
GO:BP	catabolic process	GO:0009056	1.41245e-05	4.85003	1911	907	138	20346	ENSMUSG00000033427	ENSMUSG00000002633	ENSMUSG00000029695	ENSMUSG00000024526	ENSMUSG00000030268	ENSMUSG00000030107	ENSMUSG00000023913	ENSMUSG00000032841	ENSMUSG00000022040	ENSMUSG00000058022	ENSMUSG00000027761	ENSMUSG00000044734	ENSMUSG00000028393	ENSMUSG00000042988	ENSMUSG00000046794	ENSMUSG00000020407	ENSMUSG00000033308	ENSMUSG00000023960	ENSMUSG00000074207	ENSMUSG00000055652	ENSMUSG00000028749	ENSMUSG00000042684	ENSMUSG00000022383	ENSMUSG00000057719	ENSMUSG00000027890	ENSMUSG00000036273	ENSMUSG00000030793	ENSMUSG00000027639	ENSMUSG00000059456	ENSMUSG00000028893	ENSMUSG00000029134	ENSMUSG00000037852	ENSMUSG00000046971	ENSMUSG00000034744	ENSMUSG00000053846	ENSMUSG00000028713	ENSMUSG00000062908	ENSMUSG00000074093	ENSMUSG00000032715	ENSMUSG00000045502	ENSMUSG00000022996
GO:BP	response to stress	GO:0006950	1.54777e-05	4.81029	3340	968	226	20346	ENSMUSG00000002633	ENSMUSG00000025491	ENSMUSG00000030107	ENSMUSG00000029671	ENSMUSG00000046354	ENSMUSG00000044748	ENSMUSG00000040605	ENSMUSG00000029322	ENSMUSG00000053279	ENSMUSG00000023913	ENSMUSG00000032841	ENSMUSG00000022040	ENSMUSG00000058022	ENSMUSG00000023886	ENSMUSG00000013643	ENSMUSG00000028393	ENSMUSG00000025407	ENSMUSG00000037161	ENSMUSG00000020407	ENSMUSG00000026981	ENSMUSG00000061762	ENSMUSG00000006143	ENSMUSG00000020635	ENSMUSG00000037035	ENSMUSG00000029378	ENSMUSG00000028749	ENSMUSG00000022512	ENSMUSG00000022383	ENSMUSG00000046834	ENSMUSG00000037362	ENSMUSG00000030873	ENSMUSG00000026535	ENSMUSG00000032064	ENSMUSG00000057719	ENSMUSG00000027347	ENSMUSG00000003051	ENSMUSG00000036273	ENSMUSG00000027463	ENSMUSG00000026879	ENSMUSG00000030793	ENSMUSG00000030287
GO:BP	regulation of multicellular organismal development	GO:2000026	1.58569e-05	4.79978	2019	981	153	20346	ENSMUSG00000002633	ENSMUSG00000010175	ENSMUSG00000035158	ENSMUSG00000028681	ENSMUSG00000004885	ENSMUSG00000024109	ENSMUSG00000039683	ENSMUSG00000025582	ENSMUSG00000017491	ENSMUSG00000049107	ENSMUSG00000046402	ENSMUSG00000027500	ENSMUSG00000023886	ENSMUSG00000043924	ENSMUSG00000028289	ENSMUSG00000016918	ENSMUSG00000051367	ENSMUSG00000028386	ENSMUSG00000025407	ENSMUSG00000047143	ENSMUSG00000022330	ENSMUSG00000026981	ENSMUSG00000025432	ENSMUSG00000029602	ENSMUSG00000020635	ENSMUSG00000048138	ENSMUSG00000045136	ENSMUSG00000050295	ENSMUSG00000022383	ENSMUSG00000032064	ENSMUSG00000027347	ENSMUSG00000036273	ENSMUSG00000021466	ENSMUSG00000045871	ENSMUSG00000026304	ENSMUSG00000022018	ENSMUSG00000000320	ENSMUSG00000052087	ENSMUSG00000022469	ENSMUSG00000059456	ENSMUSG00000037025
GO:BP	lipid catabolic process	GO:0016042	1.74887e-05	4.75724	265	904	35	20346	ENSMUSG00000024526	ENSMUSG00000023913	ENSMUSG00000058022	ENSMUSG00000027761	ENSMUSG00000028749	ENSMUSG00000028893	ENSMUSG00000029134	ENSMUSG00000046971	ENSMUSG00000053846	ENSMUSG00000062908	ENSMUSG00000045502	ENSMUSG00000036880	ENSMUSG00000032193	ENSMUSG00000010660	ENSMUSG00000025950	ENSMUSG00000042289	ENSMUSG00000056078	ENSMUSG00000039206	ENSMUSG00000033174	ENSMUSG00000025277	ENSMUSG00000060675	ENSMUSG00000027695	ENSMUSG00000027984	ENSMUSG00000074604	ENSMUSG00000021226	ENSMUSG00000026003	ENSMUSG00000037049	ENSMUSG00000028048	ENSMUSG00000059447	ENSMUSG00000038894	ENSMUSG00000059316	ENSMUSG00000028937	ENSMUSG00000032540	ENSMUSG00000030825	ENSMUSG00000032046
GO:BP	cholesterol biosynthetic process	GO:0006695	2.35075e-05	4.62879	44	991	14	20346	ENSMUSG00000033520	ENSMUSG00000021148	ENSMUSG00000058454	ENSMUSG00000045294	ENSMUSG00000041939	ENSMUSG00000031483	ENSMUSG00000059743	ENSMUSG00000034926	ENSMUSG00000027952	ENSMUSG00000025198	ENSMUSG00000001467	ENSMUSG00000006517	ENSMUSG00000032018	ENSMUSG00000021273
GO:BP	secondary alcohol biosynthetic process	GO:1902653	2.35075e-05	4.62879	44	991	14	20346	ENSMUSG00000033520	ENSMUSG00000021148	ENSMUSG00000058454	ENSMUSG00000045294	ENSMUSG00000041939	ENSMUSG00000031483	ENSMUSG00000059743	ENSMUSG00000034926	ENSMUSG00000027952	ENSMUSG00000025198	ENSMUSG00000001467	ENSMUSG00000006517	ENSMUSG00000032018	ENSMUSG00000021273
GO:BP	epithelial cell differentiation	GO:0030855	3.49172e-05	4.45696	591	979	61	20346	ENSMUSG00000010175	ENSMUSG00000028681	ENSMUSG00000029671	ENSMUSG00000017491	ENSMUSG00000059668	ENSMUSG00000027186	ENSMUSG00000045539	ENSMUSG00000051367	ENSMUSG00000025407	ENSMUSG00000050295	ENSMUSG00000022512	ENSMUSG00000003051	ENSMUSG00000021466	ENSMUSG00000045871	ENSMUSG00000054612	ENSMUSG00000022469	ENSMUSG00000050359	ENSMUSG00000037025	ENSMUSG00000022218	ENSMUSG00000005355	ENSMUSG00000063651	ENSMUSG00000049436	ENSMUSG00000042207	ENSMUSG00000022996	ENSMUSG00000021636	ENSMUSG00000020717	ENSMUSG00000031214	ENSMUSG00000022123	ENSMUSG00000046223	ENSMUSG00000034282	ENSMUSG00000006445	ENSMUSG00000017390	ENSMUSG00000043895	ENSMUSG00000003271	ENSMUSG00000020592	ENSMUSG00000035557	ENSMUSG00000008601	ENSMUSG00000024659	ENSMUSG00000026383	ENSMUSG00000033088	ENSMUSG00000027447
GO:BP	regulation of steroid metabolic process	GO:0019218	4.26973e-05	4.3696	99	503	15	20346	ENSMUSG00000010175	ENSMUSG00000022040	ENSMUSG00000033520	ENSMUSG00000021148	ENSMUSG00000037025	ENSMUSG00000030747	ENSMUSG00000032238	ENSMUSG00000003555	ENSMUSG00000024378	ENSMUSG00000030792	ENSMUSG00000058454	ENSMUSG00000045294	ENSMUSG00000032193	ENSMUSG00000031483	ENSMUSG00000059743
GO:BP	developmental process	GO:0032502	4.45403e-05	4.35125	5815	968	354	20346	ENSMUSG00000033427	ENSMUSG00000030307	ENSMUSG00000002633	ENSMUSG00000055027	ENSMUSG00000025491	ENSMUSG00000010175	ENSMUSG00000036466	ENSMUSG00000035158	ENSMUSG00000022986	ENSMUSG00000025876	ENSMUSG00000028681	ENSMUSG00000004885	ENSMUSG00000029671	ENSMUSG00000020140	ENSMUSG00000024109	ENSMUSG00000020218	ENSMUSG00000039683	ENSMUSG00000021508	ENSMUSG00000025582	ENSMUSG00000031844	ENSMUSG00000017491	ENSMUSG00000059668	ENSMUSG00000049107	ENSMUSG00000027186	ENSMUSG00000044748	ENSMUSG00000040605	ENSMUSG00000029322	ENSMUSG00000053279	ENSMUSG00000046402	ENSMUSG00000058022	ENSMUSG00000045539	ENSMUSG00000027500	ENSMUSG00000023886	ENSMUSG00000043924	ENSMUSG00000028289	ENSMUSG00000016918	ENSMUSG00000070990	ENSMUSG00000050957	ENSMUSG00000051367	ENSMUSG00000035305	ENSMUSG00000028386
GO:BP	regulation of developmental process	GO:0050793	4.96414e-05	4.30416	2581	690	138	20346	ENSMUSG00000002633	ENSMUSG00000055027	ENSMUSG00000025491	ENSMUSG00000010175	ENSMUSG00000035158	ENSMUSG00000028681	ENSMUSG00000004885	ENSMUSG00000024109	ENSMUSG00000020218	ENSMUSG00000039683	ENSMUSG00000021508	ENSMUSG00000025582	ENSMUSG00000017491	ENSMUSG00000049107	ENSMUSG00000027186	ENSMUSG00000029322	ENSMUSG00000046402	ENSMUSG00000027500	ENSMUSG00000023886	ENSMUSG00000043924	ENSMUSG00000028289	ENSMUSG00000016918	ENSMUSG00000051367	ENSMUSG00000028386	ENSMUSG00000025407	ENSMUSG00000047143	ENSMUSG00000022330	ENSMUSG00000026981	ENSMUSG00000025432	ENSMUSG00000029602	ENSMUSG00000020635	ENSMUSG00000029378	ENSMUSG00000048138	ENSMUSG00000045136	ENSMUSG00000050295	ENSMUSG00000022383	ENSMUSG00000037362	ENSMUSG00000032064	ENSMUSG00000027347	ENSMUSG00000021338	ENSMUSG00000036273
GO:BP	cellular developmental process	GO:0048869	5.25333e-05	4.27957	4019	968	260	20346	ENSMUSG00000002633	ENSMUSG00000055027	ENSMUSG00000025491	ENSMUSG00000010175	ENSMUSG00000035158	ENSMUSG00000022986	ENSMUSG00000025876	ENSMUSG00000028681	ENSMUSG00000004885	ENSMUSG00000029671	ENSMUSG00000020140	ENSMUSG00000024109	ENSMUSG00000020218	ENSMUSG00000039683	ENSMUSG00000021508	ENSMUSG00000025582	ENSMUSG00000017491	ENSMUSG00000059668	ENSMUSG00000049107	ENSMUSG00000027186	ENSMUSG00000044748	ENSMUSG00000040605	ENSMUSG00000029322	ENSMUSG00000046402	ENSMUSG00000045539	ENSMUSG00000027500	ENSMUSG00000043924	ENSMUSG00000028289	ENSMUSG00000016918	ENSMUSG00000050957	ENSMUSG00000051367	ENSMUSG00000035305	ENSMUSG00000028386	ENSMUSG00000025407	ENSMUSG00000047143	ENSMUSG00000029335	ENSMUSG00000022330	ENSMUSG00000025432	ENSMUSG00000029602	ENSMUSG00000050623	ENSMUSG00000020635
GO:BP	steroid biosynthetic process	GO:0006694	5.86904e-05	4.23143	151	738	22	20346	ENSMUSG00000010175	ENSMUSG00000026170	ENSMUSG00000031844	ENSMUSG00000033520	ENSMUSG00000021148	ENSMUSG00000003555	ENSMUSG00000024378	ENSMUSG00000030792	ENSMUSG00000058454	ENSMUSG00000045294	ENSMUSG00000041939	ENSMUSG00000034308	ENSMUSG00000031483	ENSMUSG00000022351	ENSMUSG00000031604	ENSMUSG00000059743	ENSMUSG00000042289	ENSMUSG00000034926	ENSMUSG00000027952	ENSMUSG00000025198	ENSMUSG00000001467	ENSMUSG00000006517
GO:BP	epidermis development	GO:0008544	6.58585e-05	4.18139	288	673	30	20346	ENSMUSG00000002633	ENSMUSG00000028681	ENSMUSG00000029671	ENSMUSG00000020140	ENSMUSG00000049107	ENSMUSG00000045539	ENSMUSG00000070990	ENSMUSG00000025407	ENSMUSG00000050295	ENSMUSG00000022383	ENSMUSG00000021466	ENSMUSG00000045871	ENSMUSG00000061517	ENSMUSG00000050359	ENSMUSG00000026185	ENSMUSG00000022218	ENSMUSG00000005355	ENSMUSG00000063651	ENSMUSG00000022996	ENSMUSG00000035273	ENSMUSG00000022123	ENSMUSG00000034282	ENSMUSG00000006445	ENSMUSG00000059327	ENSMUSG00000037188	ENSMUSG00000003271	ENSMUSG00000024922	ENSMUSG00000035557	ENSMUSG00000024659	ENSMUSG00000033088
GO:BP	positive regulation of biological process	GO:0048518	7.83677e-05	4.10586	5559	960	337	20346	ENSMUSG00000026058	ENSMUSG00000002633	ENSMUSG00000055027	ENSMUSG00000025491	ENSMUSG00000010175	ENSMUSG00000035158	ENSMUSG00000027674	ENSMUSG00000028699	ENSMUSG00000024526	ENSMUSG00000028681	ENSMUSG00000042216	ENSMUSG00000004885	ENSMUSG00000026875	ENSMUSG00000029671	ENSMUSG00000020140	ENSMUSG00000024109	ENSMUSG00000020218	ENSMUSG00000021508	ENSMUSG00000017491	ENSMUSG00000049107	ENSMUSG00000027186	ENSMUSG00000026961	ENSMUSG00000029727	ENSMUSG00000044748	ENSMUSG00000029322	ENSMUSG00000053279	ENSMUSG00000023913	ENSMUSG00000032841	ENSMUSG00000022040	ENSMUSG00000058022	ENSMUSG00000027500	ENSMUSG00000023886	ENSMUSG00000027761	ENSMUSG00000043924	ENSMUSG00000028289	ENSMUSG00000016918	ENSMUSG00000070990	ENSMUSG00000051367	ENSMUSG00000035305	ENSMUSG00000025407	ENSMUSG00000047143
GO:BP	response to wounding	GO:0009611	7.85565e-05	4.10482	498	968	53	20346	ENSMUSG00000002633	ENSMUSG00000058022	ENSMUSG00000023886	ENSMUSG00000025407	ENSMUSG00000020635	ENSMUSG00000037035	ENSMUSG00000022383	ENSMUSG00000037362	ENSMUSG00000030873	ENSMUSG00000026879	ENSMUSG00000032202	ENSMUSG00000000320	ENSMUSG00000000216	ENSMUSG00000039115	ENSMUSG00000037025	ENSMUSG00000062345	ENSMUSG00000030790	ENSMUSG00000022996	ENSMUSG00000020717	ENSMUSG00000035273	ENSMUSG00000029217	ENSMUSG00000057315	ENSMUSG00000039007	ENSMUSG00000021457	ENSMUSG00000071369	ENSMUSG00000032068	ENSMUSG00000027298	ENSMUSG00000056071	ENSMUSG00000074637	ENSMUSG00000037188	ENSMUSG00000039942	ENSMUSG00000024486	ENSMUSG00000020592	ENSMUSG00000050761	ENSMUSG00000039384	ENSMUSG00000024659	ENSMUSG00000043811	ENSMUSG00000027447	ENSMUSG00000019942	ENSMUSG00000032231	ENSMUSG00000032456
GO:BP	response to toxic substance	GO:0009636	7.95732e-05	4.09923	537	245	24	20346	ENSMUSG00000002633	ENSMUSG00000053279	ENSMUSG00000022040	ENSMUSG00000028393	ENSMUSG00000006143	ENSMUSG00000020635	ENSMUSG00000029378	ENSMUSG00000074207	ENSMUSG00000069917	ENSMUSG00000022512	ENSMUSG00000022383	ENSMUSG00000036273	ENSMUSG00000069919	ENSMUSG00000026879	ENSMUSG00000052974	ENSMUSG00000030287	ENSMUSG00000054612	ENSMUSG00000052305	ENSMUSG00000018569	ENSMUSG00000059456	ENSMUSG00000028893	ENSMUSG00000032348	ENSMUSG00000028341	ENSMUSG00000024778
GO:BP	wound healing	GO:0042060	8.78591e-05	4.05621	378	968	44	20346	ENSMUSG00000002633	ENSMUSG00000058022	ENSMUSG00000023886	ENSMUSG00000022383	ENSMUSG00000037362	ENSMUSG00000030873	ENSMUSG00000026879	ENSMUSG00000032202	ENSMUSG00000000320	ENSMUSG00000000216	ENSMUSG00000039115	ENSMUSG00000037025	ENSMUSG00000062345	ENSMUSG00000022996	ENSMUSG00000020717	ENSMUSG00000035273	ENSMUSG00000029217	ENSMUSG00000057315	ENSMUSG00000039007	ENSMUSG00000021457	ENSMUSG00000071369	ENSMUSG00000032068	ENSMUSG00000027298	ENSMUSG00000056071	ENSMUSG00000074637	ENSMUSG00000037188	ENSMUSG00000039942	ENSMUSG00000024486	ENSMUSG00000020592	ENSMUSG00000050761	ENSMUSG00000039384	ENSMUSG00000024659	ENSMUSG00000032231	ENSMUSG00000001627	ENSMUSG00000059325	ENSMUSG00000074272	ENSMUSG00000001131	ENSMUSG00000034664	ENSMUSG00000032462	ENSMUSG00000028128	ENSMUSG00000028413
GO:BP	locomotion	GO:0040011	0.00010145	3.99375	1630	286	51	20346	ENSMUSG00000002633	ENSMUSG00000025491	ENSMUSG00000010175	ENSMUSG00000035158	ENSMUSG00000028699	ENSMUSG00000025876	ENSMUSG00000021508	ENSMUSG00000046354	ENSMUSG00000049107	ENSMUSG00000044748	ENSMUSG00000023913	ENSMUSG00000032841	ENSMUSG00000058022	ENSMUSG00000023886	ENSMUSG00000028289	ENSMUSG00000016918	ENSMUSG00000041012	ENSMUSG00000070990	ENSMUSG00000050957	ENSMUSG00000051367	ENSMUSG00000025407	ENSMUSG00000026981	ENSMUSG00000061762	ENSMUSG00000050623	ENSMUSG00000045136	ENSMUSG00000050295	ENSMUSG00000037362	ENSMUSG00000030873	ENSMUSG00000032064	ENSMUSG00000057719	ENSMUSG00000021338	ENSMUSG00000036273	ENSMUSG00000021466	ENSMUSG00000030793	ENSMUSG00000022018	ENSMUSG00000000320	ENSMUSG00000022469	ENSMUSG00000018569	ENSMUSG00000059456	ENSMUSG00000000216	ENSMUSG00000039115
GO:BP	regulation of small molecule metabolic process	GO:0062012	0.000107612	3.96814	321	447	25	20346	ENSMUSG00000010175	ENSMUSG00000022040	ENSMUSG00000046794	ENSMUSG00000033520	ENSMUSG00000022383	ENSMUSG00000021148	ENSMUSG00000059456	ENSMUSG00000028893	ENSMUSG00000037025	ENSMUSG00000028341	ENSMUSG00000030747	ENSMUSG00000027533	ENSMUSG00000026185	ENSMUSG00000032238	ENSMUSG00000062908	ENSMUSG00000032715	ENSMUSG00000047443	ENSMUSG00000024378	ENSMUSG00000030792	ENSMUSG00000058454	ENSMUSG00000045294	ENSMUSG00000025059	ENSMUSG00000032193	ENSMUSG00000010660	ENSMUSG00000031483
GO:BP	movement of cell or subcellular component	GO:0006928	0.000109793	3.95942	1782	286	54	20346	ENSMUSG00000002633	ENSMUSG00000025491	ENSMUSG00000010175	ENSMUSG00000035158	ENSMUSG00000028699	ENSMUSG00000025876	ENSMUSG00000021508	ENSMUSG00000046354	ENSMUSG00000049107	ENSMUSG00000044748	ENSMUSG00000023913	ENSMUSG00000032841	ENSMUSG00000058022	ENSMUSG00000023886	ENSMUSG00000028289	ENSMUSG00000016918	ENSMUSG00000070990	ENSMUSG00000050957	ENSMUSG00000051367	ENSMUSG00000025407	ENSMUSG00000037161	ENSMUSG00000026981	ENSMUSG00000061762	ENSMUSG00000050623	ENSMUSG00000045136	ENSMUSG00000050295	ENSMUSG00000037362	ENSMUSG00000052572	ENSMUSG00000030873	ENSMUSG00000032064	ENSMUSG00000057719	ENSMUSG00000027347	ENSMUSG00000021338	ENSMUSG00000036273	ENSMUSG00000021466	ENSMUSG00000030793	ENSMUSG00000022018	ENSMUSG00000000320	ENSMUSG00000022469	ENSMUSG00000018569	ENSMUSG00000059456
GO:BP	regulation of biological quality	GO:0065008	0.000117889	3.92853	3468	699	174	20346	ENSMUSG00000033427	ENSMUSG00000030307	ENSMUSG00000002633	ENSMUSG00000027674	ENSMUSG00000026170	ENSMUSG00000028699	ENSMUSG00000024526	ENSMUSG00000004885	ENSMUSG00000024109	ENSMUSG00000025582	ENSMUSG00000031844	ENSMUSG00000001865	ENSMUSG00000040605	ENSMUSG00000029322	ENSMUSG00000053279	ENSMUSG00000022040	ENSMUSG00000046402	ENSMUSG00000058022	ENSMUSG00000028289	ENSMUSG00000070990	ENSMUSG00000051367	ENSMUSG00000028386	ENSMUSG00000026981	ENSMUSG00000061762	ENSMUSG00000028494	ENSMUSG00000033308	ENSMUSG00000025432	ENSMUSG00000020635	ENSMUSG00000037035	ENSMUSG00000074207	ENSMUSG00000069917	ENSMUSG00000050295	ENSMUSG00000022512	ENSMUSG00000022383	ENSMUSG00000046834	ENSMUSG00000037362	ENSMUSG00000030873	ENSMUSG00000021338	ENSMUSG00000036273	ENSMUSG00000021466	ENSMUSG00000069919
GO:BP	small molecule catabolic process	GO:0044282	0.000123143	3.90959	290	891	35	20346	ENSMUSG00000033427	ENSMUSG00000029695	ENSMUSG00000030268	ENSMUSG00000058022	ENSMUSG00000020407	ENSMUSG00000033308	ENSMUSG00000074207	ENSMUSG00000042684	ENSMUSG00000028893	ENSMUSG00000034744	ENSMUSG00000062908	ENSMUSG00000031700	ENSMUSG00000075296	ENSMUSG00000036880	ENSMUSG00000025059	ENSMUSG00000006378	ENSMUSG00000027227	ENSMUSG00000037940	ENSMUSG00000030630	ENSMUSG00000042289	ENSMUSG00000055301	ENSMUSG00000024525	ENSMUSG00000027984	ENSMUSG00000031387	ENSMUSG00000021226	ENSMUSG00000026003	ENSMUSG00000041440	ENSMUSG00000024747	ENSMUSG00000059447	ENSMUSG00000009585	ENSMUSG00000038894	ENSMUSG00000059316	ENSMUSG00000028937	ENSMUSG00000022546	ENSMUSG00000036091
GO:BP	isopentenyl diphosphate metabolic process	GO:0046490	0.000129111	3.88904	5	738	5	20346	ENSMUSG00000033520	ENSMUSG00000021148	ENSMUSG00000041939	ENSMUSG00000027952	ENSMUSG00000006517
GO:BP	inflammatory response	GO:0006954	0.000133626	3.87411	624	697	49	20346	ENSMUSG00000030107	ENSMUSG00000044748	ENSMUSG00000040605	ENSMUSG00000023913	ENSMUSG00000022040	ENSMUSG00000026981	ENSMUSG00000061762	ENSMUSG00000022383	ENSMUSG00000046834	ENSMUSG00000037362	ENSMUSG00000026535	ENSMUSG00000027347	ENSMUSG00000003051	ENSMUSG00000036273	ENSMUSG00000030793	ENSMUSG00000001123	ENSMUSG00000032238	ENSMUSG00000060477	ENSMUSG00000039208	ENSMUSG00000022037	ENSMUSG00000064246	ENSMUSG00000021025	ENSMUSG00000041939	ENSMUSG00000021457	ENSMUSG00000026983	ENSMUSG00000032193	ENSMUSG00000031558	ENSMUSG00000025473	ENSMUSG00000027298	ENSMUSG00000006445	ENSMUSG00000056071	ENSMUSG00000039145	ENSMUSG00000034855	ENSMUSG00000036931	ENSMUSG00000026166	ENSMUSG00000033174	ENSMUSG00000039942	ENSMUSG00000025779	ENSMUSG00000029380	ENSMUSG00000020592	ENSMUSG00000039384
GO:BP	regulation of catalytic activity	GO:0050790	0.000158215	3.80075	2023	1030	155	20346	ENSMUSG00000071562	ENSMUSG00000010175	ENSMUSG00000071561	ENSMUSG00000042216	ENSMUSG00000024109	ENSMUSG00000022871	ENSMUSG00000049107	ENSMUSG00000079594	ENSMUSG00000044734	ENSMUSG00000034339	ENSMUSG00000028289	ENSMUSG00000030257	ENSMUSG00000046794	ENSMUSG00000026981	ENSMUSG00000029602	ENSMUSG00000034362	ENSMUSG00000020635	ENSMUSG00000052572	ENSMUSG00000026535	ENSMUSG00000057719	ENSMUSG00000027347	ENSMUSG00000029120	ENSMUSG00000036273	ENSMUSG00000026879	ENSMUSG00000030793	ENSMUSG00000078954	ENSMUSG00000022018	ENSMUSG00000054612	ENSMUSG00000000320	ENSMUSG00000063239	ENSMUSG00000052087	ENSMUSG00000022469	ENSMUSG00000059456	ENSMUSG00000028893	ENSMUSG00000011632	ENSMUSG00000004633	ENSMUSG00000037025	ENSMUSG00000024778	ENSMUSG00000062345	ENSMUSG00000001123	ENSMUSG00000061751
GO:BP	regulation of cell motility	GO:2000145	0.000173967	3.75953	873	676	60	20346	ENSMUSG00000002633	ENSMUSG00000025491	ENSMUSG00000010175	ENSMUSG00000035158	ENSMUSG00000021508	ENSMUSG00000049107	ENSMUSG00000044748	ENSMUSG00000023913	ENSMUSG00000032841	ENSMUSG00000058022	ENSMUSG00000023886	ENSMUSG00000016918	ENSMUSG00000025407	ENSMUSG00000026981	ENSMUSG00000061762	ENSMUSG00000037362	ENSMUSG00000057719	ENSMUSG00000021338	ENSMUSG00000030793	ENSMUSG00000022018	ENSMUSG00000000320	ENSMUSG00000022469	ENSMUSG00000018569	ENSMUSG00000059456	ENSMUSG00000028341	ENSMUSG00000024778	ENSMUSG00000001123	ENSMUSG00000032380	ENSMUSG00000096001	ENSMUSG00000026185	ENSMUSG00000020717	ENSMUSG00000036155	ENSMUSG00000026473	ENSMUSG00000069255	ENSMUSG00000020902	ENSMUSG00000022893	ENSMUSG00000031558	ENSMUSG00000032068	ENSMUSG00000025473	ENSMUSG00000006445	ENSMUSG00000039145
GO:BP	localization of cell	GO:0051674	0.000177823	3.75001	1421	676	85	20346	ENSMUSG00000002633	ENSMUSG00000025491	ENSMUSG00000010175	ENSMUSG00000035158	ENSMUSG00000028699	ENSMUSG00000021508	ENSMUSG00000046354	ENSMUSG00000049107	ENSMUSG00000044748	ENSMUSG00000023913	ENSMUSG00000032841	ENSMUSG00000058022	ENSMUSG00000023886	ENSMUSG00000016918	ENSMUSG00000070990	ENSMUSG00000050957	ENSMUSG00000051367	ENSMUSG00000025407	ENSMUSG00000026981	ENSMUSG00000061762	ENSMUSG00000050623	ENSMUSG00000045136	ENSMUSG00000050295	ENSMUSG00000037362	ENSMUSG00000030873	ENSMUSG00000032064	ENSMUSG00000057719	ENSMUSG00000021338	ENSMUSG00000036273	ENSMUSG00000030793	ENSMUSG00000022018	ENSMUSG00000000320	ENSMUSG00000022469	ENSMUSG00000018569	ENSMUSG00000059456	ENSMUSG00000000216	ENSMUSG00000039115	ENSMUSG00000028341	ENSMUSG00000024778	ENSMUSG00000001123	ENSMUSG00000028539
GO:BP	cell motility	GO:0048870	0.000177823	3.75001	1421	676	85	20346	ENSMUSG00000002633	ENSMUSG00000025491	ENSMUSG00000010175	ENSMUSG00000035158	ENSMUSG00000028699	ENSMUSG00000021508	ENSMUSG00000046354	ENSMUSG00000049107	ENSMUSG00000044748	ENSMUSG00000023913	ENSMUSG00000032841	ENSMUSG00000058022	ENSMUSG00000023886	ENSMUSG00000016918	ENSMUSG00000070990	ENSMUSG00000050957	ENSMUSG00000051367	ENSMUSG00000025407	ENSMUSG00000026981	ENSMUSG00000061762	ENSMUSG00000050623	ENSMUSG00000045136	ENSMUSG00000050295	ENSMUSG00000037362	ENSMUSG00000030873	ENSMUSG00000032064	ENSMUSG00000057719	ENSMUSG00000021338	ENSMUSG00000036273	ENSMUSG00000030793	ENSMUSG00000022018	ENSMUSG00000000320	ENSMUSG00000022469	ENSMUSG00000018569	ENSMUSG00000059456	ENSMUSG00000000216	ENSMUSG00000039115	ENSMUSG00000028341	ENSMUSG00000024778	ENSMUSG00000001123	ENSMUSG00000028539
GO:BP	isoprenoid metabolic process	GO:0006720	0.000237545	3.62425	89	738	16	20346	ENSMUSG00000004885	ENSMUSG00000053279	ENSMUSG00000046402	ENSMUSG00000032454	ENSMUSG00000074207	ENSMUSG00000033520	ENSMUSG00000021148	ENSMUSG00000029134	ENSMUSG00000030747	ENSMUSG00000041939	ENSMUSG00000056666	ENSMUSG00000059743	ENSMUSG00000055301	ENSMUSG00000028236	ENSMUSG00000027952	ENSMUSG00000006517
GO:BP	positive regulation of locomotion	GO:0040017	0.000241754	3.61663	558	676	44	20346	ENSMUSG00000002633	ENSMUSG00000010175	ENSMUSG00000021508	ENSMUSG00000049107	ENSMUSG00000044748	ENSMUSG00000023913	ENSMUSG00000023886	ENSMUSG00000025407	ENSMUSG00000061762	ENSMUSG00000045136	ENSMUSG00000057719	ENSMUSG00000021338	ENSMUSG00000030793	ENSMUSG00000000320	ENSMUSG00000022469	ENSMUSG00000018569	ENSMUSG00000059456	ENSMUSG00000028341	ENSMUSG00000001123	ENSMUSG00000028539	ENSMUSG00000032380	ENSMUSG00000026185	ENSMUSG00000020717	ENSMUSG00000036155	ENSMUSG00000020902	ENSMUSG00000022893	ENSMUSG00000031558	ENSMUSG00000032068	ENSMUSG00000025473	ENSMUSG00000039145	ENSMUSG00000034855	ENSMUSG00000026166	ENSMUSG00000045394	ENSMUSG00000051517	ENSMUSG00000039942	ENSMUSG00000024486	ENSMUSG00000021701	ENSMUSG00000008601	ENSMUSG00000024659	ENSMUSG00000004771	ENSMUSG00000026383
GO:BP	regulation of locomotion	GO:0040012	0.000283254	3.54782	949	676	63	20346	ENSMUSG00000002633	ENSMUSG00000025491	ENSMUSG00000010175	ENSMUSG00000035158	ENSMUSG00000021508	ENSMUSG00000049107	ENSMUSG00000044748	ENSMUSG00000023913	ENSMUSG00000032841	ENSMUSG00000058022	ENSMUSG00000023886	ENSMUSG00000016918	ENSMUSG00000025407	ENSMUSG00000026981	ENSMUSG00000061762	ENSMUSG00000045136	ENSMUSG00000037362	ENSMUSG00000057719	ENSMUSG00000021338	ENSMUSG00000036273	ENSMUSG00000030793	ENSMUSG00000022018	ENSMUSG00000000320	ENSMUSG00000022469	ENSMUSG00000018569	ENSMUSG00000059456	ENSMUSG00000028341	ENSMUSG00000024778	ENSMUSG00000001123	ENSMUSG00000028539	ENSMUSG00000032380	ENSMUSG00000096001	ENSMUSG00000026185	ENSMUSG00000020717	ENSMUSG00000036155	ENSMUSG00000026473	ENSMUSG00000069255	ENSMUSG00000020902	ENSMUSG00000022893	ENSMUSG00000031558	ENSMUSG00000032068
GO:BP	negative regulation of catalytic activity	GO:0043086	0.000285114	3.54498	757	1021	72	20346	ENSMUSG00000071562	ENSMUSG00000071561	ENSMUSG00000022871	ENSMUSG00000079594	ENSMUSG00000044734	ENSMUSG00000034339	ENSMUSG00000034362	ENSMUSG00000020635	ENSMUSG00000052572	ENSMUSG00000026535	ENSMUSG00000057719	ENSMUSG00000036273	ENSMUSG00000030793	ENSMUSG00000052087	ENSMUSG00000011632	ENSMUSG00000037025	ENSMUSG00000062345	ENSMUSG00000054905	ENSMUSG00000032715	ENSMUSG00000044594	ENSMUSG00000059956	ENSMUSG00000002289	ENSMUSG00000020717	ENSMUSG00000073802	ENSMUSG00000036155	ENSMUSG00000027315	ENSMUSG00000005054	ENSMUSG00000069255	ENSMUSG00000046223	ENSMUSG00000053886	ENSMUSG00000031558	ENSMUSG00000037211	ENSMUSG00000081683	ENSMUSG00000001249	ENSMUSG00000027499	ENSMUSG00000035441	ENSMUSG00000004952	ENSMUSG00000034926	ENSMUSG00000025555	ENSMUSG00000039384	ENSMUSG00000035863
GO:BP	regulation of cell migration	GO:0030334	0.000325896	3.48692	826	676	57	20346	ENSMUSG00000002633	ENSMUSG00000025491	ENSMUSG00000010175	ENSMUSG00000035158	ENSMUSG00000021508	ENSMUSG00000049107	ENSMUSG00000023913	ENSMUSG00000032841	ENSMUSG00000058022	ENSMUSG00000023886	ENSMUSG00000016918	ENSMUSG00000025407	ENSMUSG00000026981	ENSMUSG00000061762	ENSMUSG00000037362	ENSMUSG00000057719	ENSMUSG00000021338	ENSMUSG00000030793	ENSMUSG00000022018	ENSMUSG00000000320	ENSMUSG00000022469	ENSMUSG00000059456	ENSMUSG00000028341	ENSMUSG00000024778	ENSMUSG00000001123	ENSMUSG00000032380	ENSMUSG00000096001	ENSMUSG00000026185	ENSMUSG00000020717	ENSMUSG00000036155	ENSMUSG00000026473	ENSMUSG00000069255	ENSMUSG00000020902	ENSMUSG00000022893	ENSMUSG00000031558	ENSMUSG00000032068	ENSMUSG00000025473	ENSMUSG00000006445	ENSMUSG00000039145	ENSMUSG00000034855	ENSMUSG00000026166
GO:BP	regulation of hydrolase activity	GO:0051336	0.000325931	3.48687	1137	555	62	20346	ENSMUSG00000071562	ENSMUSG00000071561	ENSMUSG00000042216	ENSMUSG00000022871	ENSMUSG00000049107	ENSMUSG00000079594	ENSMUSG00000044734	ENSMUSG00000034339	ENSMUSG00000028289	ENSMUSG00000030257	ENSMUSG00000046794	ENSMUSG00000029602	ENSMUSG00000034362	ENSMUSG00000020635	ENSMUSG00000052572	ENSMUSG00000026535	ENSMUSG00000057719	ENSMUSG00000027347	ENSMUSG00000029120	ENSMUSG00000036273	ENSMUSG00000026879	ENSMUSG00000030793	ENSMUSG00000078954	ENSMUSG00000054612	ENSMUSG00000000320	ENSMUSG00000052087	ENSMUSG00000022469	ENSMUSG00000059456	ENSMUSG00000004633	ENSMUSG00000024778	ENSMUSG00000062345	ENSMUSG00000061751	ENSMUSG00000054905	ENSMUSG00000044594	ENSMUSG00000059956	ENSMUSG00000002289	ENSMUSG00000020717	ENSMUSG00000036155	ENSMUSG00000027315	ENSMUSG00000031214	ENSMUSG00000057315
GO:BP	anatomical structure morphogenesis	GO:0009653	0.000356949	3.44739	2466	968	171	20346	ENSMUSG00000002633	ENSMUSG00000025491	ENSMUSG00000010175	ENSMUSG00000036466	ENSMUSG00000025876	ENSMUSG00000004885	ENSMUSG00000029671	ENSMUSG00000020140	ENSMUSG00000024109	ENSMUSG00000039683	ENSMUSG00000025582	ENSMUSG00000017491	ENSMUSG00000049107	ENSMUSG00000027186	ENSMUSG00000053279	ENSMUSG00000058022	ENSMUSG00000023886	ENSMUSG00000043924	ENSMUSG00000028289	ENSMUSG00000016918	ENSMUSG00000070990	ENSMUSG00000051367	ENSMUSG00000025407	ENSMUSG00000022330	ENSMUSG00000026981	ENSMUSG00000029602	ENSMUSG00000029378	ENSMUSG00000048138	ENSMUSG00000045136	ENSMUSG00000021604	ENSMUSG00000050295	ENSMUSG00000021281	ENSMUSG00000044041	ENSMUSG00000022383	ENSMUSG00000037362	ENSMUSG00000030873	ENSMUSG00000032064	ENSMUSG00000003051	ENSMUSG00000021338	ENSMUSG00000036273	ENSMUSG00000021466
GO:BP	cell migration	GO:0016477	0.000430419	3.36611	1291	676	78	20346	ENSMUSG00000002633	ENSMUSG00000025491	ENSMUSG00000010175	ENSMUSG00000035158	ENSMUSG00000028699	ENSMUSG00000021508	ENSMUSG00000046354	ENSMUSG00000049107	ENSMUSG00000023913	ENSMUSG00000032841	ENSMUSG00000058022	ENSMUSG00000023886	ENSMUSG00000016918	ENSMUSG00000070990	ENSMUSG00000051367	ENSMUSG00000025407	ENSMUSG00000026981	ENSMUSG00000061762	ENSMUSG00000045136	ENSMUSG00000050295	ENSMUSG00000037362	ENSMUSG00000030873	ENSMUSG00000032064	ENSMUSG00000057719	ENSMUSG00000021338	ENSMUSG00000036273	ENSMUSG00000030793	ENSMUSG00000022018	ENSMUSG00000000320	ENSMUSG00000022469	ENSMUSG00000059456	ENSMUSG00000000216	ENSMUSG00000039115	ENSMUSG00000028341	ENSMUSG00000024778	ENSMUSG00000001123	ENSMUSG00000028539	ENSMUSG00000035000	ENSMUSG00000032380	ENSMUSG00000096001	ENSMUSG00000026185
GO:BP	regulation of lipid metabolic process	GO:0019216	0.000506679	3.29527	348	447	25	20346	ENSMUSG00000010175	ENSMUSG00000024526	ENSMUSG00000022040	ENSMUSG00000027761	ENSMUSG00000033520	ENSMUSG00000022383	ENSMUSG00000021148	ENSMUSG00000059456	ENSMUSG00000037025	ENSMUSG00000028341	ENSMUSG00000030747	ENSMUSG00000027533	ENSMUSG00000032238	ENSMUSG00000032715	ENSMUSG00000045502	ENSMUSG00000002289	ENSMUSG00000047443	ENSMUSG00000003555	ENSMUSG00000024378	ENSMUSG00000030792	ENSMUSG00000058454	ENSMUSG00000045294	ENSMUSG00000025059	ENSMUSG00000032193	ENSMUSG00000031483
GO:BP	alcohol biosynthetic process	GO:0046165	0.000579853	3.23668	118	743	18	20346	ENSMUSG00000026170	ENSMUSG00000033520	ENSMUSG00000021148	ENSMUSG00000059456	ENSMUSG00000058454	ENSMUSG00000045294	ENSMUSG00000041939	ENSMUSG00000010660	ENSMUSG00000031483	ENSMUSG00000003752	ENSMUSG00000059743	ENSMUSG00000034926	ENSMUSG00000024525	ENSMUSG00000027952	ENSMUSG00000025198	ENSMUSG00000001467	ENSMUSG00000006517	ENSMUSG00000028048
GO:BP	negative regulation of defense response	GO:0031348	0.000653886	3.1845	205	832	26	20346	ENSMUSG00000022383	ENSMUSG00000046834	ENSMUSG00000037362	ENSMUSG00000026535	ENSMUSG00000030793	ENSMUSG00000027639	ENSMUSG00000001123	ENSMUSG00000032238	ENSMUSG00000044594	ENSMUSG00000039208	ENSMUSG00000041939	ENSMUSG00000032193	ENSMUSG00000031558	ENSMUSG00000027298	ENSMUSG00000039942	ENSMUSG00000038576	ENSMUSG00000039384	ENSMUSG00000001348	ENSMUSG00000030157	ENSMUSG00000032420	ENSMUSG00000044244	ENSMUSG00000037321	ENSMUSG00000032109	ENSMUSG00000067377	ENSMUSG00000067212	ENSMUSG00000074272
GO:BP	long-chain fatty acid metabolic process	GO:0001676	0.000698968	3.15554	63	872	14	20346	ENSMUSG00000022040	ENSMUSG00000058022	ENSMUSG00000000320	ENSMUSG00000018796	ENSMUSG00000027710	ENSMUSG00000039206	ENSMUSG00000033174	ENSMUSG00000032281	ENSMUSG00000072949	ENSMUSG00000021226	ENSMUSG00000026003	ENSMUSG00000059316	ENSMUSG00000031278	ENSMUSG00000028937
GO:BP	regulation of cholesterol metabolic process	GO:0090181	0.000736464	3.13285	30	675	9	20346	ENSMUSG00000022040	ENSMUSG00000033520	ENSMUSG00000021148	ENSMUSG00000030747	ENSMUSG00000058454	ENSMUSG00000032193	ENSMUSG00000031483	ENSMUSG00000059743	ENSMUSG00000025198
GO:BP	organic hydroxy compound biosynthetic process	GO:1901617	0.00074675	3.12682	201	743	24	20346	ENSMUSG00000010175	ENSMUSG00000026170	ENSMUSG00000033520	ENSMUSG00000000320	ENSMUSG00000021148	ENSMUSG00000059456	ENSMUSG00000024378	ENSMUSG00000030792	ENSMUSG00000058454	ENSMUSG00000045294	ENSMUSG00000041939	ENSMUSG00000010660	ENSMUSG00000031483	ENSMUSG00000022351	ENSMUSG00000031604	ENSMUSG00000003752	ENSMUSG00000059743	ENSMUSG00000034926	ENSMUSG00000024525	ENSMUSG00000027952	ENSMUSG00000025198	ENSMUSG00000001467	ENSMUSG00000006517	ENSMUSG00000028048
GO:BP	regulation of cell differentiation	GO:0045595	0.00079713	3.09847	1834	690	102	20346	ENSMUSG00000002633	ENSMUSG00000055027	ENSMUSG00000025491	ENSMUSG00000010175	ENSMUSG00000035158	ENSMUSG00000028681	ENSMUSG00000004885	ENSMUSG00000020218	ENSMUSG00000039683	ENSMUSG00000021508	ENSMUSG00000017491	ENSMUSG00000049107	ENSMUSG00000027186	ENSMUSG00000046402	ENSMUSG00000027500	ENSMUSG00000028289	ENSMUSG00000051367	ENSMUSG00000028386	ENSMUSG00000025407	ENSMUSG00000047143	ENSMUSG00000025432	ENSMUSG00000029602	ENSMUSG00000020635	ENSMUSG00000029378	ENSMUSG00000045136	ENSMUSG00000050295	ENSMUSG00000022383	ENSMUSG00000037362	ENSMUSG00000032064	ENSMUSG00000027347	ENSMUSG00000021338	ENSMUSG00000036273	ENSMUSG00000021466	ENSMUSG00000026304	ENSMUSG00000022018	ENSMUSG00000052087	ENSMUSG00000059456	ENSMUSG00000037025	ENSMUSG00000024778	ENSMUSG00000001123	ENSMUSG00000061751
GO:BP	positive regulation of cellular process	GO:0048522	0.00083869	3.0764	4921	1003	310	20346	ENSMUSG00000026058	ENSMUSG00000002633	ENSMUSG00000055027	ENSMUSG00000025491	ENSMUSG00000010175	ENSMUSG00000035158	ENSMUSG00000027674	ENSMUSG00000028699	ENSMUSG00000028681	ENSMUSG00000042216	ENSMUSG00000004885	ENSMUSG00000029671	ENSMUSG00000020140	ENSMUSG00000024109	ENSMUSG00000020218	ENSMUSG00000021508	ENSMUSG00000017491	ENSMUSG00000049107	ENSMUSG00000027186	ENSMUSG00000044748	ENSMUSG00000029322	ENSMUSG00000053279	ENSMUSG00000023913	ENSMUSG00000032841	ENSMUSG00000058022	ENSMUSG00000027500	ENSMUSG00000023886	ENSMUSG00000027761	ENSMUSG00000043924	ENSMUSG00000028289	ENSMUSG00000016918	ENSMUSG00000070990	ENSMUSG00000051367	ENSMUSG00000035305	ENSMUSG00000025407	ENSMUSG00000047143	ENSMUSG00000029335	ENSMUSG00000037161	ENSMUSG00000022330	ENSMUSG00000026981	ENSMUSG00000061762
GO:BP	positive regulation of developmental process	GO:0051094	0.000859169	3.06592	1444	690	85	20346	ENSMUSG00000002633	ENSMUSG00000055027	ENSMUSG00000025491	ENSMUSG00000010175	ENSMUSG00000028681	ENSMUSG00000004885	ENSMUSG00000024109	ENSMUSG00000020218	ENSMUSG00000017491	ENSMUSG00000049107	ENSMUSG00000027500	ENSMUSG00000023886	ENSMUSG00000043924	ENSMUSG00000051367	ENSMUSG00000025407	ENSMUSG00000047143	ENSMUSG00000022330	ENSMUSG00000025432	ENSMUSG00000029602	ENSMUSG00000020635	ENSMUSG00000048138	ENSMUSG00000045136	ENSMUSG00000050295	ENSMUSG00000032064	ENSMUSG00000027347	ENSMUSG00000021338	ENSMUSG00000021466	ENSMUSG00000045871	ENSMUSG00000022018	ENSMUSG00000000320	ENSMUSG00000052087	ENSMUSG00000022469	ENSMUSG00000059456	ENSMUSG00000037025	ENSMUSG00000028184	ENSMUSG00000060780	ENSMUSG00000001123	ENSMUSG00000061751	ENSMUSG00000048482	ENSMUSG00000030790	ENSMUSG00000018899
GO:BP	positive regulation of cell motility	GO:2000147	0.00093658	3.02846	527	676	41	20346	ENSMUSG00000002633	ENSMUSG00000010175	ENSMUSG00000021508	ENSMUSG00000049107	ENSMUSG00000044748	ENSMUSG00000023913	ENSMUSG00000023886	ENSMUSG00000025407	ENSMUSG00000061762	ENSMUSG00000057719	ENSMUSG00000021338	ENSMUSG00000030793	ENSMUSG00000000320	ENSMUSG00000022469	ENSMUSG00000018569	ENSMUSG00000059456	ENSMUSG00000028341	ENSMUSG00000001123	ENSMUSG00000032380	ENSMUSG00000026185	ENSMUSG00000020717	ENSMUSG00000036155	ENSMUSG00000020902	ENSMUSG00000022893	ENSMUSG00000032068	ENSMUSG00000025473	ENSMUSG00000039145	ENSMUSG00000034855	ENSMUSG00000026166	ENSMUSG00000045394	ENSMUSG00000051517	ENSMUSG00000039942	ENSMUSG00000024486	ENSMUSG00000021701	ENSMUSG00000008601	ENSMUSG00000024659	ENSMUSG00000004771	ENSMUSG00000026383	ENSMUSG00000031955	ENSMUSG00000041845	ENSMUSG00000004951
GO:BP	regulation of hormone levels	GO:0010817	0.000960246	3.01762	519	467	32	20346	ENSMUSG00000002633	ENSMUSG00000027674	ENSMUSG00000026170	ENSMUSG00000004885	ENSMUSG00000031844	ENSMUSG00000001865	ENSMUSG00000053279	ENSMUSG00000046402	ENSMUSG00000070990	ENSMUSG00000026981	ENSMUSG00000061762	ENSMUSG00000020635	ENSMUSG00000037035	ENSMUSG00000074207	ENSMUSG00000037362	ENSMUSG00000029134	ENSMUSG00000037025	ENSMUSG00000037852	ENSMUSG00000030747	ENSMUSG00000061751	ENSMUSG00000030790	ENSMUSG00000045502	ENSMUSG00000042207	ENSMUSG00000003555	ENSMUSG00000031488	ENSMUSG00000030792	ENSMUSG00000026473	ENSMUSG00000039007	ENSMUSG00000029236	ENSMUSG00000021591	ENSMUSG00000001249	ENSMUSG00000056666
GO:BP	positive regulation of cellular component movement	GO:0051272	0.000961117	3.01722	547	676	42	20346	ENSMUSG00000002633	ENSMUSG00000010175	ENSMUSG00000021508	ENSMUSG00000049107	ENSMUSG00000044748	ENSMUSG00000023913	ENSMUSG00000023886	ENSMUSG00000025407	ENSMUSG00000061762	ENSMUSG00000045136	ENSMUSG00000057719	ENSMUSG00000021338	ENSMUSG00000030793	ENSMUSG00000000320	ENSMUSG00000022469	ENSMUSG00000018569	ENSMUSG00000059456	ENSMUSG00000028341	ENSMUSG00000001123	ENSMUSG00000032380	ENSMUSG00000026185	ENSMUSG00000020717	ENSMUSG00000036155	ENSMUSG00000020902	ENSMUSG00000022893	ENSMUSG00000032068	ENSMUSG00000025473	ENSMUSG00000039145	ENSMUSG00000034855	ENSMUSG00000026166	ENSMUSG00000045394	ENSMUSG00000051517	ENSMUSG00000039942	ENSMUSG00000024486	ENSMUSG00000021701	ENSMUSG00000008601	ENSMUSG00000024659	ENSMUSG00000004771	ENSMUSG00000026383	ENSMUSG00000031955	ENSMUSG00000041845
GO:BP	regulation of cellular component movement	GO:0051270	0.000995209	3.00209	962	676	62	20346	ENSMUSG00000002633	ENSMUSG00000025491	ENSMUSG00000010175	ENSMUSG00000035158	ENSMUSG00000021508	ENSMUSG00000049107	ENSMUSG00000044748	ENSMUSG00000023913	ENSMUSG00000032841	ENSMUSG00000058022	ENSMUSG00000023886	ENSMUSG00000016918	ENSMUSG00000025407	ENSMUSG00000026981	ENSMUSG00000061762	ENSMUSG00000045136	ENSMUSG00000037362	ENSMUSG00000057719	ENSMUSG00000021338	ENSMUSG00000030793	ENSMUSG00000022018	ENSMUSG00000000320	ENSMUSG00000022469	ENSMUSG00000018569	ENSMUSG00000059456	ENSMUSG00000028341	ENSMUSG00000024331	ENSMUSG00000024778	ENSMUSG00000001123	ENSMUSG00000032380	ENSMUSG00000096001	ENSMUSG00000026185	ENSMUSG00000020717	ENSMUSG00000036155	ENSMUSG00000026473	ENSMUSG00000069255	ENSMUSG00000020902	ENSMUSG00000022893	ENSMUSG00000031558	ENSMUSG00000032068	ENSMUSG00000025473
GO:BP	phosphate-containing compound metabolic process	GO:0006796	0.00104936	2.97908	2902	1011	200	20346	ENSMUSG00000029695	ENSMUSG00000010175	ENSMUSG00000029671	ENSMUSG00000024109	ENSMUSG00000049107	ENSMUSG00000023913	ENSMUSG00000032841	ENSMUSG00000022040	ENSMUSG00000022598	ENSMUSG00000058022	ENSMUSG00000028289	ENSMUSG00000035305	ENSMUSG00000070644	ENSMUSG00000021456	ENSMUSG00000046794	ENSMUSG00000020407	ENSMUSG00000026981	ENSMUSG00000030303	ENSMUSG00000023960	ENSMUSG00000020635	ENSMUSG00000029378	ENSMUSG00000029154	ENSMUSG00000028749	ENSMUSG00000033520	ENSMUSG00000022383	ENSMUSG00000042249	ENSMUSG00000052572	ENSMUSG00000032064	ENSMUSG00000057719	ENSMUSG00000027347	ENSMUSG00000029120	ENSMUSG00000036273	ENSMUSG00000030793	ENSMUSG00000027639	ENSMUSG00000022018	ENSMUSG00000021148	ENSMUSG00000063239	ENSMUSG00000052087	ENSMUSG00000022469	ENSMUSG00000059456	ENSMUSG00000028893
GO:BP	tube development	GO:0035295	0.00106545	2.97247	1071	832	78	20346	ENSMUSG00000002633	ENSMUSG00000010175	ENSMUSG00000020140	ENSMUSG00000024109	ENSMUSG00000017491	ENSMUSG00000058022	ENSMUSG00000023886	ENSMUSG00000028289	ENSMUSG00000016918	ENSMUSG00000070990	ENSMUSG00000051367	ENSMUSG00000025407	ENSMUSG00000029378	ENSMUSG00000050295	ENSMUSG00000021281	ENSMUSG00000037362	ENSMUSG00000021466	ENSMUSG00000022018	ENSMUSG00000000320	ENSMUSG00000022469	ENSMUSG00000059456	ENSMUSG00000037025	ENSMUSG00000028341	ENSMUSG00000026185	ENSMUSG00000048482	ENSMUSG00000032238	ENSMUSG00000030790	ENSMUSG00000046352	ENSMUSG00000042207	ENSMUSG00000002289	ENSMUSG00000020717	ENSMUSG00000035273	ENSMUSG00000028019	ENSMUSG00000027315	ENSMUSG00000064246	ENSMUSG00000057315	ENSMUSG00000058454	ENSMUSG00000026473	ENSMUSG00000020902	ENSMUSG00000021457	ENSMUSG00000022893
GO:BP	phosphorus metabolic process	GO:0006793	0.00108714	2.96371	2921	1011	201	20346	ENSMUSG00000029695	ENSMUSG00000010175	ENSMUSG00000029671	ENSMUSG00000024109	ENSMUSG00000049107	ENSMUSG00000023913	ENSMUSG00000032841	ENSMUSG00000022040	ENSMUSG00000022598	ENSMUSG00000058022	ENSMUSG00000028289	ENSMUSG00000035305	ENSMUSG00000070644	ENSMUSG00000021456	ENSMUSG00000046794	ENSMUSG00000020407	ENSMUSG00000026981	ENSMUSG00000030303	ENSMUSG00000023960	ENSMUSG00000020635	ENSMUSG00000029378	ENSMUSG00000029154	ENSMUSG00000028749	ENSMUSG00000033520	ENSMUSG00000022383	ENSMUSG00000042249	ENSMUSG00000052572	ENSMUSG00000032064	ENSMUSG00000057719	ENSMUSG00000027347	ENSMUSG00000029120	ENSMUSG00000036273	ENSMUSG00000030793	ENSMUSG00000027639	ENSMUSG00000022018	ENSMUSG00000021148	ENSMUSG00000063239	ENSMUSG00000052087	ENSMUSG00000022469	ENSMUSG00000059456	ENSMUSG00000028893
GO:BP	negative regulation of innate immune response	GO:0045824	0.00114595	2.94083	53	932	13	20346	ENSMUSG00000026535	ENSMUSG00000027639	ENSMUSG00000001123	ENSMUSG00000044594	ENSMUSG00000027298	ENSMUSG00000038576	ENSMUSG00000039384	ENSMUSG00000030157	ENSMUSG00000037321	ENSMUSG00000032109	ENSMUSG00000067212	ENSMUSG00000074272	ENSMUSG00000024339
GO:BP	cellular catabolic process	GO:0044248	0.00152494	2.81675	1625	907	114	20346	ENSMUSG00000033427	ENSMUSG00000002633	ENSMUSG00000029695	ENSMUSG00000024526	ENSMUSG00000030268	ENSMUSG00000030107	ENSMUSG00000032841	ENSMUSG00000022040	ENSMUSG00000058022	ENSMUSG00000027761	ENSMUSG00000028393	ENSMUSG00000046794	ENSMUSG00000020407	ENSMUSG00000033308	ENSMUSG00000023960	ENSMUSG00000074207	ENSMUSG00000055652	ENSMUSG00000042684	ENSMUSG00000057719	ENSMUSG00000027890	ENSMUSG00000036273	ENSMUSG00000030793	ENSMUSG00000027639	ENSMUSG00000059456	ENSMUSG00000028893	ENSMUSG00000037852	ENSMUSG00000046971	ENSMUSG00000034744	ENSMUSG00000028713	ENSMUSG00000062908	ENSMUSG00000074093	ENSMUSG00000032715	ENSMUSG00000022996	ENSMUSG00000031700	ENSMUSG00000075296	ENSMUSG00000035273	ENSMUSG00000020905	ENSMUSG00000038068	ENSMUSG00000022037	ENSMUSG00000031214	ENSMUSG00000032648
GO:BP	regulation of response to stimulus	GO:0048583	0.00156771	2.80473	3660	1008	241	20346	ENSMUSG00000026058	ENSMUSG00000002633	ENSMUSG00000027674	ENSMUSG00000024526	ENSMUSG00000030107	ENSMUSG00000030666	ENSMUSG00000004885	ENSMUSG00000026875	ENSMUSG00000029671	ENSMUSG00000020140	ENSMUSG00000024109	ENSMUSG00000020218	ENSMUSG00000021508	ENSMUSG00000025582	ENSMUSG00000049107	ENSMUSG00000039364	ENSMUSG00000023913	ENSMUSG00000032841	ENSMUSG00000022598	ENSMUSG00000058022	ENSMUSG00000023886	ENSMUSG00000028289	ENSMUSG00000016918	ENSMUSG00000041012	ENSMUSG00000050957	ENSMUSG00000035305	ENSMUSG00000025407	ENSMUSG00000029335	ENSMUSG00000042988	ENSMUSG00000026981	ENSMUSG00000061762	ENSMUSG00000029602	ENSMUSG00000020635	ENSMUSG00000037035	ENSMUSG00000029378	ENSMUSG00000045136	ENSMUSG00000022383	ENSMUSG00000046834	ENSMUSG00000037362	ENSMUSG00000042249	ENSMUSG00000026535
GO:BP	regulation of localization	GO:0032879	0.00161292	2.79239	2601	953	173	20346	ENSMUSG00000002633	ENSMUSG00000025491	ENSMUSG00000010175	ENSMUSG00000035158	ENSMUSG00000027674	ENSMUSG00000028699	ENSMUSG00000024526	ENSMUSG00000024109	ENSMUSG00000021508	ENSMUSG00000049107	ENSMUSG00000026961	ENSMUSG00000004988	ENSMUSG00000044748	ENSMUSG00000023913	ENSMUSG00000032841	ENSMUSG00000058022	ENSMUSG00000023886	ENSMUSG00000016918	ENSMUSG00000051367	ENSMUSG00000025407	ENSMUSG00000026981	ENSMUSG00000061762	ENSMUSG00000020635	ENSMUSG00000037035	ENSMUSG00000045136	ENSMUSG00000022383	ENSMUSG00000037362	ENSMUSG00000030873	ENSMUSG00000057719	ENSMUSG00000027347	ENSMUSG00000021338	ENSMUSG00000036273	ENSMUSG00000021466	ENSMUSG00000026879	ENSMUSG00000030793	ENSMUSG00000042686	ENSMUSG00000030287	ENSMUSG00000032202	ENSMUSG00000022018	ENSMUSG00000000320	ENSMUSG00000022469
GO:BP	anatomical structure formation involved in morphogenesis	GO:0048646	0.00173605	2.76044	1087	1002	90	20346	ENSMUSG00000002633	ENSMUSG00000025491	ENSMUSG00000010175	ENSMUSG00000036466	ENSMUSG00000024109	ENSMUSG00000039683	ENSMUSG00000027186	ENSMUSG00000053279	ENSMUSG00000058022	ENSMUSG00000023886	ENSMUSG00000043924	ENSMUSG00000016918	ENSMUSG00000051367	ENSMUSG00000048138	ENSMUSG00000050295	ENSMUSG00000021281	ENSMUSG00000022383	ENSMUSG00000037362	ENSMUSG00000021466	ENSMUSG00000022018	ENSMUSG00000022469	ENSMUSG00000059456	ENSMUSG00000025993	ENSMUSG00000037025	ENSMUSG00000028341	ENSMUSG00000037868	ENSMUSG00000032238	ENSMUSG00000030790	ENSMUSG00000049382	ENSMUSG00000022996	ENSMUSG00000002289	ENSMUSG00000020717	ENSMUSG00000035273	ENSMUSG00000020911	ENSMUSG00000027315	ENSMUSG00000064246	ENSMUSG00000031214	ENSMUSG00000057315	ENSMUSG00000026473	ENSMUSG00000021457	ENSMUSG00000022893
GO:BP	cellular response to metal ion	GO:0071248	0.00212101	2.67346	169	245	12	20346	ENSMUSG00000002633	ENSMUSG00000024109	ENSMUSG00000025582	ENSMUSG00000028393	ENSMUSG00000029602	ENSMUSG00000022512	ENSMUSG00000052572	ENSMUSG00000036273	ENSMUSG00000026879	ENSMUSG00000025993	ENSMUSG00000032348	ENSMUSG00000024778
GO:BP	regulation of proteolysis	GO:0030162	0.00213915	2.66976	694	473	38	20346	ENSMUSG00000002633	ENSMUSG00000071562	ENSMUSG00000071561	ENSMUSG00000022871	ENSMUSG00000079594	ENSMUSG00000044734	ENSMUSG00000034339	ENSMUSG00000028289	ENSMUSG00000028393	ENSMUSG00000034362	ENSMUSG00000026535	ENSMUSG00000057719	ENSMUSG00000036273	ENSMUSG00000026879	ENSMUSG00000030793	ENSMUSG00000054612	ENSMUSG00000000320	ENSMUSG00000059456	ENSMUSG00000024778	ENSMUSG00000062345	ENSMUSG00000054905	ENSMUSG00000074093	ENSMUSG00000032715	ENSMUSG00000028894	ENSMUSG00000022996	ENSMUSG00000044594	ENSMUSG00000059956	ENSMUSG00000027315	ENSMUSG00000022037	ENSMUSG00000031214	ENSMUSG00000005054	ENSMUSG00000046223	ENSMUSG00000041135	ENSMUSG00000071369	ENSMUSG00000025473	ENSMUSG00000001249	ENSMUSG00000024521	ENSMUSG00000056071
GO:BP	negative regulation of response to stimulus	GO:0048585	0.00285651	2.54416	1499	1006	115	20346	ENSMUSG00000002633	ENSMUSG00000024526	ENSMUSG00000024109	ENSMUSG00000020218	ENSMUSG00000032841	ENSMUSG00000022598	ENSMUSG00000058022	ENSMUSG00000016918	ENSMUSG00000025407	ENSMUSG00000042988	ENSMUSG00000026981	ENSMUSG00000029602	ENSMUSG00000020635	ENSMUSG00000022383	ENSMUSG00000046834	ENSMUSG00000037362	ENSMUSG00000042249	ENSMUSG00000026535	ENSMUSG00000057719	ENSMUSG00000036273	ENSMUSG00000021466	ENSMUSG00000030793	ENSMUSG00000027639	ENSMUSG00000000320	ENSMUSG00000052087	ENSMUSG00000028893	ENSMUSG00000037025	ENSMUSG00000028341	ENSMUSG00000013766	ENSMUSG00000040856	ENSMUSG00000001123	ENSMUSG00000020847	ENSMUSG00000026185	ENSMUSG00000032238	ENSMUSG00000030790	ENSMUSG00000074093	ENSMUSG00000018899	ENSMUSG00000044594	ENSMUSG00000030792	ENSMUSG00000039208	ENSMUSG00000022037
GO:BP	isoprenoid biosynthetic process	GO:0008299	0.00285708	2.54408	32	738	9	20346	ENSMUSG00000004885	ENSMUSG00000053279	ENSMUSG00000046402	ENSMUSG00000033520	ENSMUSG00000021148	ENSMUSG00000041939	ENSMUSG00000059743	ENSMUSG00000027952	ENSMUSG00000006517
GO:BP	response to organic cyclic compound	GO:0014070	0.00290889	2.53627	947	756	65	20346	ENSMUSG00000024526	ENSMUSG00000030107	ENSMUSG00000039683	ENSMUSG00000017491	ENSMUSG00000044748	ENSMUSG00000058022	ENSMUSG00000051367	ENSMUSG00000028393	ENSMUSG00000037161	ENSMUSG00000026981	ENSMUSG00000061762	ENSMUSG00000028494	ENSMUSG00000033308	ENSMUSG00000020635	ENSMUSG00000037035	ENSMUSG00000029378	ENSMUSG00000074207	ENSMUSG00000022512	ENSMUSG00000022383	ENSMUSG00000036273	ENSMUSG00000021466	ENSMUSG00000026879	ENSMUSG00000030287	ENSMUSG00000054612	ENSMUSG00000022469	ENSMUSG00000059456	ENSMUSG00000028341	ENSMUSG00000024778	ENSMUSG00000046971	ENSMUSG00000026185	ENSMUSG00000048482	ENSMUSG00000032238	ENSMUSG00000046352	ENSMUSG00000022996	ENSMUSG00000024912	ENSMUSG00000022037	ENSMUSG00000021025	ENSMUSG00000045294	ENSMUSG00000032648	ENSMUSG00000041135	ENSMUSG00000031558
GO:BP	positive regulation of multicellular organismal process	GO:0051240	0.00310746	2.5076	1799	697	99	20346	ENSMUSG00000002633	ENSMUSG00000025491	ENSMUSG00000010175	ENSMUSG00000027674	ENSMUSG00000004885	ENSMUSG00000024109	ENSMUSG00000017491	ENSMUSG00000049107	ENSMUSG00000029322	ENSMUSG00000027500	ENSMUSG00000023886	ENSMUSG00000043924	ENSMUSG00000016918	ENSMUSG00000051367	ENSMUSG00000025407	ENSMUSG00000047143	ENSMUSG00000022330	ENSMUSG00000061762	ENSMUSG00000025432	ENSMUSG00000029602	ENSMUSG00000020635	ENSMUSG00000037035	ENSMUSG00000048138	ENSMUSG00000045136	ENSMUSG00000050295	ENSMUSG00000032064	ENSMUSG00000027347	ENSMUSG00000036273	ENSMUSG00000045871	ENSMUSG00000030793	ENSMUSG00000022018	ENSMUSG00000000320	ENSMUSG00000052087	ENSMUSG00000022469	ENSMUSG00000059456	ENSMUSG00000028607	ENSMUSG00000037025	ENSMUSG00000028341	ENSMUSG00000028184	ENSMUSG00000060780	ENSMUSG00000001123
GO:BP	proteolysis	GO:0006508	0.00337247	2.47205	1600	481	68	20346	ENSMUSG00000031981	ENSMUSG00000002633	ENSMUSG00000071562	ENSMUSG00000030107	ENSMUSG00000030862	ENSMUSG00000071561	ENSMUSG00000022871	ENSMUSG00000001865	ENSMUSG00000061068	ENSMUSG00000048764	ENSMUSG00000040605	ENSMUSG00000079594	ENSMUSG00000035861	ENSMUSG00000044734	ENSMUSG00000033825	ENSMUSG00000034339	ENSMUSG00000028289	ENSMUSG00000050762	ENSMUSG00000028393	ENSMUSG00000033508	ENSMUSG00000037005	ENSMUSG00000034362	ENSMUSG00000055652	ENSMUSG00000026535	ENSMUSG00000057719	ENSMUSG00000036273	ENSMUSG00000021466	ENSMUSG00000026879	ENSMUSG00000030793	ENSMUSG00000054612	ENSMUSG00000000320	ENSMUSG00000059456	ENSMUSG00000022468	ENSMUSG00000037852	ENSMUSG00000024778	ENSMUSG00000062345	ENSMUSG00000035000	ENSMUSG00000073987	ENSMUSG00000005355	ENSMUSG00000000385	ENSMUSG00000054905
GO:BP	oxidation-reduction process	GO:0055114	0.003419	2.4661	1062	792	73	20346	ENSMUSG00000029695	ENSMUSG00000078787	ENSMUSG00000026170	ENSMUSG00000031844	ENSMUSG00000029727	ENSMUSG00000053279	ENSMUSG00000023913	ENSMUSG00000046794	ENSMUSG00000006143	ENSMUSG00000033308	ENSMUSG00000030303	ENSMUSG00000026560	ENSMUSG00000074207	ENSMUSG00000022383	ENSMUSG00000052974	ENSMUSG00000000320	ENSMUSG00000040280	ENSMUSG00000028893	ENSMUSG00000071019	ENSMUSG00000028341	ENSMUSG00000030747	ENSMUSG00000048482	ENSMUSG00000033488	ENSMUSG00000028713	ENSMUSG00000062908	ENSMUSG00000019528	ENSMUSG00000042207	ENSMUSG00000075296	ENSMUSG00000040703	ENSMUSG00000003555	ENSMUSG00000058454	ENSMUSG00000032648	ENSMUSG00000036880	ENSMUSG00000040181	ENSMUSG00000034308	ENSMUSG00000027227	ENSMUSG00000061126	ENSMUSG00000021591	ENSMUSG00000028621	ENSMUSG00000022351	ENSMUSG00000056666
GO:BP	negative regulation of hydrolase activity	GO:0051346	0.00345206	2.46192	441	641	34	20346	ENSMUSG00000071562	ENSMUSG00000071561	ENSMUSG00000022871	ENSMUSG00000079594	ENSMUSG00000044734	ENSMUSG00000034339	ENSMUSG00000034362	ENSMUSG00000020635	ENSMUSG00000052572	ENSMUSG00000026535	ENSMUSG00000057719	ENSMUSG00000036273	ENSMUSG00000062345	ENSMUSG00000054905	ENSMUSG00000044594	ENSMUSG00000059956	ENSMUSG00000002289	ENSMUSG00000020717	ENSMUSG00000036155	ENSMUSG00000027315	ENSMUSG00000005054	ENSMUSG00000046223	ENSMUSG00000053886	ENSMUSG00000031558	ENSMUSG00000037211	ENSMUSG00000081683	ENSMUSG00000001249	ENSMUSG00000035441	ENSMUSG00000004952	ENSMUSG00000034926	ENSMUSG00000025555	ENSMUSG00000031387	ENSMUSG00000027859	ENSMUSG00000024659
GO:BP	alcohol catabolic process	GO:0046164	0.00361305	2.44213	41	750	10	20346	ENSMUSG00000074207	ENSMUSG00000075296	ENSMUSG00000025059	ENSMUSG00000027227	ENSMUSG00000037940	ENSMUSG00000042289	ENSMUSG00000055301	ENSMUSG00000024525	ENSMUSG00000041440	ENSMUSG00000024747
GO:BP	regulation of response to stress	GO:0080134	0.00376062	2.42474	1239	794	82	20346	ENSMUSG00000030107	ENSMUSG00000029671	ENSMUSG00000058022	ENSMUSG00000023886	ENSMUSG00000026981	ENSMUSG00000061762	ENSMUSG00000020635	ENSMUSG00000022383	ENSMUSG00000046834	ENSMUSG00000037362	ENSMUSG00000026535	ENSMUSG00000032064	ENSMUSG00000057719	ENSMUSG00000027347	ENSMUSG00000036273	ENSMUSG00000030793	ENSMUSG00000027639	ENSMUSG00000054612	ENSMUSG00000000320	ENSMUSG00000059456	ENSMUSG00000028893	ENSMUSG00000037025	ENSMUSG00000028341	ENSMUSG00000024778	ENSMUSG00000001123	ENSMUSG00000032238	ENSMUSG00000060477	ENSMUSG00000074093	ENSMUSG00000018899	ENSMUSG00000044594	ENSMUSG00000035273	ENSMUSG00000029217	ENSMUSG00000039208	ENSMUSG00000022037	ENSMUSG00000021025	ENSMUSG00000045294	ENSMUSG00000069255	ENSMUSG00000042244	ENSMUSG00000041939	ENSMUSG00000021457	ENSMUSG00000041135
GO:BP	retinol metabolic process	GO:0042572	0.00392218	2.40647	29	627	8	20346	ENSMUSG00000053279	ENSMUSG00000046402	ENSMUSG00000074207	ENSMUSG00000029134	ENSMUSG00000030747	ENSMUSG00000056666	ENSMUSG00000055301	ENSMUSG00000028236
GO:BP	cell chemotaxis	GO:0060326	0.00471744	2.32629	261	676	25	20346	ENSMUSG00000002633	ENSMUSG00000021508	ENSMUSG00000046354	ENSMUSG00000023913	ENSMUSG00000023886	ENSMUSG00000037362	ENSMUSG00000059456	ENSMUSG00000039115	ENSMUSG00000032380	ENSMUSG00000096001	ENSMUSG00000021457	ENSMUSG00000031558	ENSMUSG00000025473	ENSMUSG00000006445	ENSMUSG00000056071	ENSMUSG00000039145	ENSMUSG00000034855	ENSMUSG00000026166	ENSMUSG00000042289	ENSMUSG00000024486	ENSMUSG00000029380	ENSMUSG00000024659	ENSMUSG00000031955	ENSMUSG00000032591	ENSMUSG00000004951
GO:BP	hormone metabolic process	GO:0042445	0.00507498	2.29457	193	467	17	20346	ENSMUSG00000002633	ENSMUSG00000026170	ENSMUSG00000004885	ENSMUSG00000031844	ENSMUSG00000053279	ENSMUSG00000046402	ENSMUSG00000070990	ENSMUSG00000074207	ENSMUSG00000029134	ENSMUSG00000037852	ENSMUSG00000030747	ENSMUSG00000030790	ENSMUSG00000003555	ENSMUSG00000030792	ENSMUSG00000039007	ENSMUSG00000001249	ENSMUSG00000056666
GO:BP	negative regulation of molecular function	GO:0044092	0.00512791	2.29006	1069	986	86	20346	ENSMUSG00000071562	ENSMUSG00000010175	ENSMUSG00000071561	ENSMUSG00000022871	ENSMUSG00000079594	ENSMUSG00000044734	ENSMUSG00000034339	ENSMUSG00000034362	ENSMUSG00000020635	ENSMUSG00000022383	ENSMUSG00000052572	ENSMUSG00000026535	ENSMUSG00000057719	ENSMUSG00000036273	ENSMUSG00000021466	ENSMUSG00000030793	ENSMUSG00000030103	ENSMUSG00000052087	ENSMUSG00000011632	ENSMUSG00000037025	ENSMUSG00000062345	ENSMUSG00000054905	ENSMUSG00000060477	ENSMUSG00000032715	ENSMUSG00000044594	ENSMUSG00000059956	ENSMUSG00000002289	ENSMUSG00000020717	ENSMUSG00000073802	ENSMUSG00000036155	ENSMUSG00000027315	ENSMUSG00000021025	ENSMUSG00000005054	ENSMUSG00000069255	ENSMUSG00000046223	ENSMUSG00000053886	ENSMUSG00000031558	ENSMUSG00000037211	ENSMUSG00000081683	ENSMUSG00000001249	ENSMUSG00000027499
GO:BP	negative regulation of protein metabolic process	GO:0051248	0.00523466	2.28111	1081	1005	88	20346	ENSMUSG00000002633	ENSMUSG00000071562	ENSMUSG00000071561	ENSMUSG00000022871	ENSMUSG00000049107	ENSMUSG00000040605	ENSMUSG00000079594	ENSMUSG00000032841	ENSMUSG00000022598	ENSMUSG00000044734	ENSMUSG00000034339	ENSMUSG00000028393	ENSMUSG00000034362	ENSMUSG00000020635	ENSMUSG00000037035	ENSMUSG00000026535	ENSMUSG00000057719	ENSMUSG00000036273	ENSMUSG00000030793	ENSMUSG00000052087	ENSMUSG00000028893	ENSMUSG00000031438	ENSMUSG00000062345	ENSMUSG00000026185	ENSMUSG00000054905	ENSMUSG00000074093	ENSMUSG00000032715	ENSMUSG00000018899	ENSMUSG00000044594	ENSMUSG00000059956	ENSMUSG00000020717	ENSMUSG00000073802	ENSMUSG00000036155	ENSMUSG00000027315	ENSMUSG00000022037	ENSMUSG00000031214	ENSMUSG00000005054	ENSMUSG00000069255	ENSMUSG00000046223	ENSMUSG00000041939	ENSMUSG00000032193
GO:BP	cellular response to chemical stimulus	GO:0070887	0.00558246	2.25317	2670	986	179	20346	ENSMUSG00000002633	ENSMUSG00000024526	ENSMUSG00000029671	ENSMUSG00000024109	ENSMUSG00000021508	ENSMUSG00000025582	ENSMUSG00000017491	ENSMUSG00000046354	ENSMUSG00000023913	ENSMUSG00000032841	ENSMUSG00000058022	ENSMUSG00000027500	ENSMUSG00000023886	ENSMUSG00000016918	ENSMUSG00000051367	ENSMUSG00000028393	ENSMUSG00000037161	ENSMUSG00000026981	ENSMUSG00000061762	ENSMUSG00000006143	ENSMUSG00000029602	ENSMUSG00000020635	ENSMUSG00000037035	ENSMUSG00000069917	ENSMUSG00000050295	ENSMUSG00000022512	ENSMUSG00000044041	ENSMUSG00000022383	ENSMUSG00000037362	ENSMUSG00000052572	ENSMUSG00000026535	ENSMUSG00000027890	ENSMUSG00000036273	ENSMUSG00000021466	ENSMUSG00000069919	ENSMUSG00000026879	ENSMUSG00000052974	ENSMUSG00000030793	ENSMUSG00000030287	ENSMUSG00000027639	ENSMUSG00000022018
GO:BP	tube morphogenesis	GO:0035239	0.00559959	2.25184	859	832	64	20346	ENSMUSG00000002633	ENSMUSG00000010175	ENSMUSG00000020140	ENSMUSG00000024109	ENSMUSG00000058022	ENSMUSG00000023886	ENSMUSG00000028289	ENSMUSG00000016918	ENSMUSG00000051367	ENSMUSG00000029378	ENSMUSG00000050295	ENSMUSG00000021281	ENSMUSG00000037362	ENSMUSG00000021466	ENSMUSG00000022018	ENSMUSG00000000320	ENSMUSG00000022469	ENSMUSG00000059456	ENSMUSG00000037025	ENSMUSG00000028341	ENSMUSG00000032238	ENSMUSG00000030790	ENSMUSG00000042207	ENSMUSG00000002289	ENSMUSG00000020717	ENSMUSG00000035273	ENSMUSG00000027315	ENSMUSG00000064246	ENSMUSG00000057315	ENSMUSG00000026473	ENSMUSG00000020902	ENSMUSG00000021457	ENSMUSG00000022893	ENSMUSG00000039062	ENSMUSG00000010660	ENSMUSG00000031558	ENSMUSG00000037211	ENSMUSG00000025473	ENSMUSG00000006445	ENSMUSG00000059327	ENSMUSG00000034855
GO:BP	organophosphate metabolic process	GO:0019637	0.00567665	2.24591	813	1011	71	20346	ENSMUSG00000029695	ENSMUSG00000023913	ENSMUSG00000070644	ENSMUSG00000020407	ENSMUSG00000030303	ENSMUSG00000023960	ENSMUSG00000029154	ENSMUSG00000028749	ENSMUSG00000033520	ENSMUSG00000022383	ENSMUSG00000042249	ENSMUSG00000036273	ENSMUSG00000027639	ENSMUSG00000021148	ENSMUSG00000059456	ENSMUSG00000029134	ENSMUSG00000046971	ENSMUSG00000030747	ENSMUSG00000027533	ENSMUSG00000032238	ENSMUSG00000028894	ENSMUSG00000041939	ENSMUSG00000022574	ENSMUSG00000036880	ENSMUSG00000025059	ENSMUSG00000032193	ENSMUSG00000010660	ENSMUSG00000018796	ENSMUSG00000026317	ENSMUSG00000037940	ENSMUSG00000006445	ENSMUSG00000039616	ENSMUSG00000003752	ENSMUSG00000000253	ENSMUSG00000059743	ENSMUSG00000017390	ENSMUSG00000025950	ENSMUSG00000003271	ENSMUSG00000025277	ENSMUSG00000060675	ENSMUSG00000024525
GO:BP	regulation of signaling	GO:0023051	0.00590367	2.22888	3217	758	167	20346	ENSMUSG00000026058	ENSMUSG00000002633	ENSMUSG00000027674	ENSMUSG00000024526	ENSMUSG00000030666	ENSMUSG00000004885	ENSMUSG00000026875	ENSMUSG00000029671	ENSMUSG00000020140	ENSMUSG00000024109	ENSMUSG00000020218	ENSMUSG00000021508	ENSMUSG00000025582	ENSMUSG00000049107	ENSMUSG00000039364	ENSMUSG00000032841	ENSMUSG00000022598	ENSMUSG00000023886	ENSMUSG00000028289	ENSMUSG00000016918	ENSMUSG00000041012	ENSMUSG00000050957	ENSMUSG00000035305	ENSMUSG00000025407	ENSMUSG00000029335	ENSMUSG00000042988	ENSMUSG00000026981	ENSMUSG00000061762	ENSMUSG00000029602	ENSMUSG00000020635	ENSMUSG00000037035	ENSMUSG00000029378	ENSMUSG00000037362	ENSMUSG00000042249	ENSMUSG00000032064	ENSMUSG00000057719	ENSMUSG00000027347	ENSMUSG00000061132	ENSMUSG00000036273	ENSMUSG00000021466	ENSMUSG00000026879
GO:BP	regulation of cell communication	GO:0010646	0.0059748	2.22368	3201	692	154	20346	ENSMUSG00000026058	ENSMUSG00000002633	ENSMUSG00000027674	ENSMUSG00000024526	ENSMUSG00000030666	ENSMUSG00000004885	ENSMUSG00000026875	ENSMUSG00000029671	ENSMUSG00000020140	ENSMUSG00000024109	ENSMUSG00000020218	ENSMUSG00000021508	ENSMUSG00000025582	ENSMUSG00000049107	ENSMUSG00000039364	ENSMUSG00000032841	ENSMUSG00000022598	ENSMUSG00000023886	ENSMUSG00000028289	ENSMUSG00000016918	ENSMUSG00000041012	ENSMUSG00000050957	ENSMUSG00000035305	ENSMUSG00000025407	ENSMUSG00000029335	ENSMUSG00000042988	ENSMUSG00000026981	ENSMUSG00000061762	ENSMUSG00000029602	ENSMUSG00000020635	ENSMUSG00000037035	ENSMUSG00000029378	ENSMUSG00000037362	ENSMUSG00000042249	ENSMUSG00000032064	ENSMUSG00000057719	ENSMUSG00000027347	ENSMUSG00000061132	ENSMUSG00000036273	ENSMUSG00000021466	ENSMUSG00000026879
GO:BP	regulation of signal transduction	GO:0009966	0.0063915	2.1944	2880	488	106	20346	ENSMUSG00000026058	ENSMUSG00000002633	ENSMUSG00000027674	ENSMUSG00000024526	ENSMUSG00000030666	ENSMUSG00000004885	ENSMUSG00000026875	ENSMUSG00000029671	ENSMUSG00000020140	ENSMUSG00000024109	ENSMUSG00000020218	ENSMUSG00000021508	ENSMUSG00000025582	ENSMUSG00000049107	ENSMUSG00000039364	ENSMUSG00000032841	ENSMUSG00000022598	ENSMUSG00000023886	ENSMUSG00000028289	ENSMUSG00000016918	ENSMUSG00000041012	ENSMUSG00000050957	ENSMUSG00000035305	ENSMUSG00000025407	ENSMUSG00000029335	ENSMUSG00000042988	ENSMUSG00000026981	ENSMUSG00000029602	ENSMUSG00000020635	ENSMUSG00000037035	ENSMUSG00000029378	ENSMUSG00000037362	ENSMUSG00000042249	ENSMUSG00000032064	ENSMUSG00000057719	ENSMUSG00000027347	ENSMUSG00000061132	ENSMUSG00000036273	ENSMUSG00000021466	ENSMUSG00000026879	ENSMUSG00000030793
GO:BP	multicellular organismal water homeostasis	GO:0050891	0.00682147	2.16612	39	851	10	20346	ENSMUSG00000022512	ENSMUSG00000046834	ENSMUSG00000030873	ENSMUSG00000000320	ENSMUSG00000000216	ENSMUSG00000047501	ENSMUSG00000037188	ENSMUSG00000028048	ENSMUSG00000001420	ENSMUSG00000030340
GO:BP	cell-cell adhesion	GO:0098609	0.00713104	2.14685	734	1002	65	20346	ENSMUSG00000002633	ENSMUSG00000036466	ENSMUSG00000024109	ENSMUSG00000039683	ENSMUSG00000058022	ENSMUSG00000028289	ENSMUSG00000026981	ENSMUSG00000028749	ENSMUSG00000022512	ENSMUSG00000022383	ENSMUSG00000037362	ENSMUSG00000027347	ENSMUSG00000055976	ENSMUSG00000030793	ENSMUSG00000022018	ENSMUSG00000000320	ENSMUSG00000018569	ENSMUSG00000028341	ENSMUSG00000024331	ENSMUSG00000069441	ENSMUSG00000001123	ENSMUSG00000000732	ENSMUSG00000035000	ENSMUSG00000018899	ENSMUSG00000020717	ENSMUSG00000069255	ENSMUSG00000020902	ENSMUSG00000021457	ENSMUSG00000041135	ENSMUSG00000031558	ENSMUSG00000047501	ENSMUSG00000025473	ENSMUSG00000027298	ENSMUSG00000056071	ENSMUSG00000036931	ENSMUSG00000008090	ENSMUSG00000045394	ENSMUSG00000074637	ENSMUSG00000022817	ENSMUSG00000006411	ENSMUSG00000039384
GO:BP	response to ethanol	GO:0045471	0.0072784	2.13796	147	213	10	20346	ENSMUSG00000002633	ENSMUSG00000053279	ENSMUSG00000028393	ENSMUSG00000074207	ENSMUSG00000022512	ENSMUSG00000026879	ENSMUSG00000030287	ENSMUSG00000054612	ENSMUSG00000018569	ENSMUSG00000059456
GO:BP	gland morphogenesis	GO:0022612	0.00736654	2.13274	134	480	14	20346	ENSMUSG00000002633	ENSMUSG00000010175	ENSMUSG00000016918	ENSMUSG00000025407	ENSMUSG00000029378	ENSMUSG00000003051	ENSMUSG00000021466	ENSMUSG00000026185	ENSMUSG00000042207	ENSMUSG00000020902	ENSMUSG00000031558	ENSMUSG00000001249	ENSMUSG00000006445	ENSMUSG00000059327
GO:BP	regulation of protein serine/threonine kinase activity	GO:0071900	0.007655	2.11605	431	868	40	20346	ENSMUSG00000010175	ENSMUSG00000024109	ENSMUSG00000049107	ENSMUSG00000026981	ENSMUSG00000027347	ENSMUSG00000036273	ENSMUSG00000030793	ENSMUSG00000022018	ENSMUSG00000063239	ENSMUSG00000052087	ENSMUSG00000059456	ENSMUSG00000028893	ENSMUSG00000001123	ENSMUSG00000032715	ENSMUSG00000073802	ENSMUSG00000021457	ENSMUSG00000041135	ENSMUSG00000071369	ENSMUSG00000037211	ENSMUSG00000018796	ENSMUSG00000025473	ENSMUSG00000081683	ENSMUSG00000027499	ENSMUSG00000056313	ENSMUSG00000039384	ENSMUSG00000024235	ENSMUSG00000032501	ENSMUSG00000032591	ENSMUSG00000004951	ENSMUSG00000030867	ENSMUSG00000018334	ENSMUSG00000037049	ENSMUSG00000049313	ENSMUSG00000028048	ENSMUSG00000021367	ENSMUSG00000022382	ENSMUSG00000004451	ENSMUSG00000074272	ENSMUSG00000000708	ENSMUSG00000031530
GO:BP	cellular lipid catabolic process	GO:0044242	0.00778896	2.10852	164	904	22	20346	ENSMUSG00000058022	ENSMUSG00000027761	ENSMUSG00000028893	ENSMUSG00000046971	ENSMUSG00000062908	ENSMUSG00000036880	ENSMUSG00000032193	ENSMUSG00000025950	ENSMUSG00000033174	ENSMUSG00000025277	ENSMUSG00000027984	ENSMUSG00000074604	ENSMUSG00000021226	ENSMUSG00000026003	ENSMUSG00000037049	ENSMUSG00000028048	ENSMUSG00000059447	ENSMUSG00000038894	ENSMUSG00000059316	ENSMUSG00000028937	ENSMUSG00000032540	ENSMUSG00000032046
GO:BP	protection from natural killer cell mediated cytotoxicity	GO:0042270	0.00808347	2.0924	7	932	5	20346	ENSMUSG00000044594	ENSMUSG00000030157	ENSMUSG00000037321	ENSMUSG00000067212	ENSMUSG00000024339
GO:BP	retinoid metabolic process	GO:0001523	0.00856278	2.06739	53	254	7	20346	ENSMUSG00000004885	ENSMUSG00000053279	ENSMUSG00000046402	ENSMUSG00000032454	ENSMUSG00000074207	ENSMUSG00000029134	ENSMUSG00000030747
GO:BP	cell population proliferation	GO:0008283	0.0085723	2.0669	1936	1025	141	20346	ENSMUSG00000002633	ENSMUSG00000025491	ENSMUSG00000010175	ENSMUSG00000035158	ENSMUSG00000028699	ENSMUSG00000029671	ENSMUSG00000020140	ENSMUSG00000017491	ENSMUSG00000059668	ENSMUSG00000049107	ENSMUSG00000029322	ENSMUSG00000016918	ENSMUSG00000051367	ENSMUSG00000025407	ENSMUSG00000047143	ENSMUSG00000023968	ENSMUSG00000022330	ENSMUSG00000061762	ENSMUSG00000020635	ENSMUSG00000029378	ENSMUSG00000050295	ENSMUSG00000028749	ENSMUSG00000037362	ENSMUSG00000032064	ENSMUSG00000036273	ENSMUSG00000043004	ENSMUSG00000021466	ENSMUSG00000030793	ENSMUSG00000022018	ENSMUSG00000000320	ENSMUSG00000018569	ENSMUSG00000059456	ENSMUSG00000028341	ENSMUSG00000024778	ENSMUSG00000001123	ENSMUSG00000000732	ENSMUSG00000035000	ENSMUSG00000026185	ENSMUSG00000022218	ENSMUSG00000048482	ENSMUSG00000053846
GO:BP	negative regulation of response to biotic stimulus	GO:0002832	0.00858068	2.06648	82	932	15	20346	ENSMUSG00000026535	ENSMUSG00000027639	ENSMUSG00000001123	ENSMUSG00000044594	ENSMUSG00000027298	ENSMUSG00000038576	ENSMUSG00000039384	ENSMUSG00000032501	ENSMUSG00000030157	ENSMUSG00000037321	ENSMUSG00000032109	ENSMUSG00000067377	ENSMUSG00000067212	ENSMUSG00000074272	ENSMUSG00000024339
GO:BP	negative regulation of immune response	GO:0050777	0.00863593	2.06369	143	968	21	20346	ENSMUSG00000026535	ENSMUSG00000027639	ENSMUSG00000001123	ENSMUSG00000018899	ENSMUSG00000044594	ENSMUSG00000069255	ENSMUSG00000042244	ENSMUSG00000027298	ENSMUSG00000038576	ENSMUSG00000039384	ENSMUSG00000024659	ENSMUSG00000030157	ENSMUSG00000044244	ENSMUSG00000037321	ENSMUSG00000032679	ENSMUSG00000032109	ENSMUSG00000067212	ENSMUSG00000074272	ENSMUSG00000030748	ENSMUSG00000024339	ENSMUSG00000039239
GO:BP	morphogenesis of an epithelium	GO:0002009	0.00891782	2.04974	502	832	43	20346	ENSMUSG00000002633	ENSMUSG00000010175	ENSMUSG00000020140	ENSMUSG00000053279	ENSMUSG00000028289	ENSMUSG00000016918	ENSMUSG00000070990	ENSMUSG00000051367	ENSMUSG00000029378	ENSMUSG00000030873	ENSMUSG00000021466	ENSMUSG00000000320	ENSMUSG00000000216	ENSMUSG00000037025	ENSMUSG00000026185	ENSMUSG00000030790	ENSMUSG00000042207	ENSMUSG00000027315	ENSMUSG00000031214	ENSMUSG00000057315	ENSMUSG00000020902	ENSMUSG00000031558	ENSMUSG00000032068	ENSMUSG00000037211	ENSMUSG00000031661	ENSMUSG00000006445	ENSMUSG00000034855	ENSMUSG00000035112	ENSMUSG00000037188	ENSMUSG00000024486	ENSMUSG00000035557	ENSMUSG00000031734	ENSMUSG00000026383	ENSMUSG00000032591	ENSMUSG00000005251	ENSMUSG00000021367	ENSMUSG00000026121	ENSMUSG00000022382	ENSMUSG00000019737	ENSMUSG00000029381	ENSMUSG00000044042
GO:BP	regulation of body fluid levels	GO:0050878	0.00957659	2.01879	308	967	34	20346	ENSMUSG00000002633	ENSMUSG00000058022	ENSMUSG00000061762	ENSMUSG00000022512	ENSMUSG00000046834	ENSMUSG00000030873	ENSMUSG00000032202	ENSMUSG00000000320	ENSMUSG00000000216	ENSMUSG00000037025	ENSMUSG00000061751	ENSMUSG00000030790	ENSMUSG00000035273	ENSMUSG00000029217	ENSMUSG00000021457	ENSMUSG00000047501	ENSMUSG00000027298	ENSMUSG00000056071	ENSMUSG00000035112	ENSMUSG00000037188	ENSMUSG00000039942	ENSMUSG00000050761	ENSMUSG00000006519	ENSMUSG00000032231	ENSMUSG00000028048	ENSMUSG00000021367	ENSMUSG00000001420	ENSMUSG00000074272	ENSMUSG00000030340	ENSMUSG00000034664	ENSMUSG00000032462	ENSMUSG00000028128	ENSMUSG00000028583	ENSMUSG00000060708
GO:BP	cellular response to inorganic substance	GO:0071241	0.00998304	2.00074	196	245	12	20346	ENSMUSG00000002633	ENSMUSG00000024109	ENSMUSG00000025582	ENSMUSG00000028393	ENSMUSG00000029602	ENSMUSG00000022512	ENSMUSG00000052572	ENSMUSG00000036273	ENSMUSG00000026879	ENSMUSG00000025993	ENSMUSG00000032348	ENSMUSG00000024778
GO:BP	cellular hormone metabolic process	GO:0034754	0.010185	1.99204	94	349	10	20346	ENSMUSG00000002633	ENSMUSG00000004885	ENSMUSG00000031844	ENSMUSG00000053279	ENSMUSG00000046402	ENSMUSG00000074207	ENSMUSG00000029134	ENSMUSG00000030747	ENSMUSG00000030790	ENSMUSG00000003555
GO:BP	terpenoid metabolic process	GO:0006721	0.0104662	1.98021	66	627	11	20346	ENSMUSG00000004885	ENSMUSG00000053279	ENSMUSG00000046402	ENSMUSG00000032454	ENSMUSG00000074207	ENSMUSG00000029134	ENSMUSG00000030747	ENSMUSG00000056666	ENSMUSG00000059743	ENSMUSG00000055301	ENSMUSG00000028236
GO:BP	cell development	GO:0048468	0.0107585	1.96825	2087	187	40	20346	ENSMUSG00000002633	ENSMUSG00000010175	ENSMUSG00000025876	ENSMUSG00000004885	ENSMUSG00000020140	ENSMUSG00000024109	ENSMUSG00000039683	ENSMUSG00000025582	ENSMUSG00000017491	ENSMUSG00000049107	ENSMUSG00000044748	ENSMUSG00000040605	ENSMUSG00000027500	ENSMUSG00000043924	ENSMUSG00000028289	ENSMUSG00000016918	ENSMUSG00000050957	ENSMUSG00000051367	ENSMUSG00000035305	ENSMUSG00000047143	ENSMUSG00000025432	ENSMUSG00000029602	ENSMUSG00000050623	ENSMUSG00000020635	ENSMUSG00000037035	ENSMUSG00000029378	ENSMUSG00000045136	ENSMUSG00000069917	ENSMUSG00000050295	ENSMUSG00000022512	ENSMUSG00000022383	ENSMUSG00000052572	ENSMUSG00000032064	ENSMUSG00000021338	ENSMUSG00000036273	ENSMUSG00000021466	ENSMUSG00000069919	ENSMUSG00000026879	ENSMUSG00000045871	ENSMUSG00000026304
GO:BP	response to nutrient levels	GO:0031667	0.0111283	1.95357	488	922	45	20346	ENSMUSG00000010175	ENSMUSG00000046402	ENSMUSG00000028393	ENSMUSG00000020407	ENSMUSG00000033308	ENSMUSG00000020635	ENSMUSG00000037035	ENSMUSG00000022383	ENSMUSG00000036273	ENSMUSG00000026879	ENSMUSG00000021565	ENSMUSG00000054612	ENSMUSG00000028893	ENSMUSG00000037025	ENSMUSG00000024331	ENSMUSG00000024778	ENSMUSG00000053846	ENSMUSG00000062908	ENSMUSG00000002289	ENSMUSG00000073802	ENSMUSG00000026473	ENSMUSG00000009772	ENSMUSG00000025372	ENSMUSG00000032193	ENSMUSG00000071369	ENSMUSG00000027227	ENSMUSG00000018796	ENSMUSG00000045573	ENSMUSG00000026819	ENSMUSG00000074489	ENSMUSG00000078816	ENSMUSG00000006519	ENSMUSG00000020838	ENSMUSG00000040506	ENSMUSG00000027447	ENSMUSG00000038332	ENSMUSG00000028048	ENSMUSG00000029482	ENSMUSG00000004451	ENSMUSG00000054640	ENSMUSG00000059316
GO:BP	response to antibiotic	GO:0046677	0.011156	1.95249	368	469	24	20346	ENSMUSG00000002633	ENSMUSG00000053279	ENSMUSG00000028393	ENSMUSG00000020635	ENSMUSG00000029378	ENSMUSG00000074207	ENSMUSG00000022512	ENSMUSG00000036273	ENSMUSG00000026879	ENSMUSG00000030287	ENSMUSG00000054612	ENSMUSG00000018569	ENSMUSG00000059456	ENSMUSG00000028341	ENSMUSG00000046971	ENSMUSG00000073987	ENSMUSG00000046352	ENSMUSG00000042207	ENSMUSG00000024912	ENSMUSG00000022037	ENSMUSG00000025059	ENSMUSG00000071369	ENSMUSG00000021591	ENSMUSG00000045573
GO:BP	positive regulation of cell differentiation	GO:0045597	0.0112195	1.95003	1049	682	63	20346	ENSMUSG00000002633	ENSMUSG00000055027	ENSMUSG00000025491	ENSMUSG00000010175	ENSMUSG00000028681	ENSMUSG00000004885	ENSMUSG00000020218	ENSMUSG00000017491	ENSMUSG00000049107	ENSMUSG00000027500	ENSMUSG00000047143	ENSMUSG00000025432	ENSMUSG00000029602	ENSMUSG00000020635	ENSMUSG00000045136	ENSMUSG00000050295	ENSMUSG00000032064	ENSMUSG00000027347	ENSMUSG00000021338	ENSMUSG00000021466	ENSMUSG00000022018	ENSMUSG00000052087	ENSMUSG00000059456	ENSMUSG00000037025	ENSMUSG00000001123	ENSMUSG00000061751	ENSMUSG00000048482	ENSMUSG00000030790	ENSMUSG00000018899	ENSMUSG00000022996	ENSMUSG00000030792	ENSMUSG00000039208	ENSMUSG00000027315	ENSMUSG00000022037	ENSMUSG00000022952	ENSMUSG00000020902	ENSMUSG00000021457	ENSMUSG00000022893	ENSMUSG00000025372	ENSMUSG00000041135	ENSMUSG00000071369
GO:BP	negative regulation of response to external stimulus	GO:0032102	0.0114903	1.93967	333	941	35	20346	ENSMUSG00000024109	ENSMUSG00000058022	ENSMUSG00000022383	ENSMUSG00000046834	ENSMUSG00000037362	ENSMUSG00000026535	ENSMUSG00000030793	ENSMUSG00000027639	ENSMUSG00000000320	ENSMUSG00000001123	ENSMUSG00000032238	ENSMUSG00000044594	ENSMUSG00000039208	ENSMUSG00000041939	ENSMUSG00000032193	ENSMUSG00000031558	ENSMUSG00000027298	ENSMUSG00000039942	ENSMUSG00000038576	ENSMUSG00000039384	ENSMUSG00000032501	ENSMUSG00000001348	ENSMUSG00000043811	ENSMUSG00000030157	ENSMUSG00000032420	ENSMUSG00000044244	ENSMUSG00000032231	ENSMUSG00000037321	ENSMUSG00000032109	ENSMUSG00000067377	ENSMUSG00000067212	ENSMUSG00000074272	ENSMUSG00000030659	ENSMUSG00000024339	ENSMUSG00000031398
GO:BP	carboxylic acid biosynthetic process	GO:0046394	0.0122284	1.91263	267	885	29	20346	ENSMUSG00000033427	ENSMUSG00000010175	ENSMUSG00000030268	ENSMUSG00000004885	ENSMUSG00000053279	ENSMUSG00000046402	ENSMUSG00000033308	ENSMUSG00000000320	ENSMUSG00000046971	ENSMUSG00000027533	ENSMUSG00000032715	ENSMUSG00000024378	ENSMUSG00000026473	ENSMUSG00000045294	ENSMUSG00000021457	ENSMUSG00000031483	ENSMUSG00000033174	ENSMUSG00000039942	ENSMUSG00000027605	ENSMUSG00000036775	ENSMUSG00000024659	ENSMUSG00000074604	ENSMUSG00000025198	ENSMUSG00000025068	ENSMUSG00000021367	ENSMUSG00000031910	ENSMUSG00000074272	ENSMUSG00000028937	ENSMUSG00000025203
GO:BP	immune system process	GO:0002376	0.0122685	1.91121	2191	968	148	20346	ENSMUSG00000002633	ENSMUSG00000025491	ENSMUSG00000035158	ENSMUSG00000022986	ENSMUSG00000021508	ENSMUSG00000039364	ENSMUSG00000044748	ENSMUSG00000023913	ENSMUSG00000046402	ENSMUSG00000058022	ENSMUSG00000006342	ENSMUSG00000070990	ENSMUSG00000051367	ENSMUSG00000028386	ENSMUSG00000023968	ENSMUSG00000026981	ENSMUSG00000061762	ENSMUSG00000020635	ENSMUSG00000069917	ENSMUSG00000050295	ENSMUSG00000028749	ENSMUSG00000022512	ENSMUSG00000046834	ENSMUSG00000037362	ENSMUSG00000026535	ENSMUSG00000027347	ENSMUSG00000061132	ENSMUSG00000036273	ENSMUSG00000069919	ENSMUSG00000026879	ENSMUSG00000026304	ENSMUSG00000030793	ENSMUSG00000032202	ENSMUSG00000027639	ENSMUSG00000022018	ENSMUSG00000048416	ENSMUSG00000059456	ENSMUSG00000025993	ENSMUSG00000022468	ENSMUSG00000039115	ENSMUSG00000028341
GO:BP	negative regulation of immune effector process	GO:0002698	0.0130496	1.8844	124	968	19	20346	ENSMUSG00000001123	ENSMUSG00000018899	ENSMUSG00000044594	ENSMUSG00000069255	ENSMUSG00000042244	ENSMUSG00000038576	ENSMUSG00000039384	ENSMUSG00000024659	ENSMUSG00000030157	ENSMUSG00000044244	ENSMUSG00000037321	ENSMUSG00000032679	ENSMUSG00000032109	ENSMUSG00000067377	ENSMUSG00000067212	ENSMUSG00000074272	ENSMUSG00000030748	ENSMUSG00000024339	ENSMUSG00000039239
GO:BP	positive regulation of response to external stimulus	GO:0032103	0.0132564	1.87758	460	485	28	20346	ENSMUSG00000002633	ENSMUSG00000021508	ENSMUSG00000049107	ENSMUSG00000023913	ENSMUSG00000023886	ENSMUSG00000061762	ENSMUSG00000020635	ENSMUSG00000045136	ENSMUSG00000026535	ENSMUSG00000027347	ENSMUSG00000036273	ENSMUSG00000030793	ENSMUSG00000059456	ENSMUSG00000001123	ENSMUSG00000028539	ENSMUSG00000032380	ENSMUSG00000060477	ENSMUSG00000018899	ENSMUSG00000021025	ENSMUSG00000042244	ENSMUSG00000041135	ENSMUSG00000032193	ENSMUSG00000031558	ENSMUSG00000025473	ENSMUSG00000027298	ENSMUSG00000056071	ENSMUSG00000039145	ENSMUSG00000034855
GO:BP	positive regulation of cell migration	GO:0030335	0.0136774	1.864	505	676	37	20346	ENSMUSG00000002633	ENSMUSG00000010175	ENSMUSG00000021508	ENSMUSG00000049107	ENSMUSG00000023913	ENSMUSG00000023886	ENSMUSG00000025407	ENSMUSG00000061762	ENSMUSG00000057719	ENSMUSG00000021338	ENSMUSG00000030793	ENSMUSG00000000320	ENSMUSG00000022469	ENSMUSG00000059456	ENSMUSG00000028341	ENSMUSG00000001123	ENSMUSG00000032380	ENSMUSG00000026185	ENSMUSG00000020717	ENSMUSG00000036155	ENSMUSG00000022893	ENSMUSG00000032068	ENSMUSG00000025473	ENSMUSG00000039145	ENSMUSG00000034855	ENSMUSG00000026166	ENSMUSG00000051517	ENSMUSG00000039942	ENSMUSG00000024486	ENSMUSG00000021701	ENSMUSG00000008601	ENSMUSG00000024659	ENSMUSG00000004771	ENSMUSG00000026383	ENSMUSG00000031955	ENSMUSG00000041845	ENSMUSG00000004951
GO:BP	regulation of nervous system development	GO:0051960	0.0138829	1.85752	957	249	29	20346	ENSMUSG00000002633	ENSMUSG00000010175	ENSMUSG00000004885	ENSMUSG00000024109	ENSMUSG00000039683	ENSMUSG00000025582	ENSMUSG00000017491	ENSMUSG00000049107	ENSMUSG00000027500	ENSMUSG00000043924	ENSMUSG00000028289	ENSMUSG00000051367	ENSMUSG00000025407	ENSMUSG00000047143	ENSMUSG00000025432	ENSMUSG00000029602	ENSMUSG00000020635	ENSMUSG00000045136	ENSMUSG00000032064	ENSMUSG00000036273	ENSMUSG00000045871	ENSMUSG00000026304	ENSMUSG00000052087	ENSMUSG00000059456	ENSMUSG00000037025	ENSMUSG00000037852	ENSMUSG00000028184	ENSMUSG00000024778	ENSMUSG00000060780
GO:BP	organic acid biosynthetic process	GO:0016053	0.0141488	1.84928	269	885	29	20346	ENSMUSG00000033427	ENSMUSG00000010175	ENSMUSG00000030268	ENSMUSG00000004885	ENSMUSG00000053279	ENSMUSG00000046402	ENSMUSG00000033308	ENSMUSG00000000320	ENSMUSG00000046971	ENSMUSG00000027533	ENSMUSG00000032715	ENSMUSG00000024378	ENSMUSG00000026473	ENSMUSG00000045294	ENSMUSG00000021457	ENSMUSG00000031483	ENSMUSG00000033174	ENSMUSG00000039942	ENSMUSG00000027605	ENSMUSG00000036775	ENSMUSG00000024659	ENSMUSG00000074604	ENSMUSG00000025198	ENSMUSG00000025068	ENSMUSG00000021367	ENSMUSG00000031910	ENSMUSG00000074272	ENSMUSG00000028937	ENSMUSG00000025203
GO:BP	negative regulation of multicellular organismal process	GO:0051241	0.0143874	1.84202	1263	832	84	20346	ENSMUSG00000002633	ENSMUSG00000024526	ENSMUSG00000017491	ENSMUSG00000029322	ENSMUSG00000053279	ENSMUSG00000058022	ENSMUSG00000027500	ENSMUSG00000028289	ENSMUSG00000016918	ENSMUSG00000051367	ENSMUSG00000061762	ENSMUSG00000020635	ENSMUSG00000037035	ENSMUSG00000029378	ENSMUSG00000050295	ENSMUSG00000022383	ENSMUSG00000037362	ENSMUSG00000032064	ENSMUSG00000036273	ENSMUSG00000021466	ENSMUSG00000030793	ENSMUSG00000022018	ENSMUSG00000000320	ENSMUSG00000059456	ENSMUSG00000034765	ENSMUSG00000037025	ENSMUSG00000037852	ENSMUSG00000024778	ENSMUSG00000031438	ENSMUSG00000001123	ENSMUSG00000026185	ENSMUSG00000048482	ENSMUSG00000027210	ENSMUSG00000030790	ENSMUSG00000018899	ENSMUSG00000022996	ENSMUSG00000073802	ENSMUSG00000031488	ENSMUSG00000021025	ENSMUSG00000020902	ENSMUSG00000042244
GO:BP	response to organic substance	GO:0010033	0.0154639	1.81068	3024	986	196	20346	ENSMUSG00000002633	ENSMUSG00000025491	ENSMUSG00000024526	ENSMUSG00000030107	ENSMUSG00000024109	ENSMUSG00000039683	ENSMUSG00000031844	ENSMUSG00000017491	ENSMUSG00000044748	ENSMUSG00000053279	ENSMUSG00000046402	ENSMUSG00000058022	ENSMUSG00000027500	ENSMUSG00000023886	ENSMUSG00000016918	ENSMUSG00000051367	ENSMUSG00000028393	ENSMUSG00000037161	ENSMUSG00000026981	ENSMUSG00000061762	ENSMUSG00000028494	ENSMUSG00000033308	ENSMUSG00000020635	ENSMUSG00000037035	ENSMUSG00000029378	ENSMUSG00000074207	ENSMUSG00000050295	ENSMUSG00000022512	ENSMUSG00000044041	ENSMUSG00000022383	ENSMUSG00000026535	ENSMUSG00000036273	ENSMUSG00000021466	ENSMUSG00000026879	ENSMUSG00000030793	ENSMUSG00000030287	ENSMUSG00000027639	ENSMUSG00000054612	ENSMUSG00000000320	ENSMUSG00000022469	ENSMUSG00000018569
GO:BP	regulation of fatty acid metabolic process	GO:0019217	0.0160896	1.79346	87	922	15	20346	ENSMUSG00000022383	ENSMUSG00000028341	ENSMUSG00000030747	ENSMUSG00000027533	ENSMUSG00000032715	ENSMUSG00000047443	ENSMUSG00000045294	ENSMUSG00000025059	ENSMUSG00000031483	ENSMUSG00000024659	ENSMUSG00000025198	ENSMUSG00000038894	ENSMUSG00000074272	ENSMUSG00000031278	ENSMUSG00000030659
GO:BP	localization	GO:0051179	0.0174537	1.75811	5456	687	235	20346	ENSMUSG00000030307	ENSMUSG00000002633	ENSMUSG00000025491	ENSMUSG00000010175	ENSMUSG00000035158	ENSMUSG00000027674	ENSMUSG00000028699	ENSMUSG00000024526	ENSMUSG00000013611	ENSMUSG00000030108	ENSMUSG00000024109	ENSMUSG00000021508	ENSMUSG00000025582	ENSMUSG00000046354	ENSMUSG00000049107	ENSMUSG00000038094	ENSMUSG00000026961	ENSMUSG00000004988	ENSMUSG00000044748	ENSMUSG00000023913	ENSMUSG00000032841	ENSMUSG00000058022	ENSMUSG00000021509	ENSMUSG00000023886	ENSMUSG00000006342	ENSMUSG00000053897	ENSMUSG00000016918	ENSMUSG00000070990	ENSMUSG00000050957	ENSMUSG00000051367	ENSMUSG00000028386	ENSMUSG00000025407	ENSMUSG00000037161	ENSMUSG00000026981	ENSMUSG00000061762	ENSMUSG00000028494	ENSMUSG00000050623	ENSMUSG00000020635	ENSMUSG00000037035	ENSMUSG00000045136	ENSMUSG00000069917
GO:BP	negative regulation of natural killer cell mediated cytotoxicity	GO:0045953	0.0175931	1.75466	18	932	7	20346	ENSMUSG00000001123	ENSMUSG00000044594	ENSMUSG00000030157	ENSMUSG00000037321	ENSMUSG00000067212	ENSMUSG00000074272	ENSMUSG00000024339
GO:BP	water homeostasis	GO:0030104	0.0176752	1.75264	43	851	10	20346	ENSMUSG00000022512	ENSMUSG00000046834	ENSMUSG00000030873	ENSMUSG00000000320	ENSMUSG00000000216	ENSMUSG00000047501	ENSMUSG00000037188	ENSMUSG00000028048	ENSMUSG00000001420	ENSMUSG00000030340
GO:BP	diterpenoid metabolic process	GO:0016101	0.0177821	1.75002	59	254	7	20346	ENSMUSG00000004885	ENSMUSG00000053279	ENSMUSG00000046402	ENSMUSG00000032454	ENSMUSG00000074207	ENSMUSG00000029134	ENSMUSG00000030747
GO:BP	epoxide metabolic process	GO:0097176	0.0199327	1.70043	4	274	3	20346	ENSMUSG00000022040	ENSMUSG00000000320	ENSMUSG00000037577
GO:BP	regulation of defense response	GO:0031347	0.0199664	1.6997	579	794	45	20346	ENSMUSG00000030107	ENSMUSG00000061762	ENSMUSG00000022383	ENSMUSG00000046834	ENSMUSG00000037362	ENSMUSG00000026535	ENSMUSG00000027347	ENSMUSG00000036273	ENSMUSG00000030793	ENSMUSG00000027639	ENSMUSG00000001123	ENSMUSG00000032238	ENSMUSG00000060477	ENSMUSG00000018899	ENSMUSG00000044594	ENSMUSG00000039208	ENSMUSG00000021025	ENSMUSG00000042244	ENSMUSG00000041939	ENSMUSG00000041135	ENSMUSG00000032193	ENSMUSG00000031558	ENSMUSG00000025473	ENSMUSG00000027298	ENSMUSG00000045573	ENSMUSG00000056071	ENSMUSG00000033174	ENSMUSG00000039942	ENSMUSG00000025779	ENSMUSG00000038576	ENSMUSG00000029380	ENSMUSG00000039384	ENSMUSG00000027995	ENSMUSG00000024659	ENSMUSG00000006519	ENSMUSG00000001348	ENSMUSG00000030157	ENSMUSG00000038037	ENSMUSG00000032420	ENSMUSG00000044244	ENSMUSG00000037321
GO:BP	lymphocyte migration	GO:0072676	0.020278	1.69298	81	542	11	20346	ENSMUSG00000021508	ENSMUSG00000058022	ENSMUSG00000030793	ENSMUSG00000059456	ENSMUSG00000001123	ENSMUSG00000028539	ENSMUSG00000096001	ENSMUSG00000025473	ENSMUSG00000034855	ENSMUSG00000026166	ENSMUSG00000042289
GO:BP	N-acetylneuraminate metabolic process	GO:0006054	0.0208708	1.68046	11	617	5	20346	ENSMUSG00000042684	ENSMUSG00000034744	ENSMUSG00000013846	ENSMUSG00000028479	ENSMUSG00000031387
GO:BP	angiogenesis	GO:0001525	0.0210055	1.67767	507	1025	49	20346	ENSMUSG00000002633	ENSMUSG00000024109	ENSMUSG00000058022	ENSMUSG00000023886	ENSMUSG00000016918	ENSMUSG00000050295	ENSMUSG00000021281	ENSMUSG00000037362	ENSMUSG00000022018	ENSMUSG00000022469	ENSMUSG00000059456	ENSMUSG00000032238	ENSMUSG00000030790	ENSMUSG00000002289	ENSMUSG00000020717	ENSMUSG00000035273	ENSMUSG00000064246	ENSMUSG00000057315	ENSMUSG00000026473	ENSMUSG00000021457	ENSMUSG00000022893	ENSMUSG00000039062	ENSMUSG00000010660	ENSMUSG00000031558	ENSMUSG00000025473	ENSMUSG00000006445	ENSMUSG00000034855	ENSMUSG00000045216	ENSMUSG00000024486	ENSMUSG00000021701	ENSMUSG00000024659	ENSMUSG00000001240	ENSMUSG00000004951	ENSMUSG00000032231	ENSMUSG00000021367	ENSMUSG00000022382	ENSMUSG00000032679	ENSMUSG00000038650	ENSMUSG00000046318	ENSMUSG00000020160	ENSMUSG00000074272
GO:BP	carbohydrate metabolic process	GO:0005975	0.0224291	1.64919	534	975	49	20346	ENSMUSG00000021456	ENSMUSG00000046794	ENSMUSG00000042684	ENSMUSG00000022383	ENSMUSG00000059456	ENSMUSG00000028893	ENSMUSG00000037025	ENSMUSG00000030747	ENSMUSG00000079644	ENSMUSG00000027533	ENSMUSG00000026185	ENSMUSG00000034744	ENSMUSG00000032238	ENSMUSG00000062908	ENSMUSG00000019528	ENSMUSG00000036395	ENSMUSG00000064246	ENSMUSG00000025791	ENSMUSG00000032648	ENSMUSG00000025059	ENSMUSG00000010660	ENSMUSG00000027227	ENSMUSG00000037940	ENSMUSG00000062646	ENSMUSG00000028479	ENSMUSG00000017390	ENSMUSG00000025950	ENSMUSG00000039942	ENSMUSG00000024525	ENSMUSG00000035473	ENSMUSG00000032591	ENSMUSG00000025068	ENSMUSG00000024892	ENSMUSG00000047963	ENSMUSG00000041440	ENSMUSG00000028961	ENSMUSG00000038894	ENSMUSG00000031910	ENSMUSG00000029162	ENSMUSG00000028573	ENSMUSG00000000708
GO:BP	regulation of cellular ketone metabolic process	GO:0010565	0.0225597	1.64667	123	922	18	20346	ENSMUSG00000010175	ENSMUSG00000022383	ENSMUSG00000028341	ENSMUSG00000030747	ENSMUSG00000027533	ENSMUSG00000032715	ENSMUSG00000047443	ENSMUSG00000024378	ENSMUSG00000030792	ENSMUSG00000045294	ENSMUSG00000025059	ENSMUSG00000031483	ENSMUSG00000024659	ENSMUSG00000025198	ENSMUSG00000038894	ENSMUSG00000074272	ENSMUSG00000031278	ENSMUSG00000030659
GO:BP	response to extracellular stimulus	GO:0009991	0.0239541	1.62062	520	443	28	20346	ENSMUSG00000010175	ENSMUSG00000046402	ENSMUSG00000028393	ENSMUSG00000020407	ENSMUSG00000033308	ENSMUSG00000020635	ENSMUSG00000037035	ENSMUSG00000022383	ENSMUSG00000036273	ENSMUSG00000026879	ENSMUSG00000021565	ENSMUSG00000054612	ENSMUSG00000028893	ENSMUSG00000037025	ENSMUSG00000024331	ENSMUSG00000024778	ENSMUSG00000053846	ENSMUSG00000062908	ENSMUSG00000002289	ENSMUSG00000073802	ENSMUSG00000024912	ENSMUSG00000026473	ENSMUSG00000009772	ENSMUSG00000025372	ENSMUSG00000032193	ENSMUSG00000071369	ENSMUSG00000027227	ENSMUSG00000018796
GO:BP	cellular carbohydrate metabolic process	GO:0044262	0.0241261	1.61751	273	849	28	20346	ENSMUSG00000046794	ENSMUSG00000022383	ENSMUSG00000059456	ENSMUSG00000028893	ENSMUSG00000037025	ENSMUSG00000030747	ENSMUSG00000026185	ENSMUSG00000034744	ENSMUSG00000032238	ENSMUSG00000062908	ENSMUSG00000019528	ENSMUSG00000032648	ENSMUSG00000025059	ENSMUSG00000010660	ENSMUSG00000027227	ENSMUSG00000037940	ENSMUSG00000028479	ENSMUSG00000025950	ENSMUSG00000024525	ENSMUSG00000032591	ENSMUSG00000047963	ENSMUSG00000041440	ENSMUSG00000028961	ENSMUSG00000038894	ENSMUSG00000031910	ENSMUSG00000029162	ENSMUSG00000028573	ENSMUSG00000000708
GO:BP	regulation of cell population proliferation	GO:0042127	0.0245028	1.61078	1623	1025	120	20346	ENSMUSG00000002633	ENSMUSG00000025491	ENSMUSG00000010175	ENSMUSG00000035158	ENSMUSG00000020140	ENSMUSG00000017491	ENSMUSG00000059668	ENSMUSG00000049107	ENSMUSG00000029322	ENSMUSG00000016918	ENSMUSG00000051367	ENSMUSG00000025407	ENSMUSG00000047143	ENSMUSG00000022330	ENSMUSG00000061762	ENSMUSG00000029378	ENSMUSG00000028749	ENSMUSG00000037362	ENSMUSG00000036273	ENSMUSG00000021466	ENSMUSG00000030793	ENSMUSG00000022018	ENSMUSG00000000320	ENSMUSG00000018569	ENSMUSG00000059456	ENSMUSG00000028341	ENSMUSG00000024778	ENSMUSG00000001123	ENSMUSG00000000732	ENSMUSG00000035000	ENSMUSG00000026185	ENSMUSG00000022218	ENSMUSG00000048482	ENSMUSG00000027210	ENSMUSG00000030790	ENSMUSG00000018899	ENSMUSG00000042207	ENSMUSG00000022996	ENSMUSG00000035273	ENSMUSG00000073802	ENSMUSG00000028019
GO:BP	regulation of steroid biosynthetic process	GO:0050810	0.0250079	1.60192	73	503	10	20346	ENSMUSG00000010175	ENSMUSG00000033520	ENSMUSG00000021148	ENSMUSG00000003555	ENSMUSG00000024378	ENSMUSG00000030792	ENSMUSG00000058454	ENSMUSG00000045294	ENSMUSG00000031483	ENSMUSG00000059743
GO:BP	chemotaxis	GO:0006935	0.0254316	1.59463	520	494	30	20346	ENSMUSG00000002633	ENSMUSG00000025876	ENSMUSG00000021508	ENSMUSG00000046354	ENSMUSG00000049107	ENSMUSG00000023913	ENSMUSG00000023886	ENSMUSG00000028289	ENSMUSG00000041012	ENSMUSG00000045136	ENSMUSG00000037362	ENSMUSG00000021466	ENSMUSG00000059456	ENSMUSG00000039115	ENSMUSG00000028341	ENSMUSG00000001123	ENSMUSG00000037868	ENSMUSG00000028539	ENSMUSG00000032380	ENSMUSG00000096001	ENSMUSG00000048482	ENSMUSG00000020902	ENSMUSG00000021457	ENSMUSG00000031558	ENSMUSG00000025473	ENSMUSG00000006445	ENSMUSG00000056071	ENSMUSG00000039145	ENSMUSG00000034855	ENSMUSG00000026166
GO:BP	retinoic acid biosynthetic process	GO:0002138	0.0257306	1.58955	13	73	3	20346	ENSMUSG00000004885	ENSMUSG00000053279	ENSMUSG00000046402
GO:BP	diterpenoid biosynthetic process	GO:0016102	0.0257306	1.58955	13	73	3	20346	ENSMUSG00000004885	ENSMUSG00000053279	ENSMUSG00000046402
GO:BP	regulation of water loss via skin	GO:0033561	0.0260527	1.58415	21	826	7	20346	ENSMUSG00000022512	ENSMUSG00000046834	ENSMUSG00000000320	ENSMUSG00000047501	ENSMUSG00000037188	ENSMUSG00000028048	ENSMUSG00000001420
GO:BP	negative regulation of natural killer cell mediated immunity	GO:0002716	0.026755	1.5726	19	932	7	20346	ENSMUSG00000001123	ENSMUSG00000044594	ENSMUSG00000030157	ENSMUSG00000037321	ENSMUSG00000067212	ENSMUSG00000074272	ENSMUSG00000024339
GO:BP	response to drug	GO:0042493	0.0268934	1.57035	1012	475	46	20346	ENSMUSG00000030307	ENSMUSG00000002633	ENSMUSG00000039683	ENSMUSG00000053279	ENSMUSG00000028393	ENSMUSG00000061762	ENSMUSG00000028494	ENSMUSG00000033308	ENSMUSG00000020635	ENSMUSG00000029378	ENSMUSG00000074207	ENSMUSG00000069917	ENSMUSG00000022512	ENSMUSG00000022383	ENSMUSG00000036273	ENSMUSG00000027463	ENSMUSG00000021466	ENSMUSG00000069919	ENSMUSG00000026879	ENSMUSG00000030287	ENSMUSG00000054612	ENSMUSG00000052305	ENSMUSG00000018569	ENSMUSG00000059456	ENSMUSG00000032348	ENSMUSG00000028341	ENSMUSG00000013766	ENSMUSG00000020847	ENSMUSG00000048482	ENSMUSG00000073987	ENSMUSG00000028713	ENSMUSG00000046352	ENSMUSG00000024912	ENSMUSG00000021025	ENSMUSG00000025372	ENSMUSG00000041135	ENSMUSG00000025059	ENSMUSG00000031558	ENSMUSG00000071369	ENSMUSG00000027227	ENSMUSG00000018796
GO:BP	taxis	GO:0042330	0.0273722	1.56269	522	494	30	20346	ENSMUSG00000002633	ENSMUSG00000025876	ENSMUSG00000021508	ENSMUSG00000046354	ENSMUSG00000049107	ENSMUSG00000023913	ENSMUSG00000023886	ENSMUSG00000028289	ENSMUSG00000041012	ENSMUSG00000045136	ENSMUSG00000037362	ENSMUSG00000021466	ENSMUSG00000059456	ENSMUSG00000039115	ENSMUSG00000028341	ENSMUSG00000001123	ENSMUSG00000037868	ENSMUSG00000028539	ENSMUSG00000032380	ENSMUSG00000096001	ENSMUSG00000048482	ENSMUSG00000020902	ENSMUSG00000021457	ENSMUSG00000031558	ENSMUSG00000025473	ENSMUSG00000006445	ENSMUSG00000056071	ENSMUSG00000039145	ENSMUSG00000034855	ENSMUSG00000026166
GO:BP	regulation of lymphocyte migration	GO:2000401	0.0279534	1.55357	60	494	9	20346	ENSMUSG00000021508	ENSMUSG00000058022	ENSMUSG00000030793	ENSMUSG00000059456	ENSMUSG00000001123	ENSMUSG00000096001	ENSMUSG00000025473	ENSMUSG00000034855	ENSMUSG00000026166
GO:BP	retinoic acid metabolic process	GO:0042573	0.0288928	1.53921	22	139	4	20346	ENSMUSG00000004885	ENSMUSG00000053279	ENSMUSG00000046402	ENSMUSG00000074207
GO:BP	regulation of lipid biosynthetic process	GO:0046890	0.0309322	1.50959	170	675	18	20346	ENSMUSG00000010175	ENSMUSG00000033520	ENSMUSG00000021148	ENSMUSG00000030747	ENSMUSG00000027533	ENSMUSG00000032715	ENSMUSG00000003555	ENSMUSG00000024378	ENSMUSG00000030792	ENSMUSG00000058454	ENSMUSG00000045294	ENSMUSG00000032193	ENSMUSG00000031483	ENSMUSG00000059743	ENSMUSG00000025950	ENSMUSG00000025277	ENSMUSG00000024659	ENSMUSG00000025198
GO:BP	negative regulation of lymphocyte mediated immunity	GO:0002707	0.0311863	1.50604	42	932	10	20346	ENSMUSG00000001123	ENSMUSG00000044594	ENSMUSG00000069255	ENSMUSG00000038576	ENSMUSG00000030157	ENSMUSG00000044244	ENSMUSG00000037321	ENSMUSG00000067212	ENSMUSG00000074272	ENSMUSG00000024339
GO:BP	response to lipid	GO:0033993	0.0313831	1.5033	921	653	54	20346	ENSMUSG00000031844	ENSMUSG00000017491	ENSMUSG00000044748	ENSMUSG00000046402	ENSMUSG00000058022	ENSMUSG00000028393	ENSMUSG00000037161	ENSMUSG00000026981	ENSMUSG00000061762	ENSMUSG00000037035	ENSMUSG00000029378	ENSMUSG00000074207	ENSMUSG00000022512	ENSMUSG00000044041	ENSMUSG00000022383	ENSMUSG00000021466	ENSMUSG00000030793	ENSMUSG00000000320	ENSMUSG00000059456	ENSMUSG00000028341	ENSMUSG00000024778	ENSMUSG00000030747	ENSMUSG00000001123	ENSMUSG00000048482	ENSMUSG00000032238	ENSMUSG00000030790	ENSMUSG00000060477	ENSMUSG00000046352	ENSMUSG00000024912	ENSMUSG00000022037	ENSMUSG00000021025	ENSMUSG00000045294	ENSMUSG00000041135	ENSMUSG00000040181	ENSMUSG00000032193	ENSMUSG00000031558	ENSMUSG00000018796	ENSMUSG00000047501	ENSMUSG00000021591	ENSMUSG00000045573	ENSMUSG00000034855
GO:BP	drug catabolic process	GO:0042737	0.0316891	1.49909	86	750	13	20346	ENSMUSG00000029695	ENSMUSG00000033308	ENSMUSG00000074207	ENSMUSG00000042684	ENSMUSG00000034744	ENSMUSG00000028713	ENSMUSG00000075296	ENSMUSG00000006378	ENSMUSG00000030630	ENSMUSG00000055301	ENSMUSG00000031387	ENSMUSG00000032420	ENSMUSG00000024747
GO:BP	response to alcohol	GO:0097305	0.0320894	1.49364	253	213	12	20346	ENSMUSG00000002633	ENSMUSG00000053279	ENSMUSG00000028393	ENSMUSG00000037035	ENSMUSG00000074207	ENSMUSG00000022512	ENSMUSG00000021466	ENSMUSG00000026879	ENSMUSG00000030287	ENSMUSG00000054612	ENSMUSG00000018569	ENSMUSG00000059456
GO:BP	positive regulation of nervous system development	GO:0051962	0.0322175	1.49191	602	286	23	20346	ENSMUSG00000002633	ENSMUSG00000010175	ENSMUSG00000004885	ENSMUSG00000024109	ENSMUSG00000017491	ENSMUSG00000049107	ENSMUSG00000027500	ENSMUSG00000043924	ENSMUSG00000025407	ENSMUSG00000047143	ENSMUSG00000025432	ENSMUSG00000029602	ENSMUSG00000020635	ENSMUSG00000045136	ENSMUSG00000032064	ENSMUSG00000045871	ENSMUSG00000052087	ENSMUSG00000059456	ENSMUSG00000037025	ENSMUSG00000028184	ENSMUSG00000060780	ENSMUSG00000061751	ENSMUSG00000048482
GO:BP	positive regulation of striated muscle cell differentiation	GO:0051155	0.033902	1.46977	80	13	3	20346	ENSMUSG00000002633	ENSMUSG00000055027	ENSMUSG00000010175
GO:BP	cell adhesion	GO:0007155	0.0359112	1.44477	1220	1003	93	20346	ENSMUSG00000002633	ENSMUSG00000036466	ENSMUSG00000024109	ENSMUSG00000039683	ENSMUSG00000058022	ENSMUSG00000023886	ENSMUSG00000028289	ENSMUSG00000016918	ENSMUSG00000026981	ENSMUSG00000028749	ENSMUSG00000022512	ENSMUSG00000022383	ENSMUSG00000037362	ENSMUSG00000027347	ENSMUSG00000055976	ENSMUSG00000021338	ENSMUSG00000026879	ENSMUSG00000030793	ENSMUSG00000022018	ENSMUSG00000000320	ENSMUSG00000018569	ENSMUSG00000059456	ENSMUSG00000039115	ENSMUSG00000028341	ENSMUSG00000024331	ENSMUSG00000069441	ENSMUSG00000001123	ENSMUSG00000000732	ENSMUSG00000035000	ENSMUSG00000053062	ENSMUSG00000018899	ENSMUSG00000020717	ENSMUSG00000035273	ENSMUSG00000069255	ENSMUSG00000020902	ENSMUSG00000021457	ENSMUSG00000041135	ENSMUSG00000031558	ENSMUSG00000032068	ENSMUSG00000047501	ENSMUSG00000025473
GO:BP	mammary gland morphogenesis	GO:0060443	0.0364613	1.43817	50	470	8	20346	ENSMUSG00000029378	ENSMUSG00000003051	ENSMUSG00000021466	ENSMUSG00000026185	ENSMUSG00000042207	ENSMUSG00000020902	ENSMUSG00000031558	ENSMUSG00000006445
GO:BP	negative regulation of cell communication	GO:0010648	0.0379653	1.42061	1261	804	80	20346	ENSMUSG00000002633	ENSMUSG00000024526	ENSMUSG00000020218	ENSMUSG00000032841	ENSMUSG00000022598	ENSMUSG00000016918	ENSMUSG00000025407	ENSMUSG00000042988	ENSMUSG00000026981	ENSMUSG00000029602	ENSMUSG00000020635	ENSMUSG00000037035	ENSMUSG00000037362	ENSMUSG00000042249	ENSMUSG00000057719	ENSMUSG00000036273	ENSMUSG00000021466	ENSMUSG00000030793	ENSMUSG00000027639	ENSMUSG00000052087	ENSMUSG00000059456	ENSMUSG00000028893	ENSMUSG00000013766	ENSMUSG00000040856	ENSMUSG00000020847	ENSMUSG00000061751	ENSMUSG00000026185	ENSMUSG00000048482	ENSMUSG00000032238	ENSMUSG00000030790	ENSMUSG00000018899	ENSMUSG00000031488	ENSMUSG00000030792	ENSMUSG00000022037	ENSMUSG00000057315	ENSMUSG00000021025	ENSMUSG00000045294	ENSMUSG00000069255	ENSMUSG00000046223	ENSMUSG00000036880	ENSMUSG00000026983
GO:BP	regulation of synapse assembly	GO:0051963	0.0392938	1.40568	106	286	9	20346	ENSMUSG00000024109	ENSMUSG00000025582	ENSMUSG00000028289	ENSMUSG00000051367	ENSMUSG00000045871	ENSMUSG00000026304	ENSMUSG00000028184	ENSMUSG00000060780	ENSMUSG00000048482
GO:BP	negative regulation of proteolysis	GO:0045861	0.0408967	1.38831	354	392	20	20346	ENSMUSG00000002633	ENSMUSG00000071562	ENSMUSG00000071561	ENSMUSG00000022871	ENSMUSG00000079594	ENSMUSG00000044734	ENSMUSG00000034339	ENSMUSG00000028393	ENSMUSG00000034362	ENSMUSG00000026535	ENSMUSG00000036273	ENSMUSG00000062345	ENSMUSG00000054905	ENSMUSG00000074093	ENSMUSG00000044594	ENSMUSG00000059956	ENSMUSG00000027315	ENSMUSG00000031214	ENSMUSG00000005054	ENSMUSG00000046223
GO:BP	regulation of peptidase activity	GO:0052547	0.0416855	1.38001	435	546	28	20346	ENSMUSG00000071562	ENSMUSG00000071561	ENSMUSG00000022871	ENSMUSG00000079594	ENSMUSG00000044734	ENSMUSG00000034339	ENSMUSG00000028289	ENSMUSG00000034362	ENSMUSG00000026535	ENSMUSG00000026879	ENSMUSG00000030793	ENSMUSG00000054612	ENSMUSG00000000320	ENSMUSG00000024778	ENSMUSG00000062345	ENSMUSG00000054905	ENSMUSG00000044594	ENSMUSG00000059956	ENSMUSG00000027315	ENSMUSG00000005054	ENSMUSG00000046223	ENSMUSG00000041135	ENSMUSG00000071369	ENSMUSG00000024521	ENSMUSG00000056071	ENSMUSG00000074637	ENSMUSG00000015357	ENSMUSG00000034926
GO:BP	negative regulation of signaling	GO:0023057	0.0424414	1.37221	1265	804	80	20346	ENSMUSG00000002633	ENSMUSG00000024526	ENSMUSG00000020218	ENSMUSG00000032841	ENSMUSG00000022598	ENSMUSG00000016918	ENSMUSG00000025407	ENSMUSG00000042988	ENSMUSG00000026981	ENSMUSG00000029602	ENSMUSG00000020635	ENSMUSG00000037035	ENSMUSG00000037362	ENSMUSG00000042249	ENSMUSG00000057719	ENSMUSG00000036273	ENSMUSG00000021466	ENSMUSG00000030793	ENSMUSG00000027639	ENSMUSG00000052087	ENSMUSG00000059456	ENSMUSG00000028893	ENSMUSG00000013766	ENSMUSG00000040856	ENSMUSG00000020847	ENSMUSG00000061751	ENSMUSG00000026185	ENSMUSG00000048482	ENSMUSG00000032238	ENSMUSG00000030790	ENSMUSG00000018899	ENSMUSG00000031488	ENSMUSG00000030792	ENSMUSG00000022037	ENSMUSG00000057315	ENSMUSG00000021025	ENSMUSG00000045294	ENSMUSG00000069255	ENSMUSG00000046223	ENSMUSG00000036880	ENSMUSG00000026983
GO:BP	sensory organ development	GO:0007423	0.0434051	1.36246	561	152	15	20346	ENSMUSG00000002633	ENSMUSG00000010175	ENSMUSG00000036466	ENSMUSG00000035158	ENSMUSG00000020140	ENSMUSG00000039683	ENSMUSG00000021508	ENSMUSG00000017491	ENSMUSG00000053279	ENSMUSG00000051367	ENSMUSG00000035305	ENSMUSG00000022330	ENSMUSG00000037035	ENSMUSG00000050295	ENSMUSG00000044041
GO:BP	tongue development	GO:0043586	0.0449089	1.34767	22	326	5	20346	ENSMUSG00000002633	ENSMUSG00000051367	ENSMUSG00000044041	ENSMUSG00000048482	ENSMUSG00000022996
GO:BP	developmental growth	GO:0048589	0.0454205	1.34275	682	827	51	20346	ENSMUSG00000002633	ENSMUSG00000010175	ENSMUSG00000004885	ENSMUSG00000017491	ENSMUSG00000029322	ENSMUSG00000028289	ENSMUSG00000051367	ENSMUSG00000070644	ENSMUSG00000025407	ENSMUSG00000029602	ENSMUSG00000029378	ENSMUSG00000050295	ENSMUSG00000022383	ENSMUSG00000037362	ENSMUSG00000021466	ENSMUSG00000026879	ENSMUSG00000045871	ENSMUSG00000048482	ENSMUSG00000030790	ENSMUSG00000042207	ENSMUSG00000022996	ENSMUSG00000029217	ENSMUSG00000058454	ENSMUSG00000020902	ENSMUSG00000039007	ENSMUSG00000031558	ENSMUSG00000037211	ENSMUSG00000031661	ENSMUSG00000059743	ENSMUSG00000074637	ENSMUSG00000026819	ENSMUSG00000033174	ENSMUSG00000039942	ENSMUSG00000024486	ENSMUSG00000066595	ENSMUSG00000039384	ENSMUSG00000027859	ENSMUSG00000024659	ENSMUSG00000004771	ENSMUSG00000043811	ENSMUSG00000026383
GO:BP	tongue morphogenesis	GO:0043587	0.0464015	1.33347	8	152	3	20346	ENSMUSG00000002633	ENSMUSG00000051367	ENSMUSG00000044041
GO:BP	regulation of cellular component biogenesis	GO:0044087	0.0466213	1.33142	858	927	66	20346	ENSMUSG00000010175	ENSMUSG00000024109	ENSMUSG00000025582	ENSMUSG00000027500	ENSMUSG00000028289	ENSMUSG00000051367	ENSMUSG00000061762	ENSMUSG00000025432	ENSMUSG00000022512	ENSMUSG00000028943	ENSMUSG00000021338	ENSMUSG00000036273	ENSMUSG00000026879	ENSMUSG00000045871	ENSMUSG00000026304	ENSMUSG00000030793	ENSMUSG00000022018	ENSMUSG00000022469	ENSMUSG00000018569	ENSMUSG00000059456	ENSMUSG00000016758	ENSMUSG00000028184	ENSMUSG00000024778	ENSMUSG00000060780	ENSMUSG00000048482	ENSMUSG00000029581	ENSMUSG00000074093	ENSMUSG00000022996	ENSMUSG00000020717	ENSMUSG00000022037	ENSMUSG00000057315	ENSMUSG00000069255	ENSMUSG00000031558	ENSMUSG00000006445	ENSMUSG00000039529	ENSMUSG00000005483	ENSMUSG00000021573	ENSMUSG00000042099	ENSMUSG00000025555	ENSMUSG00000035064	ENSMUSG00000039942
GO:BP	negative regulation of inflammatory response	GO:0050728	0.0476126	1.32228	139	697	16	20346	ENSMUSG00000022383	ENSMUSG00000046834	ENSMUSG00000037362	ENSMUSG00000030793	ENSMUSG00000001123	ENSMUSG00000032238	ENSMUSG00000039208	ENSMUSG00000041939	ENSMUSG00000032193	ENSMUSG00000031558	ENSMUSG00000027298	ENSMUSG00000039942	ENSMUSG00000039384	ENSMUSG00000001348	ENSMUSG00000032420	ENSMUSG00000044244
GO:BP	epidermal cell differentiation	GO:0009913	0.0477176	1.32132	176	673	18	20346	ENSMUSG00000028681	ENSMUSG00000029671	ENSMUSG00000045539	ENSMUSG00000025407	ENSMUSG00000050295	ENSMUSG00000021466	ENSMUSG00000045871	ENSMUSG00000050359	ENSMUSG00000022218	ENSMUSG00000005355	ENSMUSG00000063651	ENSMUSG00000022123	ENSMUSG00000034282	ENSMUSG00000006445	ENSMUSG00000003271	ENSMUSG00000035557	ENSMUSG00000024659	ENSMUSG00000033088
GO:BP	regulation of immune system process	GO:0002682	0.048505	1.31421	1207	1008	92	20346	ENSMUSG00000002633	ENSMUSG00000035158	ENSMUSG00000021508	ENSMUSG00000023913	ENSMUSG00000046402	ENSMUSG00000058022	ENSMUSG00000028386	ENSMUSG00000061762	ENSMUSG00000050295	ENSMUSG00000028749	ENSMUSG00000046834	ENSMUSG00000037362	ENSMUSG00000026535	ENSMUSG00000027347	ENSMUSG00000036273	ENSMUSG00000026879	ENSMUSG00000030793	ENSMUSG00000027639	ENSMUSG00000022018	ENSMUSG00000059456	ENSMUSG00000028341	ENSMUSG00000024778	ENSMUSG00000001123	ENSMUSG00000000732	ENSMUSG00000035000	ENSMUSG00000032380	ENSMUSG00000096001	ENSMUSG00000027210	ENSMUSG00000032238	ENSMUSG00000060477	ENSMUSG00000045502	ENSMUSG00000018899	ENSMUSG00000044594	ENSMUSG00000020717	ENSMUSG00000029217	ENSMUSG00000038213	ENSMUSG00000021025	ENSMUSG00000022952	ENSMUSG00000069255	ENSMUSG00000042244	ENSMUSG00000021457
GO:BP	positive regulation of mesenchymal cell proliferation involved in ureter development	GO:2000729	0.0488296	1.31132	2	99	2	20346	ENSMUSG00000002633	ENSMUSG00000051367
GO:BP	terpenoid biosynthetic process	GO:0016114	0.0499931	1.30109	16	73	3	20346	ENSMUSG00000004885	ENSMUSG00000053279	ENSMUSG00000046402
				#REF!
[truncated: 206 more columns]

## Sheet: 1e GFP_Low_GO_Terms
1e: SOX2-GFP_Low GO Terms (biological processes)
source	term_name	term_id	adjusted_p_value	negative_log10_of_adjusted_p_value	term_size	query_size	intersection_size	effective_domain_size	intersections
GO:BP	anatomical structure morphogenesis	GO:0009653	1.87241e-24	23.7276	2466	915	228	20346	ENSMUSG00000033006	ENSMUSG00000024366	ENSMUSG00000031354	ENSMUSG00000026872	ENSMUSG00000027966	ENSMUSG00000047261	ENSMUSG00000037962	ENSMUSG00000045930	ENSMUSG00000026768	ENSMUSG00000064325	ENSMUSG00000045672	ENSMUSG00000021904	ENSMUSG00000031990	ENSMUSG00000020689	ENSMUSG00000042453	ENSMUSG00000027750	ENSMUSG00000031613	ENSMUSG00000042284	ENSMUSG00000021256	ENSMUSG00000001655	ENSMUSG00000026728	ENSMUSG00000059146	ENSMUSG00000019899	ENSMUSG00000028476	ENSMUSG00000024304	ENSMUSG00000042258	ENSMUSG00000002274	ENSMUSG00000031486	ENSMUSG00000035451	ENSMUSG00000038668	ENSMUSG00000055254	ENSMUSG00000029468	ENSMUSG00000015745	ENSMUSG00000029661	ENSMUSG00000026043	ENSMUSG00000001506	ENSMUSG00000031503	ENSMUSG00000061353	ENSMUSG00000028780	ENSMUSG00000039621	ENSMUSG00000056596
GO:BP	extracellular matrix organization	GO:0030198	3.22284e-22	21.4918	213	966	55	20346	ENSMUSG00000027966	ENSMUSG00000026768	ENSMUSG00000045672	ENSMUSG00000004098	ENSMUSG00000020689	ENSMUSG00000063765	ENSMUSG00000046618	ENSMUSG00000027750	ENSMUSG00000000693	ENSMUSG00000005397	ENSMUSG00000038463	ENSMUSG00000018830	ENSMUSG00000042961	ENSMUSG00000028476	ENSMUSG00000029661	ENSMUSG00000026043	ENSMUSG00000001506	ENSMUSG00000031502	ENSMUSG00000032035	ENSMUSG00000040998	ENSMUSG00000029207	ENSMUSG00000032289	ENSMUSG00000029675	ENSMUSG00000042116	ENSMUSG00000033149	ENSMUSG00000035258	ENSMUSG00000026837	ENSMUSG00000033327	ENSMUSG00000020473	ENSMUSG00000031342	ENSMUSG00000026042	ENSMUSG00000015850	ENSMUSG00000026814	ENSMUSG00000026574	ENSMUSG00000031273	ENSMUSG00000030022	ENSMUSG00000006800	ENSMUSG00000026478	ENSMUSG00000026479	ENSMUSG00000037032	ENSMUSG00000025213
GO:BP	system development	GO:0048731	9.06093e-21	20.0428	4449	915	331	20346	ENSMUSG00000052229	ENSMUSG00000033006	ENSMUSG00000031385	ENSMUSG00000024366	ENSMUSG00000031354	ENSMUSG00000047976	ENSMUSG00000015843	ENSMUSG00000031028	ENSMUSG00000056966	ENSMUSG00000019874	ENSMUSG00000020774	ENSMUSG00000056569	ENSMUSG00000022122	ENSMUSG00000026872	ENSMUSG00000027966	ENSMUSG00000044294	ENSMUSG00000059974	ENSMUSG00000047261	ENSMUSG00000037962	ENSMUSG00000020916	ENSMUSG00000045930	ENSMUSG00000026768	ENSMUSG00000022103	ENSMUSG00000064325	ENSMUSG00000045672	ENSMUSG00000021904	ENSMUSG00000011256	ENSMUSG00000031990	ENSMUSG00000020689	ENSMUSG00000090125	ENSMUSG00000042453	ENSMUSG00000063765	ENSMUSG00000031425	ENSMUSG00000027750	ENSMUSG00000000693	ENSMUSG00000009281	ENSMUSG00000019846	ENSMUSG00000005397	ENSMUSG00000018830	ENSMUSG00000031613	ENSMUSG00000042284
GO:BP	anatomical structure development	GO:0048856	1.27745e-20	19.8937	5394	915	380	20346	ENSMUSG00000052229	ENSMUSG00000033006	ENSMUSG00000031385	ENSMUSG00000024366	ENSMUSG00000031354	ENSMUSG00000047976	ENSMUSG00000030701	ENSMUSG00000040759	ENSMUSG00000015843	ENSMUSG00000031028	ENSMUSG00000056966	ENSMUSG00000019874	ENSMUSG00000027199	ENSMUSG00000020774	ENSMUSG00000056569	ENSMUSG00000022122	ENSMUSG00000026872	ENSMUSG00000027966	ENSMUSG00000044294	ENSMUSG00000059974	ENSMUSG00000047261	ENSMUSG00000037962	ENSMUSG00000020916	ENSMUSG00000045930	ENSMUSG00000026768	ENSMUSG00000022103	ENSMUSG00000064325	ENSMUSG00000045672	ENSMUSG00000021904	ENSMUSG00000011256	ENSMUSG00000031990	ENSMUSG00000020689	ENSMUSG00000090125	ENSMUSG00000042453	ENSMUSG00000063765	ENSMUSG00000031425	ENSMUSG00000027750	ENSMUSG00000000693	ENSMUSG00000009281	ENSMUSG00000019846	ENSMUSG00000005397
GO:BP	extracellular structure organization	GO:0043062	2.07515e-20	19.683	256	966	58	20346	ENSMUSG00000027966	ENSMUSG00000026768	ENSMUSG00000045672	ENSMUSG00000004098	ENSMUSG00000020689	ENSMUSG00000063765	ENSMUSG00000046618	ENSMUSG00000027750	ENSMUSG00000000693	ENSMUSG00000005397	ENSMUSG00000038463	ENSMUSG00000018830	ENSMUSG00000042961	ENSMUSG00000028476	ENSMUSG00000029661	ENSMUSG00000026043	ENSMUSG00000001506	ENSMUSG00000031502	ENSMUSG00000032035	ENSMUSG00000040998	ENSMUSG00000029207	ENSMUSG00000032289	ENSMUSG00000029675	ENSMUSG00000042116	ENSMUSG00000033149	ENSMUSG00000035258	ENSMUSG00000026837	ENSMUSG00000033327	ENSMUSG00000020473	ENSMUSG00000002985	ENSMUSG00000031342	ENSMUSG00000026042	ENSMUSG00000015850	ENSMUSG00000026814	ENSMUSG00000026574	ENSMUSG00000031273	ENSMUSG00000030022	ENSMUSG00000006800	ENSMUSG00000026478	ENSMUSG00000026479	ENSMUSG00000037032
GO:BP	multicellular organism development	GO:0007275	4.06771e-20	19.3906	4961	915	356	20346	ENSMUSG00000052229	ENSMUSG00000033006	ENSMUSG00000031385	ENSMUSG00000024366	ENSMUSG00000031354	ENSMUSG00000047976	ENSMUSG00000030701	ENSMUSG00000015843	ENSMUSG00000031028	ENSMUSG00000056966	ENSMUSG00000019874	ENSMUSG00000027199	ENSMUSG00000020774	ENSMUSG00000056569	ENSMUSG00000022122	ENSMUSG00000026872	ENSMUSG00000027966	ENSMUSG00000044294	ENSMUSG00000059974	ENSMUSG00000047261	ENSMUSG00000037962	ENSMUSG00000020916	ENSMUSG00000045930	ENSMUSG00000026768	ENSMUSG00000022103	ENSMUSG00000064325	ENSMUSG00000045672	ENSMUSG00000021904	ENSMUSG00000011256	ENSMUSG00000031990	ENSMUSG00000020689	ENSMUSG00000090125	ENSMUSG00000042453	ENSMUSG00000063765	ENSMUSG00000031425	ENSMUSG00000027750	ENSMUSG00000000693	ENSMUSG00000009281	ENSMUSG00000019846	ENSMUSG00000005397	ENSMUSG00000018830
GO:BP	cell adhesion	GO:0007155	6.18846e-20	19.2084	1220	874	132	20346	ENSMUSG00000031385	ENSMUSG00000047216	ENSMUSG00000031354	ENSMUSG00000025964	ENSMUSG00000056569	ENSMUSG00000059974	ENSMUSG00000026768	ENSMUSG00000039385	ENSMUSG00000068794	ENSMUSG00000021806	ENSMUSG00000004098	ENSMUSG00000011256	ENSMUSG00000038156	ENSMUSG00000031990	ENSMUSG00000020689	ENSMUSG00000042453	ENSMUSG00000027750	ENSMUSG00000000693	ENSMUSG00000005338	ENSMUSG00000030428	ENSMUSG00000019846	ENSMUSG00000005397	ENSMUSG00000028339	ENSMUSG00000037736	ENSMUSG00000042284	ENSMUSG00000050505	ENSMUSG00000053475	ENSMUSG00000022790	ENSMUSG00000019899	ENSMUSG00000042961	ENSMUSG00000024304	ENSMUSG00000025006	ENSMUSG00000026043	ENSMUSG00000001506	ENSMUSG00000061353	ENSMUSG00000039621	ENSMUSG00000032035	ENSMUSG00000023885	ENSMUSG00000037605	ENSMUSG00000026249	ENSMUSG00000040998
GO:BP	biological adhesion	GO:0022610	1.40924e-19	18.851	1231	874	132	20346	ENSMUSG00000031385	ENSMUSG00000047216	ENSMUSG00000031354	ENSMUSG00000025964	ENSMUSG00000056569	ENSMUSG00000059974	ENSMUSG00000026768	ENSMUSG00000039385	ENSMUSG00000068794	ENSMUSG00000021806	ENSMUSG00000004098	ENSMUSG00000011256	ENSMUSG00000038156	ENSMUSG00000031990	ENSMUSG00000020689	ENSMUSG00000042453	ENSMUSG00000027750	ENSMUSG00000000693	ENSMUSG00000005338	ENSMUSG00000030428	ENSMUSG00000019846	ENSMUSG00000005397	ENSMUSG00000028339	ENSMUSG00000037736	ENSMUSG00000042284	ENSMUSG00000050505	ENSMUSG00000053475	ENSMUSG00000022790	ENSMUSG00000019899	ENSMUSG00000042961	ENSMUSG00000024304	ENSMUSG00000025006	ENSMUSG00000026043	ENSMUSG00000001506	ENSMUSG00000061353	ENSMUSG00000039621	ENSMUSG00000032035	ENSMUSG00000023885	ENSMUSG00000037605	ENSMUSG00000026249	ENSMUSG00000040998
GO:BP	developmental process	GO:0032502	2.78492e-19	18.5552	5815	915	397	20346	ENSMUSG00000052229	ENSMUSG00000033006	ENSMUSG00000031385	ENSMUSG00000024366	ENSMUSG00000031354	ENSMUSG00000047976	ENSMUSG00000030701	ENSMUSG00000040759	ENSMUSG00000015843	ENSMUSG00000031028	ENSMUSG00000056966	ENSMUSG00000019874	ENSMUSG00000027199	ENSMUSG00000020774	ENSMUSG00000056569	ENSMUSG00000022122	ENSMUSG00000026872	ENSMUSG00000027966	ENSMUSG00000044294	ENSMUSG00000059974	ENSMUSG00000047261	ENSMUSG00000037962	ENSMUSG00000020916	ENSMUSG00000045930	ENSMUSG00000026768	ENSMUSG00000022103	ENSMUSG00000067613	ENSMUSG00000064325	ENSMUSG00000045672	ENSMUSG00000021904	ENSMUSG00000011256	ENSMUSG00000031990	ENSMUSG00000020689	ENSMUSG00000090125	ENSMUSG00000042453	ENSMUSG00000063765	ENSMUSG00000031425	ENSMUSG00000027750	ENSMUSG00000000693	ENSMUSG00000009281	ENSMUSG00000019846
GO:BP	cell-substrate adhesion	GO:0031589	1.6282e-17	16.7883	311	868	57	20346	ENSMUSG00000026768	ENSMUSG00000021806	ENSMUSG00000004098	ENSMUSG00000031990	ENSMUSG00000020689	ENSMUSG00000027750	ENSMUSG00000030428	ENSMUSG00000005397	ENSMUSG00000037736	ENSMUSG00000042284	ENSMUSG00000042961	ENSMUSG00000026043	ENSMUSG00000001506	ENSMUSG00000039621	ENSMUSG00000040998	ENSMUSG00000047793	ENSMUSG00000045103	ENSMUSG00000015533	ENSMUSG00000039546	ENSMUSG00000038453	ENSMUSG00000002900	ENSMUSG00000068220	ENSMUSG00000033149	ENSMUSG00000035258	ENSMUSG00000033985	ENSMUSG00000033327	ENSMUSG00000068196	ENSMUSG00000022885	ENSMUSG00000031342	ENSMUSG00000025082	ENSMUSG00000025314	ENSMUSG00000025810	ENSMUSG00000022548	ENSMUSG00000037712	ENSMUSG00000029053	ENSMUSG00000044447	ENSMUSG00000002808	ENSMUSG00000040690	ENSMUSG00000003518	ENSMUSG00000030022	ENSMUSG00000029528
GO:BP	tissue development	GO:0009888	5.91689e-15	14.2279	1802	911	162	20346	ENSMUSG00000033006	ENSMUSG00000031354	ENSMUSG00000022122	ENSMUSG00000026872	ENSMUSG00000027966	ENSMUSG00000044294	ENSMUSG00000047261	ENSMUSG00000037962	ENSMUSG00000020916	ENSMUSG00000026768	ENSMUSG00000064325	ENSMUSG00000045672	ENSMUSG00000020689	ENSMUSG00000090125	ENSMUSG00000063765	ENSMUSG00000027750	ENSMUSG00000000693	ENSMUSG00000018830	ENSMUSG00000001655	ENSMUSG00000026728	ENSMUSG00000059146	ENSMUSG00000024304	ENSMUSG00000042258	ENSMUSG00000019539	ENSMUSG00000035451	ENSMUSG00000031626	ENSMUSG00000029468	ENSMUSG00000026043	ENSMUSG00000001506	ENSMUSG00000031503	ENSMUSG00000061353	ENSMUSG00000024063	ENSMUSG00000028780	ENSMUSG00000060548	ENSMUSG00000031502	ENSMUSG00000075402	ENSMUSG00000075702	ENSMUSG00000038244	ENSMUSG00000017724	ENSMUSG00000026249	ENSMUSG00000040998
GO:BP	cell-matrix adhesion	GO:0007160	1.89422e-14	13.7226	192	868	41	20346	ENSMUSG00000026768	ENSMUSG00000021806	ENSMUSG00000004098	ENSMUSG00000031990	ENSMUSG00000020689	ENSMUSG00000027750	ENSMUSG00000005397	ENSMUSG00000037736	ENSMUSG00000042284	ENSMUSG00000026043	ENSMUSG00000040998	ENSMUSG00000047793	ENSMUSG00000045103	ENSMUSG00000015533	ENSMUSG00000039546	ENSMUSG00000033149	ENSMUSG00000033985	ENSMUSG00000033327	ENSMUSG00000031342	ENSMUSG00000025082	ENSMUSG00000025314	ENSMUSG00000025810	ENSMUSG00000022548	ENSMUSG00000037712	ENSMUSG00000029053	ENSMUSG00000002808	ENSMUSG00000040690	ENSMUSG00000003518	ENSMUSG00000030022	ENSMUSG00000029528	ENSMUSG00000031555	ENSMUSG00000029163	ENSMUSG00000048915	ENSMUSG00000020319	ENSMUSG00000031841	ENSMUSG00000016494	ENSMUSG00000029860	ENSMUSG00000020758	ENSMUSG00000031523	ENSMUSG00000019997	ENSMUSG00000026193
GO:BP	nervous system development	GO:0007399	1.54746e-13	12.8104	2172	915	181	20346	ENSMUSG00000052229	ENSMUSG00000033006	ENSMUSG00000031385	ENSMUSG00000024366	ENSMUSG00000047976	ENSMUSG00000015843	ENSMUSG00000056966	ENSMUSG00000019874	ENSMUSG00000020774	ENSMUSG00000056569	ENSMUSG00000022122	ENSMUSG00000026872	ENSMUSG00000059974	ENSMUSG00000047261	ENSMUSG00000026768	ENSMUSG00000022103	ENSMUSG00000064325	ENSMUSG00000021904	ENSMUSG00000031990	ENSMUSG00000090125	ENSMUSG00000042453	ENSMUSG00000031425	ENSMUSG00000027750	ENSMUSG00000000693	ENSMUSG00000042284	ENSMUSG00000036560	ENSMUSG00000026728	ENSMUSG00000059146	ENSMUSG00000019899	ENSMUSG00000035735	ENSMUSG00000024304	ENSMUSG00000042258	ENSMUSG00000002274	ENSMUSG00000031486	ENSMUSG00000035451	ENSMUSG00000038668	ENSMUSG00000055254	ENSMUSG00000026043	ENSMUSG00000061353	ENSMUSG00000028780	ENSMUSG00000039621
GO:BP	animal organ development	GO:0048513	1.87985e-13	12.7259	3299	915	245	20346	ENSMUSG00000033006	ENSMUSG00000031354	ENSMUSG00000047976	ENSMUSG00000031028	ENSMUSG00000019874	ENSMUSG00000022122	ENSMUSG00000026872	ENSMUSG00000027966	ENSMUSG00000044294	ENSMUSG00000037962	ENSMUSG00000020916	ENSMUSG00000026768	ENSMUSG00000064325	ENSMUSG00000045672	ENSMUSG00000011256	ENSMUSG00000031990	ENSMUSG00000020689	ENSMUSG00000090125	ENSMUSG00000042453	ENSMUSG00000063765	ENSMUSG00000000693	ENSMUSG00000009281	ENSMUSG00000005397	ENSMUSG00000018830	ENSMUSG00000031613	ENSMUSG00000021256	ENSMUSG00000001655	ENSMUSG00000026728	ENSMUSG00000059146	ENSMUSG00000027570	ENSMUSG00000024304	ENSMUSG00000042258	ENSMUSG00000019539	ENSMUSG00000029436	ENSMUSG00000035451	ENSMUSG00000038668	ENSMUSG00000031626	ENSMUSG00000055254	ENSMUSG00000029468	ENSMUSG00000029661	ENSMUSG00000026043
GO:BP	cell morphogenesis	GO:0000902	1.44171e-12	11.8411	911	913	98	20346	ENSMUSG00000024366	ENSMUSG00000026872	ENSMUSG00000047261	ENSMUSG00000026768	ENSMUSG00000021904	ENSMUSG00000020689	ENSMUSG00000042453	ENSMUSG00000027750	ENSMUSG00000042284	ENSMUSG00000026728	ENSMUSG00000059146	ENSMUSG00000019899	ENSMUSG00000024304	ENSMUSG00000042258	ENSMUSG00000002274	ENSMUSG00000038668	ENSMUSG00000055254	ENSMUSG00000029468	ENSMUSG00000015745	ENSMUSG00000061353	ENSMUSG00000028780	ENSMUSG00000039621	ENSMUSG00000025020	ENSMUSG00000005360	ENSMUSG00000017724	ENSMUSG00000029207	ENSMUSG00000056427	ENSMUSG00000055407	ENSMUSG00000045103	ENSMUSG00000027200	ENSMUSG00000052516	ENSMUSG00000026826	ENSMUSG00000031760	ENSMUSG00000032318	ENSMUSG00000038453	ENSMUSG00000002900	ENSMUSG00000032076	ENSMUSG00000022324	ENSMUSG00000027692	ENSMUSG00000006782	ENSMUSG00000015222
GO:BP	cell migration	GO:0016477	2.47872e-12	11.6058	1291	828	115	20346	ENSMUSG00000033006	ENSMUSG00000031385	ENSMUSG00000024366	ENSMUSG00000022122	ENSMUSG00000026872	ENSMUSG00000045930	ENSMUSG00000031990	ENSMUSG00000020689	ENSMUSG00000042453	ENSMUSG00000027750	ENSMUSG00000016024	ENSMUSG00000009281	ENSMUSG00000019846	ENSMUSG00000037736	ENSMUSG00000042284	ENSMUSG00000021256	ENSMUSG00000053475	ENSMUSG00000026728	ENSMUSG00000059146	ENSMUSG00000019899	ENSMUSG00000028476	ENSMUSG00000024304	ENSMUSG00000042258	ENSMUSG00000031486	ENSMUSG00000038668	ENSMUSG00000055254	ENSMUSG00000015745	ENSMUSG00000026043	ENSMUSG00000001506	ENSMUSG00000061353	ENSMUSG00000028780	ENSMUSG00000039621	ENSMUSG00000025020	ENSMUSG00000032035	ENSMUSG00000025089	ENSMUSG00000037605	ENSMUSG00000029207	ENSMUSG00000019929	ENSMUSG00000027200	ENSMUSG00000015533	ENSMUSG00000026826
GO:BP	regulation of multicellular organismal development	GO:2000026	2.83169e-12	11.548	2019	914	168	20346	ENSMUSG00000033006	ENSMUSG00000031385	ENSMUSG00000015843	ENSMUSG00000020774	ENSMUSG00000022122	ENSMUSG00000026872	ENSMUSG00000044294	ENSMUSG00000059974	ENSMUSG00000047261	ENSMUSG00000037962	ENSMUSG00000020916	ENSMUSG00000064325	ENSMUSG00000021904	ENSMUSG00000020689	ENSMUSG00000042453	ENSMUSG00000063765	ENSMUSG00000000693	ENSMUSG00000019846	ENSMUSG00000021256	ENSMUSG00000036560	ENSMUSG00000026728	ENSMUSG00000059146	ENSMUSG00000019899	ENSMUSG00000028476	ENSMUSG00000024304	ENSMUSG00000042258	ENSMUSG00000002274	ENSMUSG00000031486	ENSMUSG00000035451	ENSMUSG00000038668	ENSMUSG00000055254	ENSMUSG00000029468	ENSMUSG00000026043	ENSMUSG00000001506	ENSMUSG00000031503	ENSMUSG00000061353	ENSMUSG00000024063	ENSMUSG00000028780	ENSMUSG00000039621	ENSMUSG00000025020	ENSMUSG00000018217
GO:BP	cellular component morphogenesis	GO:0032989	2.89757e-12	11.538	1008	913	104	20346	ENSMUSG00000024366	ENSMUSG00000026872	ENSMUSG00000047261	ENSMUSG00000026768	ENSMUSG00000021904	ENSMUSG00000020689	ENSMUSG00000042453	ENSMUSG00000027750	ENSMUSG00000042284	ENSMUSG00000026728	ENSMUSG00000059146	ENSMUSG00000019899	ENSMUSG00000024304	ENSMUSG00000042258	ENSMUSG00000002274	ENSMUSG00000038668	ENSMUSG00000055254	ENSMUSG00000029468	ENSMUSG00000015745	ENSMUSG00000061353	ENSMUSG00000028780	ENSMUSG00000039621	ENSMUSG00000025020	ENSMUSG00000005360	ENSMUSG00000017724	ENSMUSG00000029207	ENSMUSG00000056427	ENSMUSG00000055407	ENSMUSG00000045103	ENSMUSG00000027200	ENSMUSG00000052516	ENSMUSG00000026826	ENSMUSG00000031760	ENSMUSG00000032318	ENSMUSG00000038453	ENSMUSG00000002900	ENSMUSG00000032118	ENSMUSG00000032076	ENSMUSG00000022324	ENSMUSG00000027692	ENSMUSG00000033149
GO:BP	cellular developmental process	GO:0048869	4.15677e-12	11.3812	4019	915	279	20346	ENSMUSG00000052229	ENSMUSG00000033006	ENSMUSG00000031385	ENSMUSG00000024366	ENSMUSG00000047976	ENSMUSG00000030701	ENSMUSG00000040759	ENSMUSG00000019874	ENSMUSG00000020774	ENSMUSG00000022122	ENSMUSG00000026872	ENSMUSG00000027966	ENSMUSG00000044294	ENSMUSG00000059974	ENSMUSG00000047261	ENSMUSG00000037962	ENSMUSG00000020916	ENSMUSG00000026768	ENSMUSG00000064325	ENSMUSG00000045672	ENSMUSG00000021904	ENSMUSG00000031990	ENSMUSG00000020689	ENSMUSG00000090125	ENSMUSG00000042453	ENSMUSG00000063765	ENSMUSG00000031425	ENSMUSG00000027750	ENSMUSG00000000693	ENSMUSG00000009281	ENSMUSG00000019846	ENSMUSG00000018830	ENSMUSG00000042284	ENSMUSG00000021256	ENSMUSG00000036560	ENSMUSG00000026728	ENSMUSG00000059146	ENSMUSG00000019899	ENSMUSG00000028476	ENSMUSG00000035735	ENSMUSG00000024304
GO:BP	regulation of developmental process	GO:0050793	4.68899e-12	11.3289	2581	914	200	20346	ENSMUSG00000033006	ENSMUSG00000031385	ENSMUSG00000030701	ENSMUSG00000040759	ENSMUSG00000015843	ENSMUSG00000020774	ENSMUSG00000022122	ENSMUSG00000026872	ENSMUSG00000044294	ENSMUSG00000059974	ENSMUSG00000047261	ENSMUSG00000037962	ENSMUSG00000020916	ENSMUSG00000064325	ENSMUSG00000021904	ENSMUSG00000020689	ENSMUSG00000042453	ENSMUSG00000063765	ENSMUSG00000027750	ENSMUSG00000000693	ENSMUSG00000009281	ENSMUSG00000019846	ENSMUSG00000021256	ENSMUSG00000036560	ENSMUSG00000026728	ENSMUSG00000059146	ENSMUSG00000019899	ENSMUSG00000028476	ENSMUSG00000024304	ENSMUSG00000042258	ENSMUSG00000002274	ENSMUSG00000031486	ENSMUSG00000035451	ENSMUSG00000038668	ENSMUSG00000055254	ENSMUSG00000029468	ENSMUSG00000015745	ENSMUSG00000026043	ENSMUSG00000001506	ENSMUSG00000031503	ENSMUSG00000061353
GO:BP	neurogenesis	GO:0022008	1.25417e-11	10.9016	1580	412	81	20346	ENSMUSG00000052229	ENSMUSG00000033006	ENSMUSG00000031385	ENSMUSG00000024366	ENSMUSG00000047976	ENSMUSG00000019874	ENSMUSG00000020774	ENSMUSG00000022122	ENSMUSG00000026872	ENSMUSG00000059974	ENSMUSG00000047261	ENSMUSG00000064325	ENSMUSG00000021904	ENSMUSG00000031990	ENSMUSG00000090125	ENSMUSG00000042453	ENSMUSG00000031425	ENSMUSG00000027750	ENSMUSG00000042284	ENSMUSG00000036560	ENSMUSG00000026728	ENSMUSG00000059146	ENSMUSG00000019899	ENSMUSG00000035735	ENSMUSG00000024304	ENSMUSG00000042258	ENSMUSG00000002274	ENSMUSG00000035451	ENSMUSG00000038668	ENSMUSG00000055254	ENSMUSG00000026043	ENSMUSG00000061353	ENSMUSG00000028780	ENSMUSG00000039621	ENSMUSG00000025020	ENSMUSG00000018217	ENSMUSG00000005360	ENSMUSG00000025089	ENSMUSG00000037605	ENSMUSG00000017724	ENSMUSG00000026249
GO:BP	cell morphogenesis involved in differentiation	GO:0000904	1.9287e-11	10.7147	654	836	73	20346	ENSMUSG00000024366	ENSMUSG00000026872	ENSMUSG00000047261	ENSMUSG00000026768	ENSMUSG00000021904	ENSMUSG00000020689	ENSMUSG00000042453	ENSMUSG00000027750	ENSMUSG00000026728	ENSMUSG00000059146	ENSMUSG00000019899	ENSMUSG00000024304	ENSMUSG00000042258	ENSMUSG00000002274	ENSMUSG00000055254	ENSMUSG00000061353	ENSMUSG00000028780	ENSMUSG00000039621	ENSMUSG00000025020	ENSMUSG00000005360	ENSMUSG00000017724	ENSMUSG00000029207	ENSMUSG00000056427	ENSMUSG00000055407	ENSMUSG00000027200	ENSMUSG00000052516	ENSMUSG00000026826	ENSMUSG00000031760	ENSMUSG00000032318	ENSMUSG00000038453	ENSMUSG00000002900	ENSMUSG00000022324	ENSMUSG00000027692	ENSMUSG00000006782	ENSMUSG00000015222	ENSMUSG00000022885	ENSMUSG00000002985	ENSMUSG00000044667	ENSMUSG00000035513	ENSMUSG00000025810	ENSMUSG00000000305
GO:BP	cell development	GO:0048468	2.12723e-11	10.6722	2087	897	167	20346	ENSMUSG00000033006	ENSMUSG00000031385	ENSMUSG00000024366	ENSMUSG00000020774	ENSMUSG00000022122	ENSMUSG00000026872	ENSMUSG00000027966	ENSMUSG00000059974	ENSMUSG00000047261	ENSMUSG00000037962	ENSMUSG00000026768	ENSMUSG00000045672	ENSMUSG00000021904	ENSMUSG00000031990	ENSMUSG00000020689	ENSMUSG00000090125	ENSMUSG00000042453	ENSMUSG00000031425	ENSMUSG00000027750	ENSMUSG00000018830	ENSMUSG00000042284	ENSMUSG00000036560	ENSMUSG00000026728	ENSMUSG00000059146	ENSMUSG00000019899	ENSMUSG00000028476	ENSMUSG00000024304	ENSMUSG00000042258	ENSMUSG00000002274	ENSMUSG00000031486	ENSMUSG00000035451	ENSMUSG00000038668	ENSMUSG00000031626	ENSMUSG00000055254	ENSMUSG00000026043	ENSMUSG00000061353	ENSMUSG00000028780	ENSMUSG00000039621	ENSMUSG00000025020	ENSMUSG00000018217	ENSMUSG00000005360
GO:BP	movement of cell or subcellular component	GO:0006928	2.96455e-11	10.528	1782	850	143	20346	ENSMUSG00000033006	ENSMUSG00000031385	ENSMUSG00000024366	ENSMUSG00000022122	ENSMUSG00000026872	ENSMUSG00000047261	ENSMUSG00000045930	ENSMUSG00000031990	ENSMUSG00000020689	ENSMUSG00000042453	ENSMUSG00000027750	ENSMUSG00000036570	ENSMUSG00000016024	ENSMUSG00000009281	ENSMUSG00000019846	ENSMUSG00000037736	ENSMUSG00000042284	ENSMUSG00000021256	ENSMUSG00000053475	ENSMUSG00000026728	ENSMUSG00000059146	ENSMUSG00000019899	ENSMUSG00000075284	ENSMUSG00000028476	ENSMUSG00000024304	ENSMUSG00000042258	ENSMUSG00000031486	ENSMUSG00000038668	ENSMUSG00000055254	ENSMUSG00000015745	ENSMUSG00000026043	ENSMUSG00000001506	ENSMUSG00000061353	ENSMUSG00000028780	ENSMUSG00000039621	ENSMUSG00000025020	ENSMUSG00000032035	ENSMUSG00000025089	ENSMUSG00000037605	ENSMUSG00000017724	ENSMUSG00000029207
GO:BP	tube development	GO:0035295	3.78865e-11	10.4215	1071	868	102	20346	ENSMUSG00000033006	ENSMUSG00000022122	ENSMUSG00000026872	ENSMUSG00000045930	ENSMUSG00000064325	ENSMUSG00000031990	ENSMUSG00000020689	ENSMUSG00000000693	ENSMUSG00000009281	ENSMUSG00000031613	ENSMUSG00000021256	ENSMUSG00000028476	ENSMUSG00000024304	ENSMUSG00000042258	ENSMUSG00000019539	ENSMUSG00000031486	ENSMUSG00000035451	ENSMUSG00000055254	ENSMUSG00000026043	ENSMUSG00000031503	ENSMUSG00000061353	ENSMUSG00000028780	ENSMUSG00000031502	ENSMUSG00000032035	ENSMUSG00000038244	ENSMUSG00000023885	ENSMUSG00000017724	ENSMUSG00000026249	ENSMUSG00000040998	ENSMUSG00000029563	ENSMUSG00000000120	ENSMUSG00000019929	ENSMUSG00000052516	ENSMUSG00000026494	ENSMUSG00000016128	ENSMUSG00000062713	ENSMUSG00000025934	ENSMUSG00000021469	ENSMUSG00000026640	ENSMUSG00000068196	ENSMUSG00000044674
GO:BP	cell projection organization	GO:0030030	3.82127e-11	10.4178	1391	921	127	20346	ENSMUSG00000031385	ENSMUSG00000024366	ENSMUSG00000026872	ENSMUSG00000059974	ENSMUSG00000047261	ENSMUSG00000026768	ENSMUSG00000021904	ENSMUSG00000031990	ENSMUSG00000020689	ENSMUSG00000042453	ENSMUSG00000031425	ENSMUSG00000027750	ENSMUSG00000030428	ENSMUSG00000042284	ENSMUSG00000026728	ENSMUSG00000059146	ENSMUSG00000019899	ENSMUSG00000024304	ENSMUSG00000042258	ENSMUSG00000002274	ENSMUSG00000038668	ENSMUSG00000055254	ENSMUSG00000029468	ENSMUSG00000015745	ENSMUSG00000061353	ENSMUSG00000028780	ENSMUSG00000039621	ENSMUSG00000025020	ENSMUSG00000018217	ENSMUSG00000025089	ENSMUSG00000017724	ENSMUSG00000026249	ENSMUSG00000029207	ENSMUSG00000056427	ENSMUSG00000040729	ENSMUSG00000055407	ENSMUSG00000045103	ENSMUSG00000027200	ENSMUSG00000015533	ENSMUSG00000052516	ENSMUSG00000026826
GO:BP	locomotion	GO:0040011	3.83813e-11	10.4159	1630	850	134	20346	ENSMUSG00000033006	ENSMUSG00000031385	ENSMUSG00000024366	ENSMUSG00000040759	ENSMUSG00000022122	ENSMUSG00000026872	ENSMUSG00000047261	ENSMUSG00000045930	ENSMUSG00000031990	ENSMUSG00000020689	ENSMUSG00000042453	ENSMUSG00000027750	ENSMUSG00000016024	ENSMUSG00000009281	ENSMUSG00000019846	ENSMUSG00000037736	ENSMUSG00000042284	ENSMUSG00000021256	ENSMUSG00000053475	ENSMUSG00000026728	ENSMUSG00000059146	ENSMUSG00000019899	ENSMUSG00000028476	ENSMUSG00000024304	ENSMUSG00000042258	ENSMUSG00000031486	ENSMUSG00000038668	ENSMUSG00000055254	ENSMUSG00000015745	ENSMUSG00000026043	ENSMUSG00000001506	ENSMUSG00000061353	ENSMUSG00000028780	ENSMUSG00000039621	ENSMUSG00000025020	ENSMUSG00000032035	ENSMUSG00000025089	ENSMUSG00000037605	ENSMUSG00000017724	ENSMUSG00000029207	ENSMUSG00000056427
GO:BP	cellular component organization	GO:0016043	3.86406e-11	10.413	5296	967	357	20346	ENSMUSG00000031385	ENSMUSG00000024366	ENSMUSG00000031354	ENSMUSG00000047976	ENSMUSG00000038077	ENSMUSG00000026872	ENSMUSG00000027966	ENSMUSG00000059974	ENSMUSG00000047261	ENSMUSG00000037962	ENSMUSG00000026768	ENSMUSG00000020297	ENSMUSG00000045672	ENSMUSG00000021904	ENSMUSG00000004098	ENSMUSG00000031990	ENSMUSG00000020689	ENSMUSG00000042453	ENSMUSG00000063765	ENSMUSG00000046618	ENSMUSG00000031425	ENSMUSG00000027750	ENSMUSG00000016024	ENSMUSG00000000693	ENSMUSG00000030428	ENSMUSG00000005397	ENSMUSG00000021567	ENSMUSG00000038463	ENSMUSG00000018830	ENSMUSG00000037736	ENSMUSG00000056870	ENSMUSG00000042284	ENSMUSG00000026728	ENSMUSG00000059146	ENSMUSG00000019899	ENSMUSG00000075284	ENSMUSG00000042961	ENSMUSG00000028476	ENSMUSG00000024304	ENSMUSG00000042258	ENSMUSG00000022419
GO:BP	generation of neurons	GO:0048699	5.03704e-11	10.2978	1469	461	82	20346	ENSMUSG00000033006	ENSMUSG00000031385	ENSMUSG00000024366	ENSMUSG00000047976	ENSMUSG00000020774	ENSMUSG00000022122	ENSMUSG00000026872	ENSMUSG00000059974	ENSMUSG00000047261	ENSMUSG00000064325	ENSMUSG00000021904	ENSMUSG00000031990	ENSMUSG00000042453	ENSMUSG00000031425	ENSMUSG00000027750	ENSMUSG00000042284	ENSMUSG00000036560	ENSMUSG00000026728	ENSMUSG00000059146	ENSMUSG00000019899	ENSMUSG00000035735	ENSMUSG00000024304	ENSMUSG00000042258	ENSMUSG00000002274	ENSMUSG00000035451	ENSMUSG00000038668	ENSMUSG00000055254	ENSMUSG00000026043	ENSMUSG00000061353	ENSMUSG00000028780	ENSMUSG00000039621	ENSMUSG00000025020	ENSMUSG00000018217	ENSMUSG00000005360	ENSMUSG00000025089	ENSMUSG00000037605	ENSMUSG00000017724	ENSMUSG00000026249	ENSMUSG00000040260	ENSMUSG00000029207	ENSMUSG00000056427
GO:BP	regulation of anatomical structure morphogenesis	GO:0022603	5.19042e-11	10.2848	1005	796	92	20346	ENSMUSG00000026872	ENSMUSG00000064325	ENSMUSG00000021904	ENSMUSG00000020689	ENSMUSG00000042453	ENSMUSG00000027750	ENSMUSG00000021256	ENSMUSG00000026728	ENSMUSG00000059146	ENSMUSG00000028476	ENSMUSG00000024304	ENSMUSG00000042258	ENSMUSG00000002274	ENSMUSG00000031486	ENSMUSG00000038668	ENSMUSG00000055254	ENSMUSG00000015745	ENSMUSG00000031503	ENSMUSG00000061353	ENSMUSG00000028780	ENSMUSG00000039621	ENSMUSG00000025020	ENSMUSG00000032035	ENSMUSG00000023885	ENSMUSG00000017724	ENSMUSG00000029563	ENSMUSG00000000120	ENSMUSG00000019929	ENSMUSG00000055407	ENSMUSG00000027200	ENSMUSG00000052516	ENSMUSG00000016128	ENSMUSG00000039546	ENSMUSG00000031760	ENSMUSG00000038453	ENSMUSG00000027692	ENSMUSG00000033149	ENSMUSG00000041607	ENSMUSG00000026837	ENSMUSG00000015222	ENSMUSG00000044674
GO:BP	cell differentiation	GO:0030154	6.80687e-11	10.1671	3841	915	265	20346	ENSMUSG00000052229	ENSMUSG00000033006	ENSMUSG00000031385	ENSMUSG00000024366	ENSMUSG00000047976	ENSMUSG00000030701	ENSMUSG00000040759	ENSMUSG00000019874	ENSMUSG00000020774	ENSMUSG00000022122	ENSMUSG00000026872	ENSMUSG00000027966	ENSMUSG00000044294	ENSMUSG00000059974	ENSMUSG00000047261	ENSMUSG00000037962	ENSMUSG00000020916	ENSMUSG00000026768	ENSMUSG00000064325	ENSMUSG00000045672	ENSMUSG00000021904	ENSMUSG00000031990	ENSMUSG00000020689	ENSMUSG00000090125	ENSMUSG00000042453	ENSMUSG00000063765	ENSMUSG00000031425	ENSMUSG00000027750	ENSMUSG00000000693	ENSMUSG00000009281	ENSMUSG00000019846	ENSMUSG00000018830	ENSMUSG00000042284	ENSMUSG00000036560	ENSMUSG00000026728	ENSMUSG00000059146	ENSMUSG00000019899	ENSMUSG00000028476	ENSMUSG00000035735	ENSMUSG00000024304	ENSMUSG00000042258
GO:BP	cell surface receptor signaling pathway	GO:0007166	1.44511e-10	9.8401	2234	837	164	20346	ENSMUSG00000033006	ENSMUSG00000031385	ENSMUSG00000024366	ENSMUSG00000026872	ENSMUSG00000026768	ENSMUSG00000022103	ENSMUSG00000039385	ENSMUSG00000064325	ENSMUSG00000011256	ENSMUSG00000020689	ENSMUSG00000001985	ENSMUSG00000042453	ENSMUSG00000031425	ENSMUSG00000027750	ENSMUSG00000016024	ENSMUSG00000000693	ENSMUSG00000009281	ENSMUSG00000021567	ENSMUSG00000031613	ENSMUSG00000042284	ENSMUSG00000026728	ENSMUSG00000059146	ENSMUSG00000028476	ENSMUSG00000035735	ENSMUSG00000024304	ENSMUSG00000042258	ENSMUSG00000022419	ENSMUSG00000031486	ENSMUSG00000035451	ENSMUSG00000070867	ENSMUSG00000031626	ENSMUSG00000055254	ENSMUSG00000029468	ENSMUSG00000029661	ENSMUSG00000026043	ENSMUSG00000001506	ENSMUSG00000031503	ENSMUSG00000061353	ENSMUSG00000028780	ENSMUSG00000031502	ENSMUSG00000025089
GO:BP	plasma membrane bounded cell projection organization	GO:0120036	1.98327e-10	9.70262	1359	921	123	20346	ENSMUSG00000031385	ENSMUSG00000024366	ENSMUSG00000026872	ENSMUSG00000059974	ENSMUSG00000047261	ENSMUSG00000021904	ENSMUSG00000031990	ENSMUSG00000042453	ENSMUSG00000031425	ENSMUSG00000027750	ENSMUSG00000030428	ENSMUSG00000042284	ENSMUSG00000026728	ENSMUSG00000059146	ENSMUSG00000019899	ENSMUSG00000024304	ENSMUSG00000042258	ENSMUSG00000002274	ENSMUSG00000038668	ENSMUSG00000055254	ENSMUSG00000029468	ENSMUSG00000015745	ENSMUSG00000061353	ENSMUSG00000028780	ENSMUSG00000039621	ENSMUSG00000025020	ENSMUSG00000018217	ENSMUSG00000025089	ENSMUSG00000017724	ENSMUSG00000026249	ENSMUSG00000029207	ENSMUSG00000056427	ENSMUSG00000040729	ENSMUSG00000055407	ENSMUSG00000045103	ENSMUSG00000027200	ENSMUSG00000052516	ENSMUSG00000026826	ENSMUSG00000031760	ENSMUSG00000032318	ENSMUSG00000038453
GO:BP	cellular component organization or biogenesis	GO:0071840	2.35411e-10	9.62817	5436	967	361	20346	ENSMUSG00000031385	ENSMUSG00000024366	ENSMUSG00000031354	ENSMUSG00000047976	ENSMUSG00000038077	ENSMUSG00000026872	ENSMUSG00000027966	ENSMUSG00000059974	ENSMUSG00000047261	ENSMUSG00000037962	ENSMUSG00000026768	ENSMUSG00000020297	ENSMUSG00000045672	ENSMUSG00000021904	ENSMUSG00000004098	ENSMUSG00000031990	ENSMUSG00000020689	ENSMUSG00000042453	ENSMUSG00000063765	ENSMUSG00000046618	ENSMUSG00000031425	ENSMUSG00000027750	ENSMUSG00000016024	ENSMUSG00000000693	ENSMUSG00000030428	ENSMUSG00000005397	ENSMUSG00000021567	ENSMUSG00000038463	ENSMUSG00000018830	ENSMUSG00000037736	ENSMUSG00000056870	ENSMUSG00000042284	ENSMUSG00000026728	ENSMUSG00000059146	ENSMUSG00000019899	ENSMUSG00000075284	ENSMUSG00000042961	ENSMUSG00000028476	ENSMUSG00000024304	ENSMUSG00000042258	ENSMUSG00000022419
GO:BP	neuron development	GO:0048666	2.72101e-10	9.56527	1071	908	103	20346	ENSMUSG00000031385	ENSMUSG00000024366	ENSMUSG00000022122	ENSMUSG00000026872	ENSMUSG00000059974	ENSMUSG00000047261	ENSMUSG00000021904	ENSMUSG00000031990	ENSMUSG00000042453	ENSMUSG00000031425	ENSMUSG00000027750	ENSMUSG00000042284	ENSMUSG00000036560	ENSMUSG00000026728	ENSMUSG00000059146	ENSMUSG00000019899	ENSMUSG00000024304	ENSMUSG00000042258	ENSMUSG00000002274	ENSMUSG00000038668	ENSMUSG00000055254	ENSMUSG00000061353	ENSMUSG00000028780	ENSMUSG00000039621	ENSMUSG00000025020	ENSMUSG00000018217	ENSMUSG00000005360	ENSMUSG00000025089	ENSMUSG00000017724	ENSMUSG00000026249	ENSMUSG00000029207	ENSMUSG00000056427	ENSMUSG00000055407	ENSMUSG00000045103	ENSMUSG00000027200	ENSMUSG00000052516	ENSMUSG00000026826	ENSMUSG00000031760	ENSMUSG00000032318	ENSMUSG00000026890	ENSMUSG00000038453
GO:BP	neuron projection development	GO:0031175	6.49248e-10	9.18759	949	908	94	20346	ENSMUSG00000031385	ENSMUSG00000024366	ENSMUSG00000026872	ENSMUSG00000059974	ENSMUSG00000047261	ENSMUSG00000021904	ENSMUSG00000031990	ENSMUSG00000042453	ENSMUSG00000031425	ENSMUSG00000027750	ENSMUSG00000042284	ENSMUSG00000026728	ENSMUSG00000059146	ENSMUSG00000019899	ENSMUSG00000024304	ENSMUSG00000042258	ENSMUSG00000002274	ENSMUSG00000038668	ENSMUSG00000055254	ENSMUSG00000061353	ENSMUSG00000028780	ENSMUSG00000039621	ENSMUSG00000025020	ENSMUSG00000018217	ENSMUSG00000025089	ENSMUSG00000017724	ENSMUSG00000026249	ENSMUSG00000029207	ENSMUSG00000056427	ENSMUSG00000055407	ENSMUSG00000045103	ENSMUSG00000027200	ENSMUSG00000052516	ENSMUSG00000026826	ENSMUSG00000031760	ENSMUSG00000032318	ENSMUSG00000038453	ENSMUSG00000002900	ENSMUSG00000032118	ENSMUSG00000022324	ENSMUSG00000068220
GO:BP	cell motility	GO:0048870	8.20311e-10	9.08602	1421	828	116	20346	ENSMUSG00000033006	ENSMUSG00000031385	ENSMUSG00000024366	ENSMUSG00000022122	ENSMUSG00000026872	ENSMUSG00000045930	ENSMUSG00000031990	ENSMUSG00000020689	ENSMUSG00000042453	ENSMUSG00000027750	ENSMUSG00000016024	ENSMUSG00000009281	ENSMUSG00000019846	ENSMUSG00000037736	ENSMUSG00000042284	ENSMUSG00000021256	ENSMUSG00000053475	ENSMUSG00000026728	ENSMUSG00000059146	ENSMUSG00000019899	ENSMUSG00000028476	ENSMUSG00000024304	ENSMUSG00000042258	ENSMUSG00000031486	ENSMUSG00000038668	ENSMUSG00000055254	ENSMUSG00000015745	ENSMUSG00000026043	ENSMUSG00000001506	ENSMUSG00000061353	ENSMUSG00000028780	ENSMUSG00000039621	ENSMUSG00000025020	ENSMUSG00000032035	ENSMUSG00000025089	ENSMUSG00000037605	ENSMUSG00000029207	ENSMUSG00000019929	ENSMUSG00000027200	ENSMUSG00000015533	ENSMUSG00000026826
GO:BP	localization of cell	GO:0051674	8.20311e-10	9.08602	1421	828	116	20346	ENSMUSG00000033006	ENSMUSG00000031385	ENSMUSG00000024366	ENSMUSG00000022122	ENSMUSG00000026872	ENSMUSG00000045930	ENSMUSG00000031990	ENSMUSG00000020689	ENSMUSG00000042453	ENSMUSG00000027750	ENSMUSG00000016024	ENSMUSG00000009281	ENSMUSG00000019846	ENSMUSG00000037736	ENSMUSG00000042284	ENSMUSG00000021256	ENSMUSG00000053475	ENSMUSG00000026728	ENSMUSG00000059146	ENSMUSG00000019899	ENSMUSG00000028476	ENSMUSG00000024304	ENSMUSG00000042258	ENSMUSG00000031486	ENSMUSG00000038668	ENSMUSG00000055254	ENSMUSG00000015745	ENSMUSG00000026043	ENSMUSG00000001506	ENSMUSG00000061353	ENSMUSG00000028780	ENSMUSG00000039621	ENSMUSG00000025020	ENSMUSG00000032035	ENSMUSG00000025089	ENSMUSG00000037605	ENSMUSG00000029207	ENSMUSG00000019929	ENSMUSG00000027200	ENSMUSG00000015533	ENSMUSG00000026826
GO:BP	circulatory system development	GO:0072359	8.24846e-10	9.08363	1095	968	108	20346	ENSMUSG00000027966	ENSMUSG00000045930	ENSMUSG00000064325	ENSMUSG00000011256	ENSMUSG00000031990	ENSMUSG00000020689	ENSMUSG00000019846	ENSMUSG00000018830	ENSMUSG00000031613	ENSMUSG00000021256	ENSMUSG00000059146	ENSMUSG00000028476	ENSMUSG00000024304	ENSMUSG00000042258	ENSMUSG00000031486	ENSMUSG00000031626	ENSMUSG00000055254	ENSMUSG00000029661	ENSMUSG00000026043	ENSMUSG00000001506	ENSMUSG00000031503	ENSMUSG00000061353	ENSMUSG00000028780	ENSMUSG00000031502	ENSMUSG00000032035	ENSMUSG00000038244	ENSMUSG00000023885	ENSMUSG00000056427	ENSMUSG00000000120	ENSMUSG00000019929	ENSMUSG00000029675	ENSMUSG00000016128	ENSMUSG00000035783	ENSMUSG00000037016	ENSMUSG00000067001	ENSMUSG00000021469	ENSMUSG00000026837	ENSMUSG00000068196	ENSMUSG00000044674	ENSMUSG00000002985	ENSMUSG00000030323
GO:BP	regulation of multicellular organismal process	GO:0051239	1.024e-09	8.9897	3028	711	178	20346	ENSMUSG00000033006	ENSMUSG00000031385	ENSMUSG00000047976	ENSMUSG00000015843	ENSMUSG00000027199	ENSMUSG00000020774	ENSMUSG00000022122	ENSMUSG00000026872	ENSMUSG00000044294	ENSMUSG00000059974	ENSMUSG00000047261	ENSMUSG00000037962	ENSMUSG00000020916	ENSMUSG00000064325	ENSMUSG00000021904	ENSMUSG00000020689	ENSMUSG00000042453	ENSMUSG00000063765	ENSMUSG00000027750	ENSMUSG00000036570	ENSMUSG00000016024	ENSMUSG00000000693	ENSMUSG00000019846	ENSMUSG00000021256	ENSMUSG00000036560	ENSMUSG00000026728	ENSMUSG00000059146	ENSMUSG00000019899	ENSMUSG00000028476	ENSMUSG00000024304	ENSMUSG00000042258	ENSMUSG00000002274	ENSMUSG00000031486	ENSMUSG00000035451	ENSMUSG00000038668	ENSMUSG00000055254	ENSMUSG00000029468	ENSMUSG00000026043	ENSMUSG00000001506	ENSMUSG00000031503	ENSMUSG00000061353
GO:BP	anatomical structure formation involved in morphogenesis	GO:0048646	2.07631e-09	8.68271	1087	784	92	20346	ENSMUSG00000031354	ENSMUSG00000026872	ENSMUSG00000027966	ENSMUSG00000045930	ENSMUSG00000026768	ENSMUSG00000064325	ENSMUSG00000031990	ENSMUSG00000020689	ENSMUSG00000042453	ENSMUSG00000021256	ENSMUSG00000028476	ENSMUSG00000042258	ENSMUSG00000031486	ENSMUSG00000035451	ENSMUSG00000015745	ENSMUSG00000001506	ENSMUSG00000031503	ENSMUSG00000061353	ENSMUSG00000028780	ENSMUSG00000031502	ENSMUSG00000032035	ENSMUSG00000023885	ENSMUSG00000020614	ENSMUSG00000000120	ENSMUSG00000019929	ENSMUSG00000015533	ENSMUSG00000026494	ENSMUSG00000016128	ENSMUSG00000027800	ENSMUSG00000030031	ENSMUSG00000002900	ENSMUSG00000033149	ENSMUSG00000021469	ENSMUSG00000026640	ENSMUSG00000026837	ENSMUSG00000068196	ENSMUSG00000044674	ENSMUSG00000024044	ENSMUSG00000030323	ENSMUSG00000028194	ENSMUSG00000026042
GO:BP	regulation of cell migration	GO:0030334	2.35824e-09	8.62741	826	759	75	20346	ENSMUSG00000031385	ENSMUSG00000031990	ENSMUSG00000020689	ENSMUSG00000042453	ENSMUSG00000027750	ENSMUSG00000016024	ENSMUSG00000009281	ENSMUSG00000019846	ENSMUSG00000037736	ENSMUSG00000021256	ENSMUSG00000053475	ENSMUSG00000026728	ENSMUSG00000059146	ENSMUSG00000019899	ENSMUSG00000028476	ENSMUSG00000031486	ENSMUSG00000038668	ENSMUSG00000026043	ENSMUSG00000001506	ENSMUSG00000061353	ENSMUSG00000028780	ENSMUSG00000039621	ENSMUSG00000032035	ENSMUSG00000019929	ENSMUSG00000027200	ENSMUSG00000015533	ENSMUSG00000016128	ENSMUSG00000035783	ENSMUSG00000038453	ENSMUSG00000053141	ENSMUSG00000002900	ENSMUSG00000033149	ENSMUSG00000026640	ENSMUSG00000037685	ENSMUSG00000039985	ENSMUSG00000032714	ENSMUSG00000002985	ENSMUSG00000025314	ENSMUSG00000025810	ENSMUSG00000014158	ENSMUSG00000022548
GO:BP	axon development	GO:0061564	2.67157e-09	8.57323	422	449	37	20346	ENSMUSG00000024366	ENSMUSG00000026872	ENSMUSG00000047261	ENSMUSG00000021904	ENSMUSG00000031990	ENSMUSG00000042453	ENSMUSG00000031425	ENSMUSG00000026728	ENSMUSG00000059146	ENSMUSG00000019899	ENSMUSG00000024304	ENSMUSG00000042258	ENSMUSG00000002274	ENSMUSG00000055254	ENSMUSG00000061353	ENSMUSG00000028780	ENSMUSG00000025020	ENSMUSG00000017724	ENSMUSG00000029207	ENSMUSG00000056427	ENSMUSG00000055407	ENSMUSG00000027200	ENSMUSG00000052516	ENSMUSG00000026826	ENSMUSG00000031760	ENSMUSG00000032318	ENSMUSG00000022324	ENSMUSG00000023915	ENSMUSG00000006782	ENSMUSG00000015222	ENSMUSG00000002985	ENSMUSG00000044667	ENSMUSG00000035513	ENSMUSG00000025810	ENSMUSG00000022548	ENSMUSG00000000305	ENSMUSG00000020099
GO:BP	animal organ morphogenesis	GO:0009887	3.5329e-09	8.45187	955	900	92	20346	ENSMUSG00000031354	ENSMUSG00000027966	ENSMUSG00000037962	ENSMUSG00000026768	ENSMUSG00000064325	ENSMUSG00000045672	ENSMUSG00000001655	ENSMUSG00000024304	ENSMUSG00000042258	ENSMUSG00000035451	ENSMUSG00000055254	ENSMUSG00000029468	ENSMUSG00000029661	ENSMUSG00000026043	ENSMUSG00000001506	ENSMUSG00000028780	ENSMUSG00000038244	ENSMUSG00000017724	ENSMUSG00000040998	ENSMUSG00000029563	ENSMUSG00000020614	ENSMUSG00000056427	ENSMUSG00000015533	ENSMUSG00000029675	ENSMUSG00000026494	ENSMUSG00000039546	ENSMUSG00000035783	ENSMUSG00000023391	ENSMUSG00000002900	ENSMUSG00000039518	ENSMUSG00000021469	ENSMUSG00000026837	ENSMUSG00000059430	ENSMUSG00000068196	ENSMUSG00000044674	ENSMUSG00000031561	ENSMUSG00000000782	ENSMUSG00000028121	ENSMUSG00000030323	ENSMUSG00000026042	ENSMUSG00000025810
GO:BP	epithelium development	GO:0060429	3.97093e-09	8.40111	1081	887	99	20346	ENSMUSG00000033006	ENSMUSG00000026872	ENSMUSG00000044294	ENSMUSG00000020916	ENSMUSG00000064325	ENSMUSG00000090125	ENSMUSG00000000693	ENSMUSG00000001655	ENSMUSG00000026728	ENSMUSG00000059146	ENSMUSG00000024304	ENSMUSG00000019539	ENSMUSG00000035451	ENSMUSG00000061353	ENSMUSG00000024063	ENSMUSG00000028780	ENSMUSG00000060548	ENSMUSG00000031502	ENSMUSG00000038244	ENSMUSG00000017724	ENSMUSG00000026249	ENSMUSG00000040998	ENSMUSG00000029563	ENSMUSG00000032085	ENSMUSG00000045103	ENSMUSG00000015533	ENSMUSG00000052516	ENSMUSG00000026494	ENSMUSG00000016128	ENSMUSG00000044737	ENSMUSG00000070348	ENSMUSG00000039546	ENSMUSG00000025934	ENSMUSG00000035783	ENSMUSG00000037016	ENSMUSG00000067586	ENSMUSG00000024136	ENSMUSG00000033149	ENSMUSG00000021469	ENSMUSG00000055435	ENSMUSG00000071847
GO:BP	regulation of cellular component movement	GO:0051270	5.30511e-09	8.27531	962	745	81	20346	ENSMUSG00000031385	ENSMUSG00000031990	ENSMUSG00000020689	ENSMUSG00000042453	ENSMUSG00000027750	ENSMUSG00000036570	ENSMUSG00000016024	ENSMUSG00000009281	ENSMUSG00000019846	ENSMUSG00000037736	ENSMUSG00000021256	ENSMUSG00000053475	ENSMUSG00000026728	ENSMUSG00000059146	ENSMUSG00000019899	ENSMUSG00000028476	ENSMUSG00000031486	ENSMUSG00000038668	ENSMUSG00000026043	ENSMUSG00000001506	ENSMUSG00000061353	ENSMUSG00000028780	ENSMUSG00000039621	ENSMUSG00000025020	ENSMUSG00000032035	ENSMUSG00000019929	ENSMUSG00000027200	ENSMUSG00000015533	ENSMUSG00000016128	ENSMUSG00000035783	ENSMUSG00000038453	ENSMUSG00000053141	ENSMUSG00000002900	ENSMUSG00000032118	ENSMUSG00000033149	ENSMUSG00000026640	ENSMUSG00000015222	ENSMUSG00000037685	ENSMUSG00000039985	ENSMUSG00000032714	ENSMUSG00000002985
GO:BP	tube morphogenesis	GO:0035239	5.4832e-09	8.26097	859	850	82	20346	ENSMUSG00000033006	ENSMUSG00000026872	ENSMUSG00000045930	ENSMUSG00000064325	ENSMUSG00000031990	ENSMUSG00000020689	ENSMUSG00000031613	ENSMUSG00000021256	ENSMUSG00000028476	ENSMUSG00000024304	ENSMUSG00000042258	ENSMUSG00000031486	ENSMUSG00000035451	ENSMUSG00000055254	ENSMUSG00000026043	ENSMUSG00000031503	ENSMUSG00000061353	ENSMUSG00000031502	ENSMUSG00000032035	ENSMUSG00000038244	ENSMUSG00000023885	ENSMUSG00000017724	ENSMUSG00000040998	ENSMUSG00000000120	ENSMUSG00000019929	ENSMUSG00000026494	ENSMUSG00000016128	ENSMUSG00000021469	ENSMUSG00000068196	ENSMUSG00000044674	ENSMUSG00000000782	ENSMUSG00000002985	ENSMUSG00000030323	ENSMUSG00000028194	ENSMUSG00000025810	ENSMUSG00000015305	ENSMUSG00000022479	ENSMUSG00000033721	ENSMUSG00000020099	ENSMUSG00000018593	ENSMUSG00000071226
GO:BP	taxis	GO:0042330	6.05997e-09	8.21753	522	887	61	20346	ENSMUSG00000031385	ENSMUSG00000024366	ENSMUSG00000040759	ENSMUSG00000022122	ENSMUSG00000047261	ENSMUSG00000031990	ENSMUSG00000020689	ENSMUSG00000042453	ENSMUSG00000016024	ENSMUSG00000009281	ENSMUSG00000042284	ENSMUSG00000059146	ENSMUSG00000019899	ENSMUSG00000042258	ENSMUSG00000031486	ENSMUSG00000038668	ENSMUSG00000061353	ENSMUSG00000028780	ENSMUSG00000039621	ENSMUSG00000025020	ENSMUSG00000017724	ENSMUSG00000029207	ENSMUSG00000056427	ENSMUSG00000015533	ENSMUSG00000052516	ENSMUSG00000039775	ENSMUSG00000032318	ENSMUSG00000022324	ENSMUSG00000022885	ENSMUSG00000025314	ENSMUSG00000025810	ENSMUSG00000014158	ENSMUSG00000033721	ENSMUSG00000000305	ENSMUSG00000020099	ENSMUSG00000026814	ENSMUSG00000041688	ENSMUSG00000029755	ENSMUSG00000000125	ENSMUSG00000059230	ENSMUSG00000003518
GO:BP	myelination	GO:0042552	6.07879e-09	8.21618	124	170	14	20346	ENSMUSG00000033006	ENSMUSG00000015843	ENSMUSG00000056966	ENSMUSG00000020774	ENSMUSG00000056569	ENSMUSG00000031990	ENSMUSG00000090125	ENSMUSG00000031425	ENSMUSG00000036560	ENSMUSG00000059146	ENSMUSG00000024304	ENSMUSG00000038668	ENSMUSG00000055254	ENSMUSG00000018217
GO:BP	neuron differentiation	GO:0030182	6.51197e-09	8.18629	1317	470	73	20346	ENSMUSG00000031385	ENSMUSG00000024366	ENSMUSG00000022122	ENSMUSG00000026872	ENSMUSG00000059974	ENSMUSG00000047261	ENSMUSG00000021904	ENSMUSG00000031990	ENSMUSG00000042453	ENSMUSG00000031425	ENSMUSG00000027750	ENSMUSG00000042284	ENSMUSG00000036560	ENSMUSG00000026728	ENSMUSG00000059146	ENSMUSG00000019899	ENSMUSG00000024304	ENSMUSG00000042258	ENSMUSG00000002274	ENSMUSG00000035451	ENSMUSG00000038668	ENSMUSG00000055254	ENSMUSG00000061353	ENSMUSG00000028780	ENSMUSG00000039621	ENSMUSG00000025020	ENSMUSG00000018217	ENSMUSG00000005360	ENSMUSG00000025089	ENSMUSG00000017724	ENSMUSG00000026249	ENSMUSG00000029207	ENSMUSG00000056427	ENSMUSG00000031283	ENSMUSG00000055407	ENSMUSG00000045103	ENSMUSG00000027200	ENSMUSG00000052516	ENSMUSG00000026826	ENSMUSG00000023391	ENSMUSG00000031760
GO:BP	ensheathment of neurons	GO:0007272	8.47043e-09	8.07209	127	170	14	20346	ENSMUSG00000033006	ENSMUSG00000015843	ENSMUSG00000056966	ENSMUSG00000020774	ENSMUSG00000056569	ENSMUSG00000031990	ENSMUSG00000090125	ENSMUSG00000031425	ENSMUSG00000036560	ENSMUSG00000059146	ENSMUSG00000024304	ENSMUSG00000038668	ENSMUSG00000055254	ENSMUSG00000018217
GO:BP	axon ensheathment	GO:0008366	8.47043e-09	8.07209	127	170	14	20346	ENSMUSG00000033006	ENSMUSG00000015843	ENSMUSG00000056966	ENSMUSG00000020774	ENSMUSG00000056569	ENSMUSG00000031990	ENSMUSG00000090125	ENSMUSG00000031425	ENSMUSG00000036560	ENSMUSG00000059146	ENSMUSG00000024304	ENSMUSG00000038668	ENSMUSG00000055254	ENSMUSG00000018217
GO:BP	gliogenesis	GO:0042063	9.10804e-09	8.04058	307	887	44	20346	ENSMUSG00000052229	ENSMUSG00000033006	ENSMUSG00000020774	ENSMUSG00000047261	ENSMUSG00000090125	ENSMUSG00000042453	ENSMUSG00000031425	ENSMUSG00000036560	ENSMUSG00000026728	ENSMUSG00000059146	ENSMUSG00000019899	ENSMUSG00000024304	ENSMUSG00000002274	ENSMUSG00000038668	ENSMUSG00000055254	ENSMUSG00000026249	ENSMUSG00000040260	ENSMUSG00000045103	ENSMUSG00000023391	ENSMUSG00000031760	ENSMUSG00000002900	ENSMUSG00000022324	ENSMUSG00000071847	ENSMUSG00000023915	ENSMUSG00000006782	ENSMUSG00000009248	ENSMUSG00000046876	ENSMUSG00000029070	ENSMUSG00000001911	ENSMUSG00000027985	ENSMUSG00000048616	ENSMUSG00000021756	ENSMUSG00000053198	ENSMUSG00000037643	ENSMUSG00000026883	ENSMUSG00000062078	ENSMUSG00000026435	ENSMUSG00000013089	ENSMUSG00000020644	ENSMUSG00000020758	ENSMUSG00000015452
GO:BP	cardiovascular system development	GO:0072358	1.25496e-08	7.90137	739	968	80	20346	ENSMUSG00000045930	ENSMUSG00000064325	ENSMUSG00000031990	ENSMUSG00000020689	ENSMUSG00000019846	ENSMUSG00000031613	ENSMUSG00000021256	ENSMUSG00000028476	ENSMUSG00000024304	ENSMUSG00000042258	ENSMUSG00000031486	ENSMUSG00000055254	ENSMUSG00000029661	ENSMUSG00000026043	ENSMUSG00000001506	ENSMUSG00000031503	ENSMUSG00000061353	ENSMUSG00000028780	ENSMUSG00000031502	ENSMUSG00000032035	ENSMUSG00000023885	ENSMUSG00000000120	ENSMUSG00000019929	ENSMUSG00000016128	ENSMUSG00000035783	ENSMUSG00000067001	ENSMUSG00000026837	ENSMUSG00000068196	ENSMUSG00000002985	ENSMUSG00000028194	ENSMUSG00000025810	ENSMUSG00000015305	ENSMUSG00000033721	ENSMUSG00000032334	ENSMUSG00000020099	ENSMUSG00000018593	ENSMUSG00000063506	ENSMUSG00000000753	ENSMUSG00000027351	ENSMUSG00000026814	ENSMUSG00000041688
GO:BP	chemotaxis	GO:0006935	1.57869e-08	7.8017	520	887	60	20346	ENSMUSG00000031385	ENSMUSG00000024366	ENSMUSG00000040759	ENSMUSG00000022122	ENSMUSG00000047261	ENSMUSG00000031990	ENSMUSG00000020689	ENSMUSG00000042453	ENSMUSG00000016024	ENSMUSG00000009281	ENSMUSG00000042284	ENSMUSG00000059146	ENSMUSG00000019899	ENSMUSG00000042258	ENSMUSG00000031486	ENSMUSG00000038668	ENSMUSG00000061353	ENSMUSG00000028780	ENSMUSG00000039621	ENSMUSG00000025020	ENSMUSG00000017724	ENSMUSG00000029207	ENSMUSG00000056427	ENSMUSG00000015533	ENSMUSG00000052516	ENSMUSG00000039775	ENSMUSG00000032318	ENSMUSG00000022324	ENSMUSG00000022885	ENSMUSG00000025314	ENSMUSG00000025810	ENSMUSG00000014158	ENSMUSG00000033721	ENSMUSG00000000305	ENSMUSG00000020099	ENSMUSG00000026814	ENSMUSG00000041688	ENSMUSG00000029755	ENSMUSG00000000125	ENSMUSG00000059230	ENSMUSG00000003518
GO:BP	glial cell differentiation	GO:0010001	1.63111e-08	7.78752	219	321	22	20346	ENSMUSG00000052229	ENSMUSG00000033006	ENSMUSG00000020774	ENSMUSG00000047261	ENSMUSG00000090125	ENSMUSG00000042453	ENSMUSG00000031425	ENSMUSG00000036560	ENSMUSG00000026728	ENSMUSG00000059146	ENSMUSG00000019899	ENSMUSG00000024304	ENSMUSG00000002274	ENSMUSG00000038668	ENSMUSG00000055254	ENSMUSG00000026249	ENSMUSG00000040260	ENSMUSG00000045103	ENSMUSG00000023391	ENSMUSG00000031760	ENSMUSG00000023915	ENSMUSG00000006782
GO:BP	supramolecular fiber organization	GO:0097435	3.49729e-08	7.45627	582	960	67	20346	ENSMUSG00000027966	ENSMUSG00000037962	ENSMUSG00000063765	ENSMUSG00000000693	ENSMUSG00000018830	ENSMUSG00000037736	ENSMUSG00000026728	ENSMUSG00000075284	ENSMUSG00000025006	ENSMUSG00000038668	ENSMUSG00000031626	ENSMUSG00000029661	ENSMUSG00000026043	ENSMUSG00000001506	ENSMUSG00000021676	ENSMUSG00000039621	ENSMUSG00000038244	ENSMUSG00000032060	ENSMUSG00000052415	ENSMUSG00000032289	ENSMUSG00000040729	ENSMUSG00000029675	ENSMUSG00000013921	ENSMUSG00000038729	ENSMUSG00000058624	ENSMUSG00000033149	ENSMUSG00000041734	ENSMUSG00000026837	ENSMUSG00000015222	ENSMUSG00000033327	ENSMUSG00000020473	ENSMUSG00000035407	ENSMUSG00000024533	ENSMUSG00000002985	ENSMUSG00000025104	ENSMUSG00000026042	ENSMUSG00000025810	ENSMUSG00000014158	ENSMUSG00000030116	ENSMUSG00000026574	ENSMUSG00000029528
GO:BP	regulation of cell motility	GO:2000145	3.51065e-08	7.45461	873	759	75	20346	ENSMUSG00000031385	ENSMUSG00000031990	ENSMUSG00000020689	ENSMUSG00000042453	ENSMUSG00000027750	ENSMUSG00000016024	ENSMUSG00000009281	ENSMUSG00000019846	ENSMUSG00000037736	ENSMUSG00000021256	ENSMUSG00000053475	ENSMUSG00000026728	ENSMUSG00000059146	ENSMUSG00000019899	ENSMUSG00000028476	ENSMUSG00000031486	ENSMUSG00000038668	ENSMUSG00000026043	ENSMUSG00000001506	ENSMUSG00000061353	ENSMUSG00000028780	ENSMUSG00000039621	ENSMUSG00000032035	ENSMUSG00000019929	ENSMUSG00000027200	ENSMUSG00000015533	ENSMUSG00000016128	ENSMUSG00000035783	ENSMUSG00000038453	ENSMUSG00000053141	ENSMUSG00000002900	ENSMUSG00000033149	ENSMUSG00000026640	ENSMUSG00000037685	ENSMUSG00000039985	ENSMUSG00000032714	ENSMUSG00000002985	ENSMUSG00000025314	ENSMUSG00000025810	ENSMUSG00000014158	ENSMUSG00000022548
GO:BP	blood vessel development	GO:0001568	3.577e-08	7.44648	699	968	76	20346	ENSMUSG00000045930	ENSMUSG00000064325	ENSMUSG00000031990	ENSMUSG00000020689	ENSMUSG00000019846	ENSMUSG00000031613	ENSMUSG00000021256	ENSMUSG00000028476	ENSMUSG00000024304	ENSMUSG00000042258	ENSMUSG00000031486	ENSMUSG00000055254	ENSMUSG00000029661	ENSMUSG00000026043	ENSMUSG00000001506	ENSMUSG00000031503	ENSMUSG00000061353	ENSMUSG00000028780	ENSMUSG00000031502	ENSMUSG00000032035	ENSMUSG00000023885	ENSMUSG00000000120	ENSMUSG00000019929	ENSMUSG00000016128	ENSMUSG00000035783	ENSMUSG00000067001	ENSMUSG00000026837	ENSMUSG00000068196	ENSMUSG00000002985	ENSMUSG00000028194	ENSMUSG00000025810	ENSMUSG00000015305	ENSMUSG00000033721	ENSMUSG00000032334	ENSMUSG00000020099	ENSMUSG00000018593	ENSMUSG00000063506	ENSMUSG00000000753	ENSMUSG00000027351	ENSMUSG00000026814	ENSMUSG00000041688
GO:BP	vasculature development	GO:0001944	3.67224e-08	7.43507	727	968	78	20346	ENSMUSG00000045930	ENSMUSG00000064325	ENSMUSG00000031990	ENSMUSG00000020689	ENSMUSG00000019846	ENSMUSG00000031613	ENSMUSG00000021256	ENSMUSG00000028476	ENSMUSG00000024304	ENSMUSG00000042258	ENSMUSG00000031486	ENSMUSG00000055254	ENSMUSG00000029661	ENSMUSG00000026043	ENSMUSG00000001506	ENSMUSG00000031503	ENSMUSG00000061353	ENSMUSG00000028780	ENSMUSG00000031502	ENSMUSG00000032035	ENSMUSG00000023885	ENSMUSG00000000120	ENSMUSG00000019929	ENSMUSG00000016128	ENSMUSG00000035783	ENSMUSG00000067001	ENSMUSG00000026837	ENSMUSG00000068196	ENSMUSG00000002985	ENSMUSG00000028194	ENSMUSG00000025810	ENSMUSG00000015305	ENSMUSG00000033721	ENSMUSG00000032334	ENSMUSG00000020099	ENSMUSG00000018593	ENSMUSG00000063506	ENSMUSG00000000753	ENSMUSG00000027351	ENSMUSG00000026814	ENSMUSG00000041688
GO:BP	regulation of locomotion	GO:0040012	4.58512e-08	7.33865	949	759	79	20346	ENSMUSG00000031385	ENSMUSG00000031990	ENSMUSG00000020689	ENSMUSG00000042453	ENSMUSG00000027750	ENSMUSG00000016024	ENSMUSG00000009281	ENSMUSG00000019846	ENSMUSG00000037736	ENSMUSG00000021256	ENSMUSG00000053475	ENSMUSG00000026728	ENSMUSG00000059146	ENSMUSG00000019899	ENSMUSG00000028476	ENSMUSG00000031486	ENSMUSG00000038668	ENSMUSG00000026043	ENSMUSG00000001506	ENSMUSG00000061353	ENSMUSG00000028780	ENSMUSG00000039621	ENSMUSG00000025020	ENSMUSG00000032035	ENSMUSG00000019929	ENSMUSG00000027200	ENSMUSG00000015533	ENSMUSG00000052516	ENSMUSG00000016128	ENSMUSG00000035783	ENSMUSG00000038453	ENSMUSG00000053141	ENSMUSG00000002900	ENSMUSG00000033149	ENSMUSG00000026640	ENSMUSG00000037685	ENSMUSG00000022885	ENSMUSG00000039985	ENSMUSG00000032714	ENSMUSG00000002985	ENSMUSG00000025314
GO:BP	axonogenesis	GO:0007409	7.01208e-08	7.15415	382	449	33	20346	ENSMUSG00000024366	ENSMUSG00000026872	ENSMUSG00000047261	ENSMUSG00000021904	ENSMUSG00000042453	ENSMUSG00000026728	ENSMUSG00000059146	ENSMUSG00000019899	ENSMUSG00000024304	ENSMUSG00000042258	ENSMUSG00000002274	ENSMUSG00000055254	ENSMUSG00000061353	ENSMUSG00000028780	ENSMUSG00000025020	ENSMUSG00000017724	ENSMUSG00000029207	ENSMUSG00000056427	ENSMUSG00000055407	ENSMUSG00000027200	ENSMUSG00000052516	ENSMUSG00000026826	ENSMUSG00000031760	ENSMUSG00000032318	ENSMUSG00000022324	ENSMUSG00000006782	ENSMUSG00000015222	ENSMUSG00000002985	ENSMUSG00000044667	ENSMUSG00000035513	ENSMUSG00000025810	ENSMUSG00000000305	ENSMUSG00000020099
GO:BP	cell projection morphogenesis	GO:0048858	1.05476e-07	6.97685	584	404	39	20346	ENSMUSG00000024366	ENSMUSG00000026872	ENSMUSG00000047261	ENSMUSG00000021904	ENSMUSG00000020689	ENSMUSG00000042453	ENSMUSG00000027750	ENSMUSG00000042284	ENSMUSG00000026728	ENSMUSG00000059146	ENSMUSG00000019899	ENSMUSG00000024304	ENSMUSG00000042258	ENSMUSG00000002274	ENSMUSG00000055254	ENSMUSG00000015745	ENSMUSG00000061353	ENSMUSG00000028780	ENSMUSG00000025020	ENSMUSG00000017724	ENSMUSG00000029207	ENSMUSG00000056427	ENSMUSG00000055407	ENSMUSG00000045103	ENSMUSG00000027200	ENSMUSG00000052516	ENSMUSG00000026826	ENSMUSG00000031760	ENSMUSG00000032318	ENSMUSG00000038453	ENSMUSG00000022324	ENSMUSG00000027692	ENSMUSG00000006782	ENSMUSG00000015222	ENSMUSG00000024044	ENSMUSG00000002985	ENSMUSG00000044667	ENSMUSG00000035513	ENSMUSG00000025810
GO:BP	cell part morphogenesis	GO:0032990	1.3681e-07	6.86388	616	404	40	20346	ENSMUSG00000024366	ENSMUSG00000026872	ENSMUSG00000047261	ENSMUSG00000021904	ENSMUSG00000020689	ENSMUSG00000042453	ENSMUSG00000027750	ENSMUSG00000042284	ENSMUSG00000026728	ENSMUSG00000059146	ENSMUSG00000019899	ENSMUSG00000024304	ENSMUSG00000042258	ENSMUSG00000002274	ENSMUSG00000055254	ENSMUSG00000015745	ENSMUSG00000061353	ENSMUSG00000028780	ENSMUSG00000025020	ENSMUSG00000017724	ENSMUSG00000029207	ENSMUSG00000056427	ENSMUSG00000055407	ENSMUSG00000045103	ENSMUSG00000027200	ENSMUSG00000052516	ENSMUSG00000026826	ENSMUSG00000031760	ENSMUSG00000032318	ENSMUSG00000038453	ENSMUSG00000032118	ENSMUSG00000022324	ENSMUSG00000027692	ENSMUSG00000006782	ENSMUSG00000015222	ENSMUSG00000024044	ENSMUSG00000002985	ENSMUSG00000044667	ENSMUSG00000035513	ENSMUSG00000025810
GO:BP	regulation of cell-substrate adhesion	GO:0010810	2.14901e-07	6.66776	200	759	30	20346	ENSMUSG00000020689	ENSMUSG00000027750	ENSMUSG00000005397	ENSMUSG00000037736	ENSMUSG00000042961	ENSMUSG00000001506	ENSMUSG00000039621	ENSMUSG00000040998	ENSMUSG00000045103	ENSMUSG00000039546	ENSMUSG00000068220	ENSMUSG00000033149	ENSMUSG00000035258	ENSMUSG00000068196	ENSMUSG00000022885	ENSMUSG00000031342	ENSMUSG00000025314	ENSMUSG00000025810	ENSMUSG00000022548	ENSMUSG00000029053	ENSMUSG00000044447	ENSMUSG00000040690	ENSMUSG00000003518	ENSMUSG00000029163	ENSMUSG00000048915	ENSMUSG00000045038	ENSMUSG00000020319	ENSMUSG00000041075	ENSMUSG00000031841	ENSMUSG00000021365
GO:BP	neuron projection morphogenesis	GO:0048812	2.66285e-07	6.57465	565	897	61	20346	ENSMUSG00000024366	ENSMUSG00000026872	ENSMUSG00000047261	ENSMUSG00000021904	ENSMUSG00000042453	ENSMUSG00000027750	ENSMUSG00000042284	ENSMUSG00000026728	ENSMUSG00000059146	ENSMUSG00000019899	ENSMUSG00000024304	ENSMUSG00000042258	ENSMUSG00000002274	ENSMUSG00000055254	ENSMUSG00000061353	ENSMUSG00000028780	ENSMUSG00000025020	ENSMUSG00000017724	ENSMUSG00000029207	ENSMUSG00000056427	ENSMUSG00000055407	ENSMUSG00000045103	ENSMUSG00000027200	ENSMUSG00000052516	ENSMUSG00000026826	ENSMUSG00000031760	ENSMUSG00000032318	ENSMUSG00000038453	ENSMUSG00000022324	ENSMUSG00000027692	ENSMUSG00000006782	ENSMUSG00000015222	ENSMUSG00000024044	ENSMUSG00000002985	ENSMUSG00000044667	ENSMUSG00000035513	ENSMUSG00000025810	ENSMUSG00000000305	ENSMUSG00000020099	ENSMUSG00000029053	ENSMUSG00000029755
GO:BP	plasma membrane bounded cell projection morphogenesis	GO:0120039	3.00913e-07	6.52156	581	897	62	20346	ENSMUSG00000024366	ENSMUSG00000026872	ENSMUSG00000047261	ENSMUSG00000021904	ENSMUSG00000042453	ENSMUSG00000027750	ENSMUSG00000042284	ENSMUSG00000026728	ENSMUSG00000059146	ENSMUSG00000019899	ENSMUSG00000024304	ENSMUSG00000042258	ENSMUSG00000002274	ENSMUSG00000055254	ENSMUSG00000015745	ENSMUSG00000061353	ENSMUSG00000028780	ENSMUSG00000025020	ENSMUSG00000017724	ENSMUSG00000029207	ENSMUSG00000056427	ENSMUSG00000055407	ENSMUSG00000045103	ENSMUSG00000027200	ENSMUSG00000052516	ENSMUSG00000026826	ENSMUSG00000031760	ENSMUSG00000032318	ENSMUSG00000038453	ENSMUSG00000022324	ENSMUSG00000027692	ENSMUSG00000006782	ENSMUSG00000015222	ENSMUSG00000024044	ENSMUSG00000002985	ENSMUSG00000044667	ENSMUSG00000035513	ENSMUSG00000025810	ENSMUSG00000000305	ENSMUSG00000020099	ENSMUSG00000029053
GO:BP	central nervous system development	GO:0007417	3.04636e-07	6.51622	900	637	66	20346	ENSMUSG00000052229	ENSMUSG00000033006	ENSMUSG00000047976	ENSMUSG00000019874	ENSMUSG00000020774	ENSMUSG00000026872	ENSMUSG00000026768	ENSMUSG00000090125	ENSMUSG00000042453	ENSMUSG00000031425	ENSMUSG00000000693	ENSMUSG00000026728	ENSMUSG00000059146	ENSMUSG00000024304	ENSMUSG00000042258	ENSMUSG00000031486	ENSMUSG00000038668	ENSMUSG00000055254	ENSMUSG00000026043	ENSMUSG00000061353	ENSMUSG00000056596	ENSMUSG00000031502	ENSMUSG00000025020	ENSMUSG00000032035	ENSMUSG00000026249	ENSMUSG00000029563	ENSMUSG00000040260	ENSMUSG00000045103	ENSMUSG00000027200	ENSMUSG00000052516	ENSMUSG00000026826	ENSMUSG00000023391	ENSMUSG00000031760	ENSMUSG00000032318	ENSMUSG00000026890	ENSMUSG00000002900	ENSMUSG00000032118	ENSMUSG00000051323	ENSMUSG00000028655	ENSMUSG00000023915	ENSMUSG00000006782
GO:BP	cell-substrate junction assembly	GO:0007044	3.37737e-07	6.47142	81	868	20	20346	ENSMUSG00000020689	ENSMUSG00000037736	ENSMUSG00000015533	ENSMUSG00000033149	ENSMUSG00000033985	ENSMUSG00000031342	ENSMUSG00000025314	ENSMUSG00000025810	ENSMUSG00000022548	ENSMUSG00000037712	ENSMUSG00000040690	ENSMUSG00000003518	ENSMUSG00000029528	ENSMUSG00000028465	ENSMUSG00000026478	ENSMUSG00000048915	ENSMUSG00000020319	ENSMUSG00000020758	ENSMUSG00000031523	ENSMUSG00000026193
GO:BP	localization	GO:0051179	5.08049e-07	6.29409	5456	780	288	20346	ENSMUSG00000033006	ENSMUSG00000031385	ENSMUSG00000024366	ENSMUSG00000047976	ENSMUSG00000031028	ENSMUSG00000056966	ENSMUSG00000038077	ENSMUSG00000032268	ENSMUSG00000022122	ENSMUSG00000026872	ENSMUSG00000000359	ENSMUSG00000045930	ENSMUSG00000026768	ENSMUSG00000031990	ENSMUSG00000020689	ENSMUSG00000001985	ENSMUSG00000042453	ENSMUSG00000027750	ENSMUSG00000036570	ENSMUSG00000016024	ENSMUSG00000000693	ENSMUSG00000009281	ENSMUSG00000005338	ENSMUSG00000030428	ENSMUSG00000019846	ENSMUSG00000021567	ENSMUSG00000037736	ENSMUSG00000056870	ENSMUSG00000042284	ENSMUSG00000021256	ENSMUSG00000053475	ENSMUSG00000026728	ENSMUSG00000059146	ENSMUSG00000019899	ENSMUSG00000075284	ENSMUSG00000028476	ENSMUSG00000024304	ENSMUSG00000042258	ENSMUSG00000019539	ENSMUSG00000038602	ENSMUSG00000041828
GO:BP	cellular response to growth factor stimulus	GO:0071363	5.93707e-07	6.22643	621	708	55	20346	ENSMUSG00000026768	ENSMUSG00000064325	ENSMUSG00000020689	ENSMUSG00000027750	ENSMUSG00000031613	ENSMUSG00000025584	ENSMUSG00000059146	ENSMUSG00000031486	ENSMUSG00000055254	ENSMUSG00000029661	ENSMUSG00000026043	ENSMUSG00000001506	ENSMUSG00000031503	ENSMUSG00000025089	ENSMUSG00000040998	ENSMUSG00000031283	ENSMUSG00000019929	ENSMUSG00000045103	ENSMUSG00000031760	ENSMUSG00000032118	ENSMUSG00000032363	ENSMUSG00000021469	ENSMUSG00000044674	ENSMUSG00000033763	ENSMUSG00000025810	ENSMUSG00000001497	ENSMUSG00000021388	ENSMUSG00000041351	ENSMUSG00000037712	ENSMUSG00000018593	ENSMUSG00000026814	ENSMUSG00000029755	ENSMUSG00000032744	ENSMUSG00000039153	ENSMUSG00000003518	ENSMUSG00000020176	ENSMUSG00000027985	ENSMUSG00000029528	ENSMUSG00000048616	ENSMUSG00000006800	ENSMUSG00000060216
GO:BP	appendage development	GO:0048736	7.49976e-07	6.12495	183	934	31	20346	ENSMUSG00000001655	ENSMUSG00000028476	ENSMUSG00000028780	ENSMUSG00000037138	ENSMUSG00000037016	ENSMUSG00000021469	ENSMUSG00000026640	ENSMUSG00000030323	ENSMUSG00000029755	ENSMUSG00000018604	ENSMUSG00000000125	ENSMUSG00000039153	ENSMUSG00000027985	ENSMUSG00000048616	ENSMUSG00000026335	ENSMUSG00000000093	ENSMUSG00000031565	ENSMUSG00000024598	ENSMUSG00000037325	ENSMUSG00000027253	ENSMUSG00000052534	ENSMUSG00000031951	ENSMUSG00000020319	ENSMUSG00000004085	ENSMUSG00000036555	ENSMUSG00000020758	ENSMUSG00000031229	ENSMUSG00000027763	ENSMUSG00000047193	ENSMUSG00000034687	ENSMUSG00000057530
GO:BP	limb development	GO:0060173	7.49976e-07	6.12495	183	934	31	20346	ENSMUSG00000001655	ENSMUSG00000028476	ENSMUSG00000028780	ENSMUSG00000037138	ENSMUSG00000037016	ENSMUSG00000021469	ENSMUSG00000026640	ENSMUSG00000030323	ENSMUSG00000029755	ENSMUSG00000018604	ENSMUSG00000000125	ENSMUSG00000039153	ENSMUSG00000027985	ENSMUSG00000048616	ENSMUSG00000026335	ENSMUSG00000000093	ENSMUSG00000031565	ENSMUSG00000024598	ENSMUSG00000037325	ENSMUSG00000027253	ENSMUSG00000052534	ENSMUSG00000031951	ENSMUSG00000020319	ENSMUSG00000004085	ENSMUSG00000036555	ENSMUSG00000020758	ENSMUSG00000031229	ENSMUSG00000027763	ENSMUSG00000047193	ENSMUSG00000034687	ENSMUSG00000057530
GO:BP	regulation of cell development	GO:0060284	1.62317e-06	5.78964	989	408	51	20346	ENSMUSG00000033006	ENSMUSG00000031385	ENSMUSG00000020774	ENSMUSG00000022122	ENSMUSG00000026872	ENSMUSG00000059974	ENSMUSG00000037962	ENSMUSG00000021904	ENSMUSG00000020689	ENSMUSG00000042453	ENSMUSG00000027750	ENSMUSG00000026728	ENSMUSG00000059146	ENSMUSG00000028476	ENSMUSG00000024304	ENSMUSG00000042258	ENSMUSG00000002274	ENSMUSG00000031486	ENSMUSG00000035451	ENSMUSG00000038668	ENSMUSG00000055254	ENSMUSG00000026043	ENSMUSG00000061353	ENSMUSG00000028780	ENSMUSG00000039621	ENSMUSG00000025020	ENSMUSG00000018217	ENSMUSG00000026249	ENSMUSG00000040260	ENSMUSG00000055407	ENSMUSG00000045103	ENSMUSG00000027200	ENSMUSG00000052516	ENSMUSG00000023391	ENSMUSG00000031760	ENSMUSG00000032318	ENSMUSG00000067586	ENSMUSG00000038453	ENSMUSG00000032118	ENSMUSG00000068220	ENSMUSG00000027692
GO:BP	response to growth factor	GO:0070848	1.63375e-06	5.78682	648	737	57	20346	ENSMUSG00000026768	ENSMUSG00000064325	ENSMUSG00000020689	ENSMUSG00000027750	ENSMUSG00000031613	ENSMUSG00000025584	ENSMUSG00000059146	ENSMUSG00000031486	ENSMUSG00000055254	ENSMUSG00000029661	ENSMUSG00000026043	ENSMUSG00000001506	ENSMUSG00000031503	ENSMUSG00000025089	ENSMUSG00000040998	ENSMUSG00000031283	ENSMUSG00000019929	ENSMUSG00000045103	ENSMUSG00000031760	ENSMUSG00000032118	ENSMUSG00000032363	ENSMUSG00000021469	ENSMUSG00000044674	ENSMUSG00000033763	ENSMUSG00000025810	ENSMUSG00000001497	ENSMUSG00000021388	ENSMUSG00000041351	ENSMUSG00000037712	ENSMUSG00000018593	ENSMUSG00000026814	ENSMUSG00000029755	ENSMUSG00000032744	ENSMUSG00000039153	ENSMUSG00000003518	ENSMUSG00000020176	ENSMUSG00000027985	ENSMUSG00000029528	ENSMUSG00000048616	ENSMUSG00000006800	ENSMUSG00000060216
GO:BP	enzyme linked receptor protein signaling pathway	GO:0007167	1.85027e-06	5.73276	804	950	78	20346	ENSMUSG00000024366	ENSMUSG00000026768	ENSMUSG00000022103	ENSMUSG00000064325	ENSMUSG00000020689	ENSMUSG00000009281	ENSMUSG00000031613	ENSMUSG00000042284	ENSMUSG00000026728	ENSMUSG00000059146	ENSMUSG00000031486	ENSMUSG00000055254	ENSMUSG00000029661	ENSMUSG00000026043	ENSMUSG00000001506	ENSMUSG00000031503	ENSMUSG00000031502	ENSMUSG00000025089	ENSMUSG00000040998	ENSMUSG00000031283	ENSMUSG00000019929	ENSMUSG00000038729	ENSMUSG00000031760	ENSMUSG00000053141	ENSMUSG00000025083	ENSMUSG00000021469	ENSMUSG00000044674	ENSMUSG00000046876	ENSMUSG00000025082	ENSMUSG00000025314	ENSMUSG00000025810	ENSMUSG00000022548	ENSMUSG00000039959	ENSMUSG00000021388	ENSMUSG00000037712	ENSMUSG00000029053	ENSMUSG00000026814	ENSMUSG00000029755	ENSMUSG00000039153	ENSMUSG00000003518	ENSMUSG00000031273
GO:BP	regulation of nervous system development	GO:0051960	1.89022e-06	5.72349	957	828	80	20346	ENSMUSG00000033006	ENSMUSG00000031385	ENSMUSG00000015843	ENSMUSG00000020774	ENSMUSG00000022122	ENSMUSG00000026872	ENSMUSG00000059974	ENSMUSG00000047261	ENSMUSG00000021904	ENSMUSG00000042453	ENSMUSG00000036560	ENSMUSG00000026728	ENSMUSG00000059146	ENSMUSG00000024304	ENSMUSG00000042258	ENSMUSG00000002274	ENSMUSG00000035451	ENSMUSG00000038668	ENSMUSG00000055254	ENSMUSG00000026043	ENSMUSG00000061353	ENSMUSG00000039621	ENSMUSG00000025020	ENSMUSG00000018217	ENSMUSG00000023885	ENSMUSG00000037605	ENSMUSG00000026249	ENSMUSG00000040260	ENSMUSG00000055407	ENSMUSG00000045103	ENSMUSG00000027200	ENSMUSG00000052516	ENSMUSG00000023391	ENSMUSG00000031760	ENSMUSG00000032318	ENSMUSG00000038453	ENSMUSG00000032118	ENSMUSG00000068220	ENSMUSG00000027692	ENSMUSG00000023915	ENSMUSG00000015222
GO:BP	positive regulation of biological process	GO:0048518	2.01816e-06	5.69505	5559	854	313	20346	ENSMUSG00000067261	ENSMUSG00000033006	ENSMUSG00000031385	ENSMUSG00000047976	ENSMUSG00000015843	ENSMUSG00000031028	ENSMUSG00000027199	ENSMUSG00000020774	ENSMUSG00000022122	ENSMUSG00000026872	ENSMUSG00000026768	ENSMUSG00000011256	ENSMUSG00000038156	ENSMUSG00000020689	ENSMUSG00000090125	ENSMUSG00000042453	ENSMUSG00000031425	ENSMUSG00000027750	ENSMUSG00000036570	ENSMUSG00000016024	ENSMUSG00000000693	ENSMUSG00000009281	ENSMUSG00000005397	ENSMUSG00000021567	ENSMUSG00000037736	ENSMUSG00000031613	ENSMUSG00000042284	ENSMUSG00000025584	ENSMUSG00000021256	ENSMUSG00000001655	ENSMUSG00000053475	ENSMUSG00000026728	ENSMUSG00000059146	ENSMUSG00000019899	ENSMUSG00000075284	ENSMUSG00000042961	ENSMUSG00000028476	ENSMUSG00000024304	ENSMUSG00000042258	ENSMUSG00000019539	ENSMUSG00000002274
GO:BP	cell morphogenesis involved in neuron differentiation	GO:0048667	2.20564e-06	5.65647	517	908	56	20346	ENSMUSG00000024366	ENSMUSG00000026872	ENSMUSG00000047261	ENSMUSG00000021904	ENSMUSG00000042453	ENSMUSG00000026728	ENSMUSG00000059146	ENSMUSG00000019899	ENSMUSG00000024304	ENSMUSG00000042258	ENSMUSG00000002274	ENSMUSG00000055254	ENSMUSG00000061353	ENSMUSG00000028780	ENSMUSG00000025020	ENSMUSG00000005360	ENSMUSG00000017724	ENSMUSG00000029207	ENSMUSG00000056427	ENSMUSG00000055407	ENSMUSG00000027200	ENSMUSG00000052516	ENSMUSG00000026826	ENSMUSG00000031760	ENSMUSG00000032318	ENSMUSG00000038453	ENSMUSG00000022324	ENSMUSG00000027692	ENSMUSG00000006782	ENSMUSG00000015222	ENSMUSG00000002985	ENSMUSG00000044667	ENSMUSG00000035513	ENSMUSG00000025810	ENSMUSG00000000305	ENSMUSG00000020099	ENSMUSG00000029755	ENSMUSG00000000125	ENSMUSG00000062098	ENSMUSG00000048616	ENSMUSG00000020262
GO:BP	regulation of cellular component organization	GO:0051128	2.54693e-06	5.59398	2280	874	157	20346	ENSMUSG00000031385	ENSMUSG00000026872	ENSMUSG00000059974	ENSMUSG00000047261	ENSMUSG00000021904	ENSMUSG00000031990	ENSMUSG00000020689	ENSMUSG00000042453	ENSMUSG00000063765	ENSMUSG00000027750	ENSMUSG00000016024	ENSMUSG00000037736	ENSMUSG00000026728	ENSMUSG00000059146	ENSMUSG00000024304	ENSMUSG00000042258	ENSMUSG00000002274	ENSMUSG00000038668	ENSMUSG00000070867	ENSMUSG00000031626	ENSMUSG00000055254	ENSMUSG00000029468	ENSMUSG00000015745	ENSMUSG00000021676	ENSMUSG00000061353	ENSMUSG00000039621	ENSMUSG00000025020	ENSMUSG00000018217	ENSMUSG00000032035	ENSMUSG00000023885	ENSMUSG00000032060	ENSMUSG00000037605	ENSMUSG00000026249	ENSMUSG00000029207	ENSMUSG00000056427	ENSMUSG00000019929	ENSMUSG00000055407	ENSMUSG00000045103	ENSMUSG00000027200	ENSMUSG00000015533	ENSMUSG00000052516
GO:BP	regulation of localization	GO:0032879	2.68132e-06	5.57165	2601	708	147	20346	ENSMUSG00000031385	ENSMUSG00000047976	ENSMUSG00000031028	ENSMUSG00000038077	ENSMUSG00000022122	ENSMUSG00000000359	ENSMUSG00000031990	ENSMUSG00000020689	ENSMUSG00000042453	ENSMUSG00000027750	ENSMUSG00000036570	ENSMUSG00000016024	ENSMUSG00000009281	ENSMUSG00000019846	ENSMUSG00000021567	ENSMUSG00000037736	ENSMUSG00000021256	ENSMUSG00000053475	ENSMUSG00000026728	ENSMUSG00000059146	ENSMUSG00000019899	ENSMUSG00000075284	ENSMUSG00000028476	ENSMUSG00000024304	ENSMUSG00000042258	ENSMUSG00000031486	ENSMUSG00000038668	ENSMUSG00000031626	ENSMUSG00000055254	ENSMUSG00000029468	ENSMUSG00000026043	ENSMUSG00000001506	ENSMUSG00000061353	ENSMUSG00000028780	ENSMUSG00000039621	ENSMUSG00000025020	ENSMUSG00000032035	ENSMUSG00000031255	ENSMUSG00000032060	ENSMUSG00000026249	ENSMUSG00000000120
GO:BP	regulation of cell differentiation	GO:0045595	3.4308e-06	5.4646	1834	776	121	20346	ENSMUSG00000033006	ENSMUSG00000031385	ENSMUSG00000030701	ENSMUSG00000040759	ENSMUSG00000020774	ENSMUSG00000022122	ENSMUSG00000026872	ENSMUSG00000044294	ENSMUSG00000059974	ENSMUSG00000037962	ENSMUSG00000020916	ENSMUSG00000021904	ENSMUSG00000020689	ENSMUSG00000042453	ENSMUSG00000063765	ENSMUSG00000027750	ENSMUSG00000000693	ENSMUSG00000009281	ENSMUSG00000026728	ENSMUSG00000059146	ENSMUSG00000028476	ENSMUSG00000024304	ENSMUSG00000042258	ENSMUSG00000002274	ENSMUSG00000031486	ENSMUSG00000035451	ENSMUSG00000038668	ENSMUSG00000055254	ENSMUSG00000026043	ENSMUSG00000001506	ENSMUSG00000061353	ENSMUSG00000024063	ENSMUSG00000028780	ENSMUSG00000039621	ENSMUSG00000025020	ENSMUSG00000018217	ENSMUSG00000032035	ENSMUSG00000026249	ENSMUSG00000040998	ENSMUSG00000040260	ENSMUSG00000055407
GO:BP	response to mechanical stimulus	GO:0009612	4.19518e-06	5.37725	214	220	16	20346	ENSMUSG00000047976	ENSMUSG00000027966	ENSMUSG00000020689	ENSMUSG00000027750	ENSMUSG00000029468	ENSMUSG00000026043	ENSMUSG00000001506	ENSMUSG00000061353	ENSMUSG00000032035	ENSMUSG00000005360	ENSMUSG00000041482	ENSMUSG00000026249	ENSMUSG00000029563	ENSMUSG00000019929	ENSMUSG00000045103	ENSMUSG00000015533
GO:BP	limb morphogenesis	GO:0035108	4.82554e-06	5.31645	154	934	27	20346	ENSMUSG00000028476	ENSMUSG00000028780	ENSMUSG00000037138	ENSMUSG00000037016	ENSMUSG00000021469	ENSMUSG00000026640	ENSMUSG00000030323	ENSMUSG00000029755	ENSMUSG00000018604	ENSMUSG00000000125	ENSMUSG00000039153	ENSMUSG00000027985	ENSMUSG00000048616	ENSMUSG00000000093	ENSMUSG00000031565	ENSMUSG00000024598	ENSMUSG00000027253	ENSMUSG00000052534	ENSMUSG00000031951	ENSMUSG00000020319	ENSMUSG00000004085	ENSMUSG00000036555	ENSMUSG00000031229	ENSMUSG00000027763	ENSMUSG00000047193	ENSMUSG00000034687	ENSMUSG00000057530
GO:BP	appendage morphogenesis	GO:0035107	4.82554e-06	5.31645	154	934	27	20346	ENSMUSG00000028476	ENSMUSG00000028780	ENSMUSG00000037138	ENSMUSG00000037016	ENSMUSG00000021469	ENSMUSG00000026640	ENSMUSG00000030323	ENSMUSG00000029755	ENSMUSG00000018604	ENSMUSG00000000125	ENSMUSG00000039153	ENSMUSG00000027985	ENSMUSG00000048616	ENSMUSG00000000093	ENSMUSG00000031565	ENSMUSG00000024598	ENSMUSG00000027253	ENSMUSG00000052534	ENSMUSG00000031951	ENSMUSG00000020319	ENSMUSG00000004085	ENSMUSG00000036555	ENSMUSG00000031229	ENSMUSG00000027763	ENSMUSG00000047193	ENSMUSG00000034687	ENSMUSG00000057530
GO:BP	collagen fibril organization	GO:0030199	6.16917e-06	5.20977	48	945	15	20346	ENSMUSG00000027966	ENSMUSG00000063765	ENSMUSG00000029661	ENSMUSG00000026043	ENSMUSG00000001506	ENSMUSG00000026837	ENSMUSG00000033327	ENSMUSG00000020473	ENSMUSG00000026042	ENSMUSG00000026574	ENSMUSG00000029163	ENSMUSG00000034205	ENSMUSG00000036446	ENSMUSG00000022105	ENSMUSG00000020716
GO:BP	blood vessel morphogenesis	GO:0048514	6.39859e-06	5.19392	605	776	55	20346	ENSMUSG00000045930	ENSMUSG00000064325	ENSMUSG00000031990	ENSMUSG00000020689	ENSMUSG00000031613	ENSMUSG00000021256	ENSMUSG00000028476	ENSMUSG00000024304	ENSMUSG00000042258	ENSMUSG00000031486	ENSMUSG00000055254	ENSMUSG00000026043	ENSMUSG00000031503	ENSMUSG00000061353	ENSMUSG00000031502	ENSMUSG00000032035	ENSMUSG00000023885	ENSMUSG00000000120	ENSMUSG00000019929	ENSMUSG00000016128	ENSMUSG00000068196	ENSMUSG00000002985	ENSMUSG00000028194	ENSMUSG00000025810	ENSMUSG00000015305	ENSMUSG00000033721	ENSMUSG00000020099	ENSMUSG00000018593	ENSMUSG00000063506	ENSMUSG00000000753	ENSMUSG00000027351	ENSMUSG00000026814	ENSMUSG00000041688	ENSMUSG00000032135	ENSMUSG00000030022	ENSMUSG00000027985	ENSMUSG00000029528	ENSMUSG00000048616	ENSMUSG00000004655	ENSMUSG00000000093	ENSMUSG00000031565
GO:BP	positive regulation of cellular process	GO:0048522	6.64495e-06	5.17751	4921	854	281	20346	ENSMUSG00000067261	ENSMUSG00000033006	ENSMUSG00000031385	ENSMUSG00000015843	ENSMUSG00000020774	ENSMUSG00000022122	ENSMUSG00000026872	ENSMUSG00000026768	ENSMUSG00000038156	ENSMUSG00000020689	ENSMUSG00000090125	ENSMUSG00000042453	ENSMUSG00000027750	ENSMUSG00000016024	ENSMUSG00000000693	ENSMUSG00000009281	ENSMUSG00000021567	ENSMUSG00000037736	ENSMUSG00000031613	ENSMUSG00000042284	ENSMUSG00000025584	ENSMUSG00000001655	ENSMUSG00000053475	ENSMUSG00000026728	ENSMUSG00000059146	ENSMUSG00000019899	ENSMUSG00000028476	ENSMUSG00000024304	ENSMUSG00000042258	ENSMUSG00000019539	ENSMUSG00000002274	ENSMUSG00000021838	ENSMUSG00000031486	ENSMUSG00000035451	ENSMUSG00000038668	ENSMUSG00000070867	ENSMUSG00000055254	ENSMUSG00000038587	ENSMUSG00000029468	ENSMUSG00000026043	ENSMUSG00000001506
GO:BP	tissue morphogenesis	GO:0048729	6.66545e-06	5.17617	609	666	50	20346	ENSMUSG00000033006	ENSMUSG00000026872	ENSMUSG00000027966	ENSMUSG00000026768	ENSMUSG00000064325	ENSMUSG00000042258	ENSMUSG00000035451	ENSMUSG00000026043	ENSMUSG00000061353	ENSMUSG00000028780	ENSMUSG00000031502	ENSMUSG00000038244	ENSMUSG00000017724	ENSMUSG00000040998	ENSMUSG00000015533	ENSMUSG00000026494	ENSMUSG00000016128	ENSMUSG00000044737	ENSMUSG00000039546	ENSMUSG00000035783	ENSMUSG00000037016	ENSMUSG00000033149	ENSMUSG00000021469	ENSMUSG00000026837	ENSMUSG00000059430	ENSMUSG00000044674	ENSMUSG00000030323	ENSMUSG00000025810	ENSMUSG00000022479	ENSMUSG00000071226	ENSMUSG00000026814	ENSMUSG00000039994	ENSMUSG00000018604	ENSMUSG00000032744	ENSMUSG00000000125	ENSMUSG00000027985	ENSMUSG00000029528	ENSMUSG00000048616	ENSMUSG00000020262	ENSMUSG00000000093	ENSMUSG00000036158
GO:BP	negative regulation of cellular process	GO:0048523	6.84524e-06	5.16461	4533	893	273	20346	ENSMUSG00000067261	ENSMUSG00000033006	ENSMUSG00000031385	ENSMUSG00000040759	ENSMUSG00000025780	ENSMUSG00000056569	ENSMUSG00000022122	ENSMUSG00000026872	ENSMUSG00000059974	ENSMUSG00000037962	ENSMUSG00000022103	ENSMUSG00000064325	ENSMUSG00000068794	ENSMUSG00000021904	ENSMUSG00000038156	ENSMUSG00000020689	ENSMUSG00000001985	ENSMUSG00000063765	ENSMUSG00000027750	ENSMUSG00000036570	ENSMUSG00000000693	ENSMUSG00000021567	ENSMUSG00000037736	ENSMUSG00000031613	ENSMUSG00000042284	ENSMUSG00000025584	ENSMUSG00000021256	ENSMUSG00000026728	ENSMUSG00000059146	ENSMUSG00000028476	ENSMUSG00000024304	ENSMUSG00000042258	ENSMUSG00000022419	ENSMUSG00000021838	ENSMUSG00000031486	ENSMUSG00000035451	ENSMUSG00000038668	ENSMUSG00000070867	ENSMUSG00000055254	ENSMUSG00000029468	ENSMUSG00000026043
GO:BP	response to endogenous stimulus	GO:0009719	8.59216e-06	5.0659	1523	695	96	20346	ENSMUSG00000033006	ENSMUSG00000015843	ENSMUSG00000031028	ENSMUSG00000027199	ENSMUSG00000022122	ENSMUSG00000026768	ENSMUSG00000064325	ENSMUSG00000020689	ENSMUSG00000027750	ENSMUSG00000009281	ENSMUSG00000031613	ENSMUSG00000025584	ENSMUSG00000026728	ENSMUSG00000059146	ENSMUSG00000042258	ENSMUSG00000035451	ENSMUSG00000031626	ENSMUSG00000055254	ENSMUSG00000074971	ENSMUSG00000029661	ENSMUSG00000026043	ENSMUSG00000001506	ENSMUSG00000028370	ENSMUSG00000031503	ENSMUSG00000061353	ENSMUSG00000024063	ENSMUSG00000031502	ENSMUSG00000032035	ENSMUSG00000032060	ENSMUSG00000030844	ENSMUSG00000040998	ENSMUSG00000029563	ENSMUSG00000056427	ENSMUSG00000031283	ENSMUSG00000000120	ENSMUSG00000015533	ENSMUSG00000052516	ENSMUSG00000026826	ENSMUSG00000070348	ENSMUSG00000019102	ENSMUSG00000031760
GO:BP	negative regulation of locomotion	GO:0040013	8.7872e-06	5.05615	309	708	34	20346	ENSMUSG00000031385	ENSMUSG00000037736	ENSMUSG00000021256	ENSMUSG00000028476	ENSMUSG00000026043	ENSMUSG00000061353	ENSMUSG00000025020	ENSMUSG00000019929	ENSMUSG00000027200	ENSMUSG00000052516	ENSMUSG00000016128	ENSMUSG00000053141	ENSMUSG00000033149	ENSMUSG00000022885	ENSMUSG00000039985	ENSMUSG00000002985	ENSMUSG00000025314	ENSMUSG00000025810	ENSMUSG00000022548	ENSMUSG00000000753	ENSMUSG00000027351	ENSMUSG00000026814	ENSMUSG00000000125	ENSMUSG00000003518	ENSMUSG00000030022	ENSMUSG00000048616	ENSMUSG00000020262	ENSMUSG00000041120	ENSMUSG00000037242	ENSMUSG00000068015	ENSMUSG00000029163	ENSMUSG00000020427	ENSMUSG00000022596	ENSMUSG00000026883
GO:BP	regulation of biological quality	GO:0065008	9.61665e-06	5.01698	3468	936	228	20346	ENSMUSG00000047976	ENSMUSG00000031028	ENSMUSG00000027199	ENSMUSG00000022122	ENSMUSG00000047261	ENSMUSG00000021904	ENSMUSG00000044139	ENSMUSG00000031990	ENSMUSG00000020689	ENSMUSG00000001985	ENSMUSG00000042453	ENSMUSG00000027750	ENSMUSG00000036570	ENSMUSG00000016024	ENSMUSG00000019846	ENSMUSG00000042284	ENSMUSG00000005686	ENSMUSG00000026728	ENSMUSG00000059146	ENSMUSG00000035735	ENSMUSG00000024304	ENSMUSG00000042258	ENSMUSG00000019539	ENSMUSG00000022419	ENSMUSG00000021838	ENSMUSG00000035451	ENSMUSG00000038668	ENSMUSG00000031626	ENSMUSG00000055254	ENSMUSG00000029468	ENSMUSG00000015745	ENSMUSG00000029661	ENSMUSG00000021676	ENSMUSG00000061353	ENSMUSG00000039621	ENSMUSG00000027611	ENSMUSG00000025020	ENSMUSG00000032035	ENSMUSG00000075702	ENSMUSG00000031255	ENSMUSG00000023885
GO:BP	cell surface receptor signaling pathway involved in cell-cell signaling	GO:1905114	9.65299e-06	5.01534	492	657	43	20346	ENSMUSG00000033006	ENSMUSG00000026872	ENSMUSG00000042453	ENSMUSG00000021567	ENSMUSG00000028476	ENSMUSG00000024304	ENSMUSG00000042258	ENSMUSG00000031486	ENSMUSG00000070867	ENSMUSG00000029468	ENSMUSG00000001506	ENSMUSG00000040260	ENSMUSG00000066607	ENSMUSG00000070348	ENSMUSG00000027692	ENSMUSG00000071847	ENSMUSG00000044674	ENSMUSG00000000782	ENSMUSG00000002985	ENSMUSG00000046876	ENSMUSG00000034771	ENSMUSG00000030409	ENSMUSG00000017314	ENSMUSG00000037712	ENSMUSG00000003378	ENSMUSG00000029053	ENSMUSG00000021959	ENSMUSG00000063060	ENSMUSG00000029755	ENSMUSG00000000125	ENSMUSG00000020566	ENSMUSG00000020176	ENSMUSG00000027985	ENSMUSG00000048616	ENSMUSG00000006800	ENSMUSG00000024268	ENSMUSG00000036158	ENSMUSG00000054196	ENSMUSG00000000142	ENSMUSG00000034910	ENSMUSG00000036169
GO:BP	axon guidance	GO:0007411	1.48608e-05	4.82796	170	887	27	20346	ENSMUSG00000024366	ENSMUSG00000047261	ENSMUSG00000042453	ENSMUSG00000019899	ENSMUSG00000042258	ENSMUSG00000061353	ENSMUSG00000028780	ENSMUSG00000025020	ENSMUSG00000017724	ENSMUSG00000029207	ENSMUSG00000056427	ENSMUSG00000052516	ENSMUSG00000032318	ENSMUSG00000022324	ENSMUSG00000025810	ENSMUSG00000000305	ENSMUSG00000020099	ENSMUSG00000029755	ENSMUSG00000000125	ENSMUSG00000048616	ENSMUSG00000037032	ENSMUSG00000022995	ENSMUSG00000048915	ENSMUSG00000047414	ENSMUSG00000019647	ENSMUSG00000032340	ENSMUSG00000008575
GO:BP	negative regulation of nervous system development	GO:0051961	1.87066e-05	4.72801	318	408	25	20346	ENSMUSG00000033006	ENSMUSG00000022122	ENSMUSG00000059974	ENSMUSG00000021904	ENSMUSG00000026728	ENSMUSG00000059146	ENSMUSG00000042258	ENSMUSG00000038668	ENSMUSG00000026043	ENSMUSG00000025020	ENSMUSG00000018217	ENSMUSG00000040260	ENSMUSG00000045103	ENSMUSG00000027200	ENSMUSG00000023391	ENSMUSG00000031760	ENSMUSG00000032318	ENSMUSG00000068220	ENSMUSG00000023915	ENSMUSG00000015222	ENSMUSG00000002985	ENSMUSG00000030323	ENSMUSG00000009248	ENSMUSG00000025810	ENSMUSG00000014158
GO:BP	regulation of cell adhesion	GO:0030155	2.1215e-05	4.67336	643	776	56	20346	ENSMUSG00000031385	ENSMUSG00000011256	ENSMUSG00000020689	ENSMUSG00000027750	ENSMUSG00000000693	ENSMUSG00000019846	ENSMUSG00000005397	ENSMUSG00000037736	ENSMUSG00000019899	ENSMUSG00000042961	ENSMUSG00000001506	ENSMUSG00000061353	ENSMUSG00000039621	ENSMUSG00000032035	ENSMUSG00000026249	ENSMUSG00000040998	ENSMUSG00000045103	ENSMUSG00000015533	ENSMUSG00000026494	ENSMUSG00000039546	ENSMUSG00000002900	ENSMUSG00000068220	ENSMUSG00000033149	ENSMUSG00000035258	ENSMUSG00000023915	ENSMUSG00000041607	ENSMUSG00000068196	ENSMUSG00000022885	ENSMUSG00000031342	ENSMUSG00000025314	ENSMUSG00000025810	ENSMUSG00000014158	ENSMUSG00000073421	ENSMUSG00000022548	ENSMUSG00000033721	ENSMUSG00000041351	ENSMUSG00000029053	ENSMUSG00000021125	ENSMUSG00000044447	ENSMUSG00000024669	ENSMUSG00000040690
GO:BP	neuron projection guidance	GO:0097485	2.18981e-05	4.65959	173	887	27	20346	ENSMUSG00000024366	ENSMUSG00000047261	ENSMUSG00000042453	ENSMUSG00000019899	ENSMUSG00000042258	ENSMUSG00000061353	ENSMUSG00000028780	ENSMUSG00000025020	ENSMUSG00000017724	ENSMUSG00000029207	ENSMUSG00000056427	ENSMUSG00000052516	ENSMUSG00000032318	ENSMUSG00000022324	ENSMUSG00000025810	ENSMUSG00000000305	ENSMUSG00000020099	ENSMUSG00000029755	ENSMUSG00000000125	ENSMUSG00000048616	ENSMUSG00000037032	ENSMUSG00000022995	ENSMUSG00000048915	ENSMUSG00000047414	ENSMUSG00000019647	ENSMUSG00000032340	ENSMUSG00000008575
GO:BP	regulation of neurogenesis	GO:0050767	2.52054e-05	4.59851	856	828	71	20346	ENSMUSG00000033006	ENSMUSG00000031385	ENSMUSG00000020774	ENSMUSG00000022122	ENSMUSG00000026872	ENSMUSG00000059974	ENSMUSG00000021904	ENSMUSG00000042453	ENSMUSG00000026728	ENSMUSG00000059146	ENSMUSG00000024304	ENSMUSG00000042258	ENSMUSG00000002274	ENSMUSG00000035451	ENSMUSG00000038668	ENSMUSG00000055254	ENSMUSG00000026043	ENSMUSG00000061353	ENSMUSG00000039621	ENSMUSG00000025020	ENSMUSG00000018217	ENSMUSG00000026249	ENSMUSG00000040260	ENSMUSG00000055407	ENSMUSG00000045103	ENSMUSG00000027200	ENSMUSG00000052516	ENSMUSG00000023391	ENSMUSG00000031760	ENSMUSG00000032318	ENSMUSG00000038453	ENSMUSG00000032118	ENSMUSG00000068220	ENSMUSG00000027692	ENSMUSG00000023915	ENSMUSG00000015222	ENSMUSG00000044674	ENSMUSG00000030638	ENSMUSG00000002985	ENSMUSG00000009248	ENSMUSG00000046876
GO:BP	regulation of Wnt signaling pathway	GO:0030111	2.63731e-05	4.57884	267	774	32	20346	ENSMUSG00000033006	ENSMUSG00000026872	ENSMUSG00000021567	ENSMUSG00000028476	ENSMUSG00000024304	ENSMUSG00000042258	ENSMUSG00000031486	ENSMUSG00000070867	ENSMUSG00000001506	ENSMUSG00000040260	ENSMUSG00000071847	ENSMUSG00000044674	ENSMUSG00000002985	ENSMUSG00000034771	ENSMUSG00000021959	ENSMUSG00000063060	ENSMUSG00000029755	ENSMUSG00000000125	ENSMUSG00000020566	ENSMUSG00000020176	ENSMUSG00000027985	ENSMUSG00000048616	ENSMUSG00000006800	ENSMUSG00000036158	ENSMUSG00000054196	ENSMUSG00000000142	ENSMUSG00000036169	ENSMUSG00000014039	ENSMUSG00000027253	ENSMUSG00000026883	ENSMUSG00000041075	ENSMUSG00000028344
GO:BP	negative regulation of developmental process	GO:0051093	2.89682e-05	4.53808	1058	673	71	20346	ENSMUSG00000033006	ENSMUSG00000040759	ENSMUSG00000022122	ENSMUSG00000059974	ENSMUSG00000037962	ENSMUSG00000064325	ENSMUSG00000021904	ENSMUSG00000020689	ENSMUSG00000063765	ENSMUSG00000027750	ENSMUSG00000000693	ENSMUSG00000021256	ENSMUSG00000026728	ENSMUSG00000059146	ENSMUSG00000042258	ENSMUSG00000035451	ENSMUSG00000038668	ENSMUSG00000026043	ENSMUSG00000031503	ENSMUSG00000024063	ENSMUSG00000025020	ENSMUSG00000018217	ENSMUSG00000023885	ENSMUSG00000017724	ENSMUSG00000040260	ENSMUSG00000000120	ENSMUSG00000019929	ENSMUSG00000045103	ENSMUSG00000027200	ENSMUSG00000016128	ENSMUSG00000070348	ENSMUSG00000023391	ENSMUSG00000031760	ENSMUSG00000032318	ENSMUSG00000067586	ENSMUSG00000068220	ENSMUSG00000033149	ENSMUSG00000032363	ENSMUSG00000021469	ENSMUSG00000023915	ENSMUSG00000026837
GO:BP	negative regulation of biological process	GO:0048519	3.03577e-05	4.51773	5055	893	295	20346	ENSMUSG00000067261	ENSMUSG00000052229	ENSMUSG00000033006	ENSMUSG00000031385	ENSMUSG00000040759	ENSMUSG00000025780	ENSMUSG00000019874	ENSMUSG00000056569	ENSMUSG00000022122	ENSMUSG00000026872	ENSMUSG00000000359	ENSMUSG00000059974	ENSMUSG00000037962	ENSMUSG00000022103	ENSMUSG00000064325	ENSMUSG00000068794	ENSMUSG00000021904	ENSMUSG00000038156	ENSMUSG00000020689	ENSMUSG00000001985	ENSMUSG00000063765	ENSMUSG00000027750	ENSMUSG00000036570	ENSMUSG00000016024	ENSMUSG00000000693	ENSMUSG00000019846	ENSMUSG00000021567	ENSMUSG00000037736	ENSMUSG00000031613	ENSMUSG00000042284	ENSMUSG00000025584	ENSMUSG00000021256	ENSMUSG00000053475	ENSMUSG00000026728	ENSMUSG00000059146	ENSMUSG00000028476	ENSMUSG00000024304	ENSMUSG00000042258	ENSMUSG00000022419	ENSMUSG00000021838	ENSMUSG00000031486
GO:BP	negative regulation of cell development	GO:0010721	3.3877e-05	4.47009	352	408	26	20346	ENSMUSG00000033006	ENSMUSG00000022122	ENSMUSG00000059974	ENSMUSG00000037962	ENSMUSG00000021904	ENSMUSG00000027750	ENSMUSG00000026728	ENSMUSG00000059146	ENSMUSG00000042258	ENSMUSG00000038668	ENSMUSG00000026043	ENSMUSG00000025020	ENSMUSG00000018217	ENSMUSG00000040260	ENSMUSG00000045103	ENSMUSG00000027200	ENSMUSG00000023391	ENSMUSG00000031760	ENSMUSG00000032318	ENSMUSG00000067586	ENSMUSG00000068220	ENSMUSG00000015222	ENSMUSG00000002985	ENSMUSG00000009248	ENSMUSG00000025810	ENSMUSG00000014158
GO:BP	negative regulation of cellular component movement	GO:0051271	3.90602e-05	4.40827	296	708	32	20346	ENSMUSG00000031385	ENSMUSG00000037736	ENSMUSG00000021256	ENSMUSG00000028476	ENSMUSG00000026043	ENSMUSG00000061353	ENSMUSG00000025020	ENSMUSG00000019929	ENSMUSG00000027200	ENSMUSG00000016128	ENSMUSG00000053141	ENSMUSG00000033149	ENSMUSG00000039985	ENSMUSG00000002985	ENSMUSG00000025314	ENSMUSG00000025810	ENSMUSG00000022548	ENSMUSG00000000753	ENSMUSG00000027351	ENSMUSG00000026814	ENSMUSG00000000125	ENSMUSG00000003518	ENSMUSG00000030022	ENSMUSG00000048616	ENSMUSG00000020262	ENSMUSG00000041120	ENSMUSG00000037242	ENSMUSG00000068015	ENSMUSG00000029163	ENSMUSG00000020427	ENSMUSG00000022596	ENSMUSG00000026883
GO:BP	negative regulation of cellular component movement	GO:0034446	4.20352e-05	4.37639	86	966	19	20346	ENSMUSG00000026768	ENSMUSG00000020689	ENSMUSG00000027750	ENSMUSG00000039621	ENSMUSG00000038453	ENSMUSG00000002900	ENSMUSG00000022885	ENSMUSG00000025810	ENSMUSG00000037712	ENSMUSG00000044447	ENSMUSG00000029528	ENSMUSG00000026478	ENSMUSG00000048915	ENSMUSG00000041075	ENSMUSG00000021365	ENSMUSG00000030770	ENSMUSG00000026193	ENSMUSG00000002602	ENSMUSG00000033420
GO:BP	peripheral nervous system development	GO:0007422	5.04277e-05	4.29733	68	138	8	20346	ENSMUSG00000033006	ENSMUSG00000022122	ENSMUSG00000090125	ENSMUSG00000036560	ENSMUSG00000059146	ENSMUSG00000019899	ENSMUSG00000042258	ENSMUSG00000055254
GO:BP	collagen biosynthetic process	GO:0032964	5.13554e-05	4.28941	58	893	15	20346	ENSMUSG00000026728	ENSMUSG00000019539	ENSMUSG00000001506	ENSMUSG00000015533	ENSMUSG00000067001	ENSMUSG00000023191	ENSMUSG00000040297	ENSMUSG00000027947	ENSMUSG00000026837	ENSMUSG00000026814	ENSMUSG00000060216	ENSMUSG00000029163	ENSMUSG00000015452	ENSMUSG00000019997	ENSMUSG00000001870
GO:BP	regulation of cell morphogenesis involved in differentiation	GO:0010769	5.80194e-05	4.23643	293	435	24	20346	ENSMUSG00000026872	ENSMUSG00000021904	ENSMUSG00000020689	ENSMUSG00000042453	ENSMUSG00000027750	ENSMUSG00000026728	ENSMUSG00000059146	ENSMUSG00000024304	ENSMUSG00000002274	ENSMUSG00000055254	ENSMUSG00000061353	ENSMUSG00000039621	ENSMUSG00000025020	ENSMUSG00000055407	ENSMUSG00000027200	ENSMUSG00000052516	ENSMUSG00000031760	ENSMUSG00000038453	ENSMUSG00000027692	ENSMUSG00000015222	ENSMUSG00000022885	ENSMUSG00000002985	ENSMUSG00000025810	ENSMUSG00000000305
GO:BP	glial cell development	GO:0021782	6.34702e-05	4.19743	99	138	9	20346	ENSMUSG00000033006	ENSMUSG00000020774	ENSMUSG00000090125	ENSMUSG00000031425	ENSMUSG00000036560	ENSMUSG00000026728	ENSMUSG00000059146	ENSMUSG00000038668	ENSMUSG00000055254
GO:BP	positive regulation of multicellular organismal process	GO:0051240	7.13628e-05	4.14653	1799	797	117	20346	ENSMUSG00000033006	ENSMUSG00000031385	ENSMUSG00000027199	ENSMUSG00000020774	ENSMUSG00000022122	ENSMUSG00000026872	ENSMUSG00000020689	ENSMUSG00000042453	ENSMUSG00000027750	ENSMUSG00000016024	ENSMUSG00000026728	ENSMUSG00000059146	ENSMUSG00000042258	ENSMUSG00000002274	ENSMUSG00000031486	ENSMUSG00000035451	ENSMUSG00000038668	ENSMUSG00000055254	ENSMUSG00000029468	ENSMUSG00000001506	ENSMUSG00000061353	ENSMUSG00000024063	ENSMUSG00000028780	ENSMUSG00000032035	ENSMUSG00000023885	ENSMUSG00000037605	ENSMUSG00000026249	ENSMUSG00000040998	ENSMUSG00000029563	ENSMUSG00000055407	ENSMUSG00000045103	ENSMUSG00000015533	ENSMUSG00000052516	ENSMUSG00000070348	ENSMUSG00000023391	ENSMUSG00000010066	ENSMUSG00000032118	ENSMUSG00000032076	ENSMUSG00000067001	ENSMUSG00000025083	ENSMUSG00000033149
GO:BP	angiogenesis	GO:0001525	8.98336e-05	4.04656	507	868	50	20346	ENSMUSG00000045930	ENSMUSG00000064325	ENSMUSG00000031990	ENSMUSG00000020689	ENSMUSG00000021256	ENSMUSG00000028476	ENSMUSG00000042258	ENSMUSG00000031486	ENSMUSG00000031503	ENSMUSG00000061353	ENSMUSG00000031502	ENSMUSG00000032035	ENSMUSG00000023885	ENSMUSG00000000120	ENSMUSG00000019929	ENSMUSG00000016128	ENSMUSG00000068196	ENSMUSG00000028194	ENSMUSG00000025810	ENSMUSG00000015305	ENSMUSG00000033721	ENSMUSG00000020099	ENSMUSG00000018593	ENSMUSG00000063506	ENSMUSG00000000753	ENSMUSG00000027351	ENSMUSG00000026814	ENSMUSG00000041688	ENSMUSG00000032135	ENSMUSG00000030022	ENSMUSG00000027985	ENSMUSG00000029528	ENSMUSG00000004655	ENSMUSG00000031565	ENSMUSG00000037242	ENSMUSG00000030123	ENSMUSG00000060188	ENSMUSG00000029163	ENSMUSG00000024140	ENSMUSG00000026883	ENSMUSG00000034205
GO:BP	regulation of cell morphogenesis	GO:0022604	9.52849e-05	4.02098	458	473	32	20346	ENSMUSG00000026872	ENSMUSG00000021904	ENSMUSG00000020689	ENSMUSG00000042453	ENSMUSG00000027750	ENSMUSG00000026728	ENSMUSG00000059146	ENSMUSG00000024304	ENSMUSG00000002274	ENSMUSG00000038668	ENSMUSG00000055254	ENSMUSG00000015745	ENSMUSG00000061353	ENSMUSG00000039621	ENSMUSG00000025020	ENSMUSG00000055407	ENSMUSG00000027200	ENSMUSG00000052516	ENSMUSG00000031760	ENSMUSG00000038453	ENSMUSG00000027692	ENSMUSG00000015222	ENSMUSG00000022885	ENSMUSG00000024044	ENSMUSG00000002985	ENSMUSG00000025810	ENSMUSG00000049521	ENSMUSG00000000305	ENSMUSG00000037712	ENSMUSG00000018593	ENSMUSG00000048455	ENSMUSG00000044447
GO:BP	embryonic appendage morphogenesis	GO:0035113	9.91493e-05	4.00371	133	934	23	20346	ENSMUSG00000028476	ENSMUSG00000037138	ENSMUSG00000037016	ENSMUSG00000021469	ENSMUSG00000030323	ENSMUSG00000029755	ENSMUSG00000018604	ENSMUSG00000000125	ENSMUSG00000039153	ENSMUSG00000027985	ENSMUSG00000048616	ENSMUSG00000000093	ENSMUSG00000031565	ENSMUSG00000024598	ENSMUSG00000027253	ENSMUSG00000052534	ENSMUSG00000031951	ENSMUSG00000020319	ENSMUSG00000004085	ENSMUSG00000027763	ENSMUSG00000047193	ENSMUSG00000034687	ENSMUSG00000057530
GO:BP	embryonic limb morphogenesis	GO:0030326	9.91493e-05	4.00371	133	934	23	20346	ENSMUSG00000028476	ENSMUSG00000037138	ENSMUSG00000037016	ENSMUSG00000021469	ENSMUSG00000030323	ENSMUSG00000029755	ENSMUSG00000018604	ENSMUSG00000000125	ENSMUSG00000039153	ENSMUSG00000027985	ENSMUSG00000048616	ENSMUSG00000000093	ENSMUSG00000031565	ENSMUSG00000024598	ENSMUSG00000027253	ENSMUSG00000052534	ENSMUSG00000031951	ENSMUSG00000020319	ENSMUSG00000004085	ENSMUSG00000027763	ENSMUSG00000047193	ENSMUSG00000034687	ENSMUSG00000057530
GO:BP	cellular response to endogenous stimulus	GO:0071495	0.000113955	3.94326	1230	695	79	20346	ENSMUSG00000033006	ENSMUSG00000015843	ENSMUSG00000026768	ENSMUSG00000064325	ENSMUSG00000020689	ENSMUSG00000027750	ENSMUSG00000009281	ENSMUSG00000031613	ENSMUSG00000025584	ENSMUSG00000026728	ENSMUSG00000042258	ENSMUSG00000035451	ENSMUSG00000031626	ENSMUSG00000055254	ENSMUSG00000029661	ENSMUSG00000026043	ENSMUSG00000001506	ENSMUSG00000031503	ENSMUSG00000024063	ENSMUSG00000031502	ENSMUSG00000030844	ENSMUSG00000040998	ENSMUSG00000056427	ENSMUSG00000031283	ENSMUSG00000000120	ENSMUSG00000015533	ENSMUSG00000052516	ENSMUSG00000026826	ENSMUSG00000031760	ENSMUSG00000056515	ENSMUSG00000032363	ENSMUSG00000021469	ENSMUSG00000029802	ENSMUSG00000044674	ENSMUSG00000026042	ENSMUSG00000033763	ENSMUSG00000025082	ENSMUSG00000022479	ENSMUSG00000049699	ENSMUSG00000021388	ENSMUSG00000041351
GO:BP	head development	GO:0060322	0.00011406	3.94287	737	637	52	20346	ENSMUSG00000047976	ENSMUSG00000019874	ENSMUSG00000026872	ENSMUSG00000026768	ENSMUSG00000090125	ENSMUSG00000042453	ENSMUSG00000024304	ENSMUSG00000042258	ENSMUSG00000038668	ENSMUSG00000055254	ENSMUSG00000026043	ENSMUSG00000001506	ENSMUSG00000061353	ENSMUSG00000056596	ENSMUSG00000031502	ENSMUSG00000025020	ENSMUSG00000032035	ENSMUSG00000026249	ENSMUSG00000029563	ENSMUSG00000045103	ENSMUSG00000027200	ENSMUSG00000052516	ENSMUSG00000026826	ENSMUSG00000023391	ENSMUSG00000031760	ENSMUSG00000026890	ENSMUSG00000002900	ENSMUSG00000032118	ENSMUSG00000051323	ENSMUSG00000028655	ENSMUSG00000006782	ENSMUSG00000026640	ENSMUSG00000046876	ENSMUSG00000025810	ENSMUSG00000022548	ENSMUSG00000001497	ENSMUSG00000001911	ENSMUSG00000029755	ENSMUSG00000010064	ENSMUSG00000018604	ENSMUSG00000000125
GO:BP	negative regulation of neurogenesis	GO:0050768	0.000120174	3.92019	300	408	23	20346	ENSMUSG00000033006	ENSMUSG00000022122	ENSMUSG00000059974	ENSMUSG00000021904	ENSMUSG00000026728	ENSMUSG00000059146	ENSMUSG00000042258	ENSMUSG00000038668	ENSMUSG00000026043	ENSMUSG00000025020	ENSMUSG00000018217	ENSMUSG00000040260	ENSMUSG00000045103	ENSMUSG00000027200	ENSMUSG00000023391	ENSMUSG00000031760	ENSMUSG00000032318	ENSMUSG00000068220	ENSMUSG00000015222	ENSMUSG00000002985	ENSMUSG00000009248	ENSMUSG00000025810	ENSMUSG00000014158
GO:BP	negative regulation of cell migration	GO:0030336	0.000130455	3.88454	264	708	29	20346	ENSMUSG00000031385	ENSMUSG00000037736	ENSMUSG00000021256	ENSMUSG00000028476	ENSMUSG00000026043	ENSMUSG00000061353	ENSMUSG00000019929	ENSMUSG00000027200	ENSMUSG00000016128	ENSMUSG00000053141	ENSMUSG00000033149	ENSMUSG00000039985	ENSMUSG00000002985	ENSMUSG00000025314	ENSMUSG00000022548	ENSMUSG00000000753	ENSMUSG00000027351	ENSMUSG00000026814	ENSMUSG00000003518	ENSMUSG00000030022	ENSMUSG00000048616	ENSMUSG00000020262	ENSMUSG00000041120	ENSMUSG00000037242	ENSMUSG00000068015	ENSMUSG00000029163	ENSMUSG00000020427	ENSMUSG00000022596	ENSMUSG00000026883
GO:BP	sensory organ development	GO:0007423	0.000156009	3.80685	561	703	46	20346	ENSMUSG00000031028	ENSMUSG00000026872	ENSMUSG00000027966	ENSMUSG00000026768	ENSMUSG00000001655	ENSMUSG00000026728	ENSMUSG00000059146	ENSMUSG00000055254	ENSMUSG00000031502	ENSMUSG00000032060	ENSMUSG00000029563	ENSMUSG00000031283	ENSMUSG00000023391	ENSMUSG00000037016	ENSMUSG00000055435	ENSMUSG00000026837	ENSMUSG00000068196	ENSMUSG00000031561	ENSMUSG00000028121	ENSMUSG00000030323	ENSMUSG00000044667	ENSMUSG00000026042	ENSMUSG00000025810	ENSMUSG00000023912	ENSMUSG00000018593	ENSMUSG00000071226	ENSMUSG00000000753	ENSMUSG00000029755	ENSMUSG00000027985	ENSMUSG00000048616	ENSMUSG00000024268	ENSMUSG00000004655	ENSMUSG00000000093	ENSMUSG00000017639	ENSMUSG00000031565	ENSMUSG00000060572	ENSMUSG00000054196	ENSMUSG00000037242	ENSMUSG00000022656	ENSMUSG00000024598	ENSMUSG00000037325
GO:BP	actin filament-based process	GO:0030029	0.00018617	3.73009	667	966	64	20346	ENSMUSG00000037962	ENSMUSG00000031990	ENSMUSG00000020689	ENSMUSG00000036570	ENSMUSG00000037736	ENSMUSG00000059146	ENSMUSG00000075284	ENSMUSG00000025006	ENSMUSG00000038668	ENSMUSG00000031626	ENSMUSG00000021676	ENSMUSG00000039621	ENSMUSG00000038244	ENSMUSG00000041729	ENSMUSG00000040260	ENSMUSG00000029207	ENSMUSG00000029675	ENSMUSG00000038729	ENSMUSG00000035783	ENSMUSG00000027692	ENSMUSG00000033149	ENSMUSG00000022439	ENSMUSG00000041734	ENSMUSG00000033985	ENSMUSG00000035407	ENSMUSG00000024533	ENSMUSG00000024044	ENSMUSG00000031342	ENSMUSG00000037679	ENSMUSG00000025810	ENSMUSG00000014158	ENSMUSG00000020866	ENSMUSG00000041688	ENSMUSG00000029528	ENSMUSG00000028465	ENSMUSG00000004655	ENSMUSG00000019978	ENSMUSG00000026335	ENSMUSG00000037032	ENSMUSG00000018417	ENSMUSG00000029761
GO:BP	embryonic morphogenesis	GO:0048598	0.000206003	3.68613	616	934	59	20346	ENSMUSG00000026872	ENSMUSG00000027966	ENSMUSG00000026768	ENSMUSG00000028476	ENSMUSG00000031503	ENSMUSG00000038244	ENSMUSG00000015533	ENSMUSG00000037138	ENSMUSG00000023391	ENSMUSG00000037016	ENSMUSG00000002900	ENSMUSG00000033149	ENSMUSG00000021469	ENSMUSG00000041607	ENSMUSG00000026837	ENSMUSG00000068196	ENSMUSG00000044674	ENSMUSG00000000782	ENSMUSG00000030323	ENSMUSG00000026042	ENSMUSG00000071226	ENSMUSG00000021959	ENSMUSG00000063060	ENSMUSG00000026814	ENSMUSG00000041688	ENSMUSG00000029755	ENSMUSG00000018604	ENSMUSG00000000125	ENSMUSG00000039153	ENSMUSG00000027985	ENSMUSG00000048616	ENSMUSG00000000093	ENSMUSG00000036158	ENSMUSG00000031565	ENSMUSG00000060572	ENSMUSG00000054196	ENSMUSG00000024598	ENSMUSG00000027253	ENSMUSG00000052534	ENSMUSG00000022995	ENSMUSG00000002799
GO:BP	regulation of cell communication	GO:0010646	0.00020727	3.68346	3201	918	204	20346	ENSMUSG00000033006	ENSMUSG00000031354	ENSMUSG00000040759	ENSMUSG00000026872	ENSMUSG00000026768	ENSMUSG00000064325	ENSMUSG00000020689	ENSMUSG00000001985	ENSMUSG00000042453	ENSMUSG00000027750	ENSMUSG00000016024	ENSMUSG00000000693	ENSMUSG00000009281	ENSMUSG00000021567	ENSMUSG00000042284	ENSMUSG00000025584	ENSMUSG00000059146	ENSMUSG00000019899	ENSMUSG00000028476	ENSMUSG00000024304	ENSMUSG00000042258	ENSMUSG00000019539	ENSMUSG00000022419	ENSMUSG00000031486	ENSMUSG00000035451	ENSMUSG00000038668	ENSMUSG00000070867	ENSMUSG00000055254	ENSMUSG00000038587	ENSMUSG00000029468	ENSMUSG00000026043	ENSMUSG00000001506	ENSMUSG00000061353	ENSMUSG00000024063	ENSMUSG00000060548	ENSMUSG00000039621	ENSMUSG00000031255	ENSMUSG00000005360	ENSMUSG00000030844	ENSMUSG00000026249	ENSMUSG00000040998
GO:BP	collagen metabolic process	GO:0032963	0.000221999	3.65365	92	893	18	20346	ENSMUSG00000026728	ENSMUSG00000019539	ENSMUSG00000029468	ENSMUSG00000001506	ENSMUSG00000015533	ENSMUSG00000067001	ENSMUSG00000023191	ENSMUSG00000040297	ENSMUSG00000027947	ENSMUSG00000026837	ENSMUSG00000033327	ENSMUSG00000026814	ENSMUSG00000060216	ENSMUSG00000029163	ENSMUSG00000042436	ENSMUSG00000015452	ENSMUSG00000019997	ENSMUSG00000001870
GO:BP	brain development	GO:0007420	0.000243886	3.61281	691	637	49	20346	ENSMUSG00000047976	ENSMUSG00000019874	ENSMUSG00000026872	ENSMUSG00000026768	ENSMUSG00000090125	ENSMUSG00000042453	ENSMUSG00000024304	ENSMUSG00000042258	ENSMUSG00000038668	ENSMUSG00000055254	ENSMUSG00000026043	ENSMUSG00000061353	ENSMUSG00000056596	ENSMUSG00000031502	ENSMUSG00000025020	ENSMUSG00000032035	ENSMUSG00000026249	ENSMUSG00000029563	ENSMUSG00000045103	ENSMUSG00000027200	ENSMUSG00000052516	ENSMUSG00000026826	ENSMUSG00000023391	ENSMUSG00000031760	ENSMUSG00000026890	ENSMUSG00000002900	ENSMUSG00000032118	ENSMUSG00000051323	ENSMUSG00000028655	ENSMUSG00000006782	ENSMUSG00000026640	ENSMUSG00000046876	ENSMUSG00000025810	ENSMUSG00000022548	ENSMUSG00000001911	ENSMUSG00000029755	ENSMUSG00000010064	ENSMUSG00000018604	ENSMUSG00000000125	ENSMUSG00000027985	ENSMUSG00000062098
GO:BP	regulation of neuron differentiation	GO:0045664	0.000244525	3.61168	697	292	30	20346	ENSMUSG00000031385	ENSMUSG00000022122	ENSMUSG00000026872	ENSMUSG00000059974	ENSMUSG00000021904	ENSMUSG00000042453	ENSMUSG00000026728	ENSMUSG00000059146	ENSMUSG00000024304	ENSMUSG00000042258	ENSMUSG00000002274	ENSMUSG00000035451	ENSMUSG00000038668	ENSMUSG00000055254	ENSMUSG00000061353	ENSMUSG00000039621	ENSMUSG00000025020	ENSMUSG00000018217	ENSMUSG00000026249	ENSMUSG00000055407	ENSMUSG00000045103	ENSMUSG00000027200	ENSMUSG00000052516	ENSMUSG00000023391	ENSMUSG00000031760	ENSMUSG00000032318	ENSMUSG00000038453	ENSMUSG00000032118	ENSMUSG00000068220	ENSMUSG00000027692
GO:BP	canonical Wnt signaling pathway	GO:0060070	0.000295068	3.53008	260	837	31	20346	ENSMUSG00000033006	ENSMUSG00000021567	ENSMUSG00000028476	ENSMUSG00000024304	ENSMUSG00000042258	ENSMUSG00000031486	ENSMUSG00000001506	ENSMUSG00000040260	ENSMUSG00000044674	ENSMUSG00000000782	ENSMUSG00000002985	ENSMUSG00000034771	ENSMUSG00000021959	ENSMUSG00000063060	ENSMUSG00000029755	ENSMUSG00000000125	ENSMUSG00000027985	ENSMUSG00000048616	ENSMUSG00000006800	ENSMUSG00000036158	ENSMUSG00000054196	ENSMUSG00000000142	ENSMUSG00000034910	ENSMUSG00000036169	ENSMUSG00000014039	ENSMUSG00000027253	ENSMUSG00000026883	ENSMUSG00000041075	ENSMUSG00000028344	ENSMUSG00000037989	ENSMUSG00000038256
GO:BP	regulation of signaling	GO:0023051	0.000303179	3.5183	3217	918	204	20346	ENSMUSG00000033006	ENSMUSG00000031354	ENSMUSG00000040759	ENSMUSG00000026872	ENSMUSG00000026768	ENSMUSG00000064325	ENSMUSG00000020689	ENSMUSG00000001985	ENSMUSG00000042453	ENSMUSG00000027750	ENSMUSG00000016024	ENSMUSG00000000693	ENSMUSG00000009281	ENSMUSG00000021567	ENSMUSG00000042284	ENSMUSG00000025584	ENSMUSG00000059146	ENSMUSG00000019899	ENSMUSG00000028476	ENSMUSG00000024304	ENSMUSG00000042258	ENSMUSG00000019539	ENSMUSG00000022419	ENSMUSG00000031486	ENSMUSG00000035451	ENSMUSG00000038668	ENSMUSG00000070867	ENSMUSG00000055254	ENSMUSG00000038587	ENSMUSG00000029468	ENSMUSG00000026043	ENSMUSG00000001506	ENSMUSG00000061353	ENSMUSG00000024063	ENSMUSG00000060548	ENSMUSG00000039621	ENSMUSG00000031255	ENSMUSG00000005360	ENSMUSG00000030844	ENSMUSG00000026249	ENSMUSG00000040998
GO:BP	cell-substrate adherens junction assembly	GO:0007045	0.000310929	3.50734	71	703	14	20346	ENSMUSG00000037736	ENSMUSG00000015533	ENSMUSG00000033149	ENSMUSG00000033985	ENSMUSG00000031342	ENSMUSG00000025314	ENSMUSG00000025810	ENSMUSG00000022548	ENSMUSG00000037712	ENSMUSG00000040690	ENSMUSG00000003518	ENSMUSG00000029528	ENSMUSG00000048915	ENSMUSG00000020319
GO:BP	focal adhesion assembly	GO:0048041	0.000310929	3.50734	71	703	14	20346	ENSMUSG00000037736	ENSMUSG00000015533	ENSMUSG00000033149	ENSMUSG00000033985	ENSMUSG00000031342	ENSMUSG00000025314	ENSMUSG00000025810	ENSMUSG00000022548	ENSMUSG00000037712	ENSMUSG00000040690	ENSMUSG00000003518	ENSMUSG00000029528	ENSMUSG00000048915	ENSMUSG00000020319
GO:BP	tissue migration	GO:0090130	0.000312466	3.5052	292	745	31	20346	ENSMUSG00000026872	ENSMUSG00000045930	ENSMUSG00000020689	ENSMUSG00000021256	ENSMUSG00000031486	ENSMUSG00000032035	ENSMUSG00000019929	ENSMUSG00000015533	ENSMUSG00000016128	ENSMUSG00000035783	ENSMUSG00000059430	ENSMUSG00000002985	ENSMUSG00000025810	ENSMUSG00000015305	ENSMUSG00000018593	ENSMUSG00000000753	ENSMUSG00000044447	ENSMUSG00000027351	ENSMUSG00000041688	ENSMUSG00000030022	ENSMUSG00000029528	ENSMUSG00000004655	ENSMUSG00000031565	ENSMUSG00000031555	ENSMUSG00000030123	ENSMUSG00000045038	ENSMUSG00000020319	ENSMUSG00000059895	ENSMUSG00000026883	ENSMUSG00000034205	ENSMUSG00000031841
GO:BP	Wnt signaling pathway	GO:0016055	0.000313391	3.50391	384	657	34	20346	ENSMUSG00000033006	ENSMUSG00000026872	ENSMUSG00000021567	ENSMUSG00000028476	ENSMUSG00000024304	ENSMUSG00000042258	ENSMUSG00000031486	ENSMUSG00000070867	ENSMUSG00000001506	ENSMUSG00000040260	ENSMUSG00000070348	ENSMUSG00000027692	ENSMUSG00000071847	ENSMUSG00000044674	ENSMUSG00000000782	ENSMUSG00000002985	ENSMUSG00000034771	ENSMUSG00000037712	ENSMUSG00000021959	ENSMUSG00000063060	ENSMUSG00000029755	ENSMUSG00000000125	ENSMUSG00000020566	ENSMUSG00000020176	ENSMUSG00000027985	ENSMUSG00000048616	ENSMUSG00000006800	ENSMUSG00000036158	ENSMUSG00000054196	ENSMUSG00000000142	ENSMUSG00000034910	ENSMUSG00000036169	ENSMUSG00000014039	ENSMUSG00000027253
GO:BP	cellular response to organic substance	GO:0071310	0.000351595	3.45396	2161	708	120	20346	ENSMUSG00000033006	ENSMUSG00000025964	ENSMUSG00000015843	ENSMUSG00000022122	ENSMUSG00000026768	ENSMUSG00000064325	ENSMUSG00000020689	ENSMUSG00000027750	ENSMUSG00000016024	ENSMUSG00000009281	ENSMUSG00000031613	ENSMUSG00000025584	ENSMUSG00000026728	ENSMUSG00000059146	ENSMUSG00000042258	ENSMUSG00000031486	ENSMUSG00000035451	ENSMUSG00000038668	ENSMUSG00000031626	ENSMUSG00000055254	ENSMUSG00000029468	ENSMUSG00000029661	ENSMUSG00000026043	ENSMUSG00000001506	ENSMUSG00000031503	ENSMUSG00000061353	ENSMUSG00000024063	ENSMUSG00000031502	ENSMUSG00000025089	ENSMUSG00000030844	ENSMUSG00000040998	ENSMUSG00000045932	ENSMUSG00000056427	ENSMUSG00000031283	ENSMUSG00000000120	ENSMUSG00000019929	ENSMUSG00000045103	ENSMUSG00000015533	ENSMUSG00000052516	ENSMUSG00000026826	ENSMUSG00000070348
[truncated: 107 more rows]
[truncated: 206 more columns]

## Sheet: 1f GFP_High_AME
1f: List of transcription factor binding motifs enriched in SOX2-GFP_High cells .
[truncated: 124 more rows]

## Sheet: 1g GFP_High_Foxa1&2_Sox2_Hits
1g: List of SOX2-GFP_High DEGs that are potential targets of Sox2_Foxa1_Foxa2
				SOX2 FOXA1 - no signif GO hits
[truncated: 233 more rows]

## Sheet: 1h FOXA1_A2_SOX2 Panther GO
1h. Gene Ontology (GO) biological process terms associated with FOXA2 and/or FOXA1 and/or SOX2 target genes enriched in SOX2-GFPlhigh lingual epithelial cells
[truncated: 26 more rows]

[truncated: 1 more sheets: 1i FOXA1_A2 Panther GO genes]
